# Supplementary material for: Integration of Data from Liquid–Liquid Phase Separation Databases Highlights Concentration and Dosage Sensitivity of LLPS Drivers
Source: Int J Mol Sci. 2021 Mar 16;22(6):3017. doi: 10.3390/ijms22063017 (PMC8002189; doi:10.3390/ijms22063017)
Supplement: Supplementary file 1 [file ijms-22-03017-s001.zip › a_Farahi_supplementary_tables.xlsx]

## Sheet: Supplementary table 1
Table S1: List of 251 potential LLPS drivers from all organisms (before filtering) derived from the different resources and depicted in Figure 2A.
Gene name	UniProt AC	PhaSePro	DrLLPS	LLPSDB	Human protein?
fp-3	Q2Q9Z6	no	no	yes	no
n/a	B1MUF0	no	no	yes	no
Cgas	Q8C6L5	no	yes	yes	no
Cbx5	Q61686	no	yes	yes	no
PAB1	P04147	yes	yes	yes	no
RARA	P10276	no	yes	yes	yes
AR	P10275	no	no	yes	yes
LGALS3	P17931	yes	yes	no	yes
HNRNPA1L2	Q32P51	no	yes	yes	yes
GNL2	Q13823	no	yes	yes	yes
NUP153	P49790	no	yes	no	yes
DHH1	P39517	no	yes	yes	no
MSMEG_1642	A0QSY1	yes	no	no	no
spd-5	P91349	yes	yes	yes	no
DDB_G0280215	Q54VP4	yes	no	no	no
LSM4	P40070	no	yes	yes	no
RV1747	O65934	yes	no	no	no
glh-1	P34689	no	yes	no	no
CPEB4	D8V196	yes	no	yes	no
aqpZ	P60844	no	no	yes	no
SLMA	P0C093	yes	no	yes	no
NCK1	P16333	yes	yes	yes	yes
DDX1	Q92499	no	yes	no	yes
MID1	P78953	yes	no	yes	no
LAT	O43561	yes	yes	yes	yes
HNRNPH3	P31942	no	yes	yes	yes
AGOS_ABL158C	Q75E28	yes	no	yes	no
ZNF207	O43670	no	yes	no	yes
TNRC6B	Q9UPQ9	yes	yes	no	yes
Shank3	Q4ACU6	no	yes	yes	no
CBX2	Q14781	yes	yes	yes	yes
SUMO3	P55854	no	yes	yes	yes
PBP1	P53297	yes	yes	yes	no
n/a	B1MUE7	no	no	yes	no
n/a	B1MUE9	no	no	yes	no
HNRNPA0	Q13151	no	yes	yes	yes
BUC	H0WFA5	yes	no	no	no
GAL11	P19659	no	no	yes	no
robo2	M9PC46	no	no	yes	no
YTHDF3	Q7Z739	yes	no	no	yes
Crygd	P10067	no	no	yes	no
EWSR1	Q01844	yes	yes	yes	yes
GCN4	P03069	no	no	yes	no
MUT-16	O62011	yes	no	no	no
Wasl	O08816	no	yes	yes	no
ESR1	P03372	yes	no	yes	yes
NUP98B	F4ID16	no	yes	no	no
NSP1	P14907	yes	yes	no	no
Sqstm1	Q64337	no	yes	no	no
UBQLN2	Q9UHD9	yes	yes	yes	yes
NONO	Q15233	yes	no	no	yes
RIMBP2	Q9JIR1	yes	no	yes	no
nup98	J7I6Y1	no	yes	no	no
P	P22363	yes	no	no	no
cbbS-2	B7JB29	no	no	yes	no
cbbL	P00880	no	no	yes	no
SURF6	O75683	no	yes	yes	yes
SUP35	P05453	yes	yes	yes	no
SOX2	P48431	no	no	yes	yes
UL80	P16753	no	no	yes	no
RBCS-1	P00873	yes	yes	yes	no
LCP2	Q13094	no	no	yes	yes
FMR1	Q06787	yes	yes	yes	yes
NPHS1	O60500	yes	yes	yes	yes
MYC	P01106	no	no	yes	yes
HNRNPH1	P31943	no	yes	yes	yes
PSPC1	Q8WXF1	no	yes	yes	yes
DDX4	Q9NQI0	yes	yes	yes	yes
TP53	P04637	no	yes	no	yes
Dlgap1	Q9D415	no	yes	yes	no
HNRNPAB	D6RBZ0	no	no	yes	yes
RBFOX1	Q9NWB1	no	yes	no	yes
NUP116	Q02630	no	yes	no	no
CGAS	Q8N884	yes	yes	yes	yes
N	P35972	yes	no	no	no
YTHDF2	Q9Y5A9	yes	no	no	yes
Cttn	Q60598	yes	yes	yes	no
COIL	P38432	no	yes	no	yes
NUP98	P52948	yes	yes	no	yes
cbbS	P04716	no	no	yes	no
Homer1	Q9Z214	no	no	yes	no
RNE	Q9A749	yes	no	yes	no
sup35	O74718	yes	yes	yes	no
pon	Q9W4I7	yes	yes	yes	no
KHDRBS1	Q07666	yes	no	no	yes
KPNA2	P52292	no	yes	no	yes
RPO21	P04050	yes	yes	yes	no
ABL1	P00519	no	yes	yes	yes
STD1	Q02794	yes	no	no	no
Su(var)205	P05205	yes	yes	yes	no
TIF4632	P39936	yes	yes	yes	no
Surf6	P70279	no	yes	no	no
Gphn	Q03555	no	no	yes	no
SYN2	Q92777	yes	yes	yes	yes
Dvl2	Q60838	no	yes	no	no
WASL	O00401	yes	yes	no	yes
AGO2	Q9UKV8	yes	yes	no	yes
P	P03520	yes	no	no	no
KPNB1	Q14974	no	yes	no	yes
P/V	P35974	yes	no	no	no
VHL	P40337	no	no	yes	yes
TDRD6	F1R237	yes	no	no	no
SYNGAP1	Q96PV0	no	yes	no	yes
nup153	K9ZRR1	no	yes	no	no
RIMS1	Q9JIR4	yes	no	yes	no
HNRNPA3	P51991	no	yes	yes	yes
SFPQ	P23246	yes	no	no	yes
Tia1	P52912	no	yes	yes	no
Y66H1A.4	Q9TYK1	no	yes	yes	no
SYN1	P17600	yes	yes	yes	yes
MAPT	P10636	no	yes	yes	yes
PIT	Q9VD51	yes	no	no	no
DAZAP1	Q96EP5	no	yes	yes	yes
meg-3	Q9TXM1	yes	yes	yes	no
DAXX	Q9UER7	yes	yes	yes	yes
SRSF2	Q01130	no	yes	no	yes
osk	P25158	no	no	no	no
C9orf72	Q96LT7	no	yes	no	yes
WHI3	P34761	no	yes	no	no
PML	P29590	no	yes	no	yes
LCI5	Q94ET8	yes	no	no	no
NANOG	Q9H9S0	no	no	yes	yes
edc3	O94752	yes	yes	yes	no
fib-1	Q22053	yes	yes	yes	no
SEC23	Q9VNF8	yes	no	no	no
NPM1	P06748	yes	yes	yes	yes
TIA1	P31483	yes	yes	yes	yes
pgl-1	Q9TZQ3	no	yes	yes	no
CIRBP	Q14011	no	yes	no	yes
UBC	P0CG48	no	no	yes	yes
CHLRE_10g436550v5	A0A2K3DA85	no	no	yes	no
n/a	B1MUE1	no	no	yes	no
HSPB2	Q16082	yes	no	no	yes
RBFOX1	Q7YU08	yes	no	no	no
numb	P16554	yes	yes	yes	no
DDX3X	O00571	yes	yes	yes	yes
SERPINB14	P01012	no	yes	yes	no
BRD4	O60885	yes	yes	yes	yes
laf-1	D0PV95	yes	yes	yes	no
SPAC13A11.06	Q09737	yes	yes	yes	no
n/a	P18573	no	no	yes	no
G3BP1	Q13283	no	yes	no	yes
tiar-2	Q9U2F5	yes	yes	no	no
ELAVL1	Q15717	no	yes	no	yes
zyg-9	G5EEM5	no	yes	no	no
TPXL-1	G5EDE7	no	yes	no	no
MATR3	P43243	yes	no	no	yes
RPL5	P46777	no	yes	yes	yes
GFP	P42212	no	no	yes	no
CPEB2	Q7Z5Q1	no	yes	no	yes
ZFP36L1	Q07352	yes	no	no	yes
PIAS2	O75928	no	yes	yes	yes
N	Q8JXF6	yes	no	no	no
PAT1	P25644	no	yes	no	no
L	P03523	yes	no	no	no
epg-2	Q95XR4	no	yes	no	no
CSTF2	P33240	no	yes	yes	yes
POLR2A	P24928	yes	yes	yes	yes
TBPH	Q8SXP8	no	yes	no	no
U2AF2	P26368	yes	no	no	yes
PTBP1	P26599	no	yes	yes	yes
GRAP2	O75791	no	no	yes	yes
HNRNPA2B1	P22626	no	yes	yes	yes
cbh1	P62694	no	no	yes	no
SEC16	Q5BI67	yes	no	no	no
pgl-3	G5EBV6	yes	yes	yes	no
VRN1	Q8L3W1	yes	yes	yes	no
ZNF207	Q7ZXV8	yes	no	yes	no
TIAL1	Q01085	no	yes	yes	yes
MED1	Q15648	yes	yes	yes	yes
Syngap1	F6SEU4	no	yes	no	no
SPAC20G4.08	O13892	no	yes	no	no
PUB1	P32588	yes	yes	yes	no
MAP1LC3B	Q9GZQ8	no	yes	no	yes
n/a	B1MUE4	no	no	yes	no
NOPP140	Q7KTV5	yes	no	no	no
NAB3	P38996	yes	no	no	no
DYRK1A	Q13627	yes	yes	yes	yes
Nup98-96	Q9VCH5	no	yes	no	no
Srgap1	Q91Z69	no	no	yes	no
npm1	P07222	no	no	yes	no
sepa-1	G5EC37	no	yes	no	no
YTHDF1	Q9BYJ9	yes	no	no	yes
FYN	P06241	no	yes	no	yes
Dlg4	Q62108	no	yes	no	no
SPOP	O43791	yes	yes	yes	yes
AT1G09320	Q500V5	yes	no	no	no
SOVF_195660	Q41372	no	no	yes	no
CDC19	P00549	no	yes	no	no
SYNGAP1	J3QQ18	yes	no	yes	no
Npm1	Q61937	no	yes	no	no
FIB	Q9W1V3	yes	no	no	no
SGO1	Q5FBB7	no	yes	no	yes
MORC3	Q14149	yes	no	no	yes
SOS1	Q07889	yes	yes	yes	yes
ELN	P04985	no	no	yes	no
CBX5	P45973	yes	yes	yes	yes
FS(1)YB	Q9W4W2	yes	no	no	no
GRB2	P62993	yes	yes	yes	yes
PRNP	P04156	yes	no	yes	yes
CRYGD	P07320	no	no	yes	yes
cbbL1	B7JB30	no	no	yes	no
ITSN1	Q15811	no	yes	yes	yes
bop	P02945	no	no	yes	no
Dlg4	P31016	no	yes	no	no
HOMER3	Q9NSC5	no	yes	yes	yes
GATA2	P23769	no	no	yes	yes
FBN1	P35555	no	no	yes	yes
AXIN	O15169	no	yes	no	yes
ccmM	Q03513	no	no	yes	no
fus	Q9BJZ5	no	yes	no	no
Atx2	Q8SWR8	yes	yes	yes	no
spd-2	P91870	no	no	yes	no
SQSTM1	Q13501	yes	yes	yes	yes
APP	P05067	yes	yes	yes	yes
FUS	P35637	yes	yes	yes	yes
n/a	B1MUE8	no	no	yes	no
NUP100	Q02629	yes	yes	no	no
RPL23A	P62750	no	yes	yes	yes
CSTF2T	Q9H0L4	no	yes	yes	yes
FTSZ	P0A9A6	yes	no	yes	no
RBM3	P98179	no	yes	no	yes
HNRNPD	Q14103	yes	yes	yes	yes
HBP-2	A0A0G2UHG9	no	no	yes	no
N	P03521	yes	no	no	no
Syngap1	Q9QUH6	no	yes	no	no
TARDBP	Q13148	yes	yes	yes	yes
XPO1	O14980	no	yes	no	yes
dcp2	O13828	yes	yes	yes	no
DYRK3	O43781	yes	no	no	yes
GATA3	P23771	yes	no	no	yes
dcp1	Q9P805	no	yes	yes	no
npp-10	G5EEH9	no	yes	no	no
SEC24AB	A1Z813	yes	no	no	no
MIP6	P38760	no	yes	no	no
DLG4	P78352	no	yes	yes	yes
HBP-1	A0A0G2UMW8	no	no	yes	no
HNRNPA1	P09651	yes	yes	yes	yes
TP53BP1	Q12888	yes	no	no	yes
CCNT1	O60563	yes	yes	yes	yes
H11L_CHICK	P08287	yes	no	yes	no
TAF15	Q92804	yes	yes	yes	yes
ELN	P15502	yes	yes	yes	yes
RBM14	Q96PK6	yes	yes	no	yes
LYZ	P00698	no	yes	yes	no
CPEB3	Q8NE35	yes	no	no	yes
HNRNPDL	O14979	no	yes	yes	yes
alpha hlyA	E1UZH7	no	no	yes	no
HNRNPH2	P55795	no	yes	yes	yes
EN2	P19622	no	no	yes	yes
HTR1A	P08908	no	no	yes	yes

## Sheet: Supplementary table 2
Table S2: List of 89 confident human LLPS drivers derived from the different resources (depicted in Figure 2C).
Group	Gene name	UniProt AC	PhaSePro	DrLLPS	LLPSDB	In vitro verified?
LLPS driver	NCK1	P16333	yes	yes	yes	yes
LLPS driver	GRB2	P62993	yes	yes	yes	yes
LLPS driver	EWSR1	Q01844	yes	yes	yes	yes
LLPS driver	PTBP1	P26599	no	yes	yes	yes
LLPS driver	RPL5	P46777	no	yes	yes	yes
LLPS driver	UBQLN2	Q9UHD9	yes	yes	yes	yes
LLPS driver	SOX2	P48431	no	no	yes	yes
LLPS driver	AR	P10275	no	no	yes	yes
LLPS driver	LCP2	Q13094	no	no	yes	yes
LLPS driver	SYN2	Q92777	yes	yes	yes	yes
LLPS driver	GRAP2	O75791	no	no	yes	yes
LLPS driver	NPM1	P06748	yes	yes	yes	yes
LLPS driver	LAT	O43561	yes	yes	yes	yes
LLPS driver	HNRNPH1	P31943	no	yes	yes	yes
LLPS driver	CSTF2	P33240	no	yes	yes	yes
LLPS driver	NPHS1	O60500	yes	yes	yes	yes
LLPS driver	MED1	Q15648	yes	yes	yes	yes
LLPS driver	FMR1	Q06787	yes	yes	yes	yes
LLPS driver	SQSTM1	Q13501	yes	yes	yes	yes
LLPS driver	BRD4	O60885	yes	yes	yes	yes
LLPS driver	HNRNPDL	O14979	no	yes	yes	yes
LLPS driver	DDX4	Q9NQI0	yes	yes	yes	yes
LLPS driver	MYC	P01106	no	no	yes	yes
LLPS driver	HNRNPA2B1	P22626	no	yes	yes	yes
LLPS driver	VHL	P40337	no	no	yes	yes
LLPS driver	CCNT1	O60563	yes	yes	yes	yes
LLPS driver	DLG4	P78352	no	yes	yes	yes
LLPS driver	TIAL1	Q01085	no	yes	yes	yes
LLPS driver	SPOP	O43791	yes	yes	yes	yes
LLPS driver	DYRK1A	Q13627	yes	yes	yes	yes
LLPS driver	FUS	P35637	yes	yes	yes	yes
LLPS driver	GATA2	P23769	no	no	yes	yes
LLPS driver	DAZAP1	Q96EP5	no	yes	yes	yes
LLPS driver	HOMER3	Q9NSC5	no	yes	yes	yes
LLPS driver	TAF15	Q92804	yes	yes	yes	yes
LLPS driver	ELN	P15502	yes	yes	yes	yes
LLPS driver	HNRNPH2	P55795	no	yes	yes	yes
LLPS driver	TIA1	P31483	yes	yes	yes	yes
LLPS driver	ESR1	P03372	yes	no	yes	yes
LLPS driver	UBC	P0CG48	no	no	yes	yes
LLPS driver	HNRNPA3	P51991	no	yes	yes	yes
LLPS driver	TARDBP	Q13148	yes	yes	yes	yes
LLPS driver	CBX5	P45973	yes	yes	yes	yes
LLPS driver	SURF6	O75683	no	yes	yes	yes
LLPS driver	CSTF2T	Q9H0L4	no	yes	yes	yes
LLPS driver	SOS1	Q07889	yes	yes	yes	yes
LLPS driver	RPL23A	P62750	no	yes	yes	yes
LLPS driver	APP	P05067	yes	yes	yes	yes
LLPS driver	HNRNPH3	P31942	no	yes	yes	yes
LLPS driver	MAPT	P10636	no	yes	yes	yes
LLPS driver	CGAS	Q8N884	yes	yes	yes	yes
LLPS driver	SYN1	P17600	yes	yes	yes	yes
LLPS driver	PSPC1	Q8WXF1	no	yes	yes	yes
LLPS driver	GNL2	Q13823	no	yes	yes	yes
LLPS driver	RARA	P10276	no	yes	yes	yes
LLPS driver	CBX2	Q14781	yes	yes	yes	yes
LLPS driver	NANOG	Q9H9S0	no	no	yes	yes
LLPS driver	DDX3X	O00571	yes	yes	yes	yes
LLPS driver	HNRNPA0	Q13151	no	yes	yes	yes
LLPS driver	PRNP	P04156	yes	no	yes	yes
LLPS driver	POLR2A	P24928	yes	yes	yes	yes
LLPS driver	DAXX	Q9UER7	yes	yes	yes	yes
LLPS driver	HNRNPA1	P09651	yes	yes	yes	yes
LLPS driver	U2AF2	P26368	yes	no	no	yes
LLPS driver	AGO2	Q9UKV8	yes	yes	no	yes
LLPS driver	TP53BP1	Q12888	yes	no	no	yes
LLPS driver	RBM14	Q96PK6	yes	yes	no	yes
LLPS driver	NUP153	P49790	no	yes	no	yes
LLPS driver	NUP98	P52948	yes	yes	no	yes
LLPS driver	GATA3	P23771	yes	no	no	yes
LLPS driver	LGALS3	P17931	yes	yes	no	yes
LLPS driver	TNRC6B	Q9UPQ9	yes	yes	no	yes
LLPS driver	SYNGAP1	Q96PV0	no	yes	no	yes
LLPS driver	WASL	O00401	yes	yes	no	yes
LLPS driver	YTHDF3	Q7Z739	yes	no	no	yes
LLPS driver	YTHDF1	Q9BYJ9	yes	no	no	yes
LLPS driver	MORC3	Q14149	yes	no	no	yes
LLPS driver	YTHDF2	Q9Y5A9	yes	no	no	yes
LLPS driver	COIL	P38432	no	yes	no	no
LLPS driver	SRSF2	Q01130	no	yes	no	no
LLPS driver	SFPQ	P23246	yes	no	no	no
LLPS driver	HSPB2	Q16082	yes	no	no	no
LLPS driver	HNRNPD	Q14103	yes	yes	yes	yes
LLPS driver	DDX1	Q92499	no	yes	no	no
LLPS driver	NONO	Q15233	yes	no	no	no
LLPS driver	PML	P29590	no	yes	no	no
LLPS driver	KHDRBS1	Q07666	yes	no	no	no
LLPS driver	ZFP36L1	Q07352	yes	no	no	no
LLPS driver	MATR3	P43243	yes	no	no	no

## Sheet: Supplementary table 3
Table S3: In vitro concentration data with sources and information on the protein constructs.
Gene name	UniProt	LLPSDB Entry ID/PMID	concentration in µM	range	source	Details of the construct if not WT	Remark	table legend
FUS	P35637	LLPS000016	10	-	in vitro	-
FUS	P35637	LLPS000016	10	[4.0, 16.0]	in vitro	-
FUS	P35637	LLPS000016	0.4	-	in vitro	-		Corrected values based on literature curation
FUS	P35637	LLPS000016	5	-	in vitro	-		Source of manually derived data
FUS	P35637	LLPS000019	5	-	in vitro	-
FUS	P35637	LLPS000016	1	-	in vitro	-
FUS	P35637	LLPS000016	2	-	in vitro	-
FUS	P35637	LLPS000016	7.5	-	in vitro	-
FUS	P35637	LLPS000017	5	-	in vitro	-
FUS	P35637	LLPS000020	5	-	in vitro	-
FUS	P35637	LLPS000021	5	-	in vitro	-
FUS	P35637	LLPS000016	7	-	in vitro	-
FUS	P35637	LLPS000016	9	-	in vitro	-
FUS	P35637	LLPS000096	7	-	in vitro	-
FUS	P35637	LLPS000095	7	-	in vitro	-
FUS	P35637	LLPS000095	11	-	in vitro	-
FUS	P35637	LLPS000102	10	-	in vitro	-
FUS	P35637	LLPS000103	4	-	in vitro	-
FUS	P35637	LLPS000020	1.55	[0.1, 3.0]	in vitro	-
FUS	P35637	LLPS000016	1.55	[0.1, 3.0]	in vitro	-
FUS	P35637	LLPS000018	5	-	in vitro	-
FUS	P35637	LLPS000016	20	-	in vitro	-
FUS	P35637	LLPS000016	1	[0.5, 4.0]	in vitro	-	Critical concentration was read from LLPSDB/LLPS000016/PS00001733 phase diagram at 25 mg/ml PEG (instead of averaging).
FUS	P35637	LLPS000016	8	-	in vitro	-
FUS	P35637	LLPS001161	8	-	in vitro	-
FUS	P35637	LLPS001158	8	-	in vitro	-
FUS	P35637	LLPS001162	8	-	in vitro	-
FUS	P35637	LLPS001159	8	-	in vitro	-
FUS	P35637	LLPS001154	8	-	in vitro	-
FUS	P35637	LLPS001155	8	-	in vitro	-
FUS	P35637	LLPS001156	8	-	in vitro	-
FUS	P35637	LLPS001157	8	-	in vitro	-
FUS	P35637	LLPS001186	20	-	in vitro	-
FUS	P35637	LLPS001192	20	-	in vitro	-
FUS	P35637	LLPS000016	3	[1.0, 5.0]	in vitro	-
FUS	P35637	LLPS001189	20	-	in vitro	-
EWSR1	Q01844	LLPS000097	1	-	in vitro	-
EWSR1	Q01844	LLPS000098	1	-	in vitro	-
EWSR1	Q01844	LLPS000837	5	-	in vitro	-
EWSR1	Q01844	LLPS000837	15	-	in vitro	-
EWSR1	Q01844	LLPS000837	2	-	in vitro	-
EWSR1	Q01844	LLPS000838	2	-	in vitro	-
TAF15	Q92804	LLPS000100	1	-	in vitro	-
TAF15	Q92804	LLPS000101	1	-	in vitro	-
TAF15	Q92804	LLPS000842	5	-	in vitro	-
TAF15	Q92804	LLPS000842	1	-	in vitro	-
TAF15	Q92804	LLPS000842	4	-	in vitro	-
TAF15	Q92804	LLPS000843	4	-	in vitro	-
HNRNPA0	Q13151	LLPS000740	5	-	in vitro	-
HNRNPA1	P09651	LLPS000159	5	-	in vitro	-
HNRNPA1	P09651	LLPS000166	100	-	in vitro	-
HNRNPA1	P09651	LLPS000157	100	-	in vitro	-
HNRNPA1	P09651	LLPS000157	500	-	in vitro	-
HNRNPA1	P09651	LLPS000157	300	-	in vitro	-
HNRNPA1	P09651	LLPS000157	140	-	in vitro	-
HNRNPA1	P09651	LLPS000157	155	[10.0,300.0]	in vitro	-
HNRNPA1	P09651	LLPS000157	160	-	in vitro	-
HNRNPA1	P09651	LLPS000157	20	[1.0,100.0]	in vitro	-	Critical concentration was read from LLPSDB/LLPS000157/PS00001311 phase diagram at 150 mM NaCl (instead of averaging).
HNRNPA1	P09651	LLPS000157	50	[40.0,60.0]	in vitro	-
HNRNPA1	P09651	LLPS000157	20	-	in vitro	-
HNRNPA1	P09651	LLPS000183	50	-	in vitro	-
HNRNPA1	P09651	LLPS000159	50	-	in vitro	-
HNRNPA1	P09651	LLPS000161	12.5	-	in vitro	-
HNRNPA1	P09651	LLPS000182	12.5	-	in vitro	-
HNRNPA1	P09651	LLPS000157	12.5	-	in vitro	-
HNRNPA1	P09651	LLPS000182	10	-	in vitro	-
HNRNPA1	P09651	LLPS000157	80	-	in vitro	-
HNRNPA1	P09651	LLPS000160	0.5	[0.05,100.0]	in vitro	-	The 50.025 µM value that was retreived from the averaging was changed to 0.5 µM based on phase diagram with RNA and author statement in the respective publication (PMID:26406374).
HNRNPA1	P09651	LLPS000157	40.5	[13.5,67.5]	in vitro	-
HNRNPA1	P09651	LLPS000180	30	-	in vitro	-
HNRNPA1	P09651	LLPS000177	30	-	in vitro	-
HNRNPA1	P09651	LLPS000181	30	-	in vitro	-
HNRNPA1	P09651	LLPS000159	30	-	in vitro	-
HNRNPA1	P09651	LLPS000179	30	-	in vitro	-
HNRNPA1	P09651	LLPS000178	30	-	in vitro	-
HNRNPA1	P09651	LLPS000157	3300	-	in vitro	-
HNRNPA2B1	P22626	LLPS000716	15	-	in vitro	-
HNRNPA2B1	P22626	LLPS000717	5	-	in vitro	-
HNRNPA3	P51991	LLPS000831	5	-	in vitro	-
HNRNPA3	P51991	LLPS000831	25	-	in vitro	-
HNRNPH1	P31943	LLPS000713	5	-	in vitro	-
HNRNPH2	P55795	LLPS000714	5	-	in vitro	-
HNRNPH3	P31942	LLPS000712	5	-	in vitro	-
HNRNPDL	O14979	LLPS000711	5	-	in vitro	-
CSTF2	P33240	LLPS000715	5	-	in vitro	-
CSTF2T	Q9H0L4	LLPS000732	5	-	in vitro	-
DAZAP1	Q96EP5	LLPS000741	5	-	in vitro	-
PSPC1	Q8WXF1	LLPS000737	5	-	in vitro	-
TIA1	P31483	LLPS000147	5	-	in vitro	-
TIA1	P31483	LLPS000153	7	[0.1, 10.0]	in vitro	-	Critical concentration was read from LLPSDB/LLPS000153/PS00001333 phase diagram in the presence of GP repeat peptide (instead of averaging).
TIA1	P31483	LLPS000154	4	[0.1, 10.0]	in vitro	-	Critical concentration was read from LLPSDB/LLPS000154/PS00001333 phase diagram in the presence of GR repeat peptide (instead of averaging).
TIA1	P31483	LLPS000156	7	[0.1, 10.0]	in vitro	-	Critical concentration was read from LLPSDB/LLPS000154/PS00001333 phase diagram in the presence of PA repeat peptide (instead of averaging).
TIA1	P31483	LLPS000155	4	[0.1, 10.0]	in vitro	-	Critical concentration was read from LLPSDB/LLPS000154/PS00001333 phase diagram in the presence of PR repeat peptide (instead of averaging).
TIA1	P31483	LLPS000147	7.3	[0.0, 8.0]	in vitro	-	Critical concentration was read from LLPSDB/LLPS000147/PS00001413 phase diagram at 30 °C temperature (instead of averaging).
TIA1	P31483	LLPS000147	6.4	[1.0, 7.0]	in vitro	-	Critical concentration was read from LLPSDB/LLPS000147/PS00001413 phase diagram at 30 °C temperature (instead of averaging).
TIAL1	Q01085	LLPS000743	5	-	in vitro	-
TARDBP	Q13148	LLPS000412	2.5	-	in vitro	-
TARDBP	Q13148	LLPS000412	5	-	in vitro	-
TARDBP	Q13148	LLPS000412	10	-	in vitro	-
TARDBP	Q13148	LLPS000413	10	-	in vitro	-
TARDBP	Q13148	LLPS000412	1	[0.5, 10.0]	in vitro	-	Critical concentration was read from LLPSDB/LLPS000412/PS00000446 phase diagram at 150 mM NaCl (instead of averaging).
TARDBP	Q13148	LLPS000412	1	-	in vitro	-
TARDBP	Q13148	LLPS000412	1	[0.5, 5.0]	in vitro	-	Critical concentration was read from LLPSDB/LLPS000412/PS00000449 phase diagram at >50 mM NaCl (instead of averaging).
TARDBP	Q13148	LLPS000414	5	-	in vitro	-
TARDBP	Q13148	LLPS000222	2	-	in vitro	-
TARDBP	Q13148	LLPS000412	0.5	-	in vitro	-
RBM14	Q96PK6	PMID:26283796	1212.27	-	in vitro	Truncate	Applied concentration of ∼40 mg/mL was derived from the Methods section of the respective publication (PMID:26283796) .
FMR1	Q06787	LLPS000459	50	-	in vitro	-
FMR1	Q06787	LLPS000459	50	[50.0, 250.0]	in vitro	-	Protein concentration was retreived from PMID:30765518 Supplementary Figure S1B.
FMR1	Q06787	PMID:30765518	25	-	in vitro	Truncate	Protein concentration was retreived from PMID:30765518 Supplementary Figure S4A.
PTBP1	P26599	LLPS000209	10	-	in vitro	-
PTBP1	P26599	LLPS000197	10	-	in vitro	-
PTBP1	P26599	LLPS000212	10	-	in vitro	-
PTBP1	P26599	LLPS000208	10	-	in vitro	-
PTBP1	P26599	LLPS000206	10	-	in vitro	-
PTBP1	P26599	LLPS000211	10	-	in vitro	-
PTBP1	P26599	LLPS000194	20	-	in vitro	-
PTBP1	P26599	LLPS000195	3.75	[3.75, 6.25]	in vitro	-	Concentration was read from phase diagram in PMID:28924037 Figure 4C.
PTBP1	P26599	LLPS000194	136	-	in vitro	-
U2AF65	P26368	PMID:31271494	1	[1.0,10.0]	in vitro	-	Critical concentration in the presence of 1% PEG was read from Figure 3E of the respective publication (PMID:31271494).
U2AF65	P26368	PMID:31271494	2	[1.0,10.0]	in vitro	-	Critical concentration was read from Figure 3E of the respective publication (PMID:31271494).
YTHDF1	Q9BYJ9	PMID:31388144	5	-	in vitro	Truncate	Applied concentration was derived from respective publication (PMID:31388144) Supplementary Figure S3.
YTHDF1	Q9BYJ9	PMID:31388144	10	-	in vitro	Truncate	Applied concentration was derived from respective publication (PMID:31388144) Figure 1C.
YTHDF1	Q9BYJ9	PMID:31388144	15	-	in vitro	Truncate	Applied concentration was derived from respective publication (PMID:31388144) Figure 1B.
YTHDF2	Q9Y5A9	PMID:31388144	5	-	in vitro	Truncate	Applied concentration was derived from respective publication (PMID:31388144) Supplementary Figure S3.
YTHDF2	Q9Y5A9	PMID:31388144	10	-	in vitro	Truncate	Applied concentration was derived from respective publication (PMID:31388144) Figure 1C.
YTHDF2	Q9Y5A9	PMID:31388144	15	-	in vitro	Truncate	Applied concentration was derived from respective publication (PMID:31388144) Figure 1B.
YTHDF2	Q9Y5A9	PMID:31292544	4	-	in vitro	-	Applied concentration was derived from respective publication (PMID:31292544) Figure 1C at 100 and 200 mM NaCl.
YTHDF3	Q7Z739	PMID:31388144	5	-	in vitro	Truncate	Applied concentration was derived from respective publication (PMID:31388144) Supplementary Figure S3.
YTHDF3	Q7Z739	PMID:31388144	10	-	in vitro	Truncate	Applied concentration was derived from respective publication (PMID:31388144) Figure 1C.
YTHDF3	Q7Z739	PMID:31388144	15	-	in vitro	Truncate	Applied concentration was derived from respective publication (PMID:31388144) Figure 1B.
DDX3X	O00571	LLPS001088	100	-	in vitro	Truncate
DDX3X	O00571	LLPS001088	150	-	in vitro	Truncate
DDX3X	O00571	LLPS001089	100	-	in vitro	Truncate
DDX3X	O00571	PMID:30531905	0.25	[0.0, 1.0]	in vitro	Truncate	Protein concentration was read from (PMID:30531905) Figure S13C phase diagram with turbidity measurement in the presence of 200 mM NaCl and 10% PEG.
DDX3X	O00571	PMID:30531905	0.5	[0.0, 1.0]	in vitro	Truncate	Protein concentration was read from (PMID:30531905) Figure S13D phase diagram with turbidity measurement in the presence of 200 mM NaCl and 10% PEG.
DDX4	Q9NQI0	LLPS000217	100	-	in vitro	Truncate
DDX4	Q9NQI0	LLPS000217	202	-	in vitro	Truncate
DDX4	Q9NQI0	LLPS000217	11	[0.0, 350.0]	in vitro	Truncate	Critical concentration was read from LLPSDB/LLPS000217/PS00001252 phase diagram at 29 °C temperature and 100 mM NaCl (instead of averaging).
DDX4	Q9NQI0	LLPS000217	54	[0.0, 200.0]	in vitro	Truncate	Critical concentration was read from LLPSDB/LLPS000217/PS00001253 phase diagram at 37 °C temperature (instead of averaging).
DDX4	Q9NQI0	LLPS000220	162.5	-	in vitro	Truncate
DDX4	Q9NQI0	LLPS000221	162.5	-	in vitro	Truncate
DDX4	Q9NQI0	LLPS000217	7864.75	[0.0,15729.4905]	in vitro	Truncate
DDX4	Q9NQI0	LLPS000217	78.6475	-	in vitro	Truncate
DDX4	Q9NQI0	LLPS000217	30	-	in vitro	Truncate
POLR2A	P24928	LLPS000093	50	-	in vitro	Truncate
POLR2A	P24928	LLPS000691	20	-	in vitro	Truncate
POLR2A	P24928	LLPS000691	5	-	in vitro	Truncate
POLR2A	P24928	LLPS000691	10	-	in vitro	Truncate
POLR2A	P24928	LLPS000695	20	-	in vitro	Truncate
POLR2A	P24928	LLPS000872	0.5	-	in vitro	Truncate
POLR2A	P24928	LLPS000687	31.1415	-	in vitro	Truncate
POLR2A	P24928	LLPS000688	31.1415	-	in vitro	Truncate, phosphorylated by Cyclin-T1
MED1	Q15648	LLPS000745	20	-	in vitro	Truncate
MED1	Q15648	LLPS000745	0.625	[0.625, 20.0]	in vitro	Truncate	Protein concentration was retreived from PMID:29930091 Supplementary Figure S6.
MED1	Q15648	LLPS000745	10	-	in vitro	Truncate
MED1	Q15648	LLPS000749	10	-	in vitro	Truncate
MED1	Q15648	LLPS000748	10	-	in vitro	Truncate
MED1	Q15648	LLPS000745	10	[10.0, 40.0]	in vitro	Truncate	Protein concentration was retreived from PMID: 30449618 Figure 3B.
MED1	Q15648	LLPS000996	10	-	in vitro	Truncate
MED1	Q15648	LLPS000997	10	-	in vitro	Truncate
MED1	Q15648	LLPS000998	10	-	in vitro	Truncate
MED1	Q15648	LLPS001002	10	-	in vitro	Truncate
MED1	Q15648	LLPS001004	10	-	in vitro	Truncate
MED1	Q15648	LLPS001006	10	-	in vitro	Truncate
MED1	Q15648	LLPS001008	10	-	in vitro	Truncate
MED1	Q15648	LLPS001010	10	-	in vitro	Truncate
MED1	Q15648	LLPS001012	10	-	in vitro	Truncate
MED1	Q15648	LLPS001014	10	-	in vitro	Truncate
MED1	Q15648	LLPS000747	10	[10.0, 40.0]	in vitro	Truncate	Protein concentration was retreived from PMID: 30449618 Figure 6C.
MED1	Q15648	LLPS001015	10	-	in vitro	Truncate
BRD4	O60885	LLPS000744	20	-	in vitro	Truncate
BRD4	O60885	LLPS000744	0.625	[0.625, 20.0]	in vitro	Truncate	Protein concentration was retreived from PMID:29930091 Supplementary Figure S6.
BRD4	O60885	LLPS000744	10	-	in vitro	Truncate
BRD4	O60885	LLPS000749	10	-	in vitro	Truncate
MYC	P01106	LLPS001001	12	-	in vitro	-
MYC	P01106	LLPS001002	10	-	in vitro	-
SOX2	P48431	LLPS001007	40	-	in vitro	-
SOX2	P48431	LLPS001008	10	-	in vitro	-
GATA2	P23769	LLPS001011	40	-	in vitro	-
GATA2	P23769	LLPS001012	10	-	in vitro	-
GATA3	P23771	PMID:30833784	7	-	in vitro	-	Applied concentration was derived from Figure S2 of the respective publication (PMID:30833784) .
RARA	P10276	LLPS001009	40	-	in vitro	-
RARA	P10276	LLPS001010	10	-	in vitro	-
NANOG	Q9H9S0	LLPS001005	10	-	in vitro	-
NANOG	Q9H9S0	LLPS001006	10	-	in vitro	-
ESR1	P03372	LLPS001013	40	-	in vitro	-
ESR1	P03372	LLPS001014	10	-	in vitro	-
ESR1	P03372	LLPS001015	10	-	in vitro	-
ESR1	P03372	PMID:30833784	7	-	in vitro	-	Applied concentration was derived from Figure S2 of the respective publication (PMID:30833784) .
NPM1	P06748	LLPS000323	7	[4.0, 10.0]	in vitro	-
NPM1	P06748	LLPS000328	2	[0.0, 8.0]	in vitro	-	Critical concentration was read from LLPSDB/LLPS000328/PS00000330 phase diagram at 150 mM NaCl in the presence of rRNA (instead of averaging).
NPM1	P06748	LLPS000364	40	-	in vitro	-
NPM1	P06748	LLPS000365	10	-	in vitro	-
NPM1	P06748	LLPS000328	30	[10.0, 50.0]	in vitro	-
NPM1	P06748	LLPS000324	2	-	in vitro	-
NPM1	P06748	LLPS000324	20	-	in vitro	-
NPM1	P06748	LLPS000327	10	-	in vitro	-
NPM1	P06748	LLPS000376	20	-	in vitro	-
NPM1	P06748	LLPS000376	2.5	[1.0, 11.0]	in vitro	-	Critical concentration was read from LLPSDB/LLPS000376/PS00000359 phase diagram at 10 µM SURF6 N (instead of averaging).
NPM1	P06748	LLPS000377	0.5	[0.0, 10.0]	in vitro	-	Critical concentration was read from LLPSDB/LLPS000377/PS00001197 phase diagram at 1 µM SURF6 N (instead of averaging).
NPM1	P06748	LLPS000377	5	-	in vitro	-
NPM1	P06748	LLPS000375	15	[0.0, 30.0]	in vitro	-
NPM1	P06748	LLPS000373	15	[0.0, 30.0]	in vitro	-
NPM1	P06748	LLPS000326	15	-	in vitro	-
RPL5	P46777	LLPS000364	120	-	in vitro	Truncate
RPL5	P46777	LLPS000365	200	-	in vitro	Truncate
RPL5	P46777	LLPS000365	50	-	in vitro	Truncate
RPL5	P46777	LLPS000367	200	[0.0, 400.0]	in vitro	Truncate	Critical concentration was read from LLPSDB/LLPS000367/PS00000341 phase diagram.
RPL5	P46777	LLPS000367	600	-	in vitro	Truncate
RPL5	P46777	LLPS000370	160	-	in vitro	Truncate
RPL5	P46777	LLPS000372	200	-	in vitro	Truncate
RPL23A	P62750	LLPS000387	40	[0.0, 400.0]	in vitro	Truncate	Critical concentration was read from LLPSDB/LLPS000387/PS00000340 phase diagram at 5 µM NPM1 (instead of averaging).
SURF6	O75683	LLPS000378	60	[0.0, 400.0]	in vitro	-	Critical concentration was read from LLPSDB/LLPS000378/PS00000345 phase diagram at 5 µM NPM1 N130 (instead of averaging).
SURF6	O75683	LLPS000376	20	-	in vitro	-
SURF6	O75683	LLPS000376	7.5	[1.0, 100.0]	in vitro	-	Critical concentration was read from LLPSDB/LLPS000376/PS00000359 phase diagram at 5 µM NPM1 (instead of averaging).
SURF6	O75683	LLPS000376	11	-	in vitro	-
SURF6	O75683	LLPS000379	10	[1.0, 100.0]	in vitro	-	Critical concentration was read from LLPSDB/LLPS000379/PS00000363 phase diagram at 2.5 µM NPM1 N188 (instead of averaging).
SURF6	O75683	LLPS000379	20	-	in vitro	-
SURF6	O75683	LLPS000380	10	[1.0, 100.0]	in vitro	-	Critical concentration was read from LLPSDB/LLPS000380/PS00000366 phase diagram at 2.5 µM NPM1 N240 (instead of averaging).
SURF6	O75683	LLPS000380	20	-	in vitro	-
SURF6	O75683	LLPS000382	11	-	in vitro	-
SURF6	O75683	LLPS000383	50	-	in vitro	-
SURF6	O75683	LLPS000377	0.5	[0.0, 10.0]	in vitro	-	Critical concentration was read from LLPSDB/LLPS000377/PS00001197 phase diagram at 1 µM NPM1 (instead of averaging).
SURF6	O75683	LLPS000377	10	[0.0, 20.0]	in vitro	-
SURF6	O75683	LLPS000384	20	[0.0, 40.0]	in vitro	-
SURF6	O75683	LLPS000386	20	[0.0, 40.0]	in vitro	-
SURF6	O75683	LLPS000375	30	[0.0, 60.0]	in vitro	-	Critical concentration was read from LLPSDB/LLPS000375/PS00002064 phase diagram at 15 µM NPM1 (instead of averaging).
SURF6	O75683	LLPS000385	15	-	in vitro	-
GNL2	Q13823	LLPS000374	200	[0.0, 400.0]	in vitro	Truncate
GNL2	Q13823	LLPS000373	20	[0.0, 60.0]	in vitro	Truncate	Critical concentration was read from LLPSDB/LLPS000373/PS00002065 phase diagram at 10 µM NPM1 (instead of averaging).
CBX2	Q14781	LLPS001021	2.4	[2.4, 12.0]	in vitro	-	Critical concentration was read from Figure 2D of the respective article (PMID:30514760).
CBX2	Q14781	LLPS001022	4.8	-	in vitro	-
CBX2	Q14781	LLPS001021	4.8	-	in vitro	-
CBX5	P45973	LLPS000520	400	-	in vitro	-
CBX5	P45973	PMID:28636604	200	-	in vitro	N-terminally phosphorylated WT protein (on S11-S14)	Critical concentration was read from graph in Figure 1D of the respective article (PMID:28636604).
CGAS	Q8N884	LLPS000750	10	-	in vitro	-
CGAS	Q8N884	LLPS000750	5	-	in vitro	-
CGAS	Q8N884	LLPS000750	0.5005	[0.001, 1.0]	in vitro	-
CGAS	Q8N884	LLPS000751	10	-	in vitro	-
CGAS	Q8N884	LLPS000752	10	-	in vitro	-
CGAS	Q8N884	LLPS000753	10	-	in vitro	-
CGAS	Q8N884	LLPS000754	10	-	in vitro	-
CGAS	Q8N884	LLPS000755	5	-	in vitro	-
CGAS	Q8N884	LLPS000756	0.5005	[0.001, 1.0]	in vitro	-
CGAS	Q8N884	LLPS000756	10	-	in vitro	-
CGAS	Q8N884	LLPS000756	5	-	in vitro	-
CGAS	Q8N884	LLPS000756	20	-	in vitro	-
CGAS	Q8N884	LLPS000756	0.0025	[0.0025, 0.05]	in vitro	-	The 0.02625 µM value that was retreived from the averaging was changed to 2.5 nM based on author statement in PMID: 29976794.
MORC3	Q14149	PMID:31284181	13.3	-	in vitro	Truncate	Applied concentration was derived from the respective publication (PMID:31284181) Figure 3.
TP53BP1	Q12888	PMID:31267591	1.66	-	in vitro	Truncate	Applied concentration was derived from the Methods section of respective publication (PMID:31267591).
NPHS1	O60500	LLPS000261	3	-	in vitro	Truncate and mutations of 2x(Y to F), LCK phosphorylated
NPHS1	O60500	LLPS000261	7.5	-	in vitro	Truncate and mutations of 2x(Y to F), LCK phosphorylated
NPHS1	O60500	LLPS000272	7.5	-	in vitro	Truncate and mutations of 2x(Y to F), LCK phosphorylated
NPHS1	O60500	LLPS000273	7.5	-	in vitro	Truncate and mutations of 2x(Y to F), LCK phosphorylated
NPHS1	O60500	LLPS000264	7.5	-	in vitro	Truncate and mutations of 2x(Y to F), LCK phosphorylated
NPHS1	O60500	LLPS000271	7.5	-	in vitro	Truncate and mutations of 2x(Y to F), LCK phosphorylated
NPHS1	O60500	LLPS000265	7.5	-	in vitro	Truncate and mutations of 2x(Y to F), LCK phosphorylated
NPHS1	O60500	LLPS000266	7.5	-	in vitro	Truncate and mutations of 2x(Y to F), LCK phosphorylated
NPHS1	O60500	LLPS000267	7.5	-	in vitro	Truncate and mutations of 2x(Y to F), LCK phosphorylated
NPHS1	O60500	LLPS000278	7.5	-	in vitro	Truncate and mutations of 2x(Y to F), LCK phosphorylated
NPHS1	O60500	LLPS000277	7.5	-	in vitro	Truncate and mutations of 2x(Y to F), LCK phosphorylated
NPHS1	O60500	LLPS000276	7.5	-	in vitro	Truncate and mutations of 2x(Y to F), LCK phosphorylated
NPHS1	O60500	LLPS000568	4.5	-	in vitro	Truncate and mutations of 2x(Y to F)
NPHS1	O60500	LLPS000568	3	-	in vitro	Truncate and mutations of 2x(Y to F)
NPHS1	O60500	LLPS000275	0.01	-	in vitro	Truncate and mutations of 2x(Y to F)
NCK1	P16333	LLPS000624	0.5	-	in vitro	-
NCK1	P16333	LLPS000261	10	-	in vitro	-
NCK1	P16333	LLPS000261	10	[0.0, 50.0]	in vitro	-	Critical concentration was read from LLPSDB/LLPS000261/PS00001338 phase diagram.
NCK1	P16333	LLPS000258	50	[0.0, 100.0]	in vitro	-	Critical concentration was read from LLPSDB/LLPS000258/PS00001355 phase diagram in the presence of 50 µM N-WASP.
WASL	O00401	PMID:26553976	50	[0.0,100.0]	in vitro	Truncate	Critical concentration was derived from the phase diagram of the respective publication (PMID:26553976).
WASL	O00401	PMID:26553976	15	[5.0,40.0]	in vitro	Truncate	Critical concentration was derived from the phase diagram of the respective publication (PMID:22398450).
WASL	O00401	PMID:30846599	0.05	-	in vitro	Truncate	Applied concentration was derived from respective publication (PMID:30846599).
WASL	O00401	PMID:30846599	0.1	-	in vitro	Truncate	Applied concentration was derived from respective publication (PMID:30846599).
WASL	O00401	PMID:30846599	0.125	-	in vitro	Truncate	Applied concentration was derived from respective publication (PMID:30846599).
WASL	O00401	PMID:30846599	0.25	-	in vitro	Truncate	Applied concentration was derived from respective publication (PMID:30846599).
WASL	O00401	PMID:30846599	0.5	-	in vitro	Truncate	Applied concentration was derived from respective publication (PMID:30846599).
LAT	O43561	LLPS000624	0.003	-	in vitro	Truncate and mutations of 4x(Y to F)
LAT	O43561	LLPS000623	0.003	-	in vitro	Truncate and mutations of 4x(Y to F)
LAT	O43561	LLPS000616	0.01	-	in vitro	Truncate and mutations of 4x(Y to F)
LAT	O43561	LLPS000616	0.003	-	in vitro	Truncate and mutations of 4x(Y to F)
LAT	O43561	LLPS000616	0.000505	[1e-05, 0.001]	in vitro	Truncate and mutations of 4x(Y to F)
LAT	O43561	LLPS000619	0.003	-	in vitro	Truncate and mutations of 5x(Y to F)
LAT	O43561	LLPS000620	0.003	-	in vitro	Truncate and mutations of 5x(Y to F)
LAT	O43561	LLPS000621	0.003	-	in vitro	Truncate and mutations of 5x(Y to F)
LAT	O43561	LLPS000618	0.003	-	in vitro	Truncate and mutations of 6x(Y to F)
LAT	O43561	LLPS000617	0.003	-	in vitro	Truncate and mutations of 4x(Y to F)
GRB2	P62993	LLPS000616	0.5	-	in vitro	WT+ 5 residues N-terminal tag
GRB2	P62993	LLPS000616	0.125	-	in vitro	WT+ 5 residues N-terminal tag
GRB2	P62993	LLPS000615	0.5		in vitro	WT+ 5 residues N-terminal tag
GRB2	P62993	LLPS000619	0.5	[0.0, 1.0]	in vitro	WT+ 5 residues N-terminal tag
GRB2	P62993	LLPS000620	0.5	[0.0, 1.0]	in vitro	WT+ 5 residues N-terminal tag
GRB2	P62993	LLPS000621	0.5	[0.0, 1.0]	in vitro	WT+ 5 residues N-terminal tag
GRB2	P62993	LLPS000618	0.31	[0.125,0.5]	in vitro	WT+ 5 residues N-terminal tag
GRB2	P62993	LLPS000618	2		in vitro	WT+ 5 residues N-terminal tag
GRB2	P62993	LLPS000614	0.31	[0.125,0.5]	in vitro	WT+ 5 residues N-terminal tag
GRB2	P62993	LLPS000614	2		in vitro	WT+ 5 residues N-terminal tag
GRB2	P62993	LLPS000617	0.125	[0.0, 1.0]	in vitro	WT+ 5 residues N-terminal tag	Critical concentration was read from LLPSDB/LLPS000617/PS00001194 phase diagram at 31.25 nM SOS1.
GRB2	P62993	LLPS000776	10	-	in vitro	-
SOS1	Q07889	LLPS000616	0.25	-	in vitro	Truncate
SOS1	Q07889	LLPS000616	0.062	-	in vitro	Truncate
SOS1	Q07889	LLPS000619	0.5	[0.0, 1.0]	in vitro	Truncate
SOS1	Q07889	LLPS000620	0.5	[0.0, 1.0]	in vitro	Truncate
SOS1	Q07889	LLPS000621	0.5	[0.0, 1.0]	in vitro	Truncate
SOS1	Q07889	LLPS000618	0.992	-	in vitro	Truncate
SOS1	Q07889	LLPS000614	0.992	-	in vitro	Truncate
SOS1	Q07889	LLPS000617	0.031	[0.0, 1.0]	in vitro	Truncate	Critical concentration was read from LLPSDB/LLPS000617/PS00001194 phase diagram at 125 nM GRB2 in the presence of LAT fragment (instead of averaging).
GRAP2	O75791	LLPS000624	0.5	-	in vitro	Truncate
GRAP2	O75791	LLPS000623	0.5	-	in vitro	Truncate
LCP2	Q13094	LLPS000624	0.25	-	in vitro	Truncate
LCP2	Q13094	LLPS000623	0.25	-	in vitro	Truncate
SYNGAP1	Q96PV0	PMID:27565345	25	[10.0, 125.0]	in vitro	Truncate	Applied concentration was derived from respective publication (PMID:27565345) Figure 4E.
SYNGAP1	Q96PV0	PMID:27565345	100	-	in vitro	Truncate	Applied concentration was derived from respective publication (PMID:27565345) Figure 4A.
DLG4	P78352	LLPS000401	20	-	in vitro	-
DLG4	P78352	LLPS000401	10	-	in vitro	-
DLG4	P78352	LLPS000401	5	-	in vitro	-
DLG4	P78352	LLPS000402	20	-	in vitro	-
DLG4	P78352	LLPS000402	10	-	in vitro	-
DLG4	P78352	LLPS000402	5	-	in vitro	-
DLG4	P78352	LLPS000398	40	-	in vitro	-
DLG4	P78352	LLPS000398	25	-	in vitro	-
DLG4	P78352	LLPS000399	40	-	in vitro	-
DLG4	P78352	LLPS000399	25	-	in vitro	-
DLG4	P78352	LLPS000400	40	-	in vitro	-
DLG4	P78352	LLPS000400	25	-	in vitro	-
DLG4	P78352	LLPS000402	40	-	in vitro	-
DLG4	P78352	LLPS000402	25	-	in vitro	-
DLG4	P78352	LLPS000400	10	-	in vitro	-
DLG4	P78352	LLPS000399	10	-	in vitro	-
DLG4	P78352	LLPS000400	5	-	in vitro	-
DLG4	P78352	LLPS000402	1	-	in vitro	-
DLG4	P78352	LLPS001112	40	-	in vitro	-
DLG4	P78352	LLPS001112	25	-	in vitro	-
DLG4	P78352	LLPS001112	10	-	in vitro	-
DLG4	P78352	LLPS001112	5	-	in vitro	-
DLG4	P78352	LLPS000402	4	-	in vitro	-
DLG4	P78352	LLPS000405	20	-	in vitro	-
DLG4	P78352	LLPS000409	20	-	in vitro	-
DLG4	P78352	LLPS000411	20	-	in vitro	-
DLG4	P78352	LLPS000404	20	-	in vitro	-
DLG4	P78352	LLPS000403	20	-	in vitro	-
DLG4	P78352	LLPS000410	20	-	in vitro	-
DLG4	P78352	LLPS000406	20	-	in vitro	-
DLG4	P78352	LLPS000407	20	-	in vitro	-
DLG4	P78352	LLPS000408	20	-	in vitro	-
HOMER3	Q9NSC5	LLPS000401	20	-	in vitro	-
HOMER3	Q9NSC5	LLPS000401	10	-	in vitro	-
HOMER3	Q9NSC5	LLPS000401	5	-	in vitro	-
HOMER3	Q9NSC5	LLPS000402	20	-	in vitro	-
HOMER3	Q9NSC5	LLPS000402	10	-	in vitro	-
HOMER3	Q9NSC5	LLPS000402	5	-	in vitro	-
HOMER3	Q9NSC5	LLPS000402	40	-	in vitro	-
HOMER3	Q9NSC5	LLPS000402	25	-	in vitro	-
HOMER3	Q9NSC5	LLPS000402	1	-	in vitro	-
HOMER3	Q9NSC5	LLPS001035	80	-	in vitro	-
HOMER3	Q9NSC5	LLPS001111	40	-	in vitro	-
HOMER3	Q9NSC5	LLPS001111	25	-	in vitro	-
HOMER3	Q9NSC5	LLPS001111	10	-	in vitro	-
HOMER3	Q9NSC5	LLPS001112	40	-	in vitro	-
HOMER3	Q9NSC5	LLPS001112	25	-	in vitro	-
HOMER3	Q9NSC5	LLPS001112	10	-	in vitro	-
HOMER3	Q9NSC5	LLPS001112	5	-	in vitro	-
HOMER3	Q9NSC5	LLPS000402	4	-	in vitro	-
HOMER3	Q9NSC5	LLPS000404	20	-	in vitro	-
HOMER3	Q9NSC5	LLPS000403	20	-	in vitro	-
HOMER3	Q9NSC5	LLPS000406	20	-	in vitro	-
HOMER3	Q9NSC5	LLPS000407	20	-	in vitro	-
HOMER3	Q9NSC5	LLPS000408	20	-	in vitro	-
SYN1	P17600	LLPS000776	10	-	in vitro	-
SYN1	P17600	LLPS000772	0.5	[0.5, 20.0]	in vitro	-	Concentration was read from Figure S2 of the respective article (PMID:29976799).
SYN1	P17600	LLPS000772	0.1	[0.05, 10.0]	in vitro	-	Critical concentration was read from LLPSDB/LLPS000772/PS00000874 phase diagram at 5% PEG (instead of averaging).
SYN1	P17600	LLPS000772	1	-	in vitro	-
SYN1	P17600	LLPS000772	10	-	in vitro	-
SYN1	P17600	LLPS000778	10	-	in vitro	-
SYN1	P17600	LLPS000778	1	-	in vitro	-
SYN1	P17600	LLPS000777	10	-	in vitro	-
SYN2	Q92777	LLPS000777	10	-	in vitro	-
SYN2	Q92777	LLPS000779	10	-	in vitro	-
AGO2	Q9UKV8	PMID:29576456	2.5	[1.25, 40.0]	in vitro	-	Critical concentration was read from phase diagram at room temperature in Figure 3D in the presence of 20 µM TNRC6B ABD region (PMID:29576456).
TNRC6B	Q9UPQ9	PMID:29576456	10	[10.0, 20.0]	in vitro	Truncate	Applied concentration was derived from Figure 3C of the respective publication (PMID:29576456) .
SPOP	O43791	LLPS000884	15	-	in vitro	Truncate
SPOP	O43791	LLPS000884	1	[0.0, 15.0]	in vitro	Truncate	Protein concentration was read from (PMID:30244836) Figure 2A phase diagram in the presence of 5 µM DAXX.
SPOP	O43791	LLPS000890	15	-	in vitro	Truncate
DAXX	Q9UER7	LLPS000884	75	-	in vitro	Truncate
DAXX	Q9UER7	LLPS000888	75	-	in vitro	Truncate
DAXX	Q9UER7	LLPS000884	5	[0.0, 50.0]	in vitro	Truncate	Protein concentration was read from (PMID:30244836) Figure 2A phase diagram in the presence of 1 µM SPOP.
DAXX	Q9UER7	LLPS000889	75	-	in vitro	Truncate
DAXX	Q9UER7	LLPS000891	100	-	in vitro	Truncate
AR	P10275	LLPS000890	70	[40.0, 100.0]	in vitro	Truncate
AR	P10275	LLPS000892	100	-	in vitro	Truncate
UBQLN2	Q9UHD9	LLPS000092	4	-	in vitro	-
UBQLN2	Q9UHD9	LLPS000535	50	-	in vitro	-
UBQLN2	Q9UHD9	LLPS000535	1	[1.0, 10.0]	in vitro	-	The 5.5 µM value that was retreived from the averaging was changed to 1 µM based on author statement in the respective publication (PMID:29526694).
UBQLN2	Q9UHD9	LLPS000535	50	[25.0, 75.0]	in vitro	-
UBQLN2	Q9UHD9	LLPS000562	50	-	in vitro	-
UBQLN2	Q9UHD9	LLPS000563	50	-	in vitro	-
UBQLN2	Q9UHD9	LLPS000560	50	-	in vitro	-
UBQLN2	Q9UHD9	LLPS000561	50	-	in vitro	-
UBQLN2	Q9UHD9	LLPS000558	50	-	in vitro	-
SQSTM1	Q13501	LLPS000698	20	-	in vitro	-
SQSTM1	Q13501	LLPS000699	15	-	in vitro	-
SQSTM1	Q13501	LLPS000699	0.468	[0.0, 30.0]	in vitro	-	Critical concentration was read from LLPSDB/LLPS000699/PS00000833 phase diagram in the presence of 0.125 µM of chains of 6 tandem ubiquitins (instead of averaging).
SQSTM1	Q13501	LLPS000700	15	-	in vitro	-
SQSTM1	Q13501	LLPS000700	0.016	[0.0, 30.0]	in vitro	-	Critical concentration was read from LLPSDB/LLPS000700/PS00000835 phase diagram in the presence of 0.125 µM of chains of 8 tandem ubiquitins (instead of averaging).
SQSTM1	Q13501	LLPS000700	20	-	in vitro	-
SQSTM1	Q13501	LLPS000706	20	-	in vitro	-
UBC	P0CG48	LLPS000562	5	[0.0, 50.0]	in vitro	Ubiquitin chain of 2 units	Critical concentration was read from LLPSDB/LLPS000562/PS00000633 phase diagram in the presence of 50 µM UBQLN2 at 28 °C temperature (instead of averaging).
UBC	P0CG48	LLPS000563	25	[0.0, 50.0]	in vitro	Ubiquitin chain of 3 units
UBC	P0CG48	LLPS000560	12.5	[0.0, 50.0]	in vitro	Single Ubiquitin	Critical concentration was read from LLPSDB/LLPS000560/PS00000635 phase diagram in the presence of 50 µM UBQLN2 at 28 °C temperature (instead of averaging).
UBC	P0CG48	LLPS000698	80	-	in vitro	Ubiquitin chain of 2 units (K63 linked)
UBC	P0CG48	LLPS000697	80	-	in vitro	Single Ubiquitin
UBC	P0CG48	LLPS000699	80	-	in vitro	Ubiquitin chain of 6 units
UBC	P0CG48	LLPS000699	0.125	[0.0, 160.0]	in vitro	Ubiquitin chain of 6 units	Concentration was read from LLPSDB/LLPS000699/PS00000833 phase diagram in the presence of 0.468 µM SQSTM1 (instead of averaging).
UBC	P0CG48	LLPS000700	80	-	in vitro	Ubiquitin chain of 8 units
UBC	P0CG48	LLPS000700	0.125	[0.0, 160.0]	in vitro	Ubiquitin chain of 8 units	Concentration was read from LLPSDB/LLPS0007009/PS00000835 phase diagram in the presence of 0.016 µM SQSTM1 (instead of averaging).
UBC	P0CG48	LLPS000700	5	-	in vitro	Ubiquitin chain of 8 units
UBC	P0CG48	LLPS000706	5	-	in vitro	Ubiquitin chain of 8 units
CCNT1	O60563	LLPS000687	144.315	-	in vitro	Truncate
CCNT1	O60563	LLPS000688	144.315	-	in vitro	Truncate
CCNT1	O60563	LLPS000684	288.63	-	in vitro	Truncate
DYRK1A	Q13627	LLPS000689	239.006	-	in vitro	Truncate
NUP98	P52948	PMID:25562883	5	-	in vitro	Truncate	Applied concentration was derived from Figure 6 of the respective publication (PMID:25562883) .
NUP153	P49790	PMID:21961597	3282.6	-	in vitro	Truncate	Applied concentration of ∼200 mg/mL was derived from the Methods section of the respective publication (PMID:21961597) .
MAPT	P10636	LLPS000492	11.25	[2.5, 20.0]	in vitro	-
MAPT	P10636	LLPS000492	30	-	in vitro	-
MAPT	P10636	LLPS000492	20	-	in vitro	-
MAPT	P10636	LLPS000492	25	-	in vitro	-
MAPT	P10636	LLPS000492	18	-	in vitro	-
MAPT	P10636	LLPS000493	25	-	in vitro	-
MAPT	P10636	LLPS000494	25	-	in vitro	-
MAPT	P10636	LLPS000495	25	-	in vitro	-
MAPT	P10636	LLPS000492	5	-	in vitro	-
MAPT	P10636	LLPS000492	1	[0.0, 10.0]	in vitro	-	Critical concentration was read from LLPSDB/LLPS000492/PS00002057 phase diagram in the presence of 10% PEG.
MAPT	P10636	LLPS000492	10	-	in vitro	-
MAPT	P10636	LLPS000492	2	-	in vitro	-
PRNP	P04156	LLPS000875	30	-	in vitro	Truncate
PRNP	P04156	LLPS000875	5	[0.2, 40.0]	in vitro	Truncate	Critical concentration was read from LLPSDB/LLPS000875/PS00001231 phase diagram at 10% PEG (instead of averaging).
PRNP	P04156	PMID:30401430	0.4		in vitro	Truncate	The authors of the respective publication (PMID:30401430) used 400 nM PrPC in the experiments where hydrogel formation with Aβ was investigated (these were not present in LLPSDB.)
PRNP	P04156	LLPS000875	26	[5.0, 40.0]	in vitro	Truncate	Critical concentration was read from LLPSDB/LLPS000875/PS00001232 phase diagram at 125 mM NaCl (instead of averaging).
APP	P05067	LLPS000963	25	-	in vitro	Truncate
APP	P05067	PMID:30401430	0.003		in vitro	Truncate	The authors of the respective publication (PMID:30401430) used 3 nM Aβ peptide in the experiments where hydrogel formation with PrPC was investigated (these were not present in LLPSDB.)
APP	P05067	LLPS000962	25	-	in vitro	Truncate
VHL	P40337	LLPS000958	25	-	in vitro	Truncate
VHL	P40337	LLPS000957	25	-	in vitro	Truncate
LGALS3	P17931	PMID:28893908	400	-	in vitro	Truncate	Applied concentration in the presence of 300 mM NaCl was derived from Figure S7 of the respective publication (PMID:28893908) .
ELN	P15502	LLPS001124	100	-	in vitro	-
ELN	P15502	LLPS001127	100	-	in vitro	-
ELN	P15502	LLPS001126	100	-	in vitro	-

## Sheet: Supplementary table 4
Table S4: Sources of concentration data (in vitro, proteomics-derived and estimated) used in the analysis and depicted in Figure 3.
Gene name	UniProt AC	LLPSDB EntryID/PMID	concentration (µM)	source
FUS	P35637	LLPS000016	10	In vitro
FUS	P35637	LLPS000016	0.4	In vitro
FUS	P35637	LLPS000016	5	In vitro
FUS	P35637	LLPS000016	1	In vitro
FUS	P35637	LLPS000016	2	In vitro
FUS	P35637	LLPS000016	7.5	In vitro
FUS	P35637	LLPS000016	7	In vitro
FUS	P35637	LLPS000016	9	In vitro
FUS	P35637	LLPS000095	11	In vitro
FUS	P35637	LLPS000103	4	In vitro
FUS	P35637	LLPS000020	1.55	In vitro
FUS	P35637	LLPS000016	20	In vitro
FUS	P35637	LLPS000016	8	In vitro
FUS	P35637	LLPS000016	3	In vitro
EWSR1	Q01844	LLPS000097	1	In vitro
EWSR1	Q01844	LLPS000837	5	In vitro
EWSR1	Q01844	LLPS000837	15	In vitro
EWSR1	Q01844	LLPS000837	2	In vitro
TAF15	Q92804	LLPS000100	1	In vitro
TAF15	Q92804	LLPS000842	5	In vitro
TAF15	Q92804	LLPS000842	4	In vitro
HNRNPA0	Q13151	LLPS000740	5	In vitro
HNRNPA1	P09651	LLPS000159	5	In vitro
HNRNPA1	P09651	LLPS000166	100	In vitro
HNRNPA1	P09651	LLPS000157	500	In vitro
HNRNPA1	P09651	LLPS000157	300	In vitro
HNRNPA1	P09651	LLPS000157	140	In vitro
HNRNPA1	P09651	LLPS000157	155	In vitro
HNRNPA1	P09651	LLPS000157	160	In vitro
HNRNPA1	P09651	LLPS000157	20	In vitro
HNRNPA1	P09651	LLPS000157	50	In vitro
HNRNPA1	P09651	LLPS000161	12.5	In vitro
HNRNPA1	P09651	LLPS000182	10	In vitro
HNRNPA1	P09651	LLPS000157	80	In vitro
HNRNPA1	P09651	LLPS000160	0.5	In vitro
HNRNPA1	P09651	LLPS000157	40.5	In vitro
HNRNPA1	P09651	LLPS000180	30	In vitro
HNRNPA1	P09651	LLPS000157	3300	In vitro
HNRNPA2B1	P22626	LLPS000716	15	In vitro
HNRNPA2B1	P22626	LLPS000717	5	In vitro
HNRNPA3	P51991	LLPS000831	5	In vitro
HNRNPA3	P51991	LLPS000831	25	In vitro
HNRNPH1	P31943	LLPS000713	5	In vitro
HNRNPH2	P55795	LLPS000714	5	In vitro
HNRNPH3	P31942	LLPS000712	5	In vitro
HNRNPDL	O14979	LLPS000711	5	In vitro
CSTF2	P33240	LLPS000715	5	In vitro
CSTF2T	Q9H0L4	LLPS000732	5	In vitro
DAZAP1	Q96EP5	LLPS000741	5	In vitro
PSPC1	Q8WXF1	LLPS000737	5	In vitro
TIA1	P31483	LLPS000147	5	In vitro
TIA1	P31483	LLPS000153	7	In vitro
TIA1	P31483	LLPS000154	4	In vitro
TIA1	P31483	LLPS000147	7.3	In vitro
TIA1	P31483	LLPS000147	6.4	In vitro
TIAL1	Q01085	LLPS000743	5	In vitro
TARDBP	Q13148	LLPS000412	2.5	In vitro
TARDBP	Q13148	LLPS000412	5	In vitro
TARDBP	Q13148	LLPS000412	10	In vitro
TARDBP	Q13148	LLPS000412	1	In vitro
TARDBP	Q13148	LLPS000222	2	In vitro
TARDBP	Q13148	LLPS000412	0.5	In vitro
RBM14	Q96PK6	PMID:26283796	1212.27	In vitro
FMR1	Q06787	LLPS000459	50	In vitro
FMR1	Q06787	PMID:30765518	25	In vitro
PTBP1	P26599	LLPS000209	10	In vitro
PTBP1	P26599	LLPS000194	20	In vitro
PTBP1	P26599	LLPS000195	3.75	In vitro
PTBP1	P26599	LLPS000194	136	In vitro
U2AF65	P26368	PMID:31271494	1	In vitro
U2AF65	P26368	PMID:31271494	2	In vitro
YTHDF1	Q9BYJ9	PMID:31388144	5	In vitro
YTHDF1	Q9BYJ9	PMID:31388144	10	In vitro
YTHDF1	Q9BYJ9	PMID:31388144	15	In vitro
YTHDF2	Q9Y5A9	PMID:31388144	5	In vitro
YTHDF2	Q9Y5A9	PMID:31388144	10	In vitro
YTHDF2	Q9Y5A9	PMID:31388144	15	In vitro
YTHDF2	Q9Y5A9	PMID:31292544	4	In vitro
YTHDF3	Q7Z739	PMID:31388144	5	In vitro
YTHDF3	Q7Z739	PMID:31388144	10	In vitro
YTHDF3	Q7Z739	PMID:31388144	15	In vitro
DDX3X	O00571	LLPS001088	100	In vitro
DDX3X	O00571	LLPS001088	150	In vitro
DDX3X	O00571	PMID:30531905	0.25	In vitro
DDX3X	O00571	PMID:30531905	0.5	In vitro
DDX4	Q9NQI0	LLPS000217	100	In vitro
DDX4	Q9NQI0	LLPS000217	202	In vitro
DDX4	Q9NQI0	LLPS000217	11	In vitro
DDX4	Q9NQI0	LLPS000217	54	In vitro
DDX4	Q9NQI0	LLPS000220	162.5	In vitro
DDX4	Q9NQI0	LLPS000217	7864.75	In vitro
DDX4	Q9NQI0	LLPS000217	78.6475	In vitro
DDX4	Q9NQI0	LLPS000217	30	In vitro
POLR2A	P24928	LLPS000093	50	In vitro
POLR2A	P24928	LLPS000691	20	In vitro
POLR2A	P24928	LLPS000691	5	In vitro
POLR2A	P24928	LLPS000691	10	In vitro
POLR2A	P24928	LLPS000872	0.5	In vitro
POLR2A	P24928	LLPS000687	31.1415	In vitro
MED1	Q15648	LLPS000745	20	In vitro
MED1	Q15648	LLPS000745	0.625	In vitro
MED1	Q15648	LLPS000745	10	In vitro
BRD4	O60885	LLPS000744	20	In vitro
BRD4	O60885	LLPS000744	0.625	In vitro
BRD4	O60885	LLPS000744	10	In vitro
MYC	P01106	LLPS001001	12	In vitro
MYC	P01106	LLPS001002	10	In vitro
SOX2	P48431	LLPS001007	40	In vitro
SOX2	P48431	LLPS001008	10	In vitro
GATA2	P23769	LLPS001011	40	In vitro
GATA2	P23769	LLPS001012	10	In vitro
GATA3	P23771	PMID:30833784	7	In vitro
RARA	P10276	LLPS001009	40	In vitro
RARA	P10276	LLPS001010	10	In vitro
NANOG	Q9H9S0	LLPS001005	10	In vitro
ESR1	P03372	LLPS001013	40	In vitro
ESR1	P03372	LLPS001014	10	In vitro
ESR1	P03372	PMID:30833784	7	In vitro
NPM1	P06748	LLPS000323	7	In vitro
NPM1	P06748	LLPS000328	2	In vitro
NPM1	P06748	LLPS000364	40	In vitro
NPM1	P06748	LLPS000365	10	In vitro
NPM1	P06748	LLPS000328	30	In vitro
NPM1	P06748	LLPS000324	20	In vitro
NPM1	P06748	LLPS000376	2.5	In vitro
NPM1	P06748	LLPS000377	0.5	In vitro
NPM1	P06748	LLPS000377	5	In vitro
NPM1	P06748	LLPS000375	15	In vitro
RPL5	P46777	LLPS000364	120	In vitro
RPL5	P46777	LLPS000365	200	In vitro
RPL5	P46777	LLPS000365	50	In vitro
RPL5	P46777	LLPS000367	600	In vitro
RPL5	P46777	LLPS000370	160	In vitro
RPL23A	P62750	LLPS000387	40	In vitro
SURF6	O75683	LLPS000378	60	In vitro
SURF6	O75683	LLPS000376	20	In vitro
SURF6	O75683	LLPS000376	7.5	In vitro
SURF6	O75683	LLPS000376	11	In vitro
SURF6	O75683	LLPS000379	10	In vitro
SURF6	O75683	LLPS000383	50	In vitro
SURF6	O75683	LLPS000377	0.5	In vitro
SURF6	O75683	LLPS000375	30	In vitro
SURF6	O75683	LLPS000385	15	In vitro
GNL2	Q13823	LLPS000374	200	In vitro
GNL2	Q13823	LLPS000373	20	In vitro
CBX2	Q14781	LLPS001021	2.4	In vitro
CBX2	Q14781	LLPS001022	4.8	In vitro
CBX5	P45973	LLPS000520	400	In vitro
CBX5	P45973	PMID:28636604	200	In vitro
CGAS	Q8N884	LLPS000750	10	In vitro
CGAS	Q8N884	LLPS000750	5	In vitro
CGAS	Q8N884	LLPS000750	0.5005	In vitro
CGAS	Q8N884	LLPS000756	20	In vitro
CGAS	Q8N884	LLPS000756	0.0025	In vitro
MORC3	Q14149	PMID:31284181	13.3	In vitro
TP53BP1	Q12888	PMID:31267591	1.66	In vitro
NPHS1	O60500	LLPS000261	3	In vitro
NPHS1	O60500	LLPS000261	7.5	In vitro
NPHS1	O60500	LLPS000568	4.5	In vitro
NPHS1	O60500	LLPS000275	0.01	In vitro
NCK1	P16333	LLPS000624	0.5	In vitro
NCK1	P16333	LLPS000261	10	In vitro
NCK1	P16333	LLPS000258	50	In vitro
WASL	O00401	PMID:26553976	50	In vitro
WASL	O00401	PMID:26553976	15	In vitro
WASL	O00401	PMID:30846599	0.05	In vitro
WASL	O00401	PMID:30846599	0.1	In vitro
WASL	O00401	PMID:30846599	0.125	In vitro
WASL	O00401	PMID:30846599	0.25	In vitro
WASL	O00401	PMID:30846599	0.5	In vitro
LAT	O43561	LLPS000624	0.003	In vitro
LAT	O43561	LLPS000616	0.01	In vitro
LAT	O43561	LLPS000616	0.000505	In vitro
GRB2	P62993	LLPS000616	0.5	In vitro
GRB2	P62993	LLPS000616	0.125	In vitro
GRB2	P62993	LLPS000618	0.31	In vitro
GRB2	P62993	LLPS000618	2	In vitro
GRB2	P62993	LLPS000776	10	In vitro
SOS1	Q07889	LLPS000616	0.25	In vitro
SOS1	Q07889	LLPS000616	0.062	In vitro
SOS1	Q07889	LLPS000619	0.5	In vitro
SOS1	Q07889	LLPS000618	0.992	In vitro
SOS1	Q07889	LLPS000617	0.031	In vitro
GRAP2	O75791	LLPS000624	0.5	In vitro
LCP2	Q13094	LLPS000624	0.25	In vitro
SYNGAP1	Q96PV0	PMID:27565345	25	In vitro
SYNGAP1	Q96PV0	PMID:27565345	100	In vitro
DLG4	P78352	LLPS000401	20	In vitro
DLG4	P78352	LLPS000401	10	In vitro
DLG4	P78352	LLPS000401	5	In vitro
DLG4	P78352	LLPS000398	40	In vitro
DLG4	P78352	LLPS000398	25	In vitro
DLG4	P78352	LLPS000402	1	In vitro
DLG4	P78352	LLPS000402	4	In vitro
HOMER3	Q9NSC5	LLPS000401	20	In vitro
HOMER3	Q9NSC5	LLPS000401	10	In vitro
HOMER3	Q9NSC5	LLPS000401	5	In vitro
HOMER3	Q9NSC5	LLPS000402	40	In vitro
HOMER3	Q9NSC5	LLPS000402	25	In vitro
HOMER3	Q9NSC5	LLPS000402	1	In vitro
HOMER3	Q9NSC5	LLPS001035	80	In vitro
HOMER3	Q9NSC5	LLPS000402	4	In vitro
SYN1	P17600	LLPS000776	10	In vitro
SYN1	P17600	LLPS000772	0.5	In vitro
SYN1	P17600	LLPS000772	0.1	In vitro
SYN1	P17600	LLPS000772	1	In vitro
SYN2	Q92777	LLPS000777	10	In vitro
NUP98	P52948	PMID:25562883	5	In vitro
NUP153	P49790	PMID:21961597	3282.6	In vitro
AGO2	Q9UKV8	PMID:29576456	2.5	In vitro
TNRC6B	Q9UPQ9	PMID:29576456	10	In vitro
SPOP	O43791	LLPS000884	15	In vitro
SPOP	O43791	LLPS000884	1	In vitro
DAXX	Q9UER7	LLPS000884	75	In vitro
DAXX	Q9UER7	LLPS000884	5	In vitro
DAXX	Q9UER7	LLPS000891	100	In vitro
AR	P10275	LLPS000890	70	In vitro
AR	P10275	LLPS000892	100	In vitro
UBQLN2	Q9UHD9	LLPS000092	4	In vitro
UBQLN2	Q9UHD9	LLPS000535	50	In vitro
UBQLN2	Q9UHD9	LLPS000535	1	In vitro
SQSTM1	Q13501	LLPS000698	20	In vitro
SQSTM1	Q13501	LLPS000699	15	In vitro
SQSTM1	Q13501	LLPS000699	0.468	In vitro
SQSTM1	Q13501	LLPS000700	0.016	In vitro
UBC	P0CG48	LLPS000562	5	In vitro
UBC	P0CG48	LLPS000563	25	In vitro
UBC	P0CG48	LLPS000560	12.5	In vitro
UBC	P0CG48	LLPS000698	80	In vitro
UBC	P0CG48	LLPS000699	0.125	In vitro
CCNT1	O60563	LLPS000687	144.315	In vitro
CCNT1	O60563	LLPS000684	288.63	In vitro
DYRK1A	Q13627	LLPS000689	239.006	In vitro
MAPT	P10636	LLPS000492	11.25	In vitro
MAPT	P10636	LLPS000492	30	In vitro
MAPT	P10636	LLPS000492	20	In vitro
MAPT	P10636	LLPS000492	25	In vitro
MAPT	P10636	LLPS000492	18	In vitro
MAPT	P10636	LLPS000492	5	In vitro
MAPT	P10636	LLPS000492	1	In vitro
MAPT	P10636	LLPS000492	10	In vitro
MAPT	P10636	LLPS000492	2	In vitro
PRNP	P04156	LLPS000875	30	In vitro
PRNP	P04156	LLPS000875	5	In vitro
PRNP	P04156	PMID:30401430	0.4	In vitro
PRNP	P04156	LLPS000875	26	In vitro
APP	P05067	LLPS000963	25	In vitro
APP	P05067	PMID:30401430	0.003	In vitro
VHL	P40337	LLPS000958	25	In vitro
LGALS3	P17931	PMID:28893908	400	In vitro
ELN	P15502	LLPS001124	100	In vitro
FUS	P35637	N/A	0.277575	PAXdb tissue integr.
FUS	P35637	N/A	0.366279	PAXdb tissue integr.
FUS	P35637	N/A	0.727575	PAXdb tissue integr.
FUS	P35637	N/A	1.33555	PAXdb tissue integr.
FUS	P35637	N/A	0.333887	PAXdb tissue integr.
FUS	P35637	N/A	0.797342	PAXdb tissue integr.
FUS	P35637	N/A	0.961794	PAXdb tissue integr.
FUS	P35637	N/A	4.65947	PAXdb tissue integr.
FUS	P35637	N/A	1.42027	PAXdb tissue integr.
FUS	P35637	N/A	1.72924	PAXdb tissue integr.
FUS	P35637	N/A	1.7093	PAXdb tissue integr.
FUS	P35637	N/A	3.49336	PAXdb tissue integr.
FUS	P35637	N/A	1.4701	PAXdb tissue integr.
FUS	P35637	N/A	0.0025515	PAXdb tissue integr.
FUS	P35637	N/A	0.847176	PAXdb tissue integr.
FUS	P35637	N/A	0.0986711	PAXdb tissue integr.
FUS	P35637	N/A	0.258638	PAXdb tissue integr.
FUS	P35637	N/A	0.966777	PAXdb tissue integr.
FUS	P35637	N/A	1.00664	PAXdb tissue integr.
EWSR1	Q01844	N/A	0.583056	PAXdb tissue integr.
EWSR1	Q01844	N/A	0.15	PAXdb tissue integr.
EWSR1	Q01844	N/A	0.189867	PAXdb tissue integr.
EWSR1	Q01844	N/A	0.184385	PAXdb tissue integr.
EWSR1	Q01844	N/A	0.762458	PAXdb tissue integr.
EWSR1	Q01844	N/A	1.36545	PAXdb tissue integr.
EWSR1	Q01844	N/A	0.335382	PAXdb tissue integr.
EWSR1	Q01844	N/A	1.21096	PAXdb tissue integr.
EWSR1	Q01844	N/A	0.742525	PAXdb tissue integr.
EWSR1	Q01844	N/A	1.19103	PAXdb tissue integr.
EWSR1	Q01844	N/A	0.961794	PAXdb tissue integr.
EWSR1	Q01844	N/A	0.0747508	PAXdb tissue integr.
EWSR1	Q01844	N/A	0.137043	PAXdb tissue integr.
EWSR1	Q01844	N/A	0.063289	PAXdb tissue integr.
EWSR1	Q01844	N/A	0.722591	PAXdb tissue integr.
EWSR1	Q01844	N/A	0.154983	PAXdb tissue integr.
EWSR1	Q01844	N/A	0.131561	PAXdb tissue integr.
EWSR1	Q01844	N/A	0.00104153	PAXdb tissue integr.
EWSR1	Q01844	N/A	0.293522	PAXdb tissue integr.
TAF15	Q92804	N/A	0.306977	PAXdb tissue integr.
TAF15	Q92804	N/A	0.0971761	PAXdb tissue integr.
TAF15	Q92804	N/A	0.212292	PAXdb tissue integr.
TAF15	Q92804	N/A	0.218272	PAXdb tissue integr.
TAF15	Q92804	N/A	0.109635	PAXdb tissue integr.
TAF15	Q92804	N/A	0.252159	PAXdb tissue integr.
TAF15	Q92804	N/A	0.434053	PAXdb tissue integr.
TAF15	Q92804	N/A	0.757475	PAXdb tissue integr.
TAF15	Q92804	N/A	0.162458	PAXdb tissue integr.
TAF15	Q92804	N/A	0.533223	PAXdb tissue integr.
TAF15	Q92804	N/A	0.028505	PAXdb tissue integr.
TAF15	Q92804	N/A	0.0480399	PAXdb tissue integr.
TAF15	Q92804	N/A	0.317442	PAXdb tissue integr.
TAF15	Q92804	N/A	0.14103	PAXdb tissue integr.
TAF15	Q92804	N/A	0.528239	PAXdb tissue integr.
TAF15	Q92804	N/A	0.583056	PAXdb tissue integr.
TAF15	Q92804	N/A	0.380233	PAXdb tissue integr.
TAF15	Q92804	N/A	0.347342	PAXdb tissue integr.
HNRNPA0	Q13151	N/A	0.33289	PAXdb tissue integr.
HNRNPA0	Q13151	N/A	0.523256	PAXdb tissue integr.
HNRNPA0	Q13151	N/A	0.94186	PAXdb tissue integr.
HNRNPA0	Q13151	N/A	0.60299	PAXdb tissue integr.
HNRNPA0	Q13151	N/A	1.99834	PAXdb tissue integr.
HNRNPA0	Q13151	N/A	1.24585	PAXdb tissue integr.
HNRNPA0	Q13151	N/A	3.0299	PAXdb tissue integr.
HNRNPA0	Q13151	N/A	0.219269	PAXdb tissue integr.
HNRNPA0	Q13151	N/A	1.53987	PAXdb tissue integr.
HNRNPA0	Q13151	N/A	2.96013	PAXdb tissue integr.
HNRNPA0	Q13151	N/A	4.80399	PAXdb tissue integr.
HNRNPA0	Q13151	N/A	0.018289	PAXdb tissue integr.
HNRNPA0	Q13151	N/A	1.20598	PAXdb tissue integr.
HNRNPA0	Q13151	N/A	0.118605	PAXdb tissue integr.
HNRNPA0	Q13151	N/A	0.707641	PAXdb tissue integr.
HNRNPA0	Q13151	N/A	0.0782392	PAXdb tissue integr.
HNRNPA0	Q13151	N/A	0.250664	PAXdb tissue integr.
HNRNPA0	Q13151	N/A	1.11628	PAXdb tissue integr.
HNRNPA0	Q13151	N/A	0.936877	PAXdb tissue integr.
HNRNPA1	P09651	N/A	0.026711	PAXdb tissue integr.
HNRNPA1	P09651	N/A	0.178405	PAXdb tissue integr.
HNRNPA1	P09651	N/A	2.26744	PAXdb tissue integr.
HNRNPA1	P09651	N/A	3.46844	PAXdb tissue integr.
HNRNPA1	P09651	N/A	3.75748	PAXdb tissue integr.
HNRNPA1	P09651	N/A	2.24751	PAXdb tissue integr.
HNRNPA1	P09651	N/A	1.53488	PAXdb tissue integr.
HNRNPA1	P09651	N/A	4.44518	PAXdb tissue integr.
HNRNPA1	P09651	N/A	2.42691	PAXdb tissue integr.
HNRNPA1	P09651	N/A	5.09302	PAXdb tissue integr.
HNRNPA1	P09651	N/A	2.08804	PAXdb tissue integr.
HNRNPA1	P09651	N/A	3.66777	PAXdb tissue integr.
HNRNPA1	P09651	N/A	4.83887	PAXdb tissue integr.
HNRNPA1	P09651	N/A	4.78405	PAXdb tissue integr.
HNRNPA1	P09651	N/A	2.06312	PAXdb tissue integr.
HNRNPA1	P09651	N/A	6.90698	PAXdb tissue integr.
HNRNPA1	P09651	N/A	0.206811	PAXdb tissue integr.
HNRNPA1	P09651	N/A	2.23754	PAXdb tissue integr.
HNRNPA1	P09651	N/A	3.03488	PAXdb tissue integr.
HNRNPA1	P09651	N/A	0.513289	PAXdb tissue integr.
HNRNPA1	P09651	N/A	1.8588	PAXdb tissue integr.
HNRNPA2B1	P22626	N/A	0.299003	PAXdb tissue integr.
HNRNPA2B1	P22626	N/A	1.16611	PAXdb tissue integr.
HNRNPA2B1	P22626	N/A	1.71429	PAXdb tissue integr.
HNRNPA2B1	P22626	N/A	2.65615	PAXdb tissue integr.
HNRNPA2B1	P22626	N/A	4.09136	PAXdb tissue integr.
HNRNPA2B1	P22626	N/A	4.87375	PAXdb tissue integr.
HNRNPA2B1	P22626	N/A	6.84219	PAXdb tissue integr.
HNRNPA2B1	P22626	N/A	7.94352	PAXdb tissue integr.
HNRNPA2B1	P22626	N/A	5.99502	PAXdb tissue integr.
HNRNPA2B1	P22626	N/A	5.88538	PAXdb tissue integr.
HNRNPA2B1	P22626	N/A	8.9103	PAXdb tissue integr.
HNRNPA2B1	P22626	N/A	11.4369	PAXdb tissue integr.
HNRNPA2B1	P22626	N/A	11.4518	PAXdb tissue integr.
HNRNPA2B1	P22626	N/A	11.6412	PAXdb tissue integr.
HNRNPA2B1	P22626	N/A	11.0083	PAXdb tissue integr.
HNRNPA2B1	P22626	N/A	7.01661	PAXdb tissue integr.
HNRNPA2B1	P22626	N/A	16.0216	PAXdb tissue integr.
HNRNPA2B1	P22626	N/A	14.8555	PAXdb tissue integr.
HNRNPA2B1	P22626	N/A	6.13953	PAXdb tissue integr.
HNRNPA2B1	P22626	N/A	0.0329402	PAXdb tissue integr.
HNRNPA2B1	P22626	N/A	6.62791	PAXdb tissue integr.
HNRNPA3	P51991	N/A	0.822259	PAXdb tissue integr.
HNRNPA3	P51991	N/A	0.0113123	PAXdb tissue integr.
HNRNPA3	P51991	N/A	2.06312	PAXdb tissue integr.
HNRNPA3	P51991	N/A	3.56811	PAXdb tissue integr.
HNRNPA3	P51991	N/A	2.87043	PAXdb tissue integr.
HNRNPA3	P51991	N/A	0.307973	PAXdb tissue integr.
HNRNPA3	P51991	N/A	1.81894	PAXdb tissue integr.
HNRNPA3	P51991	N/A	5.48671	PAXdb tissue integr.
HNRNPA3	P51991	N/A	3.65781	PAXdb tissue integr.
HNRNPA3	P51991	N/A	5.44684	PAXdb tissue integr.
HNRNPA3	P51991	N/A	2.37708	PAXdb tissue integr.
HNRNPA3	P51991	N/A	4.80897	PAXdb tissue integr.
HNRNPA3	P51991	N/A	5.99502	PAXdb tissue integr.
HNRNPA3	P51991	N/A	4.201	PAXdb tissue integr.
HNRNPA3	P51991	N/A	5.33223	PAXdb tissue integr.
HNRNPA3	P51991	N/A	3.90698	PAXdb tissue integr.
HNRNPA3	P51991	N/A	2.48671	PAXdb tissue integr.
HNRNPA3	P51991	N/A	0.682724	PAXdb tissue integr.
HNRNPA3	P51991	N/A	0.205814	PAXdb tissue integr.
HNRNPA3	P51991	N/A	1.46512	PAXdb tissue integr.
HNRNPA3	P51991	N/A	3.73256	PAXdb tissue integr.
HNRNPH1	P31943	N/A	0.802326	PAXdb tissue integr.
HNRNPH1	P31943	N/A	1.46013	PAXdb tissue integr.
HNRNPH1	P31943	N/A	0.956811	PAXdb tissue integr.
HNRNPH1	P31943	N/A	1.58472	PAXdb tissue integr.
HNRNPH1	P31943	N/A	0.63289	PAXdb tissue integr.
HNRNPH1	P31943	N/A	1.62458	PAXdb tissue integr.
HNRNPH1	P31943	N/A	1.74917	PAXdb tissue integr.
HNRNPH1	P31943	N/A	2.26246	PAXdb tissue integr.
HNRNPH1	P31943	N/A	1.15615	PAXdb tissue integr.
HNRNPH1	P31943	N/A	3.22425	PAXdb tissue integr.
HNRNPH1	P31943	N/A	1.75914	PAXdb tissue integr.
HNRNPH1	P31943	N/A	1.91362	PAXdb tissue integr.
HNRNPH1	P31943	N/A	3.62292	PAXdb tissue integr.
HNRNPH1	P31943	N/A	0.271096	PAXdb tissue integr.
HNRNPH1	P31943	N/A	0.177409	PAXdb tissue integr.
HNRNPH1	P31943	N/A	2.50166	PAXdb tissue integr.
HNRNPH1	P31943	N/A	0.627907	PAXdb tissue integr.
HNRNPH1	P31943	N/A	0.00384219	PAXdb tissue integr.
HNRNPH1	P31943	N/A	0.25814	PAXdb tissue integr.
HNRNPH1	P31943	N/A	1.63953	PAXdb tissue integr.
HNRNPH1	P31943	N/A	0.0163455	PAXdb tissue integr.
HNRNPH2	P55795	N/A	0.184385	PAXdb tissue integr.
HNRNPH2	P55795	N/A	1.26578	PAXdb tissue integr.
HNRNPH2	P55795	N/A	1.03654	PAXdb tissue integr.
HNRNPH2	P55795	N/A	0.812292	PAXdb tissue integr.
HNRNPH2	P55795	N/A	0.433555	PAXdb tissue integr.
HNRNPH2	P55795	N/A	1.36545	PAXdb tissue integr.
HNRNPH2	P55795	N/A	1.42525	PAXdb tissue integr.
HNRNPH2	P55795	N/A	1.29568	PAXdb tissue integr.
HNRNPH2	P55795	N/A	1.00166	PAXdb tissue integr.
HNRNPH2	P55795	N/A	2.39701	PAXdb tissue integr.
HNRNPH2	P55795	N/A	1.42027	PAXdb tissue integr.
HNRNPH2	P55795	N/A	1.15615	PAXdb tissue integr.
HNRNPH2	P55795	N/A	0.444518	PAXdb tissue integr.
HNRNPH2	P55795	N/A	0.712625	PAXdb tissue integr.
HNRNPH2	P55795	N/A	0.136047	PAXdb tissue integr.
HNRNPH2	P55795	N/A	1.15116	PAXdb tissue integr.
HNRNPH2	P55795	N/A	1.89369	PAXdb tissue integr.
HNRNPH2	P55795	N/A	0.180399	PAXdb tissue integr.
HNRNPH2	P55795	N/A	0.201827	PAXdb tissue integr.
HNRNPH2	P55795	N/A	0.0186877	PAXdb tissue integr.
HNRNPH2	P55795	N/A	0.000966777	PAXdb tissue integr.
HNRNPH3	P31942	N/A	0.503322	PAXdb tissue integr.
HNRNPH3	P31942	N/A	1.34551	PAXdb tissue integr.
HNRNPH3	P31942	N/A	2.85548	PAXdb tissue integr.
HNRNPH3	P31942	N/A	1.13123	PAXdb tissue integr.
HNRNPH3	P31942	N/A	0.418106	PAXdb tissue integr.
HNRNPH3	P31942	N/A	1.78405	PAXdb tissue integr.
HNRNPH3	P31942	N/A	1.6794	PAXdb tissue integr.
HNRNPH3	P31942	N/A	1.62957	PAXdb tissue integr.
HNRNPH3	P31942	N/A	3.02492	PAXdb tissue integr.
HNRNPH3	P31942	N/A	1.54983	PAXdb tissue integr.
HNRNPH3	P31942	N/A	3.11462	PAXdb tissue integr.
HNRNPH3	P31942	N/A	1.04651	PAXdb tissue integr.
HNRNPH3	P31942	N/A	1.23588	PAXdb tissue integr.
HNRNPH3	P31942	N/A	0.204817	PAXdb tissue integr.
HNRNPH3	P31942	N/A	1.75415	PAXdb tissue integr.
HNRNPH3	P31942	N/A	0.359302	PAXdb tissue integr.
HNRNPH3	P31942	N/A	0.28206	PAXdb tissue integr.
HNRNPH3	P31942	N/A	1.47508	PAXdb tissue integr.
HNRNPH3	P31942	N/A	2.21761	PAXdb tissue integr.
HNRNPH3	P31942	N/A	0.00335382	PAXdb tissue integr.
HNRNPDL	O14979	N/A	0.401661	PAXdb tissue integr.
HNRNPDL	O14979	N/A	1.00664	PAXdb tissue integr.
HNRNPDL	O14979	N/A	0.292027	PAXdb tissue integr.
HNRNPDL	O14979	N/A	0.490365	PAXdb tissue integr.
HNRNPDL	O14979	N/A	0.206811	PAXdb tissue integr.
HNRNPDL	O14979	N/A	1.6794	PAXdb tissue integr.
HNRNPDL	O14979	N/A	0.677741	PAXdb tissue integr.
HNRNPDL	O14979	N/A	2.35714	PAXdb tissue integr.
HNRNPDL	O14979	N/A	0.324419	PAXdb tissue integr.
HNRNPDL	O14979	N/A	0.777409	PAXdb tissue integr.
HNRNPDL	O14979	N/A	2.8206	PAXdb tissue integr.
HNRNPDL	O14979	N/A	0.727575	PAXdb tissue integr.
HNRNPDL	O14979	N/A	0.10814	PAXdb tissue integr.
HNRNPDL	O14979	N/A	0.00687708	PAXdb tissue integr.
HNRNPDL	O14979	N/A	0.931894	PAXdb tissue integr.
HNRNPDL	O14979	N/A	0.396678	PAXdb tissue integr.
HNRNPDL	O14979	N/A	0.000956811	PAXdb tissue integr.
HNRNPDL	O14979	N/A	0.171429	PAXdb tissue integr.
HNRNPDL	O14979	N/A	0.485382	PAXdb tissue integr.
HNRNPDL	O14979	N/A	0.747508	PAXdb tissue integr.
CSTF2	P33240	N/A	0.026711	PAXdb tissue integr.
CSTF2	P33240	N/A	0.0388704	PAXdb tissue integr.
CSTF2	P33240	N/A	0.180897	PAXdb tissue integr.
CSTF2	P33240	N/A	0.0583056	PAXdb tissue integr.
CSTF2	P33240	N/A	0.0103654	PAXdb tissue integr.
CSTF2	P33240	N/A	0.197841	PAXdb tissue integr.
CSTF2	P33240	N/A	0.0113621	PAXdb tissue integr.
CSTF2	P33240	N/A	0.203821	PAXdb tissue integr.
CSTF2	P33240	N/A	0.0305482	PAXdb tissue integr.
CSTF2	P33240	N/A	0.0218771	PAXdb tissue integr.
CSTF2	P33240	N/A	0.0224751	PAXdb tissue integr.
CSTF2	P33240	N/A	0.0543189	PAXdb tissue integr.
CSTF2	P33240	N/A	0.040515	PAXdb tissue integr.
CSTF2	P33240	N/A	0.0244186	PAXdb tissue integr.
CSTF2	P33240	N/A	0.0183389	PAXdb tissue integr.
CSTF2	P33240	N/A	0.0292525	PAXdb tissue integr.
CSTF2	P33240	N/A	0.0271595	PAXdb tissue integr.
CSTF2T	Q9H0L4	N/A	0.0548173	PAXdb tissue integr.
CSTF2T	Q9H0L4	N/A	0.0197342	PAXdb tissue integr.
CSTF2T	Q9H0L4	N/A	0.12608	PAXdb tissue integr.
CSTF2T	Q9H0L4	N/A	0.094186	PAXdb tissue integr.
CSTF2T	Q9H0L4	N/A	0.0553156	PAXdb tissue integr.
CSTF2T	Q9H0L4	N/A	0.0335382	PAXdb tissue integr.
CSTF2T	Q9H0L4	N/A	0.176412	PAXdb tissue integr.
CSTF2T	Q9H0L4	N/A	0.00528239	PAXdb tissue integr.
CSTF2T	Q9H0L4	N/A	0.0249169	PAXdb tissue integr.
CSTF2T	Q9H0L4	N/A	0.0243189	PAXdb tissue integr.
CSTF2T	Q9H0L4	N/A	0.0156478	PAXdb tissue integr.
CSTF2T	Q9H0L4	N/A	0.0182392	PAXdb tissue integr.
CSTF2T	Q9H0L4	N/A	0.0112126	PAXdb tissue integr.
CSTF2T	Q9H0L4	N/A	0.00916944	PAXdb tissue integr.
CSTF2T	Q9H0L4	N/A	0.00767442	PAXdb tissue integr.
DAZAP1	Q96EP5	N/A	0.326412	PAXdb tissue integr.
DAZAP1	Q96EP5	N/A	0.0667774	PAXdb tissue integr.
DAZAP1	Q96EP5	N/A	0.187375	PAXdb tissue integr.
DAZAP1	Q96EP5	N/A	0.086711	PAXdb tissue integr.
DAZAP1	Q96EP5	N/A	0.901993	PAXdb tissue integr.
DAZAP1	Q96EP5	N/A	0.417608	PAXdb tissue integr.
DAZAP1	Q96EP5	N/A	0.702658	PAXdb tissue integr.
DAZAP1	Q96EP5	N/A	0.92691	PAXdb tissue integr.
DAZAP1	Q96EP5	N/A	0.310465	PAXdb tissue integr.
DAZAP1	Q96EP5	N/A	0.362292	PAXdb tissue integr.
DAZAP1	Q96EP5	N/A	0.677741	PAXdb tissue integr.
DAZAP1	Q96EP5	N/A	0.931894	PAXdb tissue integr.
DAZAP1	Q96EP5	N/A	0.0448007	PAXdb tissue integr.
DAZAP1	Q96EP5	N/A	0.0872093	PAXdb tissue integr.
DAZAP1	Q96EP5	N/A	0.00762458	PAXdb tissue integr.
DAZAP1	Q96EP5	N/A	0.390698	PAXdb tissue integr.
DAZAP1	Q96EP5	N/A	0.0196346	PAXdb tissue integr.
DAZAP1	Q96EP5	N/A	0.293522	PAXdb tissue integr.
PSPC1	Q8WXF1	N/A	0.0667774	PAXdb tissue integr.
PSPC1	Q8WXF1	N/A	0.119103	PAXdb tissue integr.
PSPC1	Q8WXF1	N/A	0.147508	PAXdb tissue integr.
PSPC1	Q8WXF1	N/A	0.109136	PAXdb tissue integr.
PSPC1	Q8WXF1	N/A	0.41113	PAXdb tissue integr.
PSPC1	Q8WXF1	N/A	0.329402	PAXdb tissue integr.
PSPC1	Q8WXF1	N/A	0.996678	PAXdb tissue integr.
PSPC1	Q8WXF1	N/A	0.0722591	PAXdb tissue integr.
PSPC1	Q8WXF1	N/A	0.627907	PAXdb tissue integr.
PSPC1	Q8WXF1	N/A	0.430565	PAXdb tissue integr.
PSPC1	Q8WXF1	N/A	0.323422	PAXdb tissue integr.
PSPC1	Q8WXF1	N/A	0.598007	PAXdb tissue integr.
PSPC1	Q8WXF1	N/A	0.0286047	PAXdb tissue integr.
PSPC1	Q8WXF1	N/A	0.223754	PAXdb tissue integr.
PSPC1	Q8WXF1	N/A	0.0478405	PAXdb tissue integr.
PSPC1	Q8WXF1	N/A	0.971761	PAXdb tissue integr.
PSPC1	Q8WXF1	N/A	0.000887043	PAXdb tissue integr.
PSPC1	Q8WXF1	N/A	0.362791	PAXdb tissue integr.
TIA1	P31483	N/A	0.166445	PAXdb tissue integr.
TIA1	P31483	N/A	0.0956811	PAXdb tissue integr.
TIA1	P31483	N/A	0.177907	PAXdb tissue integr.
TIA1	P31483	N/A	0.0642857	PAXdb tissue integr.
TIA1	P31483	N/A	0.165449	PAXdb tissue integr.
TIA1	P31483	N/A	0.134551	PAXdb tissue integr.
TIA1	P31483	N/A	0.115116	PAXdb tissue integr.
TIA1	P31483	N/A	0.184884	PAXdb tissue integr.
TIA1	P31483	N/A	0.0181894	PAXdb tissue integr.
TIA1	P31483	N/A	0.125581	PAXdb tissue integr.
TIA1	P31483	N/A	0.165947	PAXdb tissue integr.
TIA1	P31483	N/A	0.00742525	PAXdb tissue integr.
TIA1	P31483	N/A	0.112126	PAXdb tissue integr.
TIA1	P31483	N/A	0.0193355	PAXdb tissue integr.
TIA1	P31483	N/A	0.0523256	PAXdb tissue integr.
TIA1	P31483	N/A	0.0244684	PAXdb tissue integr.
TIA1	P31483	N/A	0.0101163	PAXdb tissue integr.
TIAL1	Q01085	N/A	0.107641	PAXdb tissue integr.
TIAL1	Q01085	N/A	0.0762458	PAXdb tissue integr.
TIAL1	Q01085	N/A	0.14402	PAXdb tissue integr.
TIAL1	Q01085	N/A	0.0278571	PAXdb tissue integr.
TIAL1	Q01085	N/A	0.0353821	PAXdb tissue integr.
TIAL1	Q01085	N/A	0.11412	PAXdb tissue integr.
TIAL1	Q01085	N/A	0.236213	PAXdb tissue integr.
TIAL1	Q01085	N/A	0.399169	PAXdb tissue integr.
TIAL1	Q01085	N/A	0.202824	PAXdb tissue integr.
TIAL1	Q01085	N/A	0.284053	PAXdb tissue integr.
TIAL1	Q01085	N/A	0.230731	PAXdb tissue integr.
TIAL1	Q01085	N/A	0.00578073	PAXdb tissue integr.
TIAL1	Q01085	N/A	0.0435548	PAXdb tissue integr.
TIAL1	Q01085	N/A	0.126578	PAXdb tissue integr.
TIAL1	Q01085	N/A	0.041711	PAXdb tissue integr.
TIAL1	Q01085	N/A	0.205316	PAXdb tissue integr.
TIAL1	Q01085	N/A	0.342857	PAXdb tissue integr.
TIAL1	Q01085	N/A	0.231229	PAXdb tissue integr.
TARDBP	Q13148	N/A	0.508306	PAXdb tissue integr.
TARDBP	Q13148	N/A	0.409635	PAXdb tissue integr.
TARDBP	Q13148	N/A	0.847176	PAXdb tissue integr.
TARDBP	Q13148	N/A	1.23588	PAXdb tissue integr.
TARDBP	Q13148	N/A	0.712625	PAXdb tissue integr.
TARDBP	Q13148	N/A	1.96346	PAXdb tissue integr.
TARDBP	Q13148	N/A	0.543189	PAXdb tissue integr.
TARDBP	Q13148	N/A	1.19103	PAXdb tissue integr.
TARDBP	Q13148	N/A	1.57475	PAXdb tissue integr.
TARDBP	Q13148	N/A	0.946844	PAXdb tissue integr.
TARDBP	Q13148	N/A	2.03322	PAXdb tissue integr.
TARDBP	Q13148	N/A	0.000931894	PAXdb tissue integr.
TARDBP	Q13148	N/A	0.0379734	PAXdb tissue integr.
TARDBP	Q13148	N/A	0.193355	PAXdb tissue integr.
TARDBP	Q13148	N/A	0.832226	PAXdb tissue integr.
TARDBP	Q13148	N/A	0.857143	PAXdb tissue integr.
TARDBP	Q13148	N/A	0.112625	PAXdb tissue integr.
TARDBP	Q13148	N/A	0.107143	PAXdb tissue integr.
TARDBP	Q13148	N/A	0.26412	PAXdb tissue integr.
TARDBP	Q13148	N/A	0.936877	PAXdb tissue integr.
RBM14	Q96PK6	N/A	0.33588	PAXdb tissue integr.
RBM14	Q96PK6	N/A	0.0687708	PAXdb tissue integr.
RBM14	Q96PK6	N/A	0.128571	PAXdb tissue integr.
RBM14	Q96PK6	N/A	0.248671	PAXdb tissue integr.
RBM14	Q96PK6	N/A	0.165947	PAXdb tissue integr.
RBM14	Q96PK6	N/A	0.477907	PAXdb tissue integr.
RBM14	Q96PK6	N/A	0.415116	PAXdb tissue integr.
RBM14	Q96PK6	N/A	0.00063289	PAXdb tissue integr.
RBM14	Q96PK6	N/A	1.38538	PAXdb tissue integr.
RBM14	Q96PK6	N/A	0.199336	PAXdb tissue integr.
RBM14	Q96PK6	N/A	0.316944	PAXdb tissue integr.
RBM14	Q96PK6	N/A	0.171429	PAXdb tissue integr.
RBM14	Q96PK6	N/A	0.89701	PAXdb tissue integr.
RBM14	Q96PK6	N/A	1.07641	PAXdb tissue integr.
RBM14	Q96PK6	N/A	0.282558	PAXdb tissue integr.
RBM14	Q96PK6	N/A	0.150997	PAXdb tissue integr.
RBM14	Q96PK6	N/A	0.0901993	PAXdb tissue integr.
RBM14	Q96PK6	N/A	0.757475	PAXdb tissue integr.
FMR1	Q06787	N/A	0.0211296	PAXdb tissue integr.
FMR1	Q06787	N/A	0.0817276	PAXdb tissue integr.
FMR1	Q06787	N/A	0.376246	PAXdb tissue integr.
FMR1	Q06787	N/A	0.0697674	PAXdb tissue integr.
FMR1	Q06787	N/A	0.00991694	PAXdb tissue integr.
FMR1	Q06787	N/A	0.0375748	PAXdb tissue integr.
FMR1	Q06787	N/A	0.0252658	PAXdb tissue integr.
FMR1	Q06787	N/A	0.221761	PAXdb tissue integr.
FMR1	Q06787	N/A	0.010515	PAXdb tissue integr.
FMR1	Q06787	N/A	0.00906977	PAXdb tissue integr.
FMR1	Q06787	N/A	0.0412126	PAXdb tissue integr.
FMR1	Q06787	N/A	0.0116611	PAXdb tissue integr.
FMR1	Q06787	N/A	0.0543189	PAXdb tissue integr.
FMR1	Q06787	N/A	0.00392691	PAXdb tissue integr.
FMR1	Q06787	N/A	0.0236213	PAXdb tissue integr.
FMR1	Q06787	N/A	0.00712625	PAXdb tissue integr.
PTBP1	P26599	N/A	0.563123	PAXdb tissue integr.
PTBP1	P26599	N/A	1.89867	PAXdb tissue integr.
PTBP1	P26599	N/A	1.92857	PAXdb tissue integr.
PTBP1	P26599	N/A	1.16611	PAXdb tissue integr.
PTBP1	P26599	N/A	4.24585	PAXdb tissue integr.
PTBP1	P26599	N/A	1.56977	PAXdb tissue integr.
PTBP1	P26599	N/A	4.81395	PAXdb tissue integr.
PTBP1	P26599	N/A	2.62625	PAXdb tissue integr.
PTBP1	P26599	N/A	8.35216	PAXdb tissue integr.
PTBP1	P26599	N/A	1.9485	PAXdb tissue integr.
PTBP1	P26599	N/A	4.17608	PAXdb tissue integr.
PTBP1	P26599	N/A	5.72093	PAXdb tissue integr.
PTBP1	P26599	N/A	4.10631	PAXdb tissue integr.
PTBP1	P26599	N/A	2.39203	PAXdb tissue integr.
PTBP1	P26599	N/A	2.50166	PAXdb tissue integr.
PTBP1	P26599	N/A	2.15781	PAXdb tissue integr.
PTBP1	P26599	N/A	0.100664	PAXdb tissue integr.
PTBP1	P26599	N/A	0.149502	PAXdb tissue integr.
PTBP1	P26599	N/A	0.00936877	PAXdb tissue integr.
PTBP1	P26599	N/A	0.872093	PAXdb tissue integr.
PTBP1	P26599	N/A	0.353322	PAXdb tissue integr.
U2AF65	P26368	N/A	0.0862126	PAXdb tissue integr.
U2AF65	P26368	N/A	0.398173	PAXdb tissue integr.
U2AF65	P26368	N/A	0.162458	PAXdb tissue integr.
U2AF65	P26368	N/A	0.271595	PAXdb tissue integr.
U2AF65	P26368	N/A	0.207807	PAXdb tissue integr.
U2AF65	P26368	N/A	1.04153	PAXdb tissue integr.
U2AF65	P26368	N/A	0.543189	PAXdb tissue integr.
U2AF65	P26368	N/A	1.88372	PAXdb tissue integr.
U2AF65	P26368	N/A	0.0657807	PAXdb tissue integr.
U2AF65	P26368	N/A	1.09136	PAXdb tissue integr.
U2AF65	P26368	N/A	0.472425	PAXdb tissue integr.
U2AF65	P26368	N/A	1.27575	PAXdb tissue integr.
U2AF65	P26368	N/A	0.203322	PAXdb tissue integr.
U2AF65	P26368	N/A	1.80897	PAXdb tissue integr.
U2AF65	P26368	N/A	0.00141528	PAXdb tissue integr.
U2AF65	P26368	N/A	0.026412	PAXdb tissue integr.
U2AF65	P26368	N/A	0.55814	PAXdb tissue integr.
U2AF65	P26368	N/A	0.094186	PAXdb tissue integr.
YTHDF1	Q9BYJ9	N/A	0.0797342	PAXdb tissue integr.
YTHDF1	Q9BYJ9	N/A	0.0652824	PAXdb tissue integr.
YTHDF1	Q9BYJ9	N/A	0.134053	PAXdb tissue integr.
YTHDF1	Q9BYJ9	N/A	0.164452	PAXdb tissue integr.
YTHDF1	Q9BYJ9	N/A	0.103156	PAXdb tissue integr.
YTHDF1	Q9BYJ9	N/A	0.218272	PAXdb tissue integr.
YTHDF1	Q9BYJ9	N/A	0.140033	PAXdb tissue integr.
YTHDF1	Q9BYJ9	N/A	0.10515	PAXdb tissue integr.
YTHDF1	Q9BYJ9	N/A	0.231728	PAXdb tissue integr.
YTHDF1	Q9BYJ9	N/A	0.128073	PAXdb tissue integr.
YTHDF1	Q9BYJ9	N/A	0.063289	PAXdb tissue integr.
YTHDF1	Q9BYJ9	N/A	0.0187375	PAXdb tissue integr.
YTHDF1	Q9BYJ9	N/A	0.0762458	PAXdb tissue integr.
YTHDF1	Q9BYJ9	N/A	0.0303987	PAXdb tissue integr.
YTHDF1	Q9BYJ9	N/A	0.107641	PAXdb tissue integr.
YTHDF1	Q9BYJ9	N/A	0.0122591	PAXdb tissue integr.
YTHDF1	Q9BYJ9	N/A	0.00607973	PAXdb tissue integr.
YTHDF1	Q9BYJ9	N/A	0.00456478	PAXdb tissue integr.
YTHDF2	Q9Y5A9	N/A	0.094186	PAXdb tissue integr.
YTHDF2	Q9Y5A9	N/A	0.0377243	PAXdb tissue integr.
YTHDF2	Q9Y5A9	N/A	0.00981728	PAXdb tissue integr.
YTHDF2	Q9Y5A9	N/A	0.0427076	PAXdb tissue integr.
YTHDF2	Q9Y5A9	N/A	0.327907	PAXdb tissue integr.
YTHDF2	Q9Y5A9	N/A	0.161462	PAXdb tissue integr.
YTHDF2	Q9Y5A9	N/A	0.0872093	PAXdb tissue integr.
YTHDF2	Q9Y5A9	N/A	0.269601	PAXdb tissue integr.
YTHDF2	Q9Y5A9	N/A	0.00578073	PAXdb tissue integr.
YTHDF2	Q9Y5A9	N/A	0.0258638	PAXdb tissue integr.
YTHDF2	Q9Y5A9	N/A	0.0259635	PAXdb tissue integr.
YTHDF2	Q9Y5A9	N/A	0.0426578	PAXdb tissue integr.
YTHDF2	Q9Y5A9	N/A	0.0167442	PAXdb tissue integr.
YTHDF2	Q9Y5A9	N/A	0.0475415	PAXdb tissue integr.
YTHDF2	Q9Y5A9	N/A	0.00657807	PAXdb tissue integr.
YTHDF3	Q7Z739	N/A		PAXdb tissue integr.
DDX3X	O00571	N/A	0.456478	PAXdb tissue integr.
DDX3X	O00571	N/A	0.404153	PAXdb tissue integr.
DDX3X	O00571	N/A	0.227741	PAXdb tissue integr.
DDX3X	O00571	N/A	0.172924	PAXdb tissue integr.
DDX3X	O00571	N/A	0.345349	PAXdb tissue integr.
DDX3X	O00571	N/A	0.418605	PAXdb tissue integr.
DDX3X	O00571	N/A	0.578073	PAXdb tissue integr.
DDX3X	O00571	N/A	0.528239	PAXdb tissue integr.
DDX3X	O00571	N/A	0.462957	PAXdb tissue integr.
DDX3X	O00571	N/A	0.253654	PAXdb tissue integr.
DDX3X	O00571	N/A	1.1412	PAXdb tissue integr.
DDX3X	O00571	N/A	0.324419	PAXdb tissue integr.
DDX3X	O00571	N/A	0.0662791	PAXdb tissue integr.
DDX3X	O00571	N/A	0.000523256	PAXdb tissue integr.
DDX3X	O00571	N/A	0.183389	PAXdb tissue integr.
DDX3X	O00571	N/A	0.191362	PAXdb tissue integr.
DDX3X	O00571	N/A	0.1799	PAXdb tissue integr.
DDX3X	O00571	N/A	0.193854	PAXdb tissue integr.
DDX3X	O00571	N/A	0.440532	PAXdb tissue integr.
DDX3X	O00571	N/A	0.702658	PAXdb tissue integr.
DDX4	Q9NQI0	N/A	0.0181395	PAXdb tissue integr.
DDX4	Q9NQI0	N/A	0.344352	PAXdb tissue integr.
DDX4	Q9NQI0	N/A	0.000553156	PAXdb tissue integr.
DDX4	Q9NQI0	N/A	0.00508306	PAXdb tissue integr.
DDX4	Q9NQI0	N/A	0.00210299	PAXdb tissue integr.
DDX4	Q9NQI0	N/A	0.00877076	PAXdb tissue integr.
DDX4	Q9NQI0	N/A	0.00936877	PAXdb tissue integr.
DDX4	Q9NQI0	N/A	0.284053	PAXdb tissue integr.
DDX4	Q9NQI0	N/A	0.00892027	PAXdb tissue integr.
DDX4	Q9NQI0	N/A	0.00692691	PAXdb tissue integr.
DDX4	Q9NQI0	N/A	0.00906977	PAXdb tissue integr.
DDX4	Q9NQI0	N/A	0.00647841	PAXdb tissue integr.
DDX4	Q9NQI0	N/A	0.00030897	PAXdb tissue integr.
DDX4	Q9NQI0	N/A	0.0013804	PAXdb tissue integr.
DDX4	Q9NQI0	N/A	0.000363787	PAXdb tissue integr.
DDX4	Q9NQI0	N/A	0.00398671	PAXdb tissue integr.
DDX4	Q9NQI0	N/A	0.00198837	PAXdb tissue integr.
DDX4	Q9NQI0	N/A	0.00612957	PAXdb tissue integr.
POLR2A	P24928	N/A	0.134053	PAXdb tissue integr.
POLR2A	P24928	N/A	0.0802326	PAXdb tissue integr.
POLR2A	P24928	N/A	0.0278073	PAXdb tissue integr.
POLR2A	P24928	N/A	0.0921927	PAXdb tissue integr.
POLR2A	P24928	N/A	0.00782392	PAXdb tissue integr.
POLR2A	P24928	N/A	0.00931894	PAXdb tissue integr.
POLR2A	P24928	N/A	0.00627907	PAXdb tissue integr.
POLR2A	P24928	N/A	0.180399	PAXdb tissue integr.
POLR2A	P24928	N/A	0.0249169	PAXdb tissue integr.
POLR2A	P24928	N/A	0.0197841	PAXdb tissue integr.
POLR2A	P24928	N/A	0.000697674	PAXdb tissue integr.
POLR2A	P24928	N/A	0.0260631	PAXdb tissue integr.
POLR2A	P24928	N/A	0.0474419	PAXdb tissue integr.
POLR2A	P24928	N/A	0.0421096	PAXdb tissue integr.
POLR2A	P24928	N/A	0.0467442	PAXdb tissue integr.
POLR2A	P24928	N/A	0.0204319	PAXdb tissue integr.
POLR2A	P24928	N/A	0.00817276	PAXdb tissue integr.
MED1	Q15648	N/A	0.013505	PAXdb tissue integr.
MED1	Q15648	N/A	0.0113123	PAXdb tissue integr.
MED1	Q15648	N/A	0.0207309	PAXdb tissue integr.
MED1	Q15648	N/A	0.00235714	PAXdb tissue integr.
MED1	Q15648	N/A	0.000348837	PAXdb tissue integr.
MED1	Q15648	N/A	0.00707641	PAXdb tissue integr.
MED1	Q15648	N/A	0.000353821	PAXdb tissue integr.
MED1	Q15648	N/A	0.0122093	PAXdb tissue integr.
MED1	Q15648	N/A	0.00762458	PAXdb tissue integr.
MED1	Q15648	N/A	0.000508306	PAXdb tissue integr.
BRD4	O60885	N/A	0.0336379	PAXdb tissue integr.
BRD4	O60885	N/A	0.157973	PAXdb tissue integr.
BRD4	O60885	N/A	0.0672757	PAXdb tissue integr.
BRD4	O60885	N/A	0.0966777	PAXdb tissue integr.
BRD4	O60885	N/A	0.0772425	PAXdb tissue integr.
BRD4	O60885	N/A	0.16196	PAXdb tissue integr.
BRD4	O60885	N/A	0.00475415	PAXdb tissue integr.
BRD4	O60885	N/A	0.0182392	PAXdb tissue integr.
BRD4	O60885	N/A	0.00946844	PAXdb tissue integr.
BRD4	O60885	N/A	0.0109635	PAXdb tissue integr.
BRD4	O60885	N/A	0.0120598	PAXdb tissue integr.
BRD4	O60885	N/A	0.0231229	PAXdb tissue integr.
BRD4	O60885	N/A	0.00802326	PAXdb tissue integr.
BRD4	O60885	N/A	0.00548173	PAXdb tissue integr.
MYC	P01106	N/A	0.0137542	PAXdb tissue integr.
MYC	P01106	N/A	0.0013206	PAXdb tissue integr.
SOX2	P48431	N/A	0.00842193	PAXdb tissue integr.
SOX2	P48431	N/A	0.00722591	PAXdb tissue integr.
GATA2	P23769	N/A	0.00026412	PAXdb tissue integr.
GATA2	P23769	N/A	0.00146013	PAXdb tissue integr.
GATA2	P23769	N/A	0.010515	PAXdb tissue integr.
GATA2	P23769	N/A	0.00360797	PAXdb tissue integr.
GATA3	P23771	N/A	0.0121595	PAXdb tissue integr.
GATA3	P23771	N/A	0.00336877	PAXdb tissue integr.
GATA3	P23771	N/A	0.0013505	PAXdb tissue integr.
GATA3	P23771	N/A	0.000244186	PAXdb tissue integr.
RARA	P10276	N/A	0.00892027	PAXdb tissue integr.
RARA	P10276	N/A	0.00027907	PAXdb tissue integr.
RARA	P10276	N/A	0.00468937	PAXdb tissue integr.
RARA	P10276	N/A	0.00722591	PAXdb tissue integr.
NANOG	Q9H9S0	N/A	0.00170432	PAXdb tissue integr.
ESR1	P03372	N/A	0.00063289	PAXdb tissue integr.
ESR1	P03372	N/A	0.0259635	PAXdb tissue integr.
ESR1	P03372	N/A	0.000119601	PAXdb tissue integr.
ESR1	P03372	N/A	0.000244186	PAXdb tissue integr.
ESR1	P03372	N/A	0.0157973	PAXdb tissue integr.
NPM1	P06748	N/A	1.90365	PAXdb tissue integr.
NPM1	P06748	N/A	2.30233	PAXdb tissue integr.
NPM1	P06748	N/A	3.40365	PAXdb tissue integr.
NPM1	P06748	N/A	4.15615	PAXdb tissue integr.
NPM1	P06748	N/A	5.27741	PAXdb tissue integr.
NPM1	P06748	N/A	5.17276	PAXdb tissue integr.
NPM1	P06748	N/A	6.11462	PAXdb tissue integr.
NPM1	P06748	N/A	4.07641	PAXdb tissue integr.
NPM1	P06748	N/A	9.2093	PAXdb tissue integr.
NPM1	P06748	N/A	7.31561	PAXdb tissue integr.
NPM1	P06748	N/A	6.70764	PAXdb tissue integr.
NPM1	P06748	N/A	11.7409	PAXdb tissue integr.
NPM1	P06748	N/A	4.46512	PAXdb tissue integr.
NPM1	P06748	N/A	11.4817	PAXdb tissue integr.
NPM1	P06748	N/A	0.0100166	PAXdb tissue integr.
NPM1	P06748	N/A	3.02492	PAXdb tissue integr.
NPM1	P06748	N/A	1.78405	PAXdb tissue integr.
NPM1	P06748	N/A	0.220266	PAXdb tissue integr.
NPM1	P06748	N/A	1.50498	PAXdb tissue integr.
NPM1	P06748	N/A	1.39535	PAXdb tissue integr.
RPL5	P46777	N/A	0.637874	PAXdb tissue integr.
RPL5	P46777	N/A	1.45017	PAXdb tissue integr.
RPL5	P46777	N/A	1.83887	PAXdb tissue integr.
RPL5	P46777	N/A	0.283555	PAXdb tissue integr.
RPL5	P46777	N/A	0.123588	PAXdb tissue integr.
RPL5	P46777	N/A	0.518272	PAXdb tissue integr.
RPL5	P46777	N/A	2.45183	PAXdb tissue integr.
RPL5	P46777	N/A	1.57475	PAXdb tissue integr.
RPL5	P46777	N/A	2.55648	PAXdb tissue integr.
RPL5	P46777	N/A	3.12458	PAXdb tissue integr.
RPL5	P46777	N/A	2.23754	PAXdb tissue integr.
RPL5	P46777	N/A	5.39701	PAXdb tissue integr.
RPL5	P46777	N/A	0.336379	PAXdb tissue integr.
RPL5	P46777	N/A	1.26578	PAXdb tissue integr.
RPL5	P46777	N/A	0.0996678	PAXdb tissue integr.
RPL5	P46777	N/A	3.62791	PAXdb tissue integr.
RPL5	P46777	N/A	0.0127076	PAXdb tissue integr.
RPL5	P46777	N/A	0.032392	PAXdb tissue integr.
RPL5	P46777	N/A	0.107143	PAXdb tissue integr.
RPL5	P46777	N/A	0.415116	PAXdb tissue integr.
RPL23A	P62750	N/A	0.971761	PAXdb tissue integr.
RPL23A	P62750	N/A	1.61462	PAXdb tissue integr.
RPL23A	P62750	N/A	2.29734	PAXdb tissue integr.
RPL23A	P62750	N/A	2.30233	PAXdb tissue integr.
RPL23A	P62750	N/A	2.07309	PAXdb tissue integr.
RPL23A	P62750	N/A	1.8588	PAXdb tissue integr.
RPL23A	P62750	N/A	4.10631	PAXdb tissue integr.
RPL23A	P62750	N/A	3.27907	PAXdb tissue integr.
RPL23A	P62750	N/A	3.65781	PAXdb tissue integr.
RPL23A	P62750	N/A	2.26744	PAXdb tissue integr.
RPL23A	P62750	N/A	4.51993	PAXdb tissue integr.
RPL23A	P62750	N/A	1.33555	PAXdb tissue integr.
RPL23A	P62750	N/A	6.90698	PAXdb tissue integr.
RPL23A	P62750	N/A	4.13621	PAXdb tissue integr.
RPL23A	P62750	N/A	0.0951827	PAXdb tissue integr.
RPL23A	P62750	N/A	0.752492	PAXdb tissue integr.
RPL23A	P62750	N/A	1.0814	PAXdb tissue integr.
RPL23A	P62750	N/A	0.00449502	PAXdb tissue integr.
RPL23A	P62750	N/A	0.127575	PAXdb tissue integr.
SURF6	O75683	N/A	0.030598	PAXdb tissue integr.
SURF6	O75683	N/A	0.163455	PAXdb tissue integr.
SURF6	O75683	N/A	0.183389	PAXdb tissue integr.
SURF6	O75683	N/A	0.047392	PAXdb tissue integr.
SURF6	O75683	N/A	0.199336	PAXdb tissue integr.
SURF6	O75683	N/A	0.00642857	PAXdb tissue integr.
SURF6	O75683	N/A	0.0543189	PAXdb tissue integr.
SURF6	O75683	N/A	0.000797342	PAXdb tissue integr.
SURF6	O75683	N/A	0.00548173	PAXdb tissue integr.
SURF6	O75683	N/A	0.00612957	PAXdb tissue integr.
SURF6	O75683	N/A	0.00717608	PAXdb tissue integr.
GNL2	Q13823	N/A	0.0316445	PAXdb tissue integr.
GNL2	Q13823	N/A	0.00981728	PAXdb tissue integr.
GNL2	Q13823	N/A	0.0732558	PAXdb tissue integr.
GNL2	Q13823	N/A	0.00777409	PAXdb tissue integr.
GNL2	Q13823	N/A	0.00931894	PAXdb tissue integr.
GNL2	Q13823	N/A	0.00672757	PAXdb tissue integr.
GNL2	Q13823	N/A	0.0553156	PAXdb tissue integr.
GNL2	Q13823	N/A	0.0239203	PAXdb tissue integr.
GNL2	Q13823	N/A	0.0272093	PAXdb tissue integr.
GNL2	Q13823	N/A	0.0225748	PAXdb tissue integr.
CBX2	Q14781	N/A	0.00682724	PAXdb tissue integr.
CBX2	Q14781	N/A	0.0061794	PAXdb tissue integr.
CBX2	Q14781	N/A	0.00359302	PAXdb tissue integr.
CBX2	Q14781	N/A	0.000622924	PAXdb tissue integr.
CBX5	P45973	N/A	0.324419	PAXdb tissue integr.
CBX5	P45973	N/A	0.061794	PAXdb tissue integr.
CBX5	P45973	N/A	0.159967	PAXdb tissue integr.
CBX5	P45973	N/A	0.139037	PAXdb tissue integr.
CBX5	P45973	N/A	0.130565	PAXdb tissue integr.
CBX5	P45973	N/A	0.0314452	PAXdb tissue integr.
CBX5	P45973	N/A	0.160465	PAXdb tissue integr.
CBX5	P45973	N/A	0.206312	PAXdb tissue integr.
CBX5	P45973	N/A	1.12126	PAXdb tissue integr.
CBX5	P45973	N/A	0.455482	PAXdb tissue integr.
CBX5	P45973	N/A	0.0419601	PAXdb tissue integr.
CBX5	P45973	N/A	0.174917	PAXdb tissue integr.
CBX5	P45973	N/A	1.51993	PAXdb tissue integr.
CBX5	P45973	N/A	0.333389	PAXdb tissue integr.
CBX5	P45973	N/A	0.0328405	PAXdb tissue integr.
CBX5	P45973	N/A	0.247674	PAXdb tissue integr.
CBX5	P45973	N/A	0.503322	PAXdb tissue integr.
CGAS	Q8N884	N/A	2.99003e-05	PAXdb tissue integr.
CGAS	Q8N884	N/A	1.99336e-05	PAXdb tissue integr.
CGAS	Q8N884	N/A	0.00538206	PAXdb tissue integr.
MORC3	Q14149	N/A	0.0278571	PAXdb tissue integr.
MORC3	Q14149	N/A	0.0191362	PAXdb tissue integr.
MORC3	Q14149	N/A	0.00518272	PAXdb tissue integr.
MORC3	Q14149	N/A	5.48173e-05	PAXdb tissue integr.
MORC3	Q14149	N/A	7.47508e-05	PAXdb tissue integr.
MORC3	Q14149	N/A	3.48837e-05	PAXdb tissue integr.
MORC3	Q14149	N/A	0.0149502	PAXdb tissue integr.
MORC3	Q14149	N/A	9.96678e-06	PAXdb tissue integr.
MORC3	Q14149	N/A	0.00227243	PAXdb tissue integr.
MORC3	Q14149	N/A	0.0323422	PAXdb tissue integr.
MORC3	Q14149	N/A	0.0302492	PAXdb tissue integr.
MORC3	Q14149	N/A	0.000827243	PAXdb tissue integr.
MORC3	Q14149	N/A	0.0128073	PAXdb tissue integr.
MORC3	Q14149	N/A	0.0122591	PAXdb tissue integr.
TP53BP1	Q12888	N/A	0.0333887	PAXdb tissue integr.
TP53BP1	Q12888	N/A	0.0342359	PAXdb tissue integr.
TP53BP1	Q12888	N/A	0.0353821	PAXdb tissue integr.
TP53BP1	Q12888	N/A	0.2701	PAXdb tissue integr.
TP53BP1	Q12888	N/A	0.0652824	PAXdb tissue integr.
TP53BP1	Q12888	N/A	0.106645	PAXdb tissue integr.
TP53BP1	Q12888	N/A	0.00523256	PAXdb tissue integr.
TP53BP1	Q12888	N/A	0.086711	PAXdb tissue integr.
TP53BP1	Q12888	N/A	0.0176412	PAXdb tissue integr.
TP53BP1	Q12888	N/A	0.0171429	PAXdb tissue integr.
TP53BP1	Q12888	N/A	0.0166445	PAXdb tissue integr.
TP53BP1	Q12888	N/A	0.0197841	PAXdb tissue integr.
TP53BP1	Q12888	N/A	0.342359	PAXdb tissue integr.
TP53BP1	Q12888	N/A	0.000762458	PAXdb tissue integr.
TP53BP1	Q12888	N/A	0.0457475	PAXdb tissue integr.
TP53BP1	Q12888	N/A	0.00857143	PAXdb tissue integr.
TP53BP1	Q12888	N/A	0.0303488	PAXdb tissue integr.
NPHS1	O60500	N/A	0.296512	PAXdb tissue integr.
NPHS1	O60500	N/A	3.48837e-05	PAXdb tissue integr.
NPHS1	O60500	N/A	0.013804	PAXdb tissue integr.
NPHS1	O60500	N/A	0.0174419	PAXdb tissue integr.
NCK1	P16333	N/A	0.124585	PAXdb tissue integr.
NCK1	P16333	N/A	0.209801	PAXdb tissue integr.
NCK1	P16333	N/A	0.123588	PAXdb tissue integr.
NCK1	P16333	N/A	0.13804	PAXdb tissue integr.
NCK1	P16333	N/A	0.242193	PAXdb tissue integr.
NCK1	P16333	N/A	0.0872093	PAXdb tissue integr.
NCK1	P16333	N/A	0.119103	PAXdb tissue integr.
NCK1	P16333	N/A	0.231229	PAXdb tissue integr.
NCK1	P16333	N/A	0.0094186	PAXdb tissue integr.
NCK1	P16333	N/A	0.0692691	PAXdb tissue integr.
NCK1	P16333	N/A	0.0058804	PAXdb tissue integr.
NCK1	P16333	N/A	0.0141528	PAXdb tissue integr.
NCK1	P16333	N/A	0.00333389	PAXdb tissue integr.
NCK1	P16333	N/A	0.0260631	PAXdb tissue integr.
NCK1	P16333	N/A	0.0432558	PAXdb tissue integr.
NCK1	P16333	N/A	0.25515	PAXdb tissue integr.
NCK1	P16333	N/A	0.0107641	PAXdb tissue integr.
WASL	O00401	N/A	0.217774	PAXdb tissue integr.
WASL	O00401	N/A	0.265116	PAXdb tissue integr.
WASL	O00401	N/A	0.146013	PAXdb tissue integr.
WASL	O00401	N/A	0.454983	PAXdb tissue integr.
WASL	O00401	N/A	0.031196	PAXdb tissue integr.
WASL	O00401	N/A	0.00553156	PAXdb tissue integr.
WASL	O00401	N/A	0.0951827	PAXdb tissue integr.
WASL	O00401	N/A	0.0627907	PAXdb tissue integr.
WASL	O00401	N/A	0.0607973	PAXdb tissue integr.
WASL	O00401	N/A	0.0191362	PAXdb tissue integr.
WASL	O00401	N/A	0.0797342	PAXdb tissue integr.
WASL	O00401	N/A	0.229734	PAXdb tissue integr.
WASL	O00401	N/A	0.154983	PAXdb tissue integr.
WASL	O00401	N/A	4.98339e-05	PAXdb tissue integr.
WASL	O00401	N/A	0.012907	PAXdb tissue integr.
WASL	O00401	N/A	0.0058804	PAXdb tissue integr.
WASL	O00401	N/A	0.0223256	PAXdb tissue integr.
WASL	O00401	N/A	0.0172924	PAXdb tissue integr.
WASL	O00401	N/A	0.0315449	PAXdb tissue integr.
LAT	O43561	N/A		PAXdb tissue integr.
GRB2	P62993	N/A	0.568106	PAXdb tissue integr.
GRB2	P62993	N/A	1.53488	PAXdb tissue integr.
GRB2	P62993	N/A	0.697674	PAXdb tissue integr.
GRB2	P62993	N/A	1.26578	PAXdb tissue integr.
GRB2	P62993	N/A	1.37043	PAXdb tissue integr.
GRB2	P62993	N/A	1.42027	PAXdb tissue integr.
GRB2	P62993	N/A	0.86711	PAXdb tissue integr.
GRB2	P62993	N/A	1.50498	PAXdb tissue integr.
GRB2	P62993	N/A	1.09136	PAXdb tissue integr.
GRB2	P62993	N/A	1.94352	PAXdb tissue integr.
GRB2	P62993	N/A	2.08804	PAXdb tissue integr.
GRB2	P62993	N/A	1.55482	PAXdb tissue integr.
GRB2	P62993	N/A	0.0752492	PAXdb tissue integr.
GRB2	P62993	N/A	0.00782392	PAXdb tissue integr.
GRB2	P62993	N/A	0.971761	PAXdb tissue integr.
GRB2	P62993	N/A	1.13621	PAXdb tissue integr.
GRB2	P62993	N/A	0.147508	PAXdb tissue integr.
GRB2	P62993	N/A	0.207309	PAXdb tissue integr.
GRB2	P62993	N/A	0.289535	PAXdb tissue integr.
GRB2	P62993	N/A	1.0515	PAXdb tissue integr.
GRB2	P62993	N/A	1.18605	PAXdb tissue integr.
SOS1	Q07889	N/A	0.0752492	PAXdb tissue integr.
SOS1	Q07889	N/A	2.49169e-05	PAXdb tissue integr.
SOS1	Q07889	N/A	0.0548173	PAXdb tissue integr.
SOS1	Q07889	N/A	0.0139037	PAXdb tissue integr.
SOS1	Q07889	N/A	0.0109136	PAXdb tissue integr.
SOS1	Q07889	N/A	0.0463455	PAXdb tissue integr.
SOS1	Q07889	N/A	0.0228738	PAXdb tissue integr.
SOS1	Q07889	N/A	0.000154485	PAXdb tissue integr.
SOS1	Q07889	N/A	0.00486379	PAXdb tissue integr.
SOS1	Q07889	N/A	0.00513289	PAXdb tissue integr.
SOS1	Q07889	N/A	0.0399169	PAXdb tissue integr.
SOS1	Q07889	N/A	0.00239701	PAXdb tissue integr.
SOS1	Q07889	N/A	0.00399169	PAXdb tissue integr.
SOS1	Q07889	N/A	0.00460963	PAXdb tissue integr.
SOS1	Q07889	N/A	0.000508306	PAXdb tissue integr.
GRAP2	O75791	N/A	0.00321927	PAXdb tissue integr.
GRAP2	O75791	N/A	0.94186	PAXdb tissue integr.
GRAP2	O75791	N/A	0.0747508	PAXdb tissue integr.
GRAP2	O75791	N/A	0.0672757	PAXdb tissue integr.
LCP2	Q13094	N/A	0.0438538	PAXdb tissue integr.
LCP2	Q13094	N/A	0.102658	PAXdb tissue integr.
LCP2	Q13094	N/A	1.30066	PAXdb tissue integr.
LCP2	Q13094	N/A	0.044701	PAXdb tissue integr.
LCP2	Q13094	N/A	6.47841e-05	PAXdb tissue integr.
LCP2	Q13094	N/A	0.00266611	PAXdb tissue integr.
LCP2	Q13094	N/A	0.00936877	PAXdb tissue integr.
LCP2	Q13094	N/A	0.0249668	PAXdb tissue integr.
LCP2	Q13094	N/A	0.0286545	PAXdb tissue integr.
LCP2	Q13094	N/A	0.0578073	PAXdb tissue integr.
LCP2	Q13094	N/A	0.000827243	PAXdb tissue integr.
LCP2	Q13094	N/A	0.00498339	PAXdb tissue integr.
LCP2	Q13094	N/A	0.00138538	PAXdb tissue integr.
LCP2	Q13094	N/A	0.0183887	PAXdb tissue integr.
SYNGAP1	Q96PV0	N/A	0.18289	PAXdb tissue integr.
SYNGAP1	Q96PV0	N/A	1.49502e-05	PAXdb tissue integr.
SYNGAP1	Q96PV0	N/A	3.98671e-05	PAXdb tissue integr.
SYNGAP1	Q96PV0	N/A	2.99003e-05	PAXdb tissue integr.
SYNGAP1	Q96PV0	N/A	0.349336	PAXdb tissue integr.
SYNGAP1	Q96PV0	N/A	8.47176e-05	PAXdb tissue integr.
SYNGAP1	Q96PV0	N/A	0.00163455	PAXdb tissue integr.
SYNGAP1	Q96PV0	N/A	0.0301495	PAXdb tissue integr.
SYNGAP1	Q96PV0	N/A	0.000144518	PAXdb tissue integr.
SYNGAP1	Q96PV0	N/A	0.00486877	PAXdb tissue integr.
SYNGAP1	Q96PV0	N/A	0.000503322	PAXdb tissue integr.
DLG4	P78352	N/A	0.0418106	PAXdb tissue integr.
DLG4	P78352	N/A	1.10133	PAXdb tissue integr.
DLG4	P78352	N/A	0.00470432	PAXdb tissue integr.
DLG4	P78352	N/A	0.00424585	PAXdb tissue integr.
DLG4	P78352	N/A	0.00219269	PAXdb tissue integr.
DLG4	P78352	N/A	0.0293023	PAXdb tissue integr.
DLG4	P78352	N/A	0.0141528	PAXdb tissue integr.
DLG4	P78352	N/A	0.000229236	PAXdb tissue integr.
DLG4	P78352	N/A	0.000762458	PAXdb tissue integr.
DLG4	P78352	N/A	0.015299	PAXdb tissue integr.
DLG4	P78352	N/A	0.00236213	PAXdb tissue integr.
DLG4	P78352	N/A	0.0142525	PAXdb tissue integr.
DLG4	P78352	N/A	0.0169435	PAXdb tissue integr.
DLG4	P78352	N/A	0.00247176	PAXdb tissue integr.
DLG4	P78352	N/A	0.00712625	PAXdb tissue integr.
DLG4	P78352	N/A	0.00872093	PAXdb tissue integr.
DLG4	P78352	N/A	0.00563123	PAXdb tissue integr.
HOMER3	Q9NSC5	N/A	0.0185382	PAXdb tissue integr.
HOMER3	Q9NSC5	N/A	0.061794	PAXdb tissue integr.
HOMER3	Q9NSC5	N/A	0.0171429	PAXdb tissue integr.
HOMER3	Q9NSC5	N/A	0.00687708	PAXdb tissue integr.
HOMER3	Q9NSC5	N/A	0.0195349	PAXdb tissue integr.
HOMER3	Q9NSC5	N/A	0.001799	PAXdb tissue integr.
HOMER3	Q9NSC5	N/A	0.0578073	PAXdb tissue integr.
HOMER3	Q9NSC5	N/A	0.00862126	PAXdb tissue integr.
HOMER3	Q9NSC5	N/A	0.00246678	PAXdb tissue integr.
HOMER3	Q9NSC5	N/A	0.0220764	PAXdb tissue integr.
HOMER3	Q9NSC5	N/A	0.0122093	PAXdb tissue integr.
HOMER3	Q9NSC5	N/A	0.0025515	PAXdb tissue integr.
SYN1	P17600	N/A	0.0025814	PAXdb tissue integr.
SYN1	P17600	N/A	0.0921927	PAXdb tissue integr.
SYN1	P17600	N/A	0.0657807	PAXdb tissue integr.
SYN1	P17600	N/A	0.00528239	PAXdb tissue integr.
SYN1	P17600	N/A	0.00483887	PAXdb tissue integr.
SYN1	P17600	N/A	0.00437542	PAXdb tissue integr.
SYN1	P17600	N/A	0.000787375	PAXdb tissue integr.
SYN1	P17600	N/A	0.058804	PAXdb tissue integr.
SYN1	P17600	N/A	0.0121595	PAXdb tissue integr.
SYN1	P17600	N/A	22.8688	PAXdb tissue integr.
SYN1	P17600	N/A	0.0204817	PAXdb tissue integr.
SYN2	Q92777	N/A		PAXdb tissue integr.
NUP98	P52948	N/A	0.0320432	PAXdb tissue integr.
NUP98	P52948	N/A	0.199834	PAXdb tissue integr.
NUP98	P52948	N/A	0.0677741	PAXdb tissue integr.
NUP98	P52948	N/A	0.199336	PAXdb tissue integr.
NUP98	P52948	N/A	0.0140033	PAXdb tissue integr.
NUP98	P52948	N/A	0.174419	PAXdb tissue integr.
NUP98	P52948	N/A	0.0528239	PAXdb tissue integr.
NUP98	P52948	N/A	0.166445	PAXdb tissue integr.
NUP98	P52948	N/A	0.0256146	PAXdb tissue integr.
NUP98	P52948	N/A	0.0275581	PAXdb tissue integr.
NUP98	P52948	N/A	0.235216	PAXdb tissue integr.
NUP98	P52948	N/A	0.0125581	PAXdb tissue integr.
NUP98	P52948	N/A	0.043804	PAXdb tissue integr.
NUP98	P52948	N/A	0.0612957	PAXdb tissue integr.
NUP98	P52948	N/A	0.00390199	PAXdb tissue integr.
NUP98	P52948	N/A	0.0787375	PAXdb tissue integr.
NUP98	P52948	N/A	0.00094186	PAXdb tissue integr.
NUP153	P49790	N/A	0.154983	PAXdb tissue integr.
NUP153	P49790	N/A	0.017691	PAXdb tissue integr.
NUP153	P49790	N/A	4.48505e-05	PAXdb tissue integr.
NUP153	P49790	N/A	0.00622924	PAXdb tissue integr.
NUP153	P49790	N/A	0.107641	PAXdb tissue integr.
NUP153	P49790	N/A	0.134053	PAXdb tissue integr.
NUP153	P49790	N/A	0.0205814	PAXdb tissue integr.
NUP153	P49790	N/A	0.186877	PAXdb tissue integr.
NUP153	P49790	N/A	0.0214286	PAXdb tissue integr.
NUP153	P49790	N/A	0.102159	PAXdb tissue integr.
NUP153	P49790	N/A	0.00961794	PAXdb tissue integr.
NUP153	P49790	N/A	0.0107143	PAXdb tissue integr.
NUP153	P49790	N/A	0.00454485	PAXdb tissue integr.
NUP153	P49790	N/A	0.000508306	PAXdb tissue integr.
AGO2	Q9UKV8	N/A	0.0439535	PAXdb tissue integr.
AGO2	Q9UKV8	N/A	0.0712625	PAXdb tissue integr.
AGO2	Q9UKV8	N/A	0.0155482	PAXdb tissue integr.
AGO2	Q9UKV8	N/A	0.60299	PAXdb tissue integr.
AGO2	Q9UKV8	N/A	0.298505	PAXdb tissue integr.
AGO2	Q9UKV8	N/A	0.57309	PAXdb tissue integr.
AGO2	Q9UKV8	N/A	0.165449	PAXdb tissue integr.
AGO2	Q9UKV8	N/A	0.523256	PAXdb tissue integr.
AGO2	Q9UKV8	N/A	0.0172425	PAXdb tissue integr.
AGO2	Q9UKV8	N/A	0.235216	PAXdb tissue integr.
AGO2	Q9UKV8	N/A	0.0150498	PAXdb tissue integr.
AGO2	Q9UKV8	N/A	0.134053	PAXdb tissue integr.
AGO2	Q9UKV8	N/A	0.468937	PAXdb tissue integr.
AGO2	Q9UKV8	N/A	0.0198837	PAXdb tissue integr.
AGO2	Q9UKV8	N/A	0.0622924	PAXdb tissue integr.
AGO2	Q9UKV8	N/A	0.00343355	PAXdb tissue integr.
AGO2	Q9UKV8	N/A	0.0106645	PAXdb tissue integr.
AGO2	Q9UKV8	N/A	0.00088206	PAXdb tissue integr.
TNRC6B	Q9UPQ9	N/A	0.0010814	PAXdb tissue integr.
TNRC6B	Q9UPQ9	N/A	0.00887043	PAXdb tissue integr.
TNRC6B	Q9UPQ9	N/A	0.000578073	PAXdb tissue integr.
TNRC6B	Q9UPQ9	N/A	0.00215282	PAXdb tissue integr.
TNRC6B	Q9UPQ9	N/A	0.00057309	PAXdb tissue integr.
TNRC6B	Q9UPQ9	N/A	0.0150997	PAXdb tissue integr.
TNRC6B	Q9UPQ9	N/A	0.00169435	PAXdb tissue integr.
TNRC6B	Q9UPQ9	N/A	0.00682724	PAXdb tissue integr.
TNRC6B	Q9UPQ9	N/A	0.00195847	PAXdb tissue integr.
TNRC6B	Q9UPQ9	N/A	0.00951827	PAXdb tissue integr.
TNRC6B	Q9UPQ9	N/A	0.00336877	PAXdb tissue integr.
TNRC6B	Q9UPQ9	N/A	0.000797342	PAXdb tissue integr.
TNRC6B	Q9UPQ9	N/A	0.00961794	PAXdb tissue integr.
TNRC6B	Q9UPQ9	N/A	0.000433555	PAXdb tissue integr.
TNRC6B	Q9UPQ9	N/A	0.0030598	PAXdb tissue integr.
SPOP	O43791	N/A	0.00466944	PAXdb tissue integr.
SPOP	O43791	N/A	0.00538206	PAXdb tissue integr.
SPOP	O43791	N/A	0.000299003	PAXdb tissue integr.
DAXX	Q9UER7	N/A	0.0647841	PAXdb tissue integr.
DAXX	Q9UER7	N/A	0.0124585	PAXdb tissue integr.
DAXX	Q9UER7	N/A	0.0104153	PAXdb tissue integr.
DAXX	Q9UER7	N/A	0.0181894	PAXdb tissue integr.
DAXX	Q9UER7	N/A	0.0125581	PAXdb tissue integr.
DAXX	Q9UER7	N/A	0.055814	PAXdb tissue integr.
DAXX	Q9UER7	N/A	0.0250664	PAXdb tissue integr.
DAXX	Q9UER7	N/A	0.0029402	PAXdb tissue integr.
DAXX	Q9UER7	N/A	0.00139535	PAXdb tissue integr.
AR	P10275	N/A	0.0217774	PAXdb tissue integr.
AR	P10275	N/A	0.0149502	PAXdb tissue integr.
AR	P10275	N/A	0.0042907	PAXdb tissue integr.
AR	P10275	N/A	0.0173422	PAXdb tissue integr.
AR	P10275	N/A	0.0473422	PAXdb tissue integr.
AR	P10275	N/A	0.00812292	PAXdb tissue integr.
UBQLN2	Q9UHD9	N/A	0.712625	PAXdb tissue integr.
UBQLN2	Q9UHD9	N/A	0.0495349	PAXdb tissue integr.
UBQLN2	Q9UHD9	N/A	1.3505	PAXdb tissue integr.
UBQLN2	Q9UHD9	N/A	0.134053	PAXdb tissue integr.
UBQLN2	Q9UHD9	N/A	0.747508	PAXdb tissue integr.
UBQLN2	Q9UHD9	N/A	0.475415	PAXdb tissue integr.
UBQLN2	Q9UHD9	N/A	0.627907	PAXdb tissue integr.
UBQLN2	Q9UHD9	N/A	0.315947	PAXdb tissue integr.
UBQLN2	Q9UHD9	N/A	0.657807	PAXdb tissue integr.
UBQLN2	Q9UHD9	N/A	0.000154485	PAXdb tissue integr.
UBQLN2	Q9UHD9	N/A	0.0852159	PAXdb tissue integr.
UBQLN2	Q9UHD9	N/A	0.061794	PAXdb tissue integr.
UBQLN2	Q9UHD9	N/A	0.258638	PAXdb tissue integr.
UBQLN2	Q9UHD9	N/A	0.055814	PAXdb tissue integr.
UBQLN2	Q9UHD9	N/A	0.146512	PAXdb tissue integr.
UBQLN2	Q9UHD9	N/A	0.250166	PAXdb tissue integr.
UBQLN2	Q9UHD9	N/A	0.214286	PAXdb tissue integr.
UBQLN2	Q9UHD9	N/A	0.60299	PAXdb tissue integr.
SQSTM1	Q13501	N/A	0.0777409	PAXdb tissue integr.
SQSTM1	Q13501	N/A	0.160963	PAXdb tissue integr.
SQSTM1	Q13501	N/A	0.149502	PAXdb tissue integr.
SQSTM1	Q13501	N/A	0.0155482	PAXdb tissue integr.
SQSTM1	Q13501	N/A	0.0662791	PAXdb tissue integr.
SQSTM1	Q13501	N/A	0.0852159	PAXdb tissue integr.
SQSTM1	Q13501	N/A	0.206312	PAXdb tissue integr.
SQSTM1	Q13501	N/A	0.122591	PAXdb tissue integr.
SQSTM1	Q13501	N/A	0.284551	PAXdb tissue integr.
SQSTM1	Q13501	N/A	0.0124585	PAXdb tissue integr.
SQSTM1	Q13501	N/A	0.0837209	PAXdb tissue integr.
SQSTM1	Q13501	N/A	0.0363787	PAXdb tissue integr.
SQSTM1	Q13501	N/A	0.0331395	PAXdb tissue integr.
SQSTM1	Q13501	N/A	0.0260133	PAXdb tissue integr.
SQSTM1	Q13501	N/A	0.00498339	PAXdb tissue integr.
SQSTM1	Q13501	N/A	0.0169435	PAXdb tissue integr.
SQSTM1	Q13501	N/A	0.16495	PAXdb tissue integr.
UBC	P0CG48	N/A	0.782392	PAXdb tissue integr.
UBC	P0CG48	N/A	0.707641	PAXdb tissue integr.
UBC	P0CG48	N/A	1.25581	PAXdb tissue integr.
UBC	P0CG48	N/A	3.27409	PAXdb tissue integr.
UBC	P0CG48	N/A	0.583056	PAXdb tissue integr.
UBC	P0CG48	N/A	0.667774	PAXdb tissue integr.
UBC	P0CG48	N/A	0.637874	PAXdb tissue integr.
UBC	P0CG48	N/A	0.727575	PAXdb tissue integr.
UBC	P0CG48	N/A	1.21096	PAXdb tissue integr.
UBC	P0CG48	N/A	1.42525	PAXdb tissue integr.
UBC	P0CG48	N/A	0.852159	PAXdb tissue integr.
UBC	P0CG48	N/A	0.877076	PAXdb tissue integr.
UBC	P0CG48	N/A	0.297508	PAXdb tissue integr.
UBC	P0CG48	N/A	0.0812292	PAXdb tissue integr.
UBC	P0CG48	N/A	0.372757	PAXdb tissue integr.
UBC	P0CG48	N/A	0.424585	PAXdb tissue integr.
UBC	P0CG48	N/A	1.03654	PAXdb tissue integr.
UBC	P0CG48	N/A	0.687708	PAXdb tissue integr.
UBC	P0CG48	N/A	0.89701	PAXdb tissue integr.
UBC	P0CG48	N/A	0.936877	PAXdb tissue integr.
CCNT1	O60563	N/A	0.0354319	PAXdb tissue integr.
CCNT1	O60563	N/A	0.0088206	PAXdb tissue integr.
CCNT1	O60563	N/A	0.000598007	PAXdb tissue integr.
CCNT1	O60563	N/A	0.000129568	PAXdb tissue integr.
CCNT1	O60563	N/A	0.00168937	PAXdb tissue integr.
CCNT1	O60563	N/A	0.0181894	PAXdb tissue integr.
CCNT1	O60563	N/A	0.000244186	PAXdb tissue integr.
CCNT1	O60563	N/A	0.018887	PAXdb tissue integr.
DYRK1A	Q13627	N/A	0.0862126	PAXdb tissue integr.
DYRK1A	Q13627	N/A	1.99336e-05	PAXdb tissue integr.
DYRK1A	Q13627	N/A	4.48505e-05	PAXdb tissue integr.
DYRK1A	Q13627	N/A	0.0119103	PAXdb tissue integr.
DYRK1A	Q13627	N/A	0.0115116	PAXdb tissue integr.
DYRK1A	Q13627	N/A	0.00593023	PAXdb tissue integr.
DYRK1A	Q13627	N/A	0.0126578	PAXdb tissue integr.
DYRK1A	Q13627	N/A	0.0209801	PAXdb tissue integr.
DYRK1A	Q13627	N/A	0.0112625	PAXdb tissue integr.
DYRK1A	Q13627	N/A	0.0219269	PAXdb tissue integr.
DYRK1A	Q13627	N/A	0.00445515	PAXdb tissue integr.
DYRK1A	Q13627	N/A	0.0293023	PAXdb tissue integr.
MAPT	P10636	N/A	0.413621	PAXdb tissue integr.
MAPT	P10636	N/A	0.121595	PAXdb tissue integr.
MAPT	P10636	N/A	0.234219	PAXdb tissue integr.
MAPT	P10636	N/A	0.000528239	PAXdb tissue integr.
MAPT	P10636	N/A	0.0802326	PAXdb tissue integr.
MAPT	P10636	N/A	0.14701	PAXdb tissue integr.
MAPT	P10636	N/A	4.19601	PAXdb tissue integr.
MAPT	P10636	N/A	0.216777	PAXdb tissue integr.
MAPT	P10636	N/A	0.0207309	PAXdb tissue integr.
MAPT	P10636	N/A	0.0136047	PAXdb tissue integr.
MAPT	P10636	N/A	0.0145017	PAXdb tissue integr.
MAPT	P10636	N/A	0.045598	PAXdb tissue integr.
MAPT	P10636	N/A	0.012907	PAXdb tissue integr.
PRNP	P04156	N/A	0.013505	PAXdb tissue integr.
PRNP	P04156	N/A	0.0637874	PAXdb tissue integr.
PRNP	P04156	N/A	1.47508	PAXdb tissue integr.
PRNP	P04156	N/A	0.627907	PAXdb tissue integr.
PRNP	P04156	N/A	0.320432	PAXdb tissue integr.
PRNP	P04156	N/A	0.508306	PAXdb tissue integr.
PRNP	P04156	N/A	0.127575	PAXdb tissue integr.
PRNP	P04156	N/A	0.318937	PAXdb tissue integr.
PRNP	P04156	N/A	0.0248173	PAXdb tissue integr.
PRNP	P04156	N/A	0.637874	PAXdb tissue integr.
PRNP	P04156	N/A	0.000378738	PAXdb tissue integr.
PRNP	P04156	N/A	0.419103	PAXdb tissue integr.
PRNP	P04156	N/A	0.106645	PAXdb tissue integr.
PRNP	P04156	N/A	0.466445	PAXdb tissue integr.
PRNP	P04156	N/A	0.230731	PAXdb tissue integr.
PRNP	P04156	N/A	0.00802326	PAXdb tissue integr.
PRNP	P04156	N/A	0.217276	PAXdb tissue integr.
PRNP	P04156	N/A	0.137043	PAXdb tissue integr.
PRNP	P04156	N/A	0.202824	PAXdb tissue integr.
PRNP	P04156	N/A	0.0742525	PAXdb tissue integr.
APP	P05067	N/A	0.0732558	PAXdb tissue integr.
APP	P05067	N/A	0.330399	PAXdb tissue integr.
APP	P05067	N/A	0.0243688	PAXdb tissue integr.
APP	P05067	N/A	0.00727575	PAXdb tissue integr.
APP	P05067	N/A	0.0812292	PAXdb tissue integr.
APP	P05067	N/A	0.0662791	PAXdb tissue integr.
APP	P05067	N/A	1.58472	PAXdb tissue integr.
APP	P05067	N/A	0.00115116	PAXdb tissue integr.
APP	P05067	N/A	0.0165947	PAXdb tissue integr.
APP	P05067	N/A	0.134551	PAXdb tissue integr.
APP	P05067	N/A	0.145515	PAXdb tissue integr.
APP	P05067	N/A	0.0383721	PAXdb tissue integr.
APP	P05067	N/A	0.055814	PAXdb tissue integr.
APP	P05067	N/A	0.415116	PAXdb tissue integr.
APP	P05067	N/A	0.0273588	PAXdb tissue integr.
APP	P05067	N/A	0.49186	PAXdb tissue integr.
APP	P05067	N/A	0.00508306	PAXdb tissue integr.
VHL	P40337	N/A	0.13804	PAXdb tissue integr.
VHL	P40337	N/A	0.0016196	PAXdb tissue integr.
VHL	P40337	N/A	0.00538206	PAXdb tissue integr.
VHL	P40337	N/A	0.0518272	PAXdb tissue integr.
VHL	P40337	N/A	0.00508306	PAXdb tissue integr.
LGALS3	P17931	N/A	0.471429	PAXdb tissue integr.
LGALS3	P17931	N/A	1.72924	PAXdb tissue integr.
LGALS3	P17931	N/A	2.91528	PAXdb tissue integr.
LGALS3	P17931	N/A	2.62126	PAXdb tissue integr.
LGALS3	P17931	N/A	2.8206	PAXdb tissue integr.
LGALS3	P17931	N/A	5.73588	PAXdb tissue integr.
LGALS3	P17931	N/A	5.50664	PAXdb tissue integr.
LGALS3	P17931	N/A	6.31395	PAXdb tissue integr.
LGALS3	P17931	N/A	8.89037	PAXdb tissue integr.
LGALS3	P17931	N/A	7.2608	PAXdb tissue integr.
LGALS3	P17931	N/A	1.26578	PAXdb tissue integr.
LGALS3	P17931	N/A	11.4319	PAXdb tissue integr.
LGALS3	P17931	N/A	12.2342	PAXdb tissue integr.
LGALS3	P17931	N/A	13.0316	PAXdb tissue integr.
LGALS3	P17931	N/A	4.29568	PAXdb tissue integr.
LGALS3	P17931	N/A	1.01661	PAXdb tissue integr.
LGALS3	P17931	N/A	4.63953	PAXdb tissue integr.
LGALS3	P17931	N/A	0.0212292	PAXdb tissue integr.
LGALS3	P17931	N/A	1.54983	PAXdb tissue integr.
LGALS3	P17931	N/A	0.043505	PAXdb tissue integr.
LGALS3	P17931	N/A	4.16113	PAXdb tissue integr.
ELN	P15502	N/A	0.0226246	PAXdb tissue integr.
ELN	P15502	N/A	0.513289	PAXdb tissue integr.
ELN	P15502	N/A	0.553156	PAXdb tissue integr.
ELN	P15502	N/A	0.0538206	PAXdb tissue integr.
ELN	P15502	N/A	0.207807	PAXdb tissue integr.
ELN	P15502	N/A	0.200332	PAXdb tissue integr.
ELN	P15502	N/A	1.10631	PAXdb tissue integr.
ELN	P15502	N/A	0.311462	PAXdb tissue integr.
ELN	P15502	N/A	0.0227741	PAXdb tissue integr.
ELN	P15502	N/A	0.1201	PAXdb tissue integr.
ELN	P15502	N/A	0.168937	PAXdb tissue integr.
ELN	P15502	N/A	0.333389	PAXdb tissue integr.
ELN	P15502	N/A	0.224751	PAXdb tissue integr.
ELN	P15502	N/A	0.17691	PAXdb tissue integr.
ELN	P15502	N/A	0.00961794	PAXdb tissue integr.
FUS	P35637	N/A	1.00166	PAXdb cell line integr.
EWSR1	Q01844	N/A	1.3206	PAXdb cell line integr.
TAF15	Q92804	N/A	0.448505	PAXdb cell line integr.
HNRNPA0	Q13151	N/A	1.39535	PAXdb cell line integr.
HNRNPA1	P09651	N/A	4.30565	PAXdb cell line integr.
HNRNPA2B1	P22626	N/A	7.66445	PAXdb cell line integr.
HNRNPA3	P51991	N/A	2.06811	PAXdb cell line integr.
HNRNPH1	P31943	N/A	2.63621	PAXdb cell line integr.
HNRNPH2	P55795	N/A	1.68937	PAXdb cell line integr.
HNRNPH3	P31942	N/A	2.49668	PAXdb cell line integr.
HNRNPDL	O14979	N/A	1.97342	PAXdb cell line integr.
CSTF2	P33240	N/A	0.727575	PAXdb cell line integr.
CSTF2T	Q9H0L4	N/A	0.231229	PAXdb cell line integr.
DAZAP1	Q96EP5	N/A	0.435548	PAXdb cell line integr.
PSPC1	Q8WXF1	N/A	0.412625	PAXdb cell line integr.
TIA1	P31483	N/A	0.172924	PAXdb cell line integr.
TIAL1	Q01085	N/A	0.381229	PAXdb cell line integr.
TARDBP	Q13148	N/A	1.9186	PAXdb cell line integr.
RBM14	Q96PK6	N/A	0.682724	PAXdb cell line integr.
FMR1	Q06787	N/A	0.0598007	PAXdb cell line integr.
PTBP1	P26599	N/A	3.46346	PAXdb cell line integr.
U2AF65	P26368	N/A	1.49003	PAXdb cell line integr.
YTHDF1	Q9BYJ9	N/A	0.104651	PAXdb cell line integr.
YTHDF2	Q9Y5A9	N/A	0.153488	PAXdb cell line integr.
YTHDF3	Q7Z739	N/A		PAXdb cell line integr.
DDX3X	O00571	N/A	0.857143	PAXdb cell line integr.
DDX4	Q9NQI0	N/A	0.0682724	PAXdb cell line integr.
POLR2A	P24928	N/A	0.0842193	PAXdb cell line integr.
MED1	Q15648	N/A	0.033289	PAXdb cell line integr.
BRD4	O60885	N/A	0.0378239	PAXdb cell line integr.
MYC	P01106	N/A	0	PAXdb cell line integr.
SOX2	P48431	N/A	0.00548173	PAXdb cell line integr.
GATA2	P23769	N/A	0.031495	PAXdb cell line integr.
GATA3	P23771	N/A	0.0901993	PAXdb cell line integr.
RARA	P10276	N/A	0.00347841	PAXdb cell line integr.
NANOG	Q9H9S0	N/A		PAXdb cell line integr.
ESR1	P03372	N/A	0.0108638	PAXdb cell line integr.
NPM1	P06748	N/A	7.82392	PAXdb cell line integr.
RPL5	P46777	N/A	5.02326	PAXdb cell line integr.
RPL23A	P62750	N/A	6.80731	PAXdb cell line integr.
SURF6	O75683	N/A	0.0637874	PAXdb cell line integr.
GNL2	Q13823	N/A	0.0058804	PAXdb cell line integr.
CBX2	Q14781	N/A	0.0906977	PAXdb cell line integr.
CBX5	P45973	N/A	0.782392	PAXdb cell line integr.
CGAS	Q8N884	N/A	0.0492359	PAXdb cell line integr.
MORC3	Q14149	N/A	0.00921927	PAXdb cell line integr.
TP53BP1	Q12888	N/A	0.0702658	PAXdb cell line integr.
NPHS1	O60500	N/A	0.0138538	PAXdb cell line integr.
NCK1	P16333	N/A	0.0622924	PAXdb cell line integr.
WASL	O00401	N/A	0.0508306	PAXdb cell line integr.
LAT	O43561	N/A		PAXdb cell line integr.
GRB2	P62993	N/A	0.593023	PAXdb cell line integr.
SOS1	Q07889	N/A	0.0135548	PAXdb cell line integr.
GRAP2	O75791	N/A	0.000418605	PAXdb cell line integr.
LCP2	Q13094	N/A	0	PAXdb cell line integr.
SYNGAP1	Q96PV0	N/A	0.0180399	PAXdb cell line integr.
DLG4	P78352	N/A	0.00335382	PAXdb cell line integr.
HOMER3	Q9NSC5	N/A	5.98007e-05	PAXdb cell line integr.
SYN1	P17600	N/A	0.0662791	PAXdb cell line integr.
SYN2	Q92777	N/A		PAXdb cell line integr.
NUP98	P52948	N/A	0.0812292	PAXdb cell line integr.
NUP153	P49790	N/A	0.130565	PAXdb cell line integr.
AGO2	Q9UKV8	N/A	0.0464452	PAXdb cell line integr.
TNRC6B	Q9UPQ9	N/A	0.01799	PAXdb cell line integr.
SPOP	O43791	N/A	1.99336e-05	PAXdb cell line integr.
DAXX	Q9UER7	N/A	0.00707641	PAXdb cell line integr.
AR	P10275	N/A	0.00936877	PAXdb cell line integr.
UBQLN2	Q9UHD9	N/A	1.57973	PAXdb cell line integr.
SQSTM1	Q13501	N/A	0.692691	PAXdb cell line integr.
UBC	P0CG48	N/A	0.722591	PAXdb cell line integr.
CCNT1	O60563	N/A	0.058804	PAXdb cell line integr.
DYRK1A	Q13627	N/A	0.00169435	PAXdb cell line integr.
MAPT	P10636	N/A	0.0593023	PAXdb cell line integr.
PRNP	P04156	N/A	0.29402	PAXdb cell line integr.
APP	P05067	N/A	0.300498	PAXdb cell line integr.
VHL	P40337	N/A	0	PAXdb cell line integr.
LGALS3	P17931	N/A	10.9236	PAXdb cell line integr.
ELN	P15502	N/A	0.00380731	PAXdb cell line integr.
ELN	P15502	N/A	0.00380731	PAXdb cell line integr.
FUS	P35637	PMID:29650702	7.6	Estimated (local) conc.
EWSR1	Q01844	PMID:29650702	1.2	Estimated (local) conc.
TAF15	Q92804	PMID:29650702	0.2	Estimated (local) conc.
HNRNPA1	P09651	PMID:29650702	36	Estimated (local) conc.
HNRNPA3	P51991	PMID: 29961577	2.024	Estimated (local) conc.
HNRNPDL	O14979	PMID: 29961577	0.546	Estimated (local) conc.
TARDBP	Q13148	PMID:29650702	2.9	Estimated (local) conc.
YTHDF1	Q9BYJ9	PMID:31292544	5	Estimated (local) conc.
YTHDF2	Q9Y5A9	PMID:31292544	5	Estimated (local) conc.
YTHDF3	Q7Z739	PMID:31292544	5	Estimated (local) conc.
DDX3X	O00571	PMID:30531905	0.8	Estimated (local) conc.
POLR2A	P24928	PMID:30127355	100	Estimated (local) conc.
NPM1	P06748	PMID:32405004	4	Estimated (local) conc.
CBX5	P45973	PMID:28636604	100	Estimated (local) conc.
CGAS	Q8N884	PMID:29976794	0.012	Estimated (local) conc.
SYNGAP1	Q96PV0	PMID:28524815	100	Estimated (local) conc.
DLG4	P78352	PMID:28524815	100	Estimated (local) conc.
SYN1	P17600	PMID:29976799	100	Estimated (local) conc.
NUP98	P52948	PMID:25562883	50	Estimated (local) conc.
UBQLN2	Q9UHD9	PMID:29526694	1.25	Estimated (local) conc.
MAPT	P10636	PMID: 29472250	2	Estimated (local) conc.
PRNP	P04156	PMID:30401430	0.4	Estimated (local) conc.

## Sheet: Supplementary table 5
Table S5: Dosage sensitivity features of human proteins from the reviewed human proteome of UniProt.
group	Gene name	UniProt AC	MRDS Ni et al.	MRDIS Ni et al.	Ohnologs Makino et al.	Copy number conserved genes Rice et al.	Haploinssuficient genes Shihab et al. & Lek et al.
Whole human reviewed proteome(UniProt release 2020_04)	ALG2	Q9H553	no	no	no	yes	yes
Whole human reviewed proteome(UniProt release 2020_04)	GCNA	Q96QF7	no	no	no	no	yes
Whole human reviewed proteome(UniProt release 2020_04)	AKAP6	Q13023	no	no	no	no	yes
Whole human reviewed proteome(UniProt release 2020_04)	AEN	Q8WTP8	no	no	yes	yes	no
Whole human reviewed proteome(UniProt release 2020_04)	ADGRD2	Q7Z7M1	no	yes	no	no	no
Whole human reviewed proteome(UniProt release 2020_04)	ARFGAP3	Q9NP61	no	yes	no	no	no
Whole human reviewed proteome(UniProt release 2020_04)	ARL2	P36404	no	yes	no	no	no
Whole human reviewed proteome(UniProt release 2020_04)	ANKRD26P1	Q6NSI1	no	no	no	no	no
Whole human reviewed proteome(UniProt release 2020_04)	ANO2	Q9NQ90	no	no	yes	yes	no
Whole human reviewed proteome(UniProt release 2020_04)	PRMT1	Q99873	no	no	yes	no	yes
Whole human reviewed proteome(UniProt release 2020_04)	ASB8	Q9H765	no	no	no	yes	yes
Whole human reviewed proteome(UniProt release 2020_04)	ATP5PO	P48047	no	no	no	no	no
Whole human reviewed proteome(UniProt release 2020_04)	BUB1B	O60566	no	no	no	no	yes
Whole human reviewed proteome(UniProt release 2020_04)	C1QB	P02746	no	yes	no	no	no
Whole human reviewed proteome(UniProt release 2020_04)	C3orf20	Q8ND61	no	yes	no	no	no
Whole human reviewed proteome(UniProt release 2020_04)	CALHM5	Q8N5C1	no	yes	no	no	no
Whole human reviewed proteome(UniProt release 2020_04)	CCDC141	Q6ZP82	no	yes	no	no	no
Whole human reviewed proteome(UniProt release 2020_04)	C2CD4D	B7Z1M9	no	no	no	no	no
Whole human reviewed proteome(UniProt release 2020_04)	C1QTNF6	Q9BXI9	no	no	yes	no	no
Whole human reviewed proteome(UniProt release 2020_04)	CARMIL1	Q5VZK9	no	no	yes	yes	no
Whole human reviewed proteome(UniProt release 2020_04)	CALHM4	Q5JW98	no	no	no	yes	no
Whole human reviewed proteome(UniProt release 2020_04)	CCDC149	Q6ZUS6	no	no	no	yes	no
Whole human reviewed proteome(UniProt release 2020_04)	CTSC	P53634	no	yes	no	no	no
Whole human reviewed proteome(UniProt release 2020_04)	CFD	P00746	no	yes	no	no	no
Whole human reviewed proteome(UniProt release 2020_04)	CDC27	P30260	no	no	no	no	yes
Whole human reviewed proteome(UniProt release 2020_04)	CASZ1	Q86V15	no	no	no	yes	yes
Whole human reviewed proteome(UniProt release 2020_04)	CHMP1A	Q9HD42	no	no	no	no	yes
Whole human reviewed proteome(UniProt release 2020_04)	CENPF	P49454	no	no	yes	no	yes
Whole human reviewed proteome(UniProt release 2020_04)	CENPQ	Q7L2Z9	no	yes	no	no	no
Whole human reviewed proteome(UniProt release 2020_04)	CDX1	P47902	no	no	yes	no	no
Whole human reviewed proteome(UniProt release 2020_04)	LINC00588	Q9Y4M8	no	no	no	no	no
Whole human reviewed proteome(UniProt release 2020_04)	CD79B	P40259	no	no	no	yes	yes
Whole human reviewed proteome(UniProt release 2020_04)	CHMP4C	Q96CF2	no	no	yes	yes	yes
Whole human reviewed proteome(UniProt release 2020_04)	CDADC1	Q9BWV3	no	yes	no	no	no
Whole human reviewed proteome(UniProt release 2020_04)	CDRT15L2	A8MXV6	no	yes	no	no	no
Whole human reviewed proteome(UniProt release 2020_04)	CDK18	Q07002	no	no	yes	no	no
Whole human reviewed proteome(UniProt release 2020_04)	SPOUT1	Q5T280	no	yes	no	no	no
Whole human reviewed proteome(UniProt release 2020_04)	CFAP53	Q96M91	no	yes	no	no	no
Whole human reviewed proteome(UniProt release 2020_04)	CD38	P28907	no	yes	no	no	no
Whole human reviewed proteome(UniProt release 2020_04)	CFAP36	Q96G28	no	yes	no	no	no
Whole human reviewed proteome(UniProt release 2020_04)	CHST12	Q9NRB3	no	no	yes	yes	no
Whole human reviewed proteome(UniProt release 2020_04)	CD1B	P29016	no	yes	no	no	no
Whole human reviewed proteome(UniProt release 2020_04)	CLYBL	Q8N0X4	no	no	no	yes	no
Whole human reviewed proteome(UniProt release 2020_04)	CLDN23	Q96B33	no	yes	no	no	no
Whole human reviewed proteome(UniProt release 2020_04)	COBL	O75128	no	no	no	no	yes
Whole human reviewed proteome(UniProt release 2020_04)	CNOT7	Q9UIV1	no	no	yes	no	yes
Whole human reviewed proteome(UniProt release 2020_04)	C9	P02748	no	no	yes	yes	no
Whole human reviewed proteome(UniProt release 2020_04)	C12orf74	Q32Q52	no	yes	no	no	no
Whole human reviewed proteome(UniProt release 2020_04)	C11orf86	A6NJI1	no	no	no	no	no
Whole human reviewed proteome(UniProt release 2020_04)	CLDN4	O14493	no	no	yes	yes	yes
Whole human reviewed proteome(UniProt release 2020_04)	CLUAP1	Q96AJ1	no	yes	no	no	no
Whole human reviewed proteome(UniProt release 2020_04)	CLK1	P49759	no	no	yes	no	yes
Whole human reviewed proteome(UniProt release 2020_04)	CLIC1	O00299	no	yes	yes	no	no
Whole human reviewed proteome(UniProt release 2020_04)	CKAP2	Q8WWK9	no	no	yes	no	no
Whole human reviewed proteome(UniProt release 2020_04)	CRCT1	Q9UGL9	no	yes	no	no	no
Whole human reviewed proteome(UniProt release 2020_04)	LINC00305	Q7Z4B0	no	no	no	no	no
Whole human reviewed proteome(UniProt release 2020_04)	CSDC2	Q9Y534	no	no	yes	no	no
Whole human reviewed proteome(UniProt release 2020_04)	CASKIN1	Q8WXD9	no	no	yes	no	yes
Whole human reviewed proteome(UniProt release 2020_04)	TMEM63C	Q9P1W3	yes	no	yes	yes	yes
Whole human reviewed proteome(UniProt release 2020_04)	COPB2	P35606	no	no	no	no	yes
Whole human reviewed proteome(UniProt release 2020_04)	CRY1	Q16526	no	no	yes	yes	yes
Whole human reviewed proteome(UniProt release 2020_04)	CYP2A6	P11509	no	yes	no	no	no
Whole human reviewed proteome(UniProt release 2020_04)	CAPNS2	Q96L46	no	yes	no	no	no
Whole human reviewed proteome(UniProt release 2020_04)	DNAAF5	Q86Y56	no	yes	no	no	no
Whole human reviewed proteome(UniProt release 2020_04)	POMC	P01189	no	no	no	yes	no
Whole human reviewed proteome(UniProt release 2020_04)	CST2	P09228	no	no	yes	no	no
Whole human reviewed proteome(UniProt release 2020_04)	CYGB	Q8WWM9	no	no	yes	yes	yes
Whole human reviewed proteome(UniProt release 2020_04)	CTDP1	Q9Y5B0	no	no	no	no	yes
Whole human reviewed proteome(UniProt release 2020_04)	CYB5A	P00167	no	no	yes	no	yes
Whole human reviewed proteome(UniProt release 2020_04)	CT45A2	Q5DJT8	no	no	no	no	no
Whole human reviewed proteome(UniProt release 2020_04)	COX7B2	Q8TF08	no	yes	no	no	no
Whole human reviewed proteome(UniProt release 2020_04)	DMTN	Q08495	no	no	no	yes	yes
Whole human reviewed proteome(UniProt release 2020_04)	DDX41	Q9UJV9	no	no	no	no	yes
Whole human reviewed proteome(UniProt release 2020_04)	DBNDD2	Q9BQY9	no	yes	no	no	no
Whole human reviewed proteome(UniProt release 2020_04)	DDX17	Q92841	no	no	yes	no	no
Whole human reviewed proteome(UniProt release 2020_04)	DENND1B	Q6P3S1	no	no	no	no	yes
Whole human reviewed proteome(UniProt release 2020_04)	DDX25	Q9UHL0	no	yes	no	no	no
Whole human reviewed proteome(UniProt release 2020_04)	CSTF1	Q05048	no	no	no	yes	yes
Whole human reviewed proteome(UniProt release 2020_04)	DDIAS	Q8IXT1	no	no	no	yes	no
Whole human reviewed proteome(UniProt release 2020_04)	SLC25A5	P05141	no	no	yes	no	yes
Whole human reviewed proteome(UniProt release 2020_04)	AFF2	P51816	no	no	yes	no	yes
Whole human reviewed proteome(UniProt release 2020_04)	ALG13	Q9NP73	no	no	yes	no	yes
Whole human reviewed proteome(UniProt release 2020_04)	ADM	P35318	no	no	no	yes	no
Whole human reviewed proteome(UniProt release 2020_04)	AFAP1	Q8N556	no	no	yes	no	yes
Whole human reviewed proteome(UniProt release 2020_04)	ADAM28	Q9UKQ2	no	no	yes	yes	no
Whole human reviewed proteome(UniProt release 2020_04)	ADCY2	Q08462	no	no	yes	no	yes
Whole human reviewed proteome(UniProt release 2020_04)	ACSL1	P33121	no	no	yes	yes	yes
Whole human reviewed proteome(UniProt release 2020_04)	MAMDC4	Q6UXC1	no	yes	no	no	no
Whole human reviewed proteome(UniProt release 2020_04)	ALG6	Q9Y672	no	no	no	yes	no
Whole human reviewed proteome(UniProt release 2020_04)	ADAM11	O75078	no	no	yes	no	yes
Whole human reviewed proteome(UniProt release 2020_04)	ARF3	P61204	no	no	yes	no	yes
Whole human reviewed proteome(UniProt release 2020_04)	ALKBH3	Q96Q83	no	no	no	yes	no
Whole human reviewed proteome(UniProt release 2020_04)	ARHGEF17	Q96PE2	no	no	no	no	yes
Whole human reviewed proteome(UniProt release 2020_04)	AQP11	Q8NBQ7	no	no	yes	yes	no
Whole human reviewed proteome(UniProt release 2020_04)	AP1AR	Q63HQ0	no	no	no	no	yes
Whole human reviewed proteome(UniProt release 2020_04)	SNAP91	O60641	no	no	yes	no	yes
Whole human reviewed proteome(UniProt release 2020_04)	ANKRD54	Q6NXT1	no	no	no	yes	no
Whole human reviewed proteome(UniProt release 2020_04)	ANKRD1	Q15327	no	no	yes	yes	no
Whole human reviewed proteome(UniProt release 2020_04)	ADAMTS1	Q9UHI8	no	no	yes	no	yes
Whole human reviewed proteome(UniProt release 2020_04)	TBC1D32	Q96NH3	no	no	no	yes	no
Whole human reviewed proteome(UniProt release 2020_04)	BTBD6	Q96KE9	no	no	yes	no	no
Whole human reviewed proteome(UniProt release 2020_04)	CAMLG	P49069	no	yes	no	no	no
Whole human reviewed proteome(UniProt release 2020_04)	CALY	Q9NYX4	no	no	no	no	no
Whole human reviewed proteome(UniProt release 2020_04)	CALML6	Q8TD86	no	yes	no	no	no
Whole human reviewed proteome(UniProt release 2020_04)	CACHD1	Q5VU97	no	no	no	yes	yes
Whole human reviewed proteome(UniProt release 2020_04)	CPA4	Q9UI42	no	no	yes	no	no
Whole human reviewed proteome(UniProt release 2020_04)	TESC	Q96BS2	no	no	no	yes	yes
Whole human reviewed proteome(UniProt release 2020_04)	CHPF2	Q9P2E5	no	no	yes	yes	no
Whole human reviewed proteome(UniProt release 2020_04)	CTSS	P25774	no	no	no	yes	yes
Whole human reviewed proteome(UniProt release 2020_04)	CHRD	Q9H2X0	no	no	no	yes	yes
Whole human reviewed proteome(UniProt release 2020_04)	CEP112	Q8N8E3	no	yes	no	no	no
Whole human reviewed proteome(UniProt release 2020_04)	CHAMP1	Q96JM3	no	no	no	no	yes
Whole human reviewed proteome(UniProt release 2020_04)	CEP350	Q5VT06	no	no	no	yes	yes
Whole human reviewed proteome(UniProt release 2020_04)	C9orf116	Q5BN46	no	yes	no	no	no
Whole human reviewed proteome(UniProt release 2020_04)	CEACAM18	A8MTB9	no	yes	no	no	no
Whole human reviewed proteome(UniProt release 2020_04)	C6orf118	Q5T5N4	no	yes	no	no	no
Whole human reviewed proteome(UniProt release 2020_04)	CDKL4	Q5MAI5	no	no	no	yes	no
Whole human reviewed proteome(UniProt release 2020_04)	CD180	Q99467	no	no	no	yes	no
Whole human reviewed proteome(UniProt release 2020_04)	LINC00242	Q5T6M2	no	no	no	no	no
Whole human reviewed proteome(UniProt release 2020_04)	CD2AP	Q9Y5K6	no	no	yes	no	yes
Whole human reviewed proteome(UniProt release 2020_04)	CCNG1	P51959	no	no	yes	no	yes
Whole human reviewed proteome(UniProt release 2020_04)	CFAP161	Q6P656	no	no	no	no	no
Whole human reviewed proteome(UniProt release 2020_04)	CEP70	Q8NHQ1	no	no	no	yes	no
Whole human reviewed proteome(UniProt release 2020_04)	CERK	Q8TCT0	no	yes	no	no	no
Whole human reviewed proteome(UniProt release 2020_04)	CILP2	Q8IUL8	no	no	yes	no	yes
Whole human reviewed proteome(UniProt release 2020_04)	LINC00032	P0C843	no	no	no	no	no
Whole human reviewed proteome(UniProt release 2020_04)	COA6	Q5JTJ3	no	yes	no	no	no
Whole human reviewed proteome(UniProt release 2020_04)	CNOT3	O75175	no	no	no	yes	yes
Whole human reviewed proteome(UniProt release 2020_04)	CCNB1IP1	Q9NPC3	no	no	no	yes	yes
Whole human reviewed proteome(UniProt release 2020_04)	C12orf45	Q8N5I9	no	yes	no	no	no
Whole human reviewed proteome(UniProt release 2020_04)	C12orf65	Q9H3J6	no	yes	no	no	no
Whole human reviewed proteome(UniProt release 2020_04)	LINC01553	A4QN01	no	no	no	no	no
Whole human reviewed proteome(UniProt release 2020_04)	CYSLTR1	Q9Y271	no	yes	no	no	no
Whole human reviewed proteome(UniProt release 2020_04)	C10orf113	Q5VZT2	no	yes	no	no	no
Whole human reviewed proteome(UniProt release 2020_04)	CLEC4F	Q8N1N0	no	yes	no	no	no
Whole human reviewed proteome(UniProt release 2020_04)	CRIPAK	Q8N1N5	no	no	no	no	no
Whole human reviewed proteome(UniProt release 2020_04)	CRTC1	Q6UUV9	no	no	yes	no	yes
Whole human reviewed proteome(UniProt release 2020_04)	C11orf52	Q96A22	no	no	no	yes	no
Whole human reviewed proteome(UniProt release 2020_04)	CRHR1	P34998	no	no	yes	no	yes
Whole human reviewed proteome(UniProt release 2020_04)	COLCA1	Q6ZS62	no	no	no	no	no
Whole human reviewed proteome(UniProt release 2020_04)	CST5	P28325	no	no	yes	no	no
Whole human reviewed proteome(UniProt release 2020_04)	CYP4F3	Q08477	no	no	yes	no	no
Whole human reviewed proteome(UniProt release 2020_04)	CTAGE15	A4D2H0	no	no	no	no	no
Whole human reviewed proteome(UniProt release 2020_04)	COL16A1	Q07092	no	yes	no	no	no
Whole human reviewed proteome(UniProt release 2020_04)	CTXND2	A0A1B0GV90	no	no	no	no	no
Whole human reviewed proteome(UniProt release 2020_04)	DEFB103A	P81534	no	no	no	no	no
Whole human reviewed proteome(UniProt release 2020_04)	CTU2	Q2VPK5	no	yes	no	no	no
Whole human reviewed proteome(UniProt release 2020_04)	COX7A1	P24310	no	yes	no	no	no
Whole human reviewed proteome(UniProt release 2020_04)	LINC00313	P59037	no	no	no	no	no
Whole human reviewed proteome(UniProt release 2020_04)	CTLA4	P16410	no	no	no	yes	no
Whole human reviewed proteome(UniProt release 2020_04)	GJA3	Q9Y6H8	no	no	yes	no	no
Whole human reviewed proteome(UniProt release 2020_04)	CATSPERE	Q5SY80	no	yes	no	no	no
Whole human reviewed proteome(UniProt release 2020_04)	CXorf49;	A8MYA2	no	no	no	no	no
Whole human reviewed proteome(UniProt release 2020_04)	CSTF3	Q12996	no	no	no	no	yes
Whole human reviewed proteome(UniProt release 2020_04)	DEFB128	Q7Z7B8	no	no	no	no	no
Whole human reviewed proteome(UniProt release 2020_04)	PDF	Q9HBH1	no	yes	no	no	no
Whole human reviewed proteome(UniProt release 2020_04)	DDI1	Q8WTU0	no	yes	no	no	no
Whole human reviewed proteome(UniProt release 2020_04)	CLSTN3	Q9BQT9	no	no	yes	no	yes
Whole human reviewed proteome(UniProt release 2020_04)	DAZAP2	Q15038	no	no	no	yes	no
Whole human reviewed proteome(UniProt release 2020_04)	SFN	P31947	no	no	yes	no	yes
Whole human reviewed proteome(UniProt release 2020_04)	PPP2R5C	Q13362	yes	no	yes	yes	yes
Whole human reviewed proteome(UniProt release 2020_04)	HTR6	P50406	no	no	no	yes	no
Whole human reviewed proteome(UniProt release 2020_04)	ABHD8	Q96I13	no	no	no	no	yes
Whole human reviewed proteome(UniProt release 2020_04)	SH3BP5	O60239	no	no	no	yes	yes
Whole human reviewed proteome(UniProt release 2020_04)	ABL1	P00519	no	no	yes	no	yes
Whole human reviewed proteome(UniProt release 2020_04)	ABCD1	P33897	no	no	yes	no	yes
Whole human reviewed proteome(UniProt release 2020_04)	ALDOC	P09972	no	no	yes	yes	yes
Whole human reviewed proteome(UniProt release 2020_04)	NT5C2	P49902	no	no	yes	no	yes
Whole human reviewed proteome(UniProt release 2020_04)	AIG1	Q9NVV5	no	no	yes	yes	no
Whole human reviewed proteome(UniProt release 2020_04)	ABCA2	Q9BZC7	no	no	yes	no	yes
Whole human reviewed proteome(UniProt release 2020_04)	AKNA	Q7Z591	no	yes	no	no	no
Whole human reviewed proteome(UniProt release 2020_04)	AMOTL2	Q9Y2J4	no	no	yes	no	yes
Whole human reviewed proteome(UniProt release 2020_04)	AJAP1	Q9UKB5	no	no	no	no	yes
Whole human reviewed proteome(UniProt release 2020_04)	ADH4	P08319	no	yes	no	no	no
Whole human reviewed proteome(UniProt release 2020_04)	ACSM2B	Q68CK6	no	yes	no	no	no
Whole human reviewed proteome(UniProt release 2020_04)	AGXT2	Q9BYV1	no	yes	no	no	no
Whole human reviewed proteome(UniProt release 2020_04)	ALMS1	Q8TCU4	no	no	no	yes	no
Whole human reviewed proteome(UniProt release 2020_04)	AMPD2	Q01433	no	no	yes	no	yes
Whole human reviewed proteome(UniProt release 2020_04)	APPBP2	Q92624	no	no	no	yes	yes
Whole human reviewed proteome(UniProt release 2020_04)	ANKRD28	O15084	no	no	yes	no	yes
Whole human reviewed proteome(UniProt release 2020_04)	ANXA13	P27216	no	no	yes	yes	no
Whole human reviewed proteome(UniProt release 2020_04)	APBA1	Q02410	no	no	yes	yes	yes
Whole human reviewed proteome(UniProt release 2020_04)	ATXN7	O15265	yes	no	yes	yes	yes
Whole human reviewed proteome(UniProt release 2020_04)	ATXN7L1	Q9ULK2	no	no	yes	no	no
Whole human reviewed proteome(UniProt release 2020_04)	C1QL4	Q86Z23	no	no	yes	yes	yes
Whole human reviewed proteome(UniProt release 2020_04)	ATP7B	P35670	no	no	yes	no	no
Whole human reviewed proteome(UniProt release 2020_04)	CALM2	P0DP24	no	no	yes	no	yes
Whole human reviewed proteome(UniProt release 2020_04)	CALHM3	Q86XJ0	no	no	no	no	no
Whole human reviewed proteome(UniProt release 2020_04)	CALR	P27797	no	no	no	yes	yes
Whole human reviewed proteome(UniProt release 2020_04)	CARF	Q8N187	no	yes	no	no	no
Whole human reviewed proteome(UniProt release 2020_04)	CTSK	P43235	no	no	no	yes	no
Whole human reviewed proteome(UniProt release 2020_04)	CDC37	Q16543	no	no	no	yes	yes
Whole human reviewed proteome(UniProt release 2020_04)	CPM	P14384	no	yes	no	no	no
Whole human reviewed proteome(UniProt release 2020_04)	CELF6	Q96J87	no	no	yes	no	no
Whole human reviewed proteome(UniProt release 2020_04)	CFLAR	O15519	no	no	no	no	yes
Whole human reviewed proteome(UniProt release 2020_04)	CEP128	Q6ZU80	no	yes	no	no	no
Whole human reviewed proteome(UniProt release 2020_04)	CHEK1	O14757	no	no	no	yes	yes
Whole human reviewed proteome(UniProt release 2020_04)	C9orf152	Q5JTZ5	no	no	no	yes	no
Whole human reviewed proteome(UniProt release 2020_04)	CENPN	Q96H22	no	yes	no	no	no
Whole human reviewed proteome(UniProt release 2020_04)	C7orf26	Q96N11	no	no	no	no	yes
Whole human reviewed proteome(UniProt release 2020_04)	CDC23	Q9UJX2	no	no	no	yes	yes
Whole human reviewed proteome(UniProt release 2020_04)	CETN2	P41208	no	yes	no	no	yes
Whole human reviewed proteome(UniProt release 2020_04)	CHST2	Q9Y4C5	no	no	yes	no	yes
Whole human reviewed proteome(UniProt release 2020_04)	CFAP20	Q9Y6A4	no	no	no	yes	no
Whole human reviewed proteome(UniProt release 2020_04)	CNTNAP4	Q9C0A0	no	no	yes	no	no
Whole human reviewed proteome(UniProt release 2020_04)	CFAP91	Q7Z4T9	no	yes	no	no	no
Whole human reviewed proteome(UniProt release 2020_04)	CNTN6	Q9UQ52	no	no	yes	no	no
Whole human reviewed proteome(UniProt release 2020_04)	CNOT6L	Q96LI5	no	no	yes	no	yes
Whole human reviewed proteome(UniProt release 2020_04)	CNIH4	Q9P003	no	no	no	yes	no
Whole human reviewed proteome(UniProt release 2020_04)	CLDN17	P56750	no	no	yes	no	no
Whole human reviewed proteome(UniProt release 2020_04)	CLEC18C	Q8NCF0	no	no	yes	no	no
Whole human reviewed proteome(UniProt release 2020_04)	CMBL	Q96DG6	no	yes	no	no	no
Whole human reviewed proteome(UniProt release 2020_04)	LINC01465	Q8N7H1	no	no	no	no	no
Whole human reviewed proteome(UniProt release 2020_04)	C10orf95	Q9H7T3	no	no	no	no	no
Whole human reviewed proteome(UniProt release 2020_04)	CLRN3	Q8NCR9	no	yes	no	no	no
Whole human reviewed proteome(UniProt release 2020_04)	C11orf24	Q96F05	no	yes	no	no	no
Whole human reviewed proteome(UniProt release 2020_04)	C11orf72	Q8NBR9	no	no	no	no	no
Whole human reviewed proteome(UniProt release 2020_04)	CLMP	Q9H6B4	no	no	yes	yes	no
Whole human reviewed proteome(UniProt release 2020_04)	CLEC2B	Q92478	no	yes	no	no	no
Whole human reviewed proteome(UniProt release 2020_04)	C19orf25	Q9UFG5	no	yes	no	no	no
Whole human reviewed proteome(UniProt release 2020_04)	CLOCK	O15516	yes	no	yes	yes	yes
Whole human reviewed proteome(UniProt release 2020_04)	CRYAA	P02489	no	no	yes	no	yes
Whole human reviewed proteome(UniProt release 2020_04)	COX7C	P15954	no	no	no	no	yes
Whole human reviewed proteome(UniProt release 2020_04)	CSPG5	O95196	no	no	no	yes	yes
Whole human reviewed proteome(UniProt release 2020_04)	LINC02876	F2Z3M2	no	no	no	no	no
Whole human reviewed proteome(UniProt release 2020_04)	CSAG2	Q9Y5P2	no	no	no	no	no
Whole human reviewed proteome(UniProt release 2020_04)	CSAD	Q9Y600	no	yes	no	no	no
Whole human reviewed proteome(UniProt release 2020_04)	C12orf77	C9JDV5	no	no	no	no	no
Whole human reviewed proteome(UniProt release 2020_04)	COX19	Q49B96	no	yes	no	no	no
Whole human reviewed proteome(UniProt release 2020_04)	CPLX2	Q6PUV4	no	no	no	no	yes
Whole human reviewed proteome(UniProt release 2020_04)	SS18L1	O75177	no	no	no	no	yes
Whole human reviewed proteome(UniProt release 2020_04)	CYP2E1	P05181	no	no	yes	no	yes
Whole human reviewed proteome(UniProt release 2020_04)	COG3	Q96JB2	no	no	no	no	yes
Whole human reviewed proteome(UniProt release 2020_04)	CRYGC	P07315	no	no	yes	no	no
Whole human reviewed proteome(UniProt release 2020_04)	CTAG1A	P78358	no	no	no	no	no
Whole human reviewed proteome(UniProt release 2020_04)	COLCA2	A8K830	no	no	no	no	no
Whole human reviewed proteome(UniProt release 2020_04)	CTNNAL1	Q9UBT7	no	no	no	yes	yes
Whole human reviewed proteome(UniProt release 2020_04)	CT45A1	Q5HYN5	no	no	no	no	no
Whole human reviewed proteome(UniProt release 2020_04)	GJB6	O95452	no	no	yes	no	no
Whole human reviewed proteome(UniProt release 2020_04)	CTTNBP2NL	Q9P2B4	no	no	yes	yes	yes
Whole human reviewed proteome(UniProt release 2020_04)	CXCR2	P25025	no	no	yes	no	no
Whole human reviewed proteome(UniProt release 2020_04)	NKAPP1	Q8N9T2	no	no	no	no	no
Whole human reviewed proteome(UniProt release 2020_04)	ARHGEF7	Q14155	no	no	yes	no	yes
Whole human reviewed proteome(UniProt release 2020_04)	ANO8	Q9HCE9	no	no	no	no	yes
Whole human reviewed proteome(UniProt release 2020_04)	ANKRD36C	Q5JPF3	no	no	no	no	no
Whole human reviewed proteome(UniProt release 2020_04)	ANKRD52	Q8NB46	yes	no	yes	yes	yes
Whole human reviewed proteome(UniProt release 2020_04)	ANO5	Q75V66	no	no	yes	yes	no
Whole human reviewed proteome(UniProt release 2020_04)	ANGEL1	Q9UNK9	no	no	yes	yes	no
Whole human reviewed proteome(UniProt release 2020_04)	ANLN	Q9NQW6	no	no	no	no	yes
Whole human reviewed proteome(UniProt release 2020_04)	NPR3	P17342	no	no	no	yes	yes
Whole human reviewed proteome(UniProt release 2020_04)	ATP10B	O94823	no	no	yes	yes	no
Whole human reviewed proteome(UniProt release 2020_04)	AP4M1	O00189	no	no	no	no	yes
Whole human reviewed proteome(UniProt release 2020_04)	APOB	P04114	no	yes	no	no	no
Whole human reviewed proteome(UniProt release 2020_04)	ASPHD1	Q5U4P2	no	no	yes	yes	no
Whole human reviewed proteome(UniProt release 2020_04)	TFAP2D	Q7Z6R9	yes	no	yes	yes	yes
Whole human reviewed proteome(UniProt release 2020_04)	ANXA2	P07355	no	no	yes	no	yes
Whole human reviewed proteome(UniProt release 2020_04)	ANAPC2	Q9UJX6	no	no	no	no	yes
Whole human reviewed proteome(UniProt release 2020_04)	ASB10	Q8WXI3	no	no	yes	yes	no
Whole human reviewed proteome(UniProt release 2020_04)	ACTR3B	Q9P1U1	no	no	yes	no	yes
Whole human reviewed proteome(UniProt release 2020_04)	ACTR3	P61158	no	no	yes	no	yes
Whole human reviewed proteome(UniProt release 2020_04)	ASDURF	L0R819	no	no	no	no	no
Whole human reviewed proteome(UniProt release 2020_04)	ARRDC5	A6NEK1	no	yes	no	no	no
Whole human reviewed proteome(UniProt release 2020_04)	ARPC3	O15145	no	no	no	no	yes
Whole human reviewed proteome(UniProt release 2020_04)	ATPAF1	Q5TC12	no	no	no	no	yes
Whole human reviewed proteome(UniProt release 2020_04)	BMPR2	Q13873	no	no	no	yes	yes
Whole human reviewed proteome(UniProt release 2020_04)	CBLN3	Q6UW01	no	no	yes	yes	no
Whole human reviewed proteome(UniProt release 2020_04)	CCDC121	Q6ZUS5	no	yes	no	no	no
Whole human reviewed proteome(UniProt release 2020_04)	CCL3	P10147	no	no	no	no	no
Whole human reviewed proteome(UniProt release 2020_04)	C3orf36	Q3SXR2	no	no	no	no	no
Whole human reviewed proteome(UniProt release 2020_04)	CALCA	P06881	no	yes	no	no	no
Whole human reviewed proteome(UniProt release 2020_04)	CASR	P41180	no	no	yes	yes	yes
Whole human reviewed proteome(UniProt release 2020_04)	CFDP1	Q9UEE9	no	yes	no	no	no
Whole human reviewed proteome(UniProt release 2020_04)	CHCHD10	Q8WYQ3	no	yes	no	no	no
Whole human reviewed proteome(UniProt release 2020_04)	LINC01006	Q8NI28	no	no	no	no	no
Whole human reviewed proteome(UniProt release 2020_04)	CDAN1	Q8IWY9	no	no	no	yes	yes
Whole human reviewed proteome(UniProt release 2020_04)	CDK5R1	Q15078	no	no	yes	no	yes
Whole human reviewed proteome(UniProt release 2020_04)	CENPV	Q7Z7K6	no	yes	no	no	no
Whole human reviewed proteome(UniProt release 2020_04)	C5orf46	Q6UWT4	no	yes	no	no	no
Whole human reviewed proteome(UniProt release 2020_04)	CCR2	P41597	no	no	yes	no	no
Whole human reviewed proteome(UniProt release 2020_04)	CHST8	Q9H2A9	no	no	yes	yes	no
Whole human reviewed proteome(UniProt release 2020_04)	CFAP52	Q8N1V2	no	no	no	yes	no
Whole human reviewed proteome(UniProt release 2020_04)	CD209	Q9NNX6	no	yes	no	no	no
Whole human reviewed proteome(UniProt release 2020_04)	C4orf51	C9J302	no	yes	no	no	no
Whole human reviewed proteome(UniProt release 2020_04)	CDK11A	Q9UQ88	no	yes	no	no	no
Whole human reviewed proteome(UniProt release 2020_04)	CCNJL	Q8IV13	no	no	yes	no	no
Whole human reviewed proteome(UniProt release 2020_04)	CLEC6A	Q6EIG7	no	no	yes	no	no
Whole human reviewed proteome(UniProt release 2020_04)	CLEC7A	Q9BXN2	no	no	no	yes	no
Whole human reviewed proteome(UniProt release 2020_04)	CNTF	P26441	no	yes	no	no	no
Whole human reviewed proteome(UniProt release 2020_04)	C15orf65	H3BRN8	no	yes	no	no	no
Whole human reviewed proteome(UniProt release 2020_04)	CNTN1	Q12860	yes	no	yes	yes	yes
Whole human reviewed proteome(UniProt release 2020_04)	CNOT4	O95628	no	no	no	yes	yes
Whole human reviewed proteome(UniProt release 2020_04)	COL5A1	P20908	no	no	no	no	yes
Whole human reviewed proteome(UniProt release 2020_04)	CLDN9	O95484	no	no	yes	no	no
Whole human reviewed proteome(UniProt release 2020_04)	CMTM5	Q96DZ9	no	yes	no	no	no
Whole human reviewed proteome(UniProt release 2020_04)	GPS1	Q13098	no	no	no	no	yes
Whole human reviewed proteome(UniProt release 2020_04)	CSMD1	Q96PZ7	no	no	yes	yes	no
Whole human reviewed proteome(UniProt release 2020_04)	CPNE7	Q9UBL6	no	no	yes	no	no
Whole human reviewed proteome(UniProt release 2020_04)	CREG2	Q8IUH2	no	no	no	yes	no
Whole human reviewed proteome(UniProt release 2020_04)	CRIM1	Q9NZV1	no	no	no	no	yes
Whole human reviewed proteome(UniProt release 2020_04)	C16orf92	Q96LL3	no	yes	no	no	no
Whole human reviewed proteome(UniProt release 2020_04)	CD300A	Q9UGN4	no	yes	no	no	no
Whole human reviewed proteome(UniProt release 2020_04)	CFL1	P23528	no	no	yes	no	yes
Whole human reviewed proteome(UniProt release 2020_04)	CLEC12A	Q5QGZ9	no	yes	no	no	no
Whole human reviewed proteome(UniProt release 2020_04)	COL26A1	Q96A83	no	no	no	no	no
Whole human reviewed proteome(UniProt release 2020_04)	COMMD9	Q9P000	no	no	no	no	no
Whole human reviewed proteome(UniProt release 2020_04)	CTF1	Q16619	no	yes	no	no	no
Whole human reviewed proteome(UniProt release 2020_04)	CTDSPL	O15194	no	no	yes	no	no
Whole human reviewed proteome(UniProt release 2020_04)	DPY19L4	Q7Z388	no	no	yes	yes	no
Whole human reviewed proteome(UniProt release 2020_04)	CATSPER1	Q8NEC5	no	yes	no	no	no
Whole human reviewed proteome(UniProt release 2020_04)	CATSPER3	Q86XQ3	no	no	no	yes	no
Whole human reviewed proteome(UniProt release 2020_04)	ADAM22	Q9P0K1	yes	no	yes	yes	yes
Whole human reviewed proteome(UniProt release 2020_04)	AP5S1	Q9NUS5	no	no	no	yes	no
Whole human reviewed proteome(UniProt release 2020_04)	ANKRD45	Q5TZF3	no	yes	no	no	no
Whole human reviewed proteome(UniProt release 2020_04)	ATG4B	Q9Y4P1	no	no	no	no	yes
Whole human reviewed proteome(UniProt release 2020_04)	AOX1	Q06278	no	no	no	no	yes
Whole human reviewed proteome(UniProt release 2020_04)	ATXN3L	Q9H3M9	no	yes	no	no	no
Whole human reviewed proteome(UniProt release 2020_04)	ATP1A3	P13637	no	no	yes	yes	yes
Whole human reviewed proteome(UniProt release 2020_04)	ARSA	P15289	no	no	yes	yes	no
Whole human reviewed proteome(UniProt release 2020_04)	BMP2K	Q9NSY1	no	yes	no	no	no
Whole human reviewed proteome(UniProt release 2020_04)	BTD	P43251	no	yes	no	no	no
Whole human reviewed proteome(UniProt release 2020_04)	CD163	Q86VB7	no	yes	no	no	no
Whole human reviewed proteome(UniProt release 2020_04)	BRDT	Q58F21	no	no	yes	no	no
Whole human reviewed proteome(UniProt release 2020_04)	BCL2L1	Q07817	no	no	yes	no	yes
Whole human reviewed proteome(UniProt release 2020_04)	CCDC185	Q8N715	no	yes	no	no	no
Whole human reviewed proteome(UniProt release 2020_04)	CCER1	Q8TC90	no	yes	no	no	no
Whole human reviewed proteome(UniProt release 2020_04)	BAG5	Q9UL15	no	no	no	no	yes
Whole human reviewed proteome(UniProt release 2020_04)	BAP18	Q8IXM2	no	yes	no	no	no
Whole human reviewed proteome(UniProt release 2020_04)	BHLHA9	Q7RTU4	no	no	no	no	no
Whole human reviewed proteome(UniProt release 2020_04)	CCDC74B	Q96LY2	no	yes	no	no	no
Whole human reviewed proteome(UniProt release 2020_04)	CCDC3	Q9BQI4	no	yes	no	no	no
Whole human reviewed proteome(UniProt release 2020_04)	CASP8AP2	Q9UKL3	no	no	no	no	no
Whole human reviewed proteome(UniProt release 2020_04)	CACNG1	Q06432	no	no	no	yes	no
Whole human reviewed proteome(UniProt release 2020_04)	CCDC62	Q6P9F0	no	no	no	yes	no
Whole human reviewed proteome(UniProt release 2020_04)	CBX3	Q13185	no	no	yes	no	yes
Whole human reviewed proteome(UniProt release 2020_04)	C2CD4A	Q8NCU7	no	yes	no	no	no
Whole human reviewed proteome(UniProt release 2020_04)	C2CD4B	A6NLJ0	no	yes	no	no	no
Whole human reviewed proteome(UniProt release 2020_04)	CACNA2D4	Q7Z3S7	no	no	yes	no	no
Whole human reviewed proteome(UniProt release 2020_04)	CA3	P07451	no	no	yes	yes	no
Whole human reviewed proteome(UniProt release 2020_04)	CASD1	Q96PB1	no	no	no	yes	yes
Whole human reviewed proteome(UniProt release 2020_04)	CELSR1	Q9NYQ6	no	no	yes	no	yes
Whole human reviewed proteome(UniProt release 2020_04)	C7orf31	Q8N865	no	yes	no	no	no
Whole human reviewed proteome(UniProt release 2020_04)	CENPVL2	P0DPI3	no	no	no	no	no
Whole human reviewed proteome(UniProt release 2020_04)	CD72	P21854	no	no	no	yes	yes
Whole human reviewed proteome(UniProt release 2020_04)	CGGBP1	Q9UFW8	no	no	no	no	yes
Whole human reviewed proteome(UniProt release 2020_04)	CDHR3	Q6ZTQ4	no	yes	no	no	no
Whole human reviewed proteome(UniProt release 2020_04)	C9orf139	Q6ZV77	no	no	no	no	no
Whole human reviewed proteome(UniProt release 2020_04)	CDKL5	O76039	no	no	no	yes	yes
Whole human reviewed proteome(UniProt release 2020_04)	CDON	Q4KMG0	no	no	yes	yes	yes
Whole human reviewed proteome(UniProt release 2020_04)	CLEC9A	Q6UXN8	no	yes	no	no	no
Whole human reviewed proteome(UniProt release 2020_04)	CCR10	P46092	no	no	yes	yes	no
Whole human reviewed proteome(UniProt release 2020_04)	CCNL1	Q9UK58	no	no	yes	no	yes
Whole human reviewed proteome(UniProt release 2020_04)	CFAP77	Q6ZQR2	no	yes	no	no	no
Whole human reviewed proteome(UniProt release 2020_04)	C15orf32	Q32M92	no	no	no	no	no
Whole human reviewed proteome(UniProt release 2020_04)	CMSS1	Q9BQ75	no	no	no	yes	no
Whole human reviewed proteome(UniProt release 2020_04)	CTNNBIP1	Q9NSA3	no	no	no	no	yes
Whole human reviewed proteome(UniProt release 2020_04)	CNOT10	Q9H9A5	no	no	no	yes	yes
Whole human reviewed proteome(UniProt release 2020_04)	CLTA	P09496	no	no	yes	no	yes
Whole human reviewed proteome(UniProt release 2020_04)	CLDN19	Q8N6F1	no	no	yes	yes	no
Whole human reviewed proteome(UniProt release 2020_04)	CLIP2	Q9UDT6	no	no	yes	no	yes
Whole human reviewed proteome(UniProt release 2020_04)	C19orf67	A6NJJ6	no	no	no	no	no
Whole human reviewed proteome(UniProt release 2020_04)	CPXM2	Q8N436	no	no	yes	yes	no
Whole human reviewed proteome(UniProt release 2020_04)	CSH2	P0DML3	no	yes	no	no	no
Whole human reviewed proteome(UniProt release 2020_04)	C18orf15	Q96N68	no	no	no	no	no
Whole human reviewed proteome(UniProt release 2020_04)	CRADD	P78560	no	no	no	no	yes
Whole human reviewed proteome(UniProt release 2020_04)	COP1	Q8NHY2	no	no	no	no	yes
Whole human reviewed proteome(UniProt release 2020_04)	LINC00304	Q8N9R0	no	no	no	no	no
Whole human reviewed proteome(UniProt release 2020_04)	CREBRF	Q8IUR6	no	no	no	yes	yes
Whole human reviewed proteome(UniProt release 2020_04)	C16orf86	Q6ZW13	no	no	no	no	no
Whole human reviewed proteome(UniProt release 2020_04)	SLC31A1	O15431	no	no	no	no	no
Whole human reviewed proteome(UniProt release 2020_04)	CPNE3	O75131	no	no	yes	yes	no
Whole human reviewed proteome(UniProt release 2020_04)	CYP24A1	Q07973	no	no	yes	yes	no
Whole human reviewed proteome(UniProt release 2020_04)	COPE	O14579	no	no	no	no	yes
Whole human reviewed proteome(UniProt release 2020_04)	C16orf47	Q6ZP98	no	no	no	no	no
Whole human reviewed proteome(UniProt release 2020_04)	ABCA1	O95477	no	no	yes	no	yes
Whole human reviewed proteome(UniProt release 2020_04)	DBI	P07108	no	no	yes	yes	no
Whole human reviewed proteome(UniProt release 2020_04)	CHRNA3	P32297	no	no	yes	yes	no
Whole human reviewed proteome(UniProt release 2020_04)	YWHAG	P61981	yes	no	yes	yes	yes
Whole human reviewed proteome(UniProt release 2020_04)	AGAP4	Q96P64	no	no	yes	no	no
Whole human reviewed proteome(UniProt release 2020_04)	CHRNG	P07510	no	no	yes	yes	no
Whole human reviewed proteome(UniProt release 2020_04)	ALS2CL	Q60I27	no	no	yes	yes	no
Whole human reviewed proteome(UniProt release 2020_04)	AMER2	Q8N7J2	no	no	no	no	no
Whole human reviewed proteome(UniProt release 2020_04)	AHI1	Q8N157	no	no	no	yes	no
Whole human reviewed proteome(UniProt release 2020_04)	CHRNB1	P11230	no	no	yes	yes	no
Whole human reviewed proteome(UniProt release 2020_04)	ADCY9	O60503	no	no	no	yes	yes
Whole human reviewed proteome(UniProt release 2020_04)	ATP5MG	O75964	no	yes	no	no	no
Whole human reviewed proteome(UniProt release 2020_04)	BIRC6	Q9NR09	no	no	no	no	yes
Whole human reviewed proteome(UniProt release 2020_04)	CCDC102B	Q68D86	no	no	yes	no	no
Whole human reviewed proteome(UniProt release 2020_04)	GLB1	P16278	no	no	yes	no	no
Whole human reviewed proteome(UniProt release 2020_04)	ADAMTS20	P59510	no	no	yes	no	no
Whole human reviewed proteome(UniProt release 2020_04)	BCAT1	P54687	no	no	yes	no	no
Whole human reviewed proteome(UniProt release 2020_04)	CAPN1	P07384	no	no	yes	yes	yes
Whole human reviewed proteome(UniProt release 2020_04)	CCDC60	Q8IWA6	no	no	no	yes	no
Whole human reviewed proteome(UniProt release 2020_04)	CA1	P00915	no	no	yes	no	no
Whole human reviewed proteome(UniProt release 2020_04)	CCDC124	Q96CT7	no	yes	no	no	no
Whole human reviewed proteome(UniProt release 2020_04)	PPP3R1	P63098	no	no	no	no	yes
Whole human reviewed proteome(UniProt release 2020_04)	CCDC130	P13994	no	no	no	no	yes
Whole human reviewed proteome(UniProt release 2020_04)	CASP14	P31944	no	no	no	yes	no
Whole human reviewed proteome(UniProt release 2020_04)	CBX8	Q9HC52	no	no	no	yes	yes
Whole human reviewed proteome(UniProt release 2020_04)	CBY1	Q9Y3M2	no	no	no	yes	yes
Whole human reviewed proteome(UniProt release 2020_04)	CA7	P43166	no	no	yes	yes	yes
Whole human reviewed proteome(UniProt release 2020_04)	CCL7	P80098	no	yes	no	no	no
Whole human reviewed proteome(UniProt release 2020_04)	CFH	P08603	no	no	no	no	yes
Whole human reviewed proteome(UniProt release 2020_04)	CELA3A	P09093	no	yes	no	no	no
Whole human reviewed proteome(UniProt release 2020_04)	CHI3L1	P36222	no	no	no	yes	no
Whole human reviewed proteome(UniProt release 2020_04)	CDCP1	Q9H5V8	no	no	no	yes	yes
Whole human reviewed proteome(UniProt release 2020_04)	CEBPZOS	A8MTT3	no	yes	no	no	no
Whole human reviewed proteome(UniProt release 2020_04)	CEBPZ	Q03701	no	no	no	yes	yes
Whole human reviewed proteome(UniProt release 2020_04)	C7orf33	Q8WU49	no	yes	no	no	no
Whole human reviewed proteome(UniProt release 2020_04)	CHMP4A	Q9BY43	no	yes	no	no	no
Whole human reviewed proteome(UniProt release 2020_04)	CARHSP1	Q9Y2V2	no	no	yes	no	no
Whole human reviewed proteome(UniProt release 2020_04)	CCZ1	P86791	no	no	no	no	yes
Whole human reviewed proteome(UniProt release 2020_04)	CHP1	Q99653	no	no	no	yes	yes
Whole human reviewed proteome(UniProt release 2020_04)	CDK2AP2	O75956	no	no	yes	no	no
Whole human reviewed proteome(UniProt release 2020_04)	CDR1	P51861	no	no	no	no	no
Whole human reviewed proteome(UniProt release 2020_04)	CILP	O75339	no	no	yes	no	no
Whole human reviewed proteome(UniProt release 2020_04)	CFAP57	Q96MR6	no	yes	no	no	no
Whole human reviewed proteome(UniProt release 2020_04)	CCN1	O00622	no	no	yes	yes	no
Whole human reviewed proteome(UniProt release 2020_04)	CLEC5A	Q9NY25	no	no	no	yes	no
Whole human reviewed proteome(UniProt release 2020_04)	CEP63	Q96MT8	no	no	yes	yes	no
Whole human reviewed proteome(UniProt release 2020_04)	CD2	P06729	no	no	no	yes	yes
Whole human reviewed proteome(UniProt release 2020_04)	CLCN7	P51798	no	no	no	no	yes
Whole human reviewed proteome(UniProt release 2020_04)	NCAPD2	Q15021	no	no	no	yes	yes
Whole human reviewed proteome(UniProt release 2020_04)	C7	P10643	no	no	yes	yes	no
Whole human reviewed proteome(UniProt release 2020_04)	CNNM3	Q8NE01	no	no	yes	no	no
Whole human reviewed proteome(UniProt release 2020_04)	COL6A3	P12111	no	no	yes	no	no
Whole human reviewed proteome(UniProt release 2020_04)	CNIH3	Q8TBE1	no	no	yes	yes	yes
Whole human reviewed proteome(UniProt release 2020_04)	CLEC18A	A5D8T8	no	no	yes	no	no
Whole human reviewed proteome(UniProt release 2020_04)	CLEC3A	O75596	no	no	no	yes	no
Whole human reviewed proteome(UniProt release 2020_04)	CLUHP3	Q96NS8	no	no	no	no	no
Whole human reviewed proteome(UniProt release 2020_04)	C10orf55	Q5SWW7	no	yes	no	no	no
Whole human reviewed proteome(UniProt release 2020_04)	CLTC	Q00610	no	no	yes	no	yes
Whole human reviewed proteome(UniProt release 2020_04)	CLIP3	Q96DZ5	no	no	yes	no	yes
Whole human reviewed proteome(UniProt release 2020_04)	CSF1R	P07333	yes	no	yes	yes	yes
Whole human reviewed proteome(UniProt release 2020_04)	LINC00526	Q96FQ7	no	no	no	no	no
Whole human reviewed proteome(UniProt release 2020_04)	COPB1	P53618	no	no	no	no	yes
Whole human reviewed proteome(UniProt release 2020_04)	CRYBA1	P05813	no	no	yes	no	no
Whole human reviewed proteome(UniProt release 2020_04)	CYP1B1	Q16678	no	yes	no	no	no
Whole human reviewed proteome(UniProt release 2020_04)	COG1	Q8WTW3	no	no	no	yes	no
Whole human reviewed proteome(UniProt release 2020_04)	GJC2	Q5T442	no	no	yes	no	yes
Whole human reviewed proteome(UniProt release 2020_04)	CTAGE6	Q86UF2	no	yes	no	no	no
Whole human reviewed proteome(UniProt release 2020_04)	CYC1	P08574	no	no	no	no	yes
Whole human reviewed proteome(UniProt release 2020_04)	CTNNB1	P35222	yes	no	yes	yes	yes
Whole human reviewed proteome(UniProt release 2020_04)	ACBD6	Q9BR61	no	no	no	no	no
Whole human reviewed proteome(UniProt release 2020_04)	ACCSL	Q4AC99	no	yes	no	no	no
Whole human reviewed proteome(UniProt release 2020_04)	ARL15	Q9NXU5	no	no	no	yes	no
Whole human reviewed proteome(UniProt release 2020_04)	ARFGAP1	Q8N6T3	no	no	no	no	yes
Whole human reviewed proteome(UniProt release 2020_04)	ADRA1B	P35368	no	no	yes	no	yes
Whole human reviewed proteome(UniProt release 2020_04)	ARF4	P18085	no	no	yes	no	yes
Whole human reviewed proteome(UniProt release 2020_04)	ADRA2B	P18089	no	no	no	no	no
Whole human reviewed proteome(UniProt release 2020_04)	APOH	P02749	no	yes	no	no	no
Whole human reviewed proteome(UniProt release 2020_04)	ANO9	A1A5B4	no	yes	no	no	no
Whole human reviewed proteome(UniProt release 2020_04)	ARRDC1	Q8N5I2	no	no	no	no	yes
Whole human reviewed proteome(UniProt release 2020_04)	ATG4A	Q8WYN0	no	no	no	yes	yes
Whole human reviewed proteome(UniProt release 2020_04)	ATP5MF	P56134	no	no	no	no	no
Whole human reviewed proteome(UniProt release 2020_04)	ASF1A	Q9Y294	no	no	no	yes	yes
Whole human reviewed proteome(UniProt release 2020_04)	ADAMTS17	Q8TE56	no	no	yes	no	yes
Whole human reviewed proteome(UniProt release 2020_04)	BACE1	P56817	yes	no	yes	yes	yes
Whole human reviewed proteome(UniProt release 2020_04)	BPIFA2	Q96DR5	no	yes	no	no	no
Whole human reviewed proteome(UniProt release 2020_04)	B3GNT3	Q9Y2A9	no	no	yes	no	no
Whole human reviewed proteome(UniProt release 2020_04)	BCL9L	Q86UU0	no	no	no	yes	yes
Whole human reviewed proteome(UniProt release 2020_04)	CABIN1	Q9Y6J0	no	no	no	no	yes
Whole human reviewed proteome(UniProt release 2020_04)	CADPS	Q9ULU8	no	no	yes	no	yes
Whole human reviewed proteome(UniProt release 2020_04)	CCDC70	Q6NSX1	no	no	no	yes	no
Whole human reviewed proteome(UniProt release 2020_04)	CCDC66	A2RUB6	no	yes	no	no	no
Whole human reviewed proteome(UniProt release 2020_04)	C1orf74	Q96LT6	no	no	no	yes	no
Whole human reviewed proteome(UniProt release 2020_04)	C1QTNF1	Q9BXJ1	no	no	yes	yes	yes
Whole human reviewed proteome(UniProt release 2020_04)	C3orf18	Q9UK00	no	no	no	yes	no
Whole human reviewed proteome(UniProt release 2020_04)	CCDC148	Q8NFR7	no	yes	no	no	no
Whole human reviewed proteome(UniProt release 2020_04)	C1S	P09871	no	no	yes	no	no
Whole human reviewed proteome(UniProt release 2020_04)	CCDC142	Q17RM4	no	no	no	yes	no
Whole human reviewed proteome(UniProt release 2020_04)	CASP3	P42574	no	no	yes	no	yes
Whole human reviewed proteome(UniProt release 2020_04)	C2CD3	Q4AC94	no	no	no	yes	no
Whole human reviewed proteome(UniProt release 2020_04)	CA2	P00918	no	no	yes	yes	yes
Whole human reviewed proteome(UniProt release 2020_04)	CASS4	Q9NQ75	no	no	yes	yes	no
Whole human reviewed proteome(UniProt release 2020_04)	CATIP	Q7Z7H3	no	yes	no	no	no
Whole human reviewed proteome(UniProt release 2020_04)	CC2D2B	Q6DHV5	no	yes	no	no	no
Whole human reviewed proteome(UniProt release 2020_04)	CHI3L2	Q15782	no	yes	no	no	no
Whole human reviewed proteome(UniProt release 2020_04)	CHRAC1	Q9NRG0	no	no	no	no	yes
Whole human reviewed proteome(UniProt release 2020_04)	CHORDC1	Q9UHD1	no	no	yes	no	yes
Whole human reviewed proteome(UniProt release 2020_04)	CTSB	P07858	no	no	no	yes	no
Whole human reviewed proteome(UniProt release 2020_04)	CHIC2	Q9UKJ5	no	no	yes	yes	yes
Whole human reviewed proteome(UniProt release 2020_04)	CHKA	P35790	no	no	yes	no	yes
Whole human reviewed proteome(UniProt release 2020_04)	C9orf153	Q5TBE3	no	yes	no	no	no
Whole human reviewed proteome(UniProt release 2020_04)	NDUFAF1	Q9Y375	no	yes	no	no	no
Whole human reviewed proteome(UniProt release 2020_04)	C6orf99	Q4VX62	no	no	no	no	no
Whole human reviewed proteome(UniProt release 2020_04)	CDKN3	Q16667	no	no	no	no	yes
Whole human reviewed proteome(UniProt release 2020_04)	CD68	P34810	no	yes	no	no	no
Whole human reviewed proteome(UniProt release 2020_04)	CCNQ	Q8N1B3	no	no	no	no	no
Whole human reviewed proteome(UniProt release 2020_04)	CD226	Q15762	no	no	no	no	no
Whole human reviewed proteome(UniProt release 2020_04)	CCR3	P51677	no	no	yes	no	no
Whole human reviewed proteome(UniProt release 2020_04)	CDC123	O75794	no	no	no	no	yes
Whole human reviewed proteome(UniProt release 2020_04)	CLCN1	P35523	no	no	yes	no	no
Whole human reviewed proteome(UniProt release 2020_04)	CCNL2	Q96S94	no	no	yes	yes	yes
Whole human reviewed proteome(UniProt release 2020_04)	CLEC20A	Q6ZU45	no	no	no	no	no
Whole human reviewed proteome(UniProt release 2020_04)	COA1	Q9GZY4	no	yes	no	no	no
Whole human reviewed proteome(UniProt release 2020_04)	C11orf96	Q7Z7L8	no	no	no	no	no
Whole human reviewed proteome(UniProt release 2020_04)	CLMN	Q96JQ2	no	no	no	yes	no
Whole human reviewed proteome(UniProt release 2020_04)	CISD2	Q8N5K1	no	no	yes	yes	yes
Whole human reviewed proteome(UniProt release 2020_04)	CSF2RA	P15509	no	yes	no	no	no
Whole human reviewed proteome(UniProt release 2020_04)	C11orf45	Q8TAV5	no	yes	no	no	no
Whole human reviewed proteome(UniProt release 2020_04)	COQ5	Q5HYK3	no	no	no	yes	no
Whole human reviewed proteome(UniProt release 2020_04)	COPS3	Q9UNS2	no	no	no	no	yes
Whole human reviewed proteome(UniProt release 2020_04)	COPS5	Q92905	no	no	no	no	yes
Whole human reviewed proteome(UniProt release 2020_04)	C16orf97	H3BN30	no	no	no	no	no
Whole human reviewed proteome(UniProt release 2020_04)	CRISPLD1	Q9H336	no	no	yes	yes	yes
Whole human reviewed proteome(UniProt release 2020_04)	COG2	Q14746	no	no	no	yes	no
Whole human reviewed proteome(UniProt release 2020_04)	CFL2	Q9Y281	no	no	yes	yes	yes
Whole human reviewed proteome(UniProt release 2020_04)	CYP7B1	O75881	no	no	yes	no	no
Whole human reviewed proteome(UniProt release 2020_04)	CPT1A	P50416	no	no	yes	no	yes
Whole human reviewed proteome(UniProt release 2020_04)	COMMD6	Q7Z4G1	no	no	no	yes	yes
Whole human reviewed proteome(UniProt release 2020_04)	CRIP2	P52943	no	no	yes	no	no
Whole human reviewed proteome(UniProt release 2020_04)	CTCFL	Q8NI51	no	no	yes	no	no
Whole human reviewed proteome(UniProt release 2020_04)	DACT2	Q5SW24	no	no	no	no	no
Whole human reviewed proteome(UniProt release 2020_04)	COL13A1	Q5TAT6	no	no	yes	yes	yes
Whole human reviewed proteome(UniProt release 2020_04)	DPY19L2	Q6NUT2	no	no	yes	no	no
Whole human reviewed proteome(UniProt release 2020_04)	ABHD12B	Q7Z5M8	no	no	yes	yes	no
Whole human reviewed proteome(UniProt release 2020_04)	AKR1B10	O60218	no	no	yes	no	no
Whole human reviewed proteome(UniProt release 2020_04)	ABHD3	Q8WU67	no	no	yes	yes	no
Whole human reviewed proteome(UniProt release 2020_04)	ABT1	Q9ULW3	no	yes	no	no	no
Whole human reviewed proteome(UniProt release 2020_04)	PRKAA2	P54646	no	no	yes	yes	yes
Whole human reviewed proteome(UniProt release 2020_04)	ACSBG2	Q5FVE4	no	no	yes	yes	no
Whole human reviewed proteome(UniProt release 2020_04)	AMIGO2	Q86SJ2	no	no	no	yes	yes
Whole human reviewed proteome(UniProt release 2020_04)	AMN1	Q8IY45	no	yes	no	no	no
Whole human reviewed proteome(UniProt release 2020_04)	AKIRIN2	Q53H80	yes	no	yes	yes	yes
Whole human reviewed proteome(UniProt release 2020_04)	IGFALS	P35858	no	yes	no	no	no
Whole human reviewed proteome(UniProt release 2020_04)	ABCC9	O60706	no	no	yes	no	yes
Whole human reviewed proteome(UniProt release 2020_04)	ALPK1	Q96QP1	no	no	no	yes	no
Whole human reviewed proteome(UniProt release 2020_04)	ADGRB2	O60241	no	no	yes	no	yes
Whole human reviewed proteome(UniProt release 2020_04)	ACACA	Q13085	no	no	no	no	yes
Whole human reviewed proteome(UniProt release 2020_04)	ADGRV1	Q8WXG9	no	yes	no	no	no
Whole human reviewed proteome(UniProt release 2020_04)	ADCK2	Q7Z695	no	no	no	yes	no
Whole human reviewed proteome(UniProt release 2020_04)	AGPS	O00116	no	no	no	yes	yes
Whole human reviewed proteome(UniProt release 2020_04)	ARHGEF40	Q8TER5	no	no	yes	yes	no
Whole human reviewed proteome(UniProt release 2020_04)	ATP11AUN	Q6ZP68	no	no	no	no	no
Whole human reviewed proteome(UniProt release 2020_04)	ARSJ	Q5FYB0	no	no	yes	no	no
Whole human reviewed proteome(UniProt release 2020_04)	AVIL	O75366	no	no	yes	yes	no
Whole human reviewed proteome(UniProt release 2020_04)	C1GALT1C1L	P0DN25	no	no	no	no	no
Whole human reviewed proteome(UniProt release 2020_04)	ATP7A	Q04656	no	no	yes	yes	yes
Whole human reviewed proteome(UniProt release 2020_04)	BRS3	P32247	no	no	yes	yes	yes
Whole human reviewed proteome(UniProt release 2020_04)	BTBD3	Q9Y2F9	no	no	yes	yes	no
Whole human reviewed proteome(UniProt release 2020_04)	C2orf15	Q8WU43	no	yes	no	no	no
Whole human reviewed proteome(UniProt release 2020_04)	CAMSAP1	Q5T5Y3	no	no	yes	yes	yes
Whole human reviewed proteome(UniProt release 2020_04)	C3P1	Q6ZMU1	no	no	no	no	no
Whole human reviewed proteome(UniProt release 2020_04)	C1QTNF8	P60827	no	no	yes	no	no
Whole human reviewed proteome(UniProt release 2020_04)	CASP4	P49662	no	yes	no	no	no
Whole human reviewed proteome(UniProt release 2020_04)	CBLN4	Q9NTU7	no	no	yes	yes	yes
Whole human reviewed proteome(UniProt release 2020_04)	CASP5	P51878	no	yes	no	no	no
Whole human reviewed proteome(UniProt release 2020_04)	CHAD	O15335	no	no	no	no	yes
Whole human reviewed proteome(UniProt release 2020_04)	CENPA	P49450	no	no	no	no	yes
Whole human reviewed proteome(UniProt release 2020_04)	CHD2	O14647	no	no	yes	no	yes
Whole human reviewed proteome(UniProt release 2020_04)	CEACAM5	P06731	no	yes	no	no	no
Whole human reviewed proteome(UniProt release 2020_04)	CHD9	Q3L8U1	no	no	yes	no	yes
Whole human reviewed proteome(UniProt release 2020_04)	CHCHD2P9	Q5T1J5	no	no	no	no	no
Whole human reviewed proteome(UniProt release 2020_04)	CDK2	P24941	yes	no	yes	yes	yes
Whole human reviewed proteome(UniProt release 2020_04)	CCSER1	Q9C0I3	no	yes	no	no	no
Whole human reviewed proteome(UniProt release 2020_04)	C5orf60	A6NFR6	no	no	no	no	no
Whole human reviewed proteome(UniProt release 2020_04)	CGNL1	Q0VF96	no	no	yes	no	no
Whole human reviewed proteome(UniProt release 2020_04)	CIDEB	Q9UHD4	no	yes	no	no	no
Whole human reviewed proteome(UniProt release 2020_04)	LINC00523	Q86TU6	no	no	no	no	no
Whole human reviewed proteome(UniProt release 2020_04)	CD34	P28906	no	yes	no	no	no
Whole human reviewed proteome(UniProt release 2020_04)	CERS5	Q8N5B7	no	no	yes	no	no
Whole human reviewed proteome(UniProt release 2020_04)	C13orf46	A0A1B0GUA9	no	no	no	no	no
Whole human reviewed proteome(UniProt release 2020_04)	PDE6H	Q13956	no	no	no	yes	no
Whole human reviewed proteome(UniProt release 2020_04)	CIR1	Q86X95	no	no	no	no	yes
Whole human reviewed proteome(UniProt release 2020_04)	C12orf4	Q9NQ89	no	yes	no	no	no
Whole human reviewed proteome(UniProt release 2020_04)	C10orf82	Q8WW14	no	yes	no	no	no
Whole human reviewed proteome(UniProt release 2020_04)	CLN3	Q13286	no	yes	no	no	no
Whole human reviewed proteome(UniProt release 2020_04)	CPXCR1	Q8N123	no	yes	no	no	no
Whole human reviewed proteome(UniProt release 2020_04)	CDK5RAP2	Q96SN8	no	yes	no	no	no
Whole human reviewed proteome(UniProt release 2020_04)	C17orf50	Q8WW18	no	yes	no	no	no
Whole human reviewed proteome(UniProt release 2020_04)	CRTAC1	Q9NQ79	no	no	no	yes	yes
Whole human reviewed proteome(UniProt release 2020_04)	COPA	P53621	no	no	no	yes	yes
Whole human reviewed proteome(UniProt release 2020_04)	C19orf73	Q9NVV2	no	yes	no	no	no
Whole human reviewed proteome(UniProt release 2020_04)	COPS2	P61201	no	no	no	no	yes
Whole human reviewed proteome(UniProt release 2020_04)	CRYBG2	Q8N1P7	no	no	yes	no	no
Whole human reviewed proteome(UniProt release 2020_04)	CCS	O14618	no	yes	no	no	no
Whole human reviewed proteome(UniProt release 2020_04)	C16orf71	Q8IYS4	no	no	no	yes	no
Whole human reviewed proteome(UniProt release 2020_04)	COPS4	Q9BT78	no	no	no	no	yes
Whole human reviewed proteome(UniProt release 2020_04)	C7orf65	Q6ZTY9	no	no	no	no	no
Whole human reviewed proteome(UniProt release 2020_04)	COX14	Q96I36	no	yes	no	no	no
Whole human reviewed proteome(UniProt release 2020_04)	CAPNS1	P04632	no	yes	no	no	no
Whole human reviewed proteome(UniProt release 2020_04)	CYP46A1	Q9Y6A2	no	no	no	yes	yes
Whole human reviewed proteome(UniProt release 2020_04)	CROCCP3	Q8IVE0	no	no	no	no	no
Whole human reviewed proteome(UniProt release 2020_04)	CRLF3	Q8IUI8	no	no	no	yes	yes
Whole human reviewed proteome(UniProt release 2020_04)	CPSF3	Q9UKF6	no	no	no	yes	yes
Whole human reviewed proteome(UniProt release 2020_04)	CRNN	Q9UBG3	no	no	no	yes	no
Whole human reviewed proteome(UniProt release 2020_04)	CLCA1	A8K7I4	no	no	no	yes	no
Whole human reviewed proteome(UniProt release 2020_04)	CYP26A1	O43174	no	no	yes	no	yes
Whole human reviewed proteome(UniProt release 2020_04)	CARNS1	A5YM72	no	yes	no	no	no
Whole human reviewed proteome(UniProt release 2020_04)	C16orf95	Q9H693	no	no	no	no	no
Whole human reviewed proteome(UniProt release 2020_04)	CRYGD	P07320	no	no	yes	no	no
Whole human reviewed proteome(UniProt release 2020_04)	CRH	P06850	no	no	no	no	yes
Whole human reviewed proteome(UniProt release 2020_04)	ABHD10	Q9NUJ1	no	no	no	yes	no
Whole human reviewed proteome(UniProt release 2020_04)	ACKR4	Q9NPB9	no	no	yes	yes	no
Whole human reviewed proteome(UniProt release 2020_04)	ANKRD30BL	A7E2S9	no	no	no	no	no
Whole human reviewed proteome(UniProt release 2020_04)	ABHD6	Q9BV23	no	no	no	yes	no
Whole human reviewed proteome(UniProt release 2020_04)	ALS2	Q96Q42	no	no	no	no	yes
Whole human reviewed proteome(UniProt release 2020_04)	AHSA1	O95433	no	no	yes	no	yes
Whole human reviewed proteome(UniProt release 2020_04)	AKR1B1	P15121	no	no	yes	no	no
Whole human reviewed proteome(UniProt release 2020_04)	AGO3	Q9H9G7	no	no	yes	no	yes
Whole human reviewed proteome(UniProt release 2020_04)	ACSF2	Q96CM8	no	no	no	yes	yes
Whole human reviewed proteome(UniProt release 2020_04)	ACSM1	Q08AH1	no	no	yes	no	no
Whole human reviewed proteome(UniProt release 2020_04)	ARL6IP4	Q66PJ3	no	yes	no	no	no
Whole human reviewed proteome(UniProt release 2020_04)	ARMC12	Q5T9G4	no	yes	no	no	no
Whole human reviewed proteome(UniProt release 2020_04)	ANKRD26	Q9UPS8	no	yes	no	no	no
Whole human reviewed proteome(UniProt release 2020_04)	ARL3	P36405	no	no	no	no	yes
Whole human reviewed proteome(UniProt release 2020_04)	ANGPTL5	Q86XS5	no	yes	no	no	no
Whole human reviewed proteome(UniProt release 2020_04)	ASAP2	O43150	yes	no	yes	yes	yes
Whole human reviewed proteome(UniProt release 2020_04)	APOC4	P55056	no	yes	no	no	no
Whole human reviewed proteome(UniProt release 2020_04)	ANGPT1	Q15389	yes	no	yes	yes	yes
Whole human reviewed proteome(UniProt release 2020_04)	ANGPTL3	Q9Y5C1	no	yes	no	no	no
Whole human reviewed proteome(UniProt release 2020_04)	NAGLU	P54802	no	no	no	no	yes
Whole human reviewed proteome(UniProt release 2020_04)	ASB4	Q9Y574	no	no	no	yes	yes
Whole human reviewed proteome(UniProt release 2020_04)	ARPC2	O15144	no	no	no	yes	yes
Whole human reviewed proteome(UniProt release 2020_04)	ABO	P16442	no	no	no	no	no
Whole human reviewed proteome(UniProt release 2020_04)	C1QBP	Q07021	no	yes	no	no	no
Whole human reviewed proteome(UniProt release 2020_04)	BRMS1L	Q5PSV4	no	no	no	no	yes
Whole human reviewed proteome(UniProt release 2020_04)	BMP15	O95972	no	no	no	yes	no
Whole human reviewed proteome(UniProt release 2020_04)	BTG4	Q9NY30	no	no	yes	yes	no
Whole human reviewed proteome(UniProt release 2020_04)	BLOC1S5	Q8TDH9	no	yes	no	no	no
Whole human reviewed proteome(UniProt release 2020_04)	BYSL	Q13895	no	no	no	yes	yes
Whole human reviewed proteome(UniProt release 2020_04)	B3GNT6	Q6ZMB0	no	no	no	yes	no
Whole human reviewed proteome(UniProt release 2020_04)	BHLHB9	Q6PI77	no	yes	no	no	no
Whole human reviewed proteome(UniProt release 2020_04)	CCDC181	Q5TID7	no	no	no	yes	no
Whole human reviewed proteome(UniProt release 2020_04)	CDH15	P55291	no	no	yes	yes	no
Whole human reviewed proteome(UniProt release 2020_04)	BORCS8	Q96FH0	no	no	no	no	no
Whole human reviewed proteome(UniProt release 2020_04)	BAGE5	Q86Y27	no	no	no	no	no
Whole human reviewed proteome(UniProt release 2020_04)	BORCS7	Q96B45	no	no	no	yes	no
Whole human reviewed proteome(UniProt release 2020_04)	TMEM30B	Q3MIR4	no	no	yes	no	no
Whole human reviewed proteome(UniProt release 2020_04)	CHAF1B	Q13112	no	no	no	yes	yes
Whole human reviewed proteome(UniProt release 2020_04)	CA13	Q8N1Q1	no	no	yes	yes	no
Whole human reviewed proteome(UniProt release 2020_04)	C1orf147	Q96MC9	no	no	no	no	no
Whole human reviewed proteome(UniProt release 2020_04)	CAPS2	Q9BXY5	no	no	no	yes	no
Whole human reviewed proteome(UniProt release 2020_04)	CYB561D1	Q8N8Q1	no	no	yes	no	no
Whole human reviewed proteome(UniProt release 2020_04)	CCL20	P78556	no	no	no	yes	no
Whole human reviewed proteome(UniProt release 2020_04)	CHMP1B	Q7LBR1	no	no	no	no	no
Whole human reviewed proteome(UniProt release 2020_04)	CENPM	Q9NSP4	no	yes	no	no	no
Whole human reviewed proteome(UniProt release 2020_04)	CDS1	Q92903	no	no	yes	yes	yes
Whole human reviewed proteome(UniProt release 2020_04)	CDPF1	Q6NVV7	no	yes	no	no	no
Whole human reviewed proteome(UniProt release 2020_04)	CDKN2D	P55273	no	no	yes	no	yes
Whole human reviewed proteome(UniProt release 2020_04)	CDRT15	Q96T59	no	yes	no	no	no
Whole human reviewed proteome(UniProt release 2020_04)	CCN3	P48745	no	no	yes	yes	no
Whole human reviewed proteome(UniProt release 2020_04)	C6orf132	Q5T0Z8	no	no	no	no	no
Whole human reviewed proteome(UniProt release 2020_04)	CFAP20DC	Q6ZVT6	no	no	no	yes	no
Whole human reviewed proteome(UniProt release 2020_04)	CD14	P08571	no	yes	no	no	no
Whole human reviewed proteome(UniProt release 2020_04)	CD1C	P29017	no	yes	no	no	no
Whole human reviewed proteome(UniProt release 2020_04)	CDK15	Q96Q40	no	no	yes	no	no
Whole human reviewed proteome(UniProt release 2020_04)	CEP55	Q53EZ4	no	no	no	yes	yes
Whole human reviewed proteome(UniProt release 2020_04)	CEP85	Q6P2H3	no	no	yes	yes	no
Whole human reviewed proteome(UniProt release 2020_04)	CERS1	P27544	no	yes	no	no	no
Whole human reviewed proteome(UniProt release 2020_04)	CD36	P16671	no	no	yes	no	no
Whole human reviewed proteome(UniProt release 2020_04)	CKS1B	P61024	no	no	no	no	yes
Whole human reviewed proteome(UniProt release 2020_04)	CNOT1	A5YKK6	no	no	no	yes	yes
Whole human reviewed proteome(UniProt release 2020_04)	ALG11	Q2TAA5	no	yes	no	no	no
Whole human reviewed proteome(UniProt release 2020_04)	APH1A	Q96BI3	no	no	yes	yes	yes
Whole human reviewed proteome(UniProt release 2020_04)	ASPHD2	Q6ICH7	no	no	yes	yes	yes
Whole human reviewed proteome(UniProt release 2020_04)	AP1S2	P56377	no	no	yes	yes	yes
Whole human reviewed proteome(UniProt release 2020_04)	ANAPC13	Q9BS18	no	no	no	no	yes
Whole human reviewed proteome(UniProt release 2020_04)	ANKRD42	Q8N9B4	no	no	no	yes	no
Whole human reviewed proteome(UniProt release 2020_04)	AP2A1	O95782	no	no	yes	no	yes
Whole human reviewed proteome(UniProt release 2020_04)	ATP5MPL	P56378	no	no	no	no	no
Whole human reviewed proteome(UniProt release 2020_04)	BTF3	P20290	no	no	yes	no	yes
Whole human reviewed proteome(UniProt release 2020_04)	BBS1	Q8NFJ9	no	yes	no	no	no
Whole human reviewed proteome(UniProt release 2020_04)	BARD1	Q99728	no	no	no	yes	yes
Whole human reviewed proteome(UniProt release 2020_04)	ATP5PD	O75947	no	no	no	no	no
Whole human reviewed proteome(UniProt release 2020_04)	BASP1	P80723	no	no	no	no	no
Whole human reviewed proteome(UniProt release 2020_04)	BUD23	O43709	no	no	no	no	no
Whole human reviewed proteome(UniProt release 2020_04)	BATF2	Q8N1L9	no	no	no	yes	no
Whole human reviewed proteome(UniProt release 2020_04)	BET1	O15155	no	no	no	no	yes
Whole human reviewed proteome(UniProt release 2020_04)	BPIFA3	Q9BQP9	no	no	no	yes	no
Whole human reviewed proteome(UniProt release 2020_04)	BOLA3	Q53S33	no	yes	no	no	no
Whole human reviewed proteome(UniProt release 2020_04)	BAIAP2	Q9UQB8	no	no	yes	yes	yes
Whole human reviewed proteome(UniProt release 2020_04)	CCDC192	P0DO97	no	no	no	no	no
Whole human reviewed proteome(UniProt release 2020_04)	CCDC6	Q16204	no	no	no	yes	yes
Whole human reviewed proteome(UniProt release 2020_04)	BECN2	A8MW95	no	no	no	no	no
Whole human reviewed proteome(UniProt release 2020_04)	CCDC157	Q569K6	no	yes	no	no	no
Whole human reviewed proteome(UniProt release 2020_04)	CCDC194	A0A1B0GVG4	no	no	no	no	no
Whole human reviewed proteome(UniProt release 2020_04)	CCDC189	A1A4V9	no	no	no	yes	no
Whole human reviewed proteome(UniProt release 2020_04)	BCL10	O95999	no	yes	no	no	no
Whole human reviewed proteome(UniProt release 2020_04)	CCDC175	P0C221	no	no	no	yes	no
Whole human reviewed proteome(UniProt release 2020_04)	CCDC159	P0C7I6	no	yes	no	no	no
Whole human reviewed proteome(UniProt release 2020_04)	HCCS	P53701	no	no	no	yes	yes
Whole human reviewed proteome(UniProt release 2020_04)	NOS1AP	O75052	no	yes	no	no	no
Whole human reviewed proteome(UniProt release 2020_04)	CACNG2	Q9Y698	yes	no	yes	yes	yes
Whole human reviewed proteome(UniProt release 2020_04)	CADPS2	Q86UW7	yes	no	yes	yes	yes
Whole human reviewed proteome(UniProt release 2020_04)	CAPS	Q13938	no	no	yes	no	no
Whole human reviewed proteome(UniProt release 2020_04)	CCDC57	Q2TAC2	no	no	no	yes	no
Whole human reviewed proteome(UniProt release 2020_04)	CAPN11	Q9UMQ6	no	no	yes	yes	no
Whole human reviewed proteome(UniProt release 2020_04)	C2orf16	Q68DN1	no	yes	no	no	no
Whole human reviewed proteome(UniProt release 2020_04)	CCL23	P55773	no	no	no	no	no
Whole human reviewed proteome(UniProt release 2020_04)	CBY3	A6NI87	no	no	no	no	no
Whole human reviewed proteome(UniProt release 2020_04)	C2orf78	A6NCI8	no	yes	no	no	no
Whole human reviewed proteome(UniProt release 2020_04)	CCL25	O15444	no	yes	no	no	no
Whole human reviewed proteome(UniProt release 2020_04)	LINC02877	P0CE67	no	no	no	no	no
Whole human reviewed proteome(UniProt release 2020_04)	C1QTNF4	Q9BXJ3	no	no	yes	no	yes
Whole human reviewed proteome(UniProt release 2020_04)	CAPN8	A6NHC0	no	no	yes	no	no
Whole human reviewed proteome(UniProt release 2020_04)	CPA2	P48052	no	no	yes	no	no
Whole human reviewed proteome(UniProt release 2020_04)	C1orf53	Q5VUE5	no	yes	no	no	no
Whole human reviewed proteome(UniProt release 2020_04)	C2CD5	Q86YS7	no	no	no	no	yes
Whole human reviewed proteome(UniProt release 2020_04)	CPO	Q8IVL8	no	yes	no	no	no
Whole human reviewed proteome(UniProt release 2020_04)	CTSL	P07711	no	yes	no	no	no
Whole human reviewed proteome(UniProt release 2020_04)	CHPT1	Q8WUD6	no	no	no	yes	no
Whole human reviewed proteome(UniProt release 2020_04)	NEDD9	Q14511	no	no	yes	no	yes
Whole human reviewed proteome(UniProt release 2020_04)	CECR9	P0C854	no	no	no	no	no
Whole human reviewed proteome(UniProt release 2020_04)	HSPD1	P10809	no	no	no	no	yes
Whole human reviewed proteome(UniProt release 2020_04)	C5orf22	Q49AR2	no	no	no	no	yes
Whole human reviewed proteome(UniProt release 2020_04)	C5orf67	F2Z3F1	no	no	no	no	no
Whole human reviewed proteome(UniProt release 2020_04)	CD7	P09564	no	yes	no	no	no
Whole human reviewed proteome(UniProt release 2020_04)	CD63	P08962	no	no	no	no	yes
Whole human reviewed proteome(UniProt release 2020_04)	CD80	P33681	no	no	no	yes	no
Whole human reviewed proteome(UniProt release 2020_04)	CD5L	O43866	no	no	no	yes	no
Whole human reviewed proteome(UniProt release 2020_04)	LINC00587	B1AMM8	no	no	no	no	no
Whole human reviewed proteome(UniProt release 2020_04)	CDX2	Q99626	no	no	yes	yes	yes
Whole human reviewed proteome(UniProt release 2020_04)	CDK9	P50750	no	no	no	no	yes
Whole human reviewed proteome(UniProt release 2020_04)	CFAP99	D6REC4	no	no	no	no	no
Whole human reviewed proteome(UniProt release 2020_04)	CCNYL1	Q8N7R7	no	no	yes	no	yes
Whole human reviewed proteome(UniProt release 2020_04)	CFAP97D1	B2RV13	no	no	no	yes	no
Whole human reviewed proteome(UniProt release 2020_04)	CCDC158	Q5M9N0	no	no	no	yes	no
Whole human reviewed proteome(UniProt release 2020_04)	CHSY3	Q70JA7	no	no	no	no	yes
Whole human reviewed proteome(UniProt release 2020_04)	LINC00473	A8K010	no	no	no	no	no
Whole human reviewed proteome(UniProt release 2020_04)	CNTLN	Q9NXG0	no	no	no	no	no
Whole human reviewed proteome(UniProt release 2020_04)	CLPP	Q16740	no	no	no	yes	yes
Whole human reviewed proteome(UniProt release 2020_04)	CDKN1A	P38936	no	no	no	no	yes
Whole human reviewed proteome(UniProt release 2020_04)	CD3D	P04234	no	yes	no	no	no
Whole human reviewed proteome(UniProt release 2020_04)	CLCA4	Q14CN2	no	yes	no	no	no
Whole human reviewed proteome(UniProt release 2020_04)	CERKL	Q49MI3	no	yes	no	no	no
Whole human reviewed proteome(UniProt release 2020_04)	CNTRL	Q7Z7A1	no	no	no	yes	no
Whole human reviewed proteome(UniProt release 2020_04)	C15orf40	Q8WUR7	no	yes	no	no	no
Whole human reviewed proteome(UniProt release 2020_04)	CLEC18B	Q6UXF7	no	no	no	no	no
Whole human reviewed proteome(UniProt release 2020_04)	CLDN25	C9JDP6	no	yes	no	no	no
Whole human reviewed proteome(UniProt release 2020_04)	CLNK	Q7Z7G1	no	no	yes	no	no
Whole human reviewed proteome(UniProt release 2020_04)	CLIC4	Q9Y696	no	no	yes	yes	no
Whole human reviewed proteome(UniProt release 2020_04)	COPZ1	P61923	no	no	yes	yes	yes
Whole human reviewed proteome(UniProt release 2020_04)	LINC01561	Q8N1V8	no	no	no	no	no
Whole human reviewed proteome(UniProt release 2020_04)	C19orf54	Q5BKX5	no	no	no	yes	no
Whole human reviewed proteome(UniProt release 2020_04)	C17orf47	Q8NEP4	no	no	no	no	no
Whole human reviewed proteome(UniProt release 2020_04)	CCSMST1	Q4G0I0	no	yes	no	no	no
Whole human reviewed proteome(UniProt release 2020_04)	CSMD2	Q7Z408	no	no	yes	no	no
Whole human reviewed proteome(UniProt release 2020_04)	CPNE5	Q9HCH3	no	no	yes	yes	yes
Whole human reviewed proteome(UniProt release 2020_04)	EBF4	Q9BQW3	no	no	yes	yes	no
Whole human reviewed proteome(UniProt release 2020_04)	CYP19A1	P11511	no	yes	no	no	no
Whole human reviewed proteome(UniProt release 2020_04)	CYP17A1	P05093	no	yes	no	no	no
Whole human reviewed proteome(UniProt release 2020_04)	SYNE2	Q8WXH0	no	no	yes	no	no
Whole human reviewed proteome(UniProt release 2020_04)	TAX1BP1	Q86VP1	no	no	yes	yes	yes
Whole human reviewed proteome(UniProt release 2020_04)	TCTE3	Q8IZS6	no	yes	no	no	no
Whole human reviewed proteome(UniProt release 2020_04)	TAGLN3	Q9UI15	no	no	yes	yes	yes
Whole human reviewed proteome(UniProt release 2020_04)	TAF6	P49848	no	no	no	no	yes
Whole human reviewed proteome(UniProt release 2020_04)	TAF4B	Q92750	no	no	yes	yes	yes
Whole human reviewed proteome(UniProt release 2020_04)	TIMP2	P16035	no	no	yes	no	no
Whole human reviewed proteome(UniProt release 2020_04)	OCLM	Q9Y5M6	no	no	no	no	no
Whole human reviewed proteome(UniProt release 2020_04)	TMEM60	Q9H2L4	no	no	no	no	no
Whole human reviewed proteome(UniProt release 2020_04)	TMEM52	Q8NDY8	no	yes	no	no	no
Whole human reviewed proteome(UniProt release 2020_04)	TGFBR2	P37173	no	no	yes	yes	yes
Whole human reviewed proteome(UniProt release 2020_04)	TMEM102	Q8N9M5	no	no	no	yes	no
Whole human reviewed proteome(UniProt release 2020_04)	FAS	P25445	no	no	no	yes	yes
Whole human reviewed proteome(UniProt release 2020_04)	TMIGD1	Q6UXZ0	no	yes	no	no	no
Whole human reviewed proteome(UniProt release 2020_04)	TMEM196	Q5HYL7	no	no	no	yes	no
Whole human reviewed proteome(UniProt release 2020_04)	TAC1	P20366	no	no	no	yes	yes
Whole human reviewed proteome(UniProt release 2020_04)	TMEM141	Q96I45	no	yes	no	no	no
Whole human reviewed proteome(UniProt release 2020_04)	TMEM131	Q92545	no	no	no	no	yes
Whole human reviewed proteome(UniProt release 2020_04)	TLR1	Q15399	no	no	yes	no	no
Whole human reviewed proteome(UniProt release 2020_04)	TRBJ2-1	A0A0A0MTA7	no	no	no	no	no
Whole human reviewed proteome(UniProt release 2020_04)	TNFRSF11A	Q9Y6Q6	no	no	no	yes	yes
Whole human reviewed proteome(UniProt release 2020_04)	TMEM138	Q9NPI0	no	no	no	no	no
Whole human reviewed proteome(UniProt release 2020_04)	TMEM104	Q8NE00	no	no	no	yes	no
Whole human reviewed proteome(UniProt release 2020_04)	TRIM2	Q9C040	no	no	yes	no	yes
Whole human reviewed proteome(UniProt release 2020_04)	TMEM45B	Q96B21	no	no	yes	yes	no
Whole human reviewed proteome(UniProt release 2020_04)	TRGV8	A0A0C4DH27	no	no	no	no	no
Whole human reviewed proteome(UniProt release 2020_04)	TRIM58	Q8NG06	no	no	yes	yes	no
Whole human reviewed proteome(UniProt release 2020_04)	TRHDE	Q9UKU6	no	no	no	yes	yes
Whole human reviewed proteome(UniProt release 2020_04)	TRAV39	A0A0B4J263	no	no	no	no	no
Whole human reviewed proteome(UniProt release 2020_04)	TRAV18	A0A075B6X5	no	no	no	no	no
Whole human reviewed proteome(UniProt release 2020_04)	TRIM56	Q9BRZ2	no	no	no	no	yes
Whole human reviewed proteome(UniProt release 2020_04)	TRBV27	A0A0K0K1C4	no	no	no	no	no
Whole human reviewed proteome(UniProt release 2020_04)	TRBV4-2	A0A539	no	no	no	no	no
Whole human reviewed proteome(UniProt release 2020_04)	TRAV8-3	A0A0A6YYJ7	no	no	no	no	no
Whole human reviewed proteome(UniProt release 2020_04)	TXNDC12	O95881	no	yes	no	no	no
Whole human reviewed proteome(UniProt release 2020_04)	TRBV4-3	A0A589	no	no	no	no	no
Whole human reviewed proteome(UniProt release 2020_04)	TRBV3-1	A0A576	no	no	no	no	no
Whole human reviewed proteome(UniProt release 2020_04)	TRAV9-2	A0A087WT02	no	no	no	no	no
Whole human reviewed proteome(UniProt release 2020_04)	TSPAN16	Q9UKR8	no	yes	no	no	no
Whole human reviewed proteome(UniProt release 2020_04)	TSPAN5	P62079	yes	no	yes	yes	yes
Whole human reviewed proteome(UniProt release 2020_04)	TTC13	Q8NBP0	no	no	no	yes	yes
Whole human reviewed proteome(UniProt release 2020_04)	TSPO2	Q5TGU0	no	no	no	yes	no
Whole human reviewed proteome(UniProt release 2020_04)	TSPY1	Q01534	no	no	no	no	no
Whole human reviewed proteome(UniProt release 2020_04)	TTC41P	Q6P2S7	no	no	no	no	no
Whole human reviewed proteome(UniProt release 2020_04)	TTC4	O95801	no	no	no	yes	yes
Whole human reviewed proteome(UniProt release 2020_04)	TSPAN14	Q8NG11	no	no	yes	yes	yes
Whole human reviewed proteome(UniProt release 2020_04)	TTC3	P53804	no	yes	no	no	no
Whole human reviewed proteome(UniProt release 2020_04)	TTC5	Q8N0Z6	no	no	no	yes	no
Whole human reviewed proteome(UniProt release 2020_04)	TTYH2	Q9BSA4	no	no	yes	yes	yes
Whole human reviewed proteome(UniProt release 2020_04)	UBE2QL1	A1L167	no	no	no	no	no
Whole human reviewed proteome(UniProt release 2020_04)	USP16	Q9Y5T5	no	no	yes	no	yes
Whole human reviewed proteome(UniProt release 2020_04)	UPK3A	O75631	no	no	no	yes	no
Whole human reviewed proteome(UniProt release 2020_04)	ERVK-24	P63129	no	no	no	no	no
Whole human reviewed proteome(UniProt release 2020_04)	VPS45	Q9NRW7	no	no	no	yes	yes
Whole human reviewed proteome(UniProt release 2020_04)	ATP6V1E2	Q96A05	no	no	no	yes	no
Whole human reviewed proteome(UniProt release 2020_04)	VLDLR	P98155	no	no	yes	yes	yes
Whole human reviewed proteome(UniProt release 2020_04)	SLC18A3	Q16572	no	yes	no	no	no
Whole human reviewed proteome(UniProt release 2020_04)	VAMP7	P51809	no	yes	no	no	no
Whole human reviewed proteome(UniProt release 2020_04)	VSTM2A	Q8TAG5	no	no	no	yes	no
Whole human reviewed proteome(UniProt release 2020_04)	WDR20	Q8TBZ3	no	no	yes	no	yes
Whole human reviewed proteome(UniProt release 2020_04)	WDR43	Q15061	no	no	no	yes	yes
Whole human reviewed proteome(UniProt release 2020_04)	WNK4	Q96J92	no	no	no	no	no
Whole human reviewed proteome(UniProt release 2020_04)	WFIKKN2	Q8TEU8	no	no	yes	yes	no
Whole human reviewed proteome(UniProt release 2020_04)	WFIKKN1	Q96NZ8	no	no	yes	no	no
Whole human reviewed proteome(UniProt release 2020_04)	nan	Q6AWC8	no	no	no	no	no
Whole human reviewed proteome(UniProt release 2020_04)	nan	A8MUN3	no	no	no	no	no
Whole human reviewed proteome(UniProt release 2020_04)	PRO3102	Q9H379	no	no	no	no	no
Whole human reviewed proteome(UniProt release 2020_04)	nan	Q96MF0	no	no	no	no	no
Whole human reviewed proteome(UniProt release 2020_04)	nan	Q8N814	no	no	no	no	no
Whole human reviewed proteome(UniProt release 2020_04)	ZNF230	Q9UIE0	no	yes	no	no	no
Whole human reviewed proteome(UniProt release 2020_04)	ZNF483	Q8TF39	no	yes	no	no	no
Whole human reviewed proteome(UniProt release 2020_04)	ZMAT5	Q9UDW3	no	yes	no	no	no
Whole human reviewed proteome(UniProt release 2020_04)	ZNF56	Q15929	no	no	no	no	no
Whole human reviewed proteome(UniProt release 2020_04)	ZFR2	Q9UPR6	no	no	yes	no	no
Whole human reviewed proteome(UniProt release 2020_04)	ZNF675	Q8TD23	no	no	yes	no	no
Whole human reviewed proteome(UniProt release 2020_04)	ZNF705D	P0CH99	no	no	no	no	no
Whole human reviewed proteome(UniProt release 2020_04)	ZBTB20	Q9HC78	no	no	no	no	yes
Whole human reviewed proteome(UniProt release 2020_04)	ZNF677	Q86XU0	no	yes	no	no	no
Whole human reviewed proteome(UniProt release 2020_04)	MRPL10	Q7Z7H8	no	no	no	yes	no
Whole human reviewed proteome(UniProt release 2020_04)	RNF31	Q96EP0	no	no	no	yes	yes
Whole human reviewed proteome(UniProt release 2020_04)	ROM1	Q03395	no	no	yes	yes	no
Whole human reviewed proteome(UniProt release 2020_04)	RRS1	Q15050	no	no	no	no	yes
Whole human reviewed proteome(UniProt release 2020_04)	RPS5	P46782	no	no	no	yes	yes
Whole human reviewed proteome(UniProt release 2020_04)	SLC22A20P	A6NK97	no	no	no	no	no
Whole human reviewed proteome(UniProt release 2020_04)	SAMD15	Q9P1V8	no	yes	no	no	no
Whole human reviewed proteome(UniProt release 2020_04)	SLC47A1	Q96FL8	no	no	no	yes	no
Whole human reviewed proteome(UniProt release 2020_04)	SLC22A13	Q9Y226	no	no	yes	no	no
Whole human reviewed proteome(UniProt release 2020_04)	SOCS5	O75159	no	no	yes	yes	yes
Whole human reviewed proteome(UniProt release 2020_04)	SRPRB	Q9Y5M8	no	yes	no	no	no
Whole human reviewed proteome(UniProt release 2020_04)	SMOC1	Q9H4F8	no	no	yes	no	yes
Whole human reviewed proteome(UniProt release 2020_04)	SLA2	Q9H6Q3	no	no	yes	no	yes
Whole human reviewed proteome(UniProt release 2020_04)	SNRPD2	P62316	no	no	no	no	yes
Whole human reviewed proteome(UniProt release 2020_04)	DARS1	P14868	no	no	no	yes	no
Whole human reviewed proteome(UniProt release 2020_04)	SSX3	Q99909	no	yes	no	no	no
Whole human reviewed proteome(UniProt release 2020_04)	STARD3	Q14849	no	no	yes	yes	yes
Whole human reviewed proteome(UniProt release 2020_04)	ERVW-1	Q9UQF0	no	yes	no	no	no
Whole human reviewed proteome(UniProt release 2020_04)	STMN2	Q93045	yes	no	yes	yes	yes
Whole human reviewed proteome(UniProt release 2020_04)	STARD7	Q9NQZ5	no	no	no	no	yes
Whole human reviewed proteome(UniProt release 2020_04)	STK11	Q15831	no	no	no	no	yes
Whole human reviewed proteome(UniProt release 2020_04)	STOX2	Q9P2F5	yes	no	yes	yes	yes
Whole human reviewed proteome(UniProt release 2020_04)	STIM1	Q13586	yes	no	yes	yes	yes
Whole human reviewed proteome(UniProt release 2020_04)	SSMEM1	Q8WWF3	no	yes	no	no	no
Whole human reviewed proteome(UniProt release 2020_04)	QARS1	P47897	no	no	no	no	no
Whole human reviewed proteome(UniProt release 2020_04)	TEX49	A0A1B0GTD5	no	no	no	no	no
Whole human reviewed proteome(UniProt release 2020_04)	TAS2R45	P59539	no	no	no	no	no
Whole human reviewed proteome(UniProt release 2020_04)	SYT4	Q9H2B2	no	no	yes	no	yes
Whole human reviewed proteome(UniProt release 2020_04)	TBC1D3C	Q6IPX1	no	no	no	no	no
Whole human reviewed proteome(UniProt release 2020_04)	CCT6B	Q92526	no	no	no	no	yes
Whole human reviewed proteome(UniProt release 2020_04)	TCTN1	Q2MV58	no	yes	no	no	no
Whole human reviewed proteome(UniProt release 2020_04)	PRSS21	Q9Y6M0	no	no	yes	no	no
Whole human reviewed proteome(UniProt release 2020_04)	CCT6A	P40227	no	no	no	no	yes
Whole human reviewed proteome(UniProt release 2020_04)	TECR	Q9NZ01	no	no	yes	no	yes
Whole human reviewed proteome(UniProt release 2020_04)	CD96	P40200	no	yes	no	no	no
Whole human reviewed proteome(UniProt release 2020_04)	TRIM17	Q9Y577	no	no	yes	no	no
Whole human reviewed proteome(UniProt release 2020_04)	TRIM11	Q96F44	no	no	no	no	yes
Whole human reviewed proteome(UniProt release 2020_04)	TOMM70	O94826	no	no	no	yes	yes
Whole human reviewed proteome(UniProt release 2020_04)	TPBG	Q13641	no	no	no	yes	no
Whole human reviewed proteome(UniProt release 2020_04)	TRIM5	Q9C035	no	no	yes	no	no
Whole human reviewed proteome(UniProt release 2020_04)	TRIM46	Q7Z4K8	yes	no	yes	yes	yes
Whole human reviewed proteome(UniProt release 2020_04)	TRIM49	P0CI25	no	no	no	no	no
Whole human reviewed proteome(UniProt release 2020_04)	TSKS	Q9UJT2	no	no	no	yes	yes
Whole human reviewed proteome(UniProt release 2020_04)	TPSG1	Q9NRR2	no	no	yes	no	no
Whole human reviewed proteome(UniProt release 2020_04)	UBE2G1	P62253	no	no	no	no	yes
Whole human reviewed proteome(UniProt release 2020_04)	TMSB10	P63313	no	yes	no	no	no
Whole human reviewed proteome(UniProt release 2020_04)	UBE2J1	Q9Y385	no	no	no	yes	yes
Whole human reviewed proteome(UniProt release 2020_04)	TRPM4	Q8TD43	no	no	yes	no	no
Whole human reviewed proteome(UniProt release 2020_04)	URAD	A6NGE7	no	yes	no	no	no
Whole human reviewed proteome(UniProt release 2020_04)	USP14	P54578	no	no	no	yes	yes
Whole human reviewed proteome(UniProt release 2020_04)	USP10	Q14694	no	no	no	no	yes
Whole human reviewed proteome(UniProt release 2020_04)	USP21	Q9UK80	no	no	yes	yes	yes
Whole human reviewed proteome(UniProt release 2020_04)	VAV2	P52735	no	no	yes	no	yes
Whole human reviewed proteome(UniProt release 2020_04)	USP42	Q9H9J4	no	no	yes	yes	yes
Whole human reviewed proteome(UniProt release 2020_04)	VCPIP1	Q96JH7	no	no	no	no	yes
Whole human reviewed proteome(UniProt release 2020_04)	VENTX	O95231	no	yes	no	no	no
Whole human reviewed proteome(UniProt release 2020_04)	VDAC3	Q9Y277	no	no	yes	no	yes
Whole human reviewed proteome(UniProt release 2020_04)	VAMP5	O95183	no	yes	no	no	no
Whole human reviewed proteome(UniProt release 2020_04)	PNAS-138	Q9BZS9	no	no	no	no	no
Whole human reviewed proteome(UniProt release 2020_04)	SLC30A1	Q9Y6M5	no	no	no	yes	yes
Whole human reviewed proteome(UniProt release 2020_04)	ZNF207	O43670	no	no	no	no	yes
Whole human reviewed proteome(UniProt release 2020_04)	ZNF266	Q14584	no	yes	no	no	no
Whole human reviewed proteome(UniProt release 2020_04)	ZNF284	Q2VY69	no	yes	no	no	no
Whole human reviewed proteome(UniProt release 2020_04)	ZNF287	Q9HBT7	no	no	yes	no	yes
Whole human reviewed proteome(UniProt release 2020_04)	ZNF267	Q14586	no	no	yes	no	no
Whole human reviewed proteome(UniProt release 2020_04)	ZNF268	Q14587	no	no	yes	no	no
Whole human reviewed proteome(UniProt release 2020_04)	ZNF707	Q96C28	no	yes	no	no	no
Whole human reviewed proteome(UniProt release 2020_04)	ZNF768	Q9H5H4	no	no	no	no	yes
Whole human reviewed proteome(UniProt release 2020_04)	ZNF430	Q9H8G1	no	yes	no	no	no
Whole human reviewed proteome(UniProt release 2020_04)	ZNF833P	Q6ZTB9	no	no	no	no	no
Whole human reviewed proteome(UniProt release 2020_04)	ZNF823	P16415	no	yes	no	no	no
Whole human reviewed proteome(UniProt release 2020_04)	ZNF10	P21506	no	yes	no	no	no
Whole human reviewed proteome(UniProt release 2020_04)	ZNF493	Q6ZR52	no	no	yes	no	no
Whole human reviewed proteome(UniProt release 2020_04)	ZNF90	Q03938	no	yes	no	no	no
Whole human reviewed proteome(UniProt release 2020_04)	ZNF566	Q969W8	no	no	yes	no	no
Whole human reviewed proteome(UniProt release 2020_04)	ZMYM3	Q14202	yes	no	yes	yes	yes
Whole human reviewed proteome(UniProt release 2020_04)	ZBTB12	Q9Y330	no	no	no	no	yes
Whole human reviewed proteome(UniProt release 2020_04)	ZSWIM7	Q19AV6	no	yes	no	no	no
Whole human reviewed proteome(UniProt release 2020_04)	ZNF649	Q9BS31	no	no	no	no	no
Whole human reviewed proteome(UniProt release 2020_04)	ZIM3	Q96PE6	no	yes	no	no	no
Whole human reviewed proteome(UniProt release 2020_04)	ZBTB46	Q86UZ6	no	no	yes	no	yes
Whole human reviewed proteome(UniProt release 2020_04)	ZDHHC2	Q9UIJ5	no	no	yes	no	no
Whole human reviewed proteome(UniProt release 2020_04)	ZBTB16	Q05516	no	no	no	no	yes
Whole human reviewed proteome(UniProt release 2020_04)	ZFP82	Q8N141	no	no	no	no	yes
Whole human reviewed proteome(UniProt release 2020_04)	ZNF682	O95780	no	yes	no	no	no
Whole human reviewed proteome(UniProt release 2020_04)	SRSF11	Q05519	no	no	no	no	yes
Whole human reviewed proteome(UniProt release 2020_04)	SLITRK1	Q96PX8	no	no	no	no	yes
Whole human reviewed proteome(UniProt release 2020_04)	SNAPC3	Q92966	no	no	no	yes	no
Whole human reviewed proteome(UniProt release 2020_04)	SRSF10	O75494	no	no	yes	no	no
Whole human reviewed proteome(UniProt release 2020_04)	SKIDA1	Q1XH10	no	no	no	no	no
Whole human reviewed proteome(UniProt release 2020_04)	SPATA48	A4D263	no	no	no	no	no
Whole human reviewed proteome(UniProt release 2020_04)	CD84	Q9UIB8	no	yes	no	no	no
Whole human reviewed proteome(UniProt release 2020_04)	SPTBN5	Q9NRC6	no	yes	no	no	no
Whole human reviewed proteome(UniProt release 2020_04)	SWT1	Q5T5J6	no	yes	no	no	no
Whole human reviewed proteome(UniProt release 2020_04)	STT3A	P46977	no	no	no	yes	yes
Whole human reviewed proteome(UniProt release 2020_04)	ERVFRD-1	P60508	no	yes	no	no	no
Whole human reviewed proteome(UniProt release 2020_04)	SWAP70	Q9UH65	no	no	yes	yes	yes
Whole human reviewed proteome(UniProt release 2020_04)	STX19	Q8N4C7	no	yes	no	no	no
Whole human reviewed proteome(UniProt release 2020_04)	STAU1	O95793	no	no	yes	no	yes
Whole human reviewed proteome(UniProt release 2020_04)	SUGP1	Q8IWZ8	no	no	no	no	yes
Whole human reviewed proteome(UniProt release 2020_04)	SYN1	P17600	no	no	yes	no	yes
Whole human reviewed proteome(UniProt release 2020_04)	SYNC	Q9H7C4	no	no	no	yes	no
Whole human reviewed proteome(UniProt release 2020_04)	TEX46	H3BTG2	no	no	no	no	no
Whole human reviewed proteome(UniProt release 2020_04)	TAS2R39	P59534	no	yes	no	no	no
Whole human reviewed proteome(UniProt release 2020_04)	TAS2R41	P59536	no	yes	no	no	no
Whole human reviewed proteome(UniProt release 2020_04)	TAS2R30	P59541	no	yes	no	no	no
Whole human reviewed proteome(UniProt release 2020_04)	CCT4	P50991	no	no	no	no	yes
Whole human reviewed proteome(UniProt release 2020_04)	SYT14	Q8NB59	yes	no	yes	yes	yes
Whole human reviewed proteome(UniProt release 2020_04)	TCOF1	Q13428	no	no	no	no	yes
Whole human reviewed proteome(UniProt release 2020_04)	DNTT	P04053	no	no	no	yes	yes
Whole human reviewed proteome(UniProt release 2020_04)	TBCCD1	Q9NVR7	no	no	no	yes	no
Whole human reviewed proteome(UniProt release 2020_04)	TBX22	Q9Y458	no	no	yes	no	yes
Whole human reviewed proteome(UniProt release 2020_04)	TBX19	O60806	no	no	yes	yes	no
Whole human reviewed proteome(UniProt release 2020_04)	TMEM131L	A2VDJ0	no	no	no	no	yes
Whole human reviewed proteome(UniProt release 2020_04)	TCL1A	P56279	no	no	no	yes	no
Whole human reviewed proteome(UniProt release 2020_04)	TMEM120B	A0PK00	no	no	yes	yes	yes
Whole human reviewed proteome(UniProt release 2020_04)	TCEA2	Q15560	no	no	yes	no	yes
Whole human reviewed proteome(UniProt release 2020_04)	TAF5	Q15542	no	no	no	yes	yes
Whole human reviewed proteome(UniProt release 2020_04)	THAP3	Q8WTV1	no	no	no	yes	no
Whole human reviewed proteome(UniProt release 2020_04)	TMIE	Q8NEW7	no	yes	no	no	no
Whole human reviewed proteome(UniProt release 2020_04)	TMEM156	Q8N614	no	yes	no	no	no
Whole human reviewed proteome(UniProt release 2020_04)	TIA1	P31483	no	no	yes	yes	yes
Whole human reviewed proteome(UniProt release 2020_04)	THOC1	Q96FV9	no	no	no	no	yes
Whole human reviewed proteome(UniProt release 2020_04)	TGFB1	P01137	no	no	no	no	yes
Whole human reviewed proteome(UniProt release 2020_04)	TMEM186	Q96B77	no	yes	no	no	no
Whole human reviewed proteome(UniProt release 2020_04)	TOR1AIP2	Q8NFQ8	no	no	no	yes	no
Whole human reviewed proteome(UniProt release 2020_04)	TMEM210	A6NLX4	no	yes	no	no	no
Whole human reviewed proteome(UniProt release 2020_04)	TGIF2	Q9GZN2	no	no	yes	no	yes
Whole human reviewed proteome(UniProt release 2020_04)	TANGO2	Q6ICL3	no	yes	no	no	no
Whole human reviewed proteome(UniProt release 2020_04)	TRBJ2-5	A0A0A0MTA4	no	no	no	no	no
Whole human reviewed proteome(UniProt release 2020_04)	TMEM135	Q86UB9	no	no	no	yes	yes
Whole human reviewed proteome(UniProt release 2020_04)	TMEM121	Q9BTD3	no	yes	no	no	no
Whole human reviewed proteome(UniProt release 2020_04)	TRO	Q12816	no	yes	no	no	no
Whole human reviewed proteome(UniProt release 2020_04)	TRDJ1	A0A075B706	no	no	no	no	no
Whole human reviewed proteome(UniProt release 2020_04)	THPO	P40225	no	yes	no	no	no
Whole human reviewed proteome(UniProt release 2020_04)	TYSND1	Q2T9J0	no	no	no	yes	no
Whole human reviewed proteome(UniProt release 2020_04)	TRAV19	A0A0A6YYK7	no	no	no	no	no
Whole human reviewed proteome(UniProt release 2020_04)	TRIM67	Q6ZTA4	no	no	yes	no	yes
Whole human reviewed proteome(UniProt release 2020_04)	TRAV8-6	A0A0B4J262	no	no	no	no	no
Whole human reviewed proteome(UniProt release 2020_04)	TRBV6-8	A0A0A6YYG3	no	no	no	no	no
Whole human reviewed proteome(UniProt release 2020_04)	TWSG1	Q9GZX9	no	no	no	yes	yes
Whole human reviewed proteome(UniProt release 2020_04)	nan	Q5VV11	no	no	no	no	no
Whole human reviewed proteome(UniProt release 2020_04)	TRBV7-6	A0A1B0GX31	no	no	no	no	no
Whole human reviewed proteome(UniProt release 2020_04)	TEX101	Q9BY14	no	yes	no	no	no
Whole human reviewed proteome(UniProt release 2020_04)	TTC12	Q9H892	no	no	no	yes	no
Whole human reviewed proteome(UniProt release 2020_04)	SLC46A2	Q9BY10	no	no	yes	yes	no
Whole human reviewed proteome(UniProt release 2020_04)	TSC1	Q92574	no	no	no	no	yes
Whole human reviewed proteome(UniProt release 2020_04)	TTC8	Q8TAM2	no	no	no	yes	yes
Whole human reviewed proteome(UniProt release 2020_04)	TDP1	Q9NUW8	no	no	no	no	yes
Whole human reviewed proteome(UniProt release 2020_04)	TSKU	Q8WUA8	no	no	no	yes	no
Whole human reviewed proteome(UniProt release 2020_04)	TSACC	Q96A04	no	yes	no	no	no
Whole human reviewed proteome(UniProt release 2020_04)	TTLL10	Q6ZVT0	no	yes	no	no	no
Whole human reviewed proteome(UniProt release 2020_04)	USP12	O75317	no	no	yes	no	yes
Whole human reviewed proteome(UniProt release 2020_04)	RAET1L	Q5VY80	no	yes	no	no	no
Whole human reviewed proteome(UniProt release 2020_04)	UGT2B17	O75795	no	no	yes	no	no
Whole human reviewed proteome(UniProt release 2020_04)	UCP3	P55916	no	no	yes	no	no
Whole human reviewed proteome(UniProt release 2020_04)	USH1C	Q9Y6N9	no	no	no	yes	yes
Whole human reviewed proteome(UniProt release 2020_04)	UBE3D	Q7Z6J8	no	no	no	yes	no
Whole human reviewed proteome(UniProt release 2020_04)	USP45	Q70EL2	no	no	yes	yes	no
Whole human reviewed proteome(UniProt release 2020_04)	UBE2Z	Q9H832	no	no	no	yes	yes
Whole human reviewed proteome(UniProt release 2020_04)	VPS16	Q9H269	no	no	no	yes	no
Whole human reviewed proteome(UniProt release 2020_04)	USP46	P62068	yes	no	yes	yes	yes
Whole human reviewed proteome(UniProt release 2020_04)	USP34	Q70CQ2	no	no	no	no	yes
Whole human reviewed proteome(UniProt release 2020_04)	VEGFA	P15692	no	no	yes	no	no
Whole human reviewed proteome(UniProt release 2020_04)	VAMP8	Q9BV40	no	no	no	no	yes
Whole human reviewed proteome(UniProt release 2020_04)	WDR88	Q6ZMY6	no	yes	no	no	no
Whole human reviewed proteome(UniProt release 2020_04)	XPO1	O14980	no	no	no	yes	yes
Whole human reviewed proteome(UniProt release 2020_04)	XAGE5	Q8WWM1	no	yes	no	no	no
Whole human reviewed proteome(UniProt release 2020_04)	XAGE3	Q8WTP9	no	yes	no	no	no
Whole human reviewed proteome(UniProt release 2020_04)	XRCC2	O43543	no	no	no	yes	no
Whole human reviewed proteome(UniProt release 2020_04)	WASHC4	Q2M389	no	no	no	yes	no
Whole human reviewed proteome(UniProt release 2020_04)	WDR18	Q9BV38	no	no	no	yes	yes
Whole human reviewed proteome(UniProt release 2020_04)	WAPL	Q7Z5K2	no	no	no	yes	yes
Whole human reviewed proteome(UniProt release 2020_04)	WDR11	Q9BZH6	no	yes	no	no	no
Whole human reviewed proteome(UniProt release 2020_04)	XK	P51811	no	no	no	no	yes
Whole human reviewed proteome(UniProt release 2020_04)	WDR45	Q9Y484	no	no	no	no	yes
Whole human reviewed proteome(UniProt release 2020_04)	VTCN1	Q7Z7D3	no	no	no	yes	no
Whole human reviewed proteome(UniProt release 2020_04)	VRK3	Q8IV63	no	no	yes	yes	no
Whole human reviewed proteome(UniProt release 2020_04)	nan	A8MTW9	no	no	no	no	no
Whole human reviewed proteome(UniProt release 2020_04)	nan	Q6ZTK2	no	no	no	no	no
Whole human reviewed proteome(UniProt release 2020_04)	nan	Q8NAQ8	no	no	no	no	no
Whole human reviewed proteome(UniProt release 2020_04)	nan	Q6ZQY7	no	no	no	no	no
Whole human reviewed proteome(UniProt release 2020_04)	ZW10	O43264	no	no	no	yes	yes
Whole human reviewed proteome(UniProt release 2020_04)	ZNF321P	Q8N8H1	no	no	no	no	no
Whole human reviewed proteome(UniProt release 2020_04)	ZNF75D	P51815	no	yes	no	no	no
Whole human reviewed proteome(UniProt release 2020_04)	ZNF440	Q8IYI8	no	yes	no	no	no
Whole human reviewed proteome(UniProt release 2020_04)	ZNF773	Q6PK81	no	yes	no	no	no
Whole human reviewed proteome(UniProt release 2020_04)	ZNF506	Q5JVG8	no	no	yes	no	no
Whole human reviewed proteome(UniProt release 2020_04)	ZSCAN31	Q96LW9	no	yes	no	no	no
Whole human reviewed proteome(UniProt release 2020_04)	ZSCAN25	Q6NSZ9	no	yes	no	no	no
Whole human reviewed proteome(UniProt release 2020_04)	ZNF572	Q7Z3I7	no	yes	no	no	no
Whole human reviewed proteome(UniProt release 2020_04)	ZNF100	Q8IYN0	no	yes	no	no	no
Whole human reviewed proteome(UniProt release 2020_04)	ZNF121	P58317	no	no	yes	no	no
Whole human reviewed proteome(UniProt release 2020_04)	ZNF517	Q6ZMY9	no	yes	no	no	no
Whole human reviewed proteome(UniProt release 2020_04)	ZNF155	Q12901	no	no	yes	no	no
Whole human reviewed proteome(UniProt release 2020_04)	ZC3H15	Q8WU90	no	no	no	no	yes
Whole human reviewed proteome(UniProt release 2020_04)	ZBED1	O96006	no	no	yes	no	no
Whole human reviewed proteome(UniProt release 2020_04)	SRGAP2C	P0DJJ0	no	no	no	no	no
Whole human reviewed proteome(UniProt release 2020_04)	SRSF2	Q01130	no	no	no	no	yes
Whole human reviewed proteome(UniProt release 2020_04)	SPTLC1	O15269	no	no	no	yes	yes
Whole human reviewed proteome(UniProt release 2020_04)	SPRR3	Q9UBC9	no	yes	no	no	no
Whole human reviewed proteome(UniProt release 2020_04)	SYCE3	A1L190	no	no	no	no	no
Whole human reviewed proteome(UniProt release 2020_04)	FARSB	Q9NSD9	no	no	no	no	yes
Whole human reviewed proteome(UniProt release 2020_04)	TEX50	A0A1B0GTY4	no	no	no	no	no
Whole human reviewed proteome(UniProt release 2020_04)	TNR	Q92752	yes	no	yes	yes	yes
Whole human reviewed proteome(UniProt release 2020_04)	SYT12	Q8IV01	no	no	no	yes	no
Whole human reviewed proteome(UniProt release 2020_04)	TANC1	Q9C0D5	no	no	yes	yes	yes
Whole human reviewed proteome(UniProt release 2020_04)	CCT5	P48643	no	no	no	no	yes
Whole human reviewed proteome(UniProt release 2020_04)	TAS2R3	Q9NYW6	no	yes	no	no	no
Whole human reviewed proteome(UniProt release 2020_04)	TM4SF20	Q53R12	no	no	no	yes	no
Whole human reviewed proteome(UniProt release 2020_04)	TBX15	Q96SF7	no	no	yes	yes	yes
Whole human reviewed proteome(UniProt release 2020_04)	TAF4	O00268	yes	no	yes	yes	yes
Whole human reviewed proteome(UniProt release 2020_04)	TARDBP	Q13148	no	no	no	no	yes
Whole human reviewed proteome(UniProt release 2020_04)	TIMD4	Q96H15	no	yes	no	no	no
Whole human reviewed proteome(UniProt release 2020_04)	TGS1	Q96RS0	no	no	no	no	yes
Whole human reviewed proteome(UniProt release 2020_04)	TMPRSS3	P57727	no	no	yes	no	no
Whole human reviewed proteome(UniProt release 2020_04)	TRMT1	Q9NXH9	no	yes	no	no	no
Whole human reviewed proteome(UniProt release 2020_04)	MPL	P40238	no	no	no	no	yes
Whole human reviewed proteome(UniProt release 2020_04)	TRAP1	Q12931	no	no	no	yes	no
Whole human reviewed proteome(UniProt release 2020_04)	TRDMT1	O14717	no	no	no	yes	no
Whole human reviewed proteome(UniProt release 2020_04)	TRIM32	Q13049	no	no	no	no	yes
Whole human reviewed proteome(UniProt release 2020_04)	TOX2	Q96NM4	no	no	yes	no	yes
Whole human reviewed proteome(UniProt release 2020_04)	TOP3B	O95985	no	no	no	no	yes
Whole human reviewed proteome(UniProt release 2020_04)	TRIM40	Q6P9F5	no	yes	no	no	no
Whole human reviewed proteome(UniProt release 2020_04)	TRIO	O75962	no	no	yes	no	yes
Whole human reviewed proteome(UniProt release 2020_04)	TYRP1	P17643	no	no	no	yes	no
Whole human reviewed proteome(UniProt release 2020_04)	TRIM50	Q86XT4	no	yes	no	no	no
Whole human reviewed proteome(UniProt release 2020_04)	TRIM51	Q9BSJ1	no	yes	no	no	no
Whole human reviewed proteome(UniProt release 2020_04)	TRBV28	A0A5B6	no	no	no	no	no
Whole human reviewed proteome(UniProt release 2020_04)	TRUB1	Q8WWH5	no	no	no	yes	no
Whole human reviewed proteome(UniProt release 2020_04)	TXNDC17	Q9BRA2	no	no	no	no	yes
Whole human reviewed proteome(UniProt release 2020_04)	TTC25	Q96NG3	no	no	no	no	no
Whole human reviewed proteome(UniProt release 2020_04)	TPSAB1	Q15661	no	no	yes	no	no
Whole human reviewed proteome(UniProt release 2020_04)	USP17L21	D6R901	no	no	no	no	no
Whole human reviewed proteome(UniProt release 2020_04)	TTC38	Q5R3I4	no	yes	no	no	no
Whole human reviewed proteome(UniProt release 2020_04)	TTLL12	Q14166	no	yes	no	no	no
Whole human reviewed proteome(UniProt release 2020_04)	NME8	Q8N427	no	no	no	yes	no
Whole human reviewed proteome(UniProt release 2020_04)	TRPM7	Q96QT4	no	no	yes	yes	yes
Whole human reviewed proteome(UniProt release 2020_04)	TXLNB	Q8N3L3	no	no	yes	yes	no
Whole human reviewed proteome(UniProt release 2020_04)	TYK2	P29597	no	no	yes	yes	yes
Whole human reviewed proteome(UniProt release 2020_04)	TTTY10	Q9BZA0	no	no	no	no	no
Whole human reviewed proteome(UniProt release 2020_04)	UBE2D2	P62837	no	no	yes	no	yes
Whole human reviewed proteome(UniProt release 2020_04)	UBAP1L	F5GYI3	no	no	no	no	no
Whole human reviewed proteome(UniProt release 2020_04)	UBN1	Q9NPG3	no	no	no	no	yes
Whole human reviewed proteome(UniProt release 2020_04)	UIMC1	Q96RL1	no	no	no	yes	yes
Whole human reviewed proteome(UniProt release 2020_04)	URB1-AS1	Q96HZ7	no	no	no	no	no
Whole human reviewed proteome(UniProt release 2020_04)	UGT1A1	P22309	no	yes	no	no	no
Whole human reviewed proteome(UniProt release 2020_04)	UST	Q9Y2C2	no	no	no	no	yes
Whole human reviewed proteome(UniProt release 2020_04)	UEVLD	Q8IX04	no	no	no	yes	no
Whole human reviewed proteome(UniProt release 2020_04)	USP48	Q86UV5	no	no	no	no	yes
Whole human reviewed proteome(UniProt release 2020_04)	VANGL2	Q9ULK5	yes	no	yes	yes	yes
Whole human reviewed proteome(UniProt release 2020_04)	AVPR1B	P47901	no	no	yes	no	no
Whole human reviewed proteome(UniProt release 2020_04)	XKR9	Q5GH70	no	no	yes	yes	no
Whole human reviewed proteome(UniProt release 2020_04)	WNT5B	Q9H1J7	no	no	yes	no	yes
Whole human reviewed proteome(UniProt release 2020_04)	WNT9A	O14904	no	no	yes	no	yes
Whole human reviewed proteome(UniProt release 2020_04)	WLS	Q5T9L3	no	no	no	yes	yes
Whole human reviewed proteome(UniProt release 2020_04)	WFS1	O76024	no	no	no	no	no
Whole human reviewed proteome(UniProt release 2020_04)	nan	Q6ZQT0	no	no	no	no	no
Whole human reviewed proteome(UniProt release 2020_04)	nan	A6NLC8	no	no	no	no	no
Whole human reviewed proteome(UniProt release 2020_04)	nan	Q8NA96	no	no	no	no	no
Whole human reviewed proteome(UniProt release 2020_04)	nan	Q6ZS49	no	no	no	no	no
Whole human reviewed proteome(UniProt release 2020_04)	PRO1854	Q9UHT4	no	no	no	no	no
Whole human reviewed proteome(UniProt release 2020_04)	ZNF234	Q14588	no	yes	no	no	no
Whole human reviewed proteome(UniProt release 2020_04)	SLC30A6	Q6NXT4	no	no	no	yes	no
Whole human reviewed proteome(UniProt release 2020_04)	ZNF576	Q9H609	no	yes	no	no	no
Whole human reviewed proteome(UniProt release 2020_04)	ZNHIT1	O43257	no	no	no	no	yes
Whole human reviewed proteome(UniProt release 2020_04)	ZNF85	Q03923	no	no	yes	no	no
Whole human reviewed proteome(UniProt release 2020_04)	ZNF496	Q96IT1	no	no	no	no	yes
Whole human reviewed proteome(UniProt release 2020_04)	ZNF8	P17098	no	no	no	no	no
Whole human reviewed proteome(UniProt release 2020_04)	ZFP64	Q9NTW7	no	no	no	yes	yes
Whole human reviewed proteome(UniProt release 2020_04)	nan	Q8N402	no	no	no	no	no
Whole human reviewed proteome(UniProt release 2020_04)	ZNF549	Q6P9A3	no	yes	no	no	no
Whole human reviewed proteome(UniProt release 2020_04)	ZNF575	Q86XF7	no	yes	no	no	no
Whole human reviewed proteome(UniProt release 2020_04)	ZNF286B	P0CG31	no	no	no	no	no
Whole human reviewed proteome(UniProt release 2020_04)	ZNF655	Q8N720	no	yes	no	no	no
Whole human reviewed proteome(UniProt release 2020_04)	ZFP2	Q6ZN57	no	yes	no	no	no
Whole human reviewed proteome(UniProt release 2020_04)	ZBED5	Q49AG3	no	no	no	no	no
Whole human reviewed proteome(UniProt release 2020_04)	ZFHX2	Q9C0A1	no	no	no	no	no
Whole human reviewed proteome(UniProt release 2020_04)	RPTOR	Q8N122	no	no	no	no	yes
Whole human reviewed proteome(UniProt release 2020_04)	SEC61A1	P61619	no	no	yes	no	yes
Whole human reviewed proteome(UniProt release 2020_04)	SLC26A5	P58743	no	no	yes	yes	yes
Whole human reviewed proteome(UniProt release 2020_04)	MRPS11	P82912	no	no	no	no	yes
Whole human reviewed proteome(UniProt release 2020_04)	SLC25A44	Q96H78	no	no	no	no	yes
Whole human reviewed proteome(UniProt release 2020_04)	SEC14L5	O43304	no	no	yes	yes	no
Whole human reviewed proteome(UniProt release 2020_04)	SLC38A2	Q96QD8	no	no	yes	no	yes
Whole human reviewed proteome(UniProt release 2020_04)	SLC36A1	Q7Z2H8	no	no	yes	yes	no
Whole human reviewed proteome(UniProt release 2020_04)	SLC35G5	Q96KT7	no	yes	no	no	no
Whole human reviewed proteome(UniProt release 2020_04)	SAA2	P0DJI9	no	yes	no	no	no
Whole human reviewed proteome(UniProt release 2020_04)	SLC19A3	Q9BZV2	no	no	yes	yes	no
Whole human reviewed proteome(UniProt release 2020_04)	MRPS23	Q9Y3D9	no	yes	no	no	no
Whole human reviewed proteome(UniProt release 2020_04)	SLC46A3	Q7Z3Q1	no	no	yes	yes	no
Whole human reviewed proteome(UniProt release 2020_04)	RTTN	Q86VV8	no	yes	no	no	no
Whole human reviewed proteome(UniProt release 2020_04)	SPATA31A1	Q5TZJ5	no	no	no	no	no
Whole human reviewed proteome(UniProt release 2020_04)	S100A8	P05109	no	yes	no	no	no
Whole human reviewed proteome(UniProt release 2020_04)	SCAF8	Q9UPN6	no	no	no	yes	yes
Whole human reviewed proteome(UniProt release 2020_04)	SLC6A8	P48029	no	no	no	no	yes
Whole human reviewed proteome(UniProt release 2020_04)	SMIM10L2A	P0DMW4	no	no	no	no	no
Whole human reviewed proteome(UniProt release 2020_04)	FAP	Q12884	no	no	yes	yes	yes
Whole human reviewed proteome(UniProt release 2020_04)	SEMA6D	Q8NFY4	yes	no	yes	yes	yes
Whole human reviewed proteome(UniProt release 2020_04)	ST6GALNAC6	Q969X2	no	no	no	yes	no
Whole human reviewed proteome(UniProt release 2020_04)	SF3B4	Q15427	no	no	no	yes	yes
Whole human reviewed proteome(UniProt release 2020_04)	SELENOM	Q8WWX9	no	yes	no	no	no
Whole human reviewed proteome(UniProt release 2020_04)	SMAD3	P84022	no	no	yes	no	yes
Whole human reviewed proteome(UniProt release 2020_04)	SRPRA	P08240	no	no	no	yes	yes
Whole human reviewed proteome(UniProt release 2020_04)	SPINT1	O43278	no	no	yes	no	no
Whole human reviewed proteome(UniProt release 2020_04)	SNX25	Q9H3E2	no	no	no	yes	no
Whole human reviewed proteome(UniProt release 2020_04)	SPIDR	Q14159	no	yes	no	no	no
Whole human reviewed proteome(UniProt release 2020_04)	SPPL2A	Q8TCT8	no	no	yes	no	no
Whole human reviewed proteome(UniProt release 2020_04)	SLC9C2	Q5TAH2	no	yes	no	no	no
Whole human reviewed proteome(UniProt release 2020_04)	SPSB4	Q96A44	no	no	yes	no	yes
Whole human reviewed proteome(UniProt release 2020_04)	SNTA1	Q13424	no	no	yes	yes	yes
Whole human reviewed proteome(UniProt release 2020_04)	STX17	P56962	no	no	no	yes	yes
Whole human reviewed proteome(UniProt release 2020_04)	SWI5	Q1ZZU3	no	yes	no	no	no
Whole human reviewed proteome(UniProt release 2020_04)	STARD10	Q9Y365	no	yes	no	no	no
Whole human reviewed proteome(UniProt release 2020_04)	STEAP3	Q658P3	no	no	no	yes	no
Whole human reviewed proteome(UniProt release 2020_04)	STRCP1	A6NGW2	no	no	no	no	no
Whole human reviewed proteome(UniProt release 2020_04)	STK26	Q9P289	no	no	yes	yes	no
Whole human reviewed proteome(UniProt release 2020_04)	EPRS1	P07814	no	no	no	yes	no
Whole human reviewed proteome(UniProt release 2020_04)	TAPBP	O15533	no	yes	no	yes	no
Whole human reviewed proteome(UniProt release 2020_04)	TRIM36	Q9NQ86	no	no	yes	yes	yes
Whole human reviewed proteome(UniProt release 2020_04)	TPRG1L	Q5T0D9	no	no	yes	no	no
Whole human reviewed proteome(UniProt release 2020_04)	TRGV9	Q99603	no	no	no	no	no
Whole human reviewed proteome(UniProt release 2020_04)	TSPAN11	A1L157	no	no	yes	no	no
Whole human reviewed proteome(UniProt release 2020_04)	TTC34	A8MYJ7	no	no	no	no	no
Whole human reviewed proteome(UniProt release 2020_04)	TSSK2	Q96PF2	no	yes	no	no	no
Whole human reviewed proteome(UniProt release 2020_04)	TYW1	Q9NV66	no	no	no	yes	no
Whole human reviewed proteome(UniProt release 2020_04)	UBALD1	Q8TB05	no	no	no	no	no
Whole human reviewed proteome(UniProt release 2020_04)	TXNDC8	Q6A555	no	no	no	no	no
Whole human reviewed proteome(UniProt release 2020_04)	TSHZ1	Q6ZSZ6	no	no	yes	no	yes
Whole human reviewed proteome(UniProt release 2020_04)	TRPV1	Q8NER1	no	no	yes	yes	no
Whole human reviewed proteome(UniProt release 2020_04)	TRPV2	Q9Y5S1	no	no	yes	yes	no
Whole human reviewed proteome(UniProt release 2020_04)	UBE2C	O00762	no	no	no	no	yes
Whole human reviewed proteome(UniProt release 2020_04)	TRPT1	Q86TN4	no	no	no	yes	no
Whole human reviewed proteome(UniProt release 2020_04)	TRBV6-6	A0A0A6YYG2	no	no	no	no	no
Whole human reviewed proteome(UniProt release 2020_04)	PLAU	P00749	no	no	yes	yes	yes
Whole human reviewed proteome(UniProt release 2020_04)	UHRF2	Q96PU4	no	no	yes	no	yes
Whole human reviewed proteome(UniProt release 2020_04)	UGT1A6	P19224	no	no	yes	no	no
Whole human reviewed proteome(UniProt release 2020_04)	UBXN2B	Q14CS0	no	no	yes	no	yes
Whole human reviewed proteome(UniProt release 2020_04)	USF3	Q68DE3	no	no	no	yes	yes
Whole human reviewed proteome(UniProt release 2020_04)	UBE2H	P62256	no	no	no	no	yes
Whole human reviewed proteome(UniProt release 2020_04)	USP29	Q9HBJ7	no	yes	no	no	no
Whole human reviewed proteome(UniProt release 2020_04)	USP5	P45974	no	no	yes	yes	yes
Whole human reviewed proteome(UniProt release 2020_04)	USP37	Q86T82	no	no	no	yes	yes
Whole human reviewed proteome(UniProt release 2020_04)	VPS54	Q9P1Q0	no	no	no	no	yes
Whole human reviewed proteome(UniProt release 2020_04)	VHL	P40337	no	no	no	no	yes
Whole human reviewed proteome(UniProt release 2020_04)	VAPB	O95292	no	no	yes	yes	yes
Whole human reviewed proteome(UniProt release 2020_04)	ATP6V0E1	O15342	no	no	no	yes	yes
Whole human reviewed proteome(UniProt release 2020_04)	VWC2L	B2RUY7	no	no	no	yes	yes
Whole human reviewed proteome(UniProt release 2020_04)	SLC7A11	Q9UPY5	no	no	yes	no	no
Whole human reviewed proteome(UniProt release 2020_04)	WDR19	Q8NEZ3	no	no	no	yes	no
Whole human reviewed proteome(UniProt release 2020_04)	WDR17	Q8IZU2	no	yes	no	no	no
Whole human reviewed proteome(UniProt release 2020_04)	WDR46	O15213	no	yes	no	no	no
Whole human reviewed proteome(UniProt release 2020_04)	WBP2NL	Q6ICG8	no	no	yes	yes	no
Whole human reviewed proteome(UniProt release 2020_04)	WDR74	Q6RFH5	no	no	no	no	yes
Whole human reviewed proteome(UniProt release 2020_04)	WNT5A	P41221	yes	no	yes	yes	yes
Whole human reviewed proteome(UniProt release 2020_04)	WFDC10A	Q9H1F0	no	no	no	yes	no
Whole human reviewed proteome(UniProt release 2020_04)	WNT10B	O00744	no	no	yes	no	yes
Whole human reviewed proteome(UniProt release 2020_04)	VSIG1	Q86XK7	no	no	yes	no	no
Whole human reviewed proteome(UniProt release 2020_04)	nan	Q1RN00	no	no	no	no	no
Whole human reviewed proteome(UniProt release 2020_04)	FP248	Q71RG6	no	no	no	no	no
Whole human reviewed proteome(UniProt release 2020_04)	nan	Q8N1X5	no	no	no	no	no
Whole human reviewed proteome(UniProt release 2020_04)	nan	A6NDX4	no	no	no	no	no
Whole human reviewed proteome(UniProt release 2020_04)	nan	Q499Y3	no	no	no	no	no
Whole human reviewed proteome(UniProt release 2020_04)	ZSWIM4	Q9H7M6	no	no	yes	no	yes
Whole human reviewed proteome(UniProt release 2020_04)	ZNF79	Q15937	no	yes	no	no	no
Whole human reviewed proteome(UniProt release 2020_04)	ZC3H11B	A0A1B0GTU1	no	no	no	no	no
Whole human reviewed proteome(UniProt release 2020_04)	ZNF548	Q8NEK5	no	yes	no	no	no
Whole human reviewed proteome(UniProt release 2020_04)	ZMYND10	O75800	no	no	no	yes	no
Whole human reviewed proteome(UniProt release 2020_04)	ZNF99	A8MXY4	no	yes	no	no	no
Whole human reviewed proteome(UniProt release 2020_04)	ZNF687	Q8N1G0	yes	no	yes	yes	yes
Whole human reviewed proteome(UniProt release 2020_04)	ZFP62	Q8NB50	no	yes	no	no	no
Whole human reviewed proteome(UniProt release 2020_04)	ZNF783	Q6ZMS7	no	yes	no	no	no
Whole human reviewed proteome(UniProt release 2020_04)	SMU1	Q2TAY7	no	no	no	no	yes
Whole human reviewed proteome(UniProt release 2020_04)	SLC9A7	Q96T83	no	no	yes	yes	yes
Whole human reviewed proteome(UniProt release 2020_04)	SRRM5	B3KS81	no	yes	no	no	no
Whole human reviewed proteome(UniProt release 2020_04)	SOHLH2	Q9NX45	no	yes	no	no	no
Whole human reviewed proteome(UniProt release 2020_04)	SNAPC2	Q13487	no	no	no	no	yes
Whole human reviewed proteome(UniProt release 2020_04)	SMARCB1	Q12824	no	no	no	yes	yes
Whole human reviewed proteome(UniProt release 2020_04)	SVBP	Q8N300	no	yes	no	no	no
Whole human reviewed proteome(UniProt release 2020_04)	STATH	P02808	no	yes	no	no	no
Whole human reviewed proteome(UniProt release 2020_04)	SUPV3L1	Q8IYB8	no	no	no	yes	yes
Whole human reviewed proteome(UniProt release 2020_04)	STX2	P32856	no	no	yes	yes	yes
Whole human reviewed proteome(UniProt release 2020_04)	SYBU	Q9NX95	no	no	no	yes	yes
Whole human reviewed proteome(UniProt release 2020_04)	SULT1A1	P50225	no	yes	no	no	no
Whole human reviewed proteome(UniProt release 2020_04)	STX7	O15400	no	no	yes	no	yes
Whole human reviewed proteome(UniProt release 2020_04)	SUCLG2	Q96I99	no	yes	no	no	no
Whole human reviewed proteome(UniProt release 2020_04)	TRAPPC3	O43617	no	no	yes	yes	no
Whole human reviewed proteome(UniProt release 2020_04)	TPTE2	Q6XPS3	no	yes	no	no	no
Whole human reviewed proteome(UniProt release 2020_04)	TARBP2	Q15633	no	no	yes	yes	yes
Whole human reviewed proteome(UniProt release 2020_04)	TRAPPC9	Q96Q05	no	no	no	no	yes
Whole human reviewed proteome(UniProt release 2020_04)	TPR	P12270	no	no	no	no	yes
Whole human reviewed proteome(UniProt release 2020_04)	TRIM59	Q8IWR1	no	no	yes	no	no
Whole human reviewed proteome(UniProt release 2020_04)	TRIP11	Q15643	no	no	no	yes	yes
Whole human reviewed proteome(UniProt release 2020_04)	TRIM63	Q969Q1	no	no	yes	yes	yes
Whole human reviewed proteome(UniProt release 2020_04)	TRIM64	A6NGJ6	no	no	no	no	no
Whole human reviewed proteome(UniProt release 2020_04)	TRIM69	Q86WT6	no	no	yes	yes	no
Whole human reviewed proteome(UniProt release 2020_04)	TULP1	O00294	no	no	yes	no	yes
Whole human reviewed proteome(UniProt release 2020_04)	TRAV41	A0A0B4J266	no	no	no	no	no
Whole human reviewed proteome(UniProt release 2020_04)	TRBV20-1	A0A075B6N2	no	no	no	no	no
Whole human reviewed proteome(UniProt release 2020_04)	TUT7	Q5VYS8	yes	no	yes	yes	yes
Whole human reviewed proteome(UniProt release 2020_04)	TRERF1	Q96PN7	yes	no	yes	yes	yes
Whole human reviewed proteome(UniProt release 2020_04)	TRIM52	Q96A61	no	yes	no	no	no
Whole human reviewed proteome(UniProt release 2020_04)	TRBV7-2	A0A1B0GXF2	no	no	no	no	no
Whole human reviewed proteome(UniProt release 2020_04)	TRBV6-3	P0DPF7	no	no	no	no	no
Whole human reviewed proteome(UniProt release 2020_04)	TRIML2	Q8N7C3	no	yes	no	no	no
Whole human reviewed proteome(UniProt release 2020_04)	PUS1	Q9Y606	no	no	no	yes	yes
Whole human reviewed proteome(UniProt release 2020_04)	TRBV10-1	A0A0K0K1A3	no	no	no	no	no
Whole human reviewed proteome(UniProt release 2020_04)	TRBV7-8	A0A1B0GX51	no	no	no	no	no
Whole human reviewed proteome(UniProt release 2020_04)	TSPEAR-AS2	P59090	no	no	no	no	no
Whole human reviewed proteome(UniProt release 2020_04)	USP17L2	Q6R6M4	no	yes	no	no	no
Whole human reviewed proteome(UniProt release 2020_04)	USP17L3	A6NCW0	no	no	no	no	no
Whole human reviewed proteome(UniProt release 2020_04)	TTC14	Q96N46	no	no	no	yes	yes
Whole human reviewed proteome(UniProt release 2020_04)	TSPAN8	P19075	no	yes	no	no	no
Whole human reviewed proteome(UniProt release 2020_04)	TTC31	Q49AM3	no	yes	no	no	no
Whole human reviewed proteome(UniProt release 2020_04)	TTC6	Q86TZ1	no	yes	no	no	no
Whole human reviewed proteome(UniProt release 2020_04)	TYMSOS	Q8TAI1	no	no	no	no	no
Whole human reviewed proteome(UniProt release 2020_04)	TTC28	Q96AY4	no	no	no	yes	no
Whole human reviewed proteome(UniProt release 2020_04)	TSPY2	A6NKD2	no	no	no	no	no
Whole human reviewed proteome(UniProt release 2020_04)	UBAP2	Q5T6F2	no	no	yes	yes	yes
Whole human reviewed proteome(UniProt release 2020_04)	UBC	P0CG48	no	no	yes	no	yes
Whole human reviewed proteome(UniProt release 2020_04)	FERMT3	Q86UX7	no	no	yes	no	yes
Whole human reviewed proteome(UniProt release 2020_04)	UQCC3	Q6UW78	no	yes	no	no	no
Whole human reviewed proteome(UniProt release 2020_04)	UQCC1	Q9NVA1	no	yes	no	no	no
Whole human reviewed proteome(UniProt release 2020_04)	USB1	Q9BQ65	no	yes	no	no	no
Whole human reviewed proteome(UniProt release 2020_04)	UNC13D	Q70J99	no	no	yes	yes	no
Whole human reviewed proteome(UniProt release 2020_04)	UCN	P55089	no	no	no	no	no
Whole human reviewed proteome(UniProt release 2020_04)	UFD1	Q92890	no	no	no	no	yes
Whole human reviewed proteome(UniProt release 2020_04)	UBASH3A	P57075	no	no	yes	yes	yes
Whole human reviewed proteome(UniProt release 2020_04)	ATP6V0A4	Q9HBG4	no	no	yes	yes	yes
Whole human reviewed proteome(UniProt release 2020_04)	USP4	Q13107	no	no	yes	yes	yes
Whole human reviewed proteome(UniProt release 2020_04)	USP27X	A6NNY8	no	no	no	no	no
Whole human reviewed proteome(UniProt release 2020_04)	TCIRG1	Q13488	no	no	yes	no	no
Whole human reviewed proteome(UniProt release 2020_04)	USP53	Q70EK8	no	no	yes	yes	no
Whole human reviewed proteome(UniProt release 2020_04)	VGLL3	A8MV65	no	no	yes	yes	no
Whole human reviewed proteome(UniProt release 2020_04)	VDAC2	P45880	no	no	yes	no	yes
Whole human reviewed proteome(UniProt release 2020_04)	WDR83	Q9BRX9	no	no	no	yes	no
Whole human reviewed proteome(UniProt release 2020_04)	CX3CL1	P78423	no	no	no	yes	yes
Whole human reviewed proteome(UniProt release 2020_04)	VWF	P04275	no	no	yes	yes	yes
Whole human reviewed proteome(UniProt release 2020_04)	WDFY4	Q6ZS81	no	no	yes	no	no
Whole human reviewed proteome(UniProt release 2020_04)	XRCC4	Q13426	no	no	no	yes	yes
Whole human reviewed proteome(UniProt release 2020_04)	XKR8	Q9H6D3	no	no	yes	yes	no
Whole human reviewed proteome(UniProt release 2020_04)	XKR6	Q5GH73	no	no	yes	no	yes
Whole human reviewed proteome(UniProt release 2020_04)	WASH3P	C4AMC7	no	no	no	no	no
Whole human reviewed proteome(UniProt release 2020_04)	WDFY2	Q96P53	no	no	yes	no	yes
Whole human reviewed proteome(UniProt release 2020_04)	WFDC11	Q8NEX6	no	yes	no	no	no
Whole human reviewed proteome(UniProt release 2020_04)	VSIG10L2	P0DP72	no	no	no	no	no
Whole human reviewed proteome(UniProt release 2020_04)	WDR82	Q6UXN9	no	no	no	no	yes
Whole human reviewed proteome(UniProt release 2020_04)	WIZ	O95785	no	no	no	yes	yes
Whole human reviewed proteome(UniProt release 2020_04)	nan	Q6ZRP5	no	no	no	no	no
Whole human reviewed proteome(UniProt release 2020_04)	nan	Q9UF83	no	no	no	no	no
Whole human reviewed proteome(UniProt release 2020_04)	UNQ5815/PRO19632	Q6UWF5	no	no	no	no	no
Whole human reviewed proteome(UniProt release 2020_04)	UNQ6190/PRO20217	Q6UXQ8	no	no	no	no	no
Whole human reviewed proteome(UniProt release 2020_04)	nan	Q8N377	no	no	no	no	no
Whole human reviewed proteome(UniProt release 2020_04)	ZNRF1	Q8ND25	no	no	no	no	no
Whole human reviewed proteome(UniProt release 2020_04)	ZNF347	Q96SE7	no	no	yes	no	no
Whole human reviewed proteome(UniProt release 2020_04)	ZNF350	Q9GZX5	no	yes	no	no	no
Whole human reviewed proteome(UniProt release 2020_04)	ZNF414	Q96IQ9	no	yes	no	no	no
Whole human reviewed proteome(UniProt release 2020_04)	ZNF713	Q8N859	no	yes	no	no	no
Whole human reviewed proteome(UniProt release 2020_04)	ZNF418	Q8TF45	no	no	yes	no	no
Whole human reviewed proteome(UniProt release 2020_04)	ZNF468	Q5VIY5	no	yes	no	no	no
Whole human reviewed proteome(UniProt release 2020_04)	ZNF835	Q9Y2P0	no	yes	no	no	no
Whole human reviewed proteome(UniProt release 2020_04)	ZNF491	Q8N8L2	no	yes	no	no	no
Whole human reviewed proteome(UniProt release 2020_04)	ZNF439	Q8NDP4	no	yes	no	no	no
Whole human reviewed proteome(UniProt release 2020_04)	ZKSCAN3	Q9BRR0	no	yes	no	no	no
Whole human reviewed proteome(UniProt release 2020_04)	ZNF57	Q68EA5	no	yes	no	no	no
Whole human reviewed proteome(UniProt release 2020_04)	ZNF577	Q9BSK1	no	no	yes	no	no
Whole human reviewed proteome(UniProt release 2020_04)	ZMAT1	Q5H9K5	no	no	yes	no	no
Whole human reviewed proteome(UniProt release 2020_04)	ZNF629	Q9UEG4	yes	no	yes	yes	yes
Whole human reviewed proteome(UniProt release 2020_04)	ZNF117	Q03924	no	no	yes	no	no
Whole human reviewed proteome(UniProt release 2020_04)	ZNF660	Q6AZW8	no	no	yes	no	no
Whole human reviewed proteome(UniProt release 2020_04)	ZDHHC16	Q969W1	no	yes	no	no	no
Whole human reviewed proteome(UniProt release 2020_04)	ZNF624	Q9P2J8	no	no	yes	no	no
Whole human reviewed proteome(UniProt release 2020_04)	RPS13	P62277	no	no	no	no	yes
Whole human reviewed proteome(UniProt release 2020_04)	POLR1G	O15446	no	no	no	yes	no
Whole human reviewed proteome(UniProt release 2020_04)	RRP7BP	Q9NSQ0	no	no	no	no	no
Whole human reviewed proteome(UniProt release 2020_04)	SAPCD2	Q86UD0	no	yes	no	no	no
Whole human reviewed proteome(UniProt release 2020_04)	SLC26A2	P50443	no	no	yes	no	no
Whole human reviewed proteome(UniProt release 2020_04)	MRPS14	O60783	no	no	no	no	yes
Whole human reviewed proteome(UniProt release 2020_04)	SLC5A1	P13866	no	no	yes	yes	yes
Whole human reviewed proteome(UniProt release 2020_04)	MRPS18C	Q9Y3D5	no	yes	no	no	no
Whole human reviewed proteome(UniProt release 2020_04)	SLC6A17	Q9H1V8	no	no	yes	no	yes
Whole human reviewed proteome(UniProt release 2020_04)	SLC35G3	Q8N808	no	yes	no	no	no
Whole human reviewed proteome(UniProt release 2020_04)	SLC35A4	L0R6Q1	no	yes	no	no	no
Whole human reviewed proteome(UniProt release 2020_04)	MRPS22	P82650	no	yes	no	no	no
Whole human reviewed proteome(UniProt release 2020_04)	RYR3	Q15413	no	no	yes	no	no
Whole human reviewed proteome(UniProt release 2020_04)	SLC13A5	Q86YT5	no	no	yes	no	yes
Whole human reviewed proteome(UniProt release 2020_04)	SLC39A10	Q9ULF5	no	no	yes	no	yes
Whole human reviewed proteome(UniProt release 2020_04)	SIAH2	O43255	no	no	no	no	yes
Whole human reviewed proteome(UniProt release 2020_04)	SOX30	O94993	no	no	no	yes	yes
Whole human reviewed proteome(UniProt release 2020_04)	SPATS2L	Q9NUQ6	yes	no	yes	yes	yes
Whole human reviewed proteome(UniProt release 2020_04)	NUGGC	Q68CJ6	no	no	no	yes	no
Whole human reviewed proteome(UniProt release 2020_04)	SPATA16	Q9BXB7	no	yes	no	no	no
Whole human reviewed proteome(UniProt release 2020_04)	SPRED1	Q7Z699	no	no	yes	yes	yes
Whole human reviewed proteome(UniProt release 2020_04)	SUSD2	Q9UGT4	no	yes	no	no	no
Whole human reviewed proteome(UniProt release 2020_04)	SSX4	O60224	no	yes	no	no	no
Whole human reviewed proteome(UniProt release 2020_04)	STXBP2	Q15833	no	no	yes	no	no
Whole human reviewed proteome(UniProt release 2020_04)	STOML1	Q9UBI4	no	no	no	yes	no
Whole human reviewed proteome(UniProt release 2020_04)	UBXN6	Q9BZV1	no	no	no	no	yes
Whole human reviewed proteome(UniProt release 2020_04)	UTP20	O75691	no	no	no	yes	yes
Whole human reviewed proteome(UniProt release 2020_04)	USH2A	O75445	no	no	no	no	yes
Whole human reviewed proteome(UniProt release 2020_04)	VSIR	Q9H7M9	no	no	no	yes	no
Whole human reviewed proteome(UniProt release 2020_04)	UQCRFS1P1	P0C7P4	no	no	no	no	no
Whole human reviewed proteome(UniProt release 2020_04)	USP36	Q9P275	no	no	yes	yes	yes
Whole human reviewed proteome(UniProt release 2020_04)	VPS37C	A5D8V6	no	no	yes	no	yes
Whole human reviewed proteome(UniProt release 2020_04)	VPS37B	Q9H9H4	no	no	yes	no	yes
Whole human reviewed proteome(UniProt release 2020_04)	WWOX	Q9NZC7	no	no	no	no	yes
Whole human reviewed proteome(UniProt release 2020_04)	WDR92	Q96MX6	no	no	no	no	no
Whole human reviewed proteome(UniProt release 2020_04)	XBP1	P17861	no	no	no	no	yes
Whole human reviewed proteome(UniProt release 2020_04)	WDR41	Q9HAD4	no	no	no	yes	no
Whole human reviewed proteome(UniProt release 2020_04)	XKRY2	A2RUG3	no	no	no	no	no
Whole human reviewed proteome(UniProt release 2020_04)	WFDC3	Q8IUB2	no	yes	no	no	no
Whole human reviewed proteome(UniProt release 2020_04)	VSIG10L	Q86VR7	no	no	no	no	no
Whole human reviewed proteome(UniProt release 2020_04)	WNT9B	O14905	no	no	yes	yes	yes
Whole human reviewed proteome(UniProt release 2020_04)	LINC01356	Q8N9X3	no	no	no	no	no
Whole human reviewed proteome(UniProt release 2020_04)	nan	Q96M66	no	no	no	no	no
Whole human reviewed proteome(UniProt release 2020_04)	ZNF213	O14771	no	yes	no	no	no
Whole human reviewed proteome(UniProt release 2020_04)	ZNF235	Q14590	no	no	yes	no	no
Whole human reviewed proteome(UniProt release 2020_04)	ZNF212	Q9UDV6	no	yes	no	no	no
Whole human reviewed proteome(UniProt release 2020_04)	ZNF281	Q9Y2X9	no	no	yes	no	yes
Whole human reviewed proteome(UniProt release 2020_04)	ZNF383	Q8NA42	no	no	yes	no	no
Whole human reviewed proteome(UniProt release 2020_04)	ZNF704	Q6ZNC4	yes	no	yes	yes	yes
Whole human reviewed proteome(UniProt release 2020_04)	ZNF772	Q68DY9	no	no	yes	no	no
Whole human reviewed proteome(UniProt release 2020_04)	ZNF404	Q494X3	no	yes	no	no	no
Whole human reviewed proteome(UniProt release 2020_04)	ZNF470	Q6ECI4	no	no	yes	no	no
Whole human reviewed proteome(UniProt release 2020_04)	ZNF431	Q8TF32	no	yes	no	no	no
Whole human reviewed proteome(UniProt release 2020_04)	ZNF790	Q6PG37	no	yes	no	no	no
Whole human reviewed proteome(UniProt release 2020_04)	ZNF534	Q76KX8	no	yes	no	no	no
Whole human reviewed proteome(UniProt release 2020_04)	ZNF830	Q96NB3	no	no	no	no	yes
Whole human reviewed proteome(UniProt release 2020_04)	ZNF507	Q8TCN5	no	no	no	no	yes
Whole human reviewed proteome(UniProt release 2020_04)	ZNF726P1	Q15940	no	no	no	no	no
Whole human reviewed proteome(UniProt release 2020_04)	ZSCAN32	Q9NX65	no	no	yes	no	no
Whole human reviewed proteome(UniProt release 2020_04)	ZSCAN12	O43309	no	no	yes	yes	no
Whole human reviewed proteome(UniProt release 2020_04)	ZNF30	P17039	no	no	yes	no	no
Whole human reviewed proteome(UniProt release 2020_04)	nan	Q96M85	no	no	no	no	no
Whole human reviewed proteome(UniProt release 2020_04)	ZBTB7A	O95365	no	no	yes	no	no
Whole human reviewed proteome(UniProt release 2020_04)	ZNF473	Q8WTR7	no	no	yes	no	no
Whole human reviewed proteome(UniProt release 2020_04)	ZNF678	Q5SXM1	no	yes	no	no	no
Whole human reviewed proteome(UniProt release 2020_04)	ZC3H7B	Q9UGR2	no	no	yes	no	yes
Whole human reviewed proteome(UniProt release 2020_04)	NAPA	P54920	no	no	no	yes	yes
Whole human reviewed proteome(UniProt release 2020_04)	SREK1IP1	Q8N9Q2	no	no	no	no	no
Whole human reviewed proteome(UniProt release 2020_04)	SUSD4	Q5VX71	no	yes	no	no	no
Whole human reviewed proteome(UniProt release 2020_04)	SUN2	Q9UH99	no	no	yes	no	no
Whole human reviewed proteome(UniProt release 2020_04)	STRIP2	Q9ULQ0	no	no	yes	yes	yes
Whole human reviewed proteome(UniProt release 2020_04)	STK24	Q9Y6E0	no	no	yes	yes	yes
Whole human reviewed proteome(UniProt release 2020_04)	PARS2	Q7L3T8	no	no	no	no	yes
Whole human reviewed proteome(UniProt release 2020_04)	STEAP2	Q8NFT2	no	yes	no	no	no
Whole human reviewed proteome(UniProt release 2020_04)	TATDN2	Q93075	no	yes	no	no	no
Whole human reviewed proteome(UniProt release 2020_04)	TUBA3E	Q6PEY2	no	yes	no	no	no
Whole human reviewed proteome(UniProt release 2020_04)	SYNJ2	O15056	no	no	yes	no	yes
Whole human reviewed proteome(UniProt release 2020_04)	TAS2R60	P59551	no	yes	no	no	no
Whole human reviewed proteome(UniProt release 2020_04)	TBC1D20	Q96BZ9	no	no	no	yes	yes
Whole human reviewed proteome(UniProt release 2020_04)	TCEA1	P23193	no	no	yes	no	yes
Whole human reviewed proteome(UniProt release 2020_04)	TMEM200C	A6NKL6	no	no	no	no	no
Whole human reviewed proteome(UniProt release 2020_04)	TCERG1L	Q5VWI1	no	yes	no	no	no
Whole human reviewed proteome(UniProt release 2020_04)	TEX14	Q8IWB6	no	yes	no	no	no
Whole human reviewed proteome(UniProt release 2020_04)	TBC1D31	Q96DN5	no	yes	no	no	no
Whole human reviewed proteome(UniProt release 2020_04)	TMEM150C	B9EJG8	no	yes	no	no	no
Whole human reviewed proteome(UniProt release 2020_04)	TCL1B	O95988	no	yes	no	no	no
Whole human reviewed proteome(UniProt release 2020_04)	TBX20	Q9UMR3	no	no	yes	yes	yes
Whole human reviewed proteome(UniProt release 2020_04)	TIMM17A	Q99595	no	no	no	no	yes
Whole human reviewed proteome(UniProt release 2020_04)	TLDC2	A0PJX2	no	yes	no	no	no
Whole human reviewed proteome(UniProt release 2020_04)	TLN2	Q9Y4G6	no	no	yes	no	yes
Whole human reviewed proteome(UniProt release 2020_04)	TLN1	Q9Y490	yes	no	yes	yes	yes
Whole human reviewed proteome(UniProt release 2020_04)	TNFRSF9	Q07011	no	no	no	yes	no
Whole human reviewed proteome(UniProt release 2020_04)	TMEM189	A5PLL7	no	no	no	no	yes
Whole human reviewed proteome(UniProt release 2020_04)	TGFB2	P61812	yes	no	yes	yes	yes
Whole human reviewed proteome(UniProt release 2020_04)	TIPIN	Q9BVW5	no	no	no	no	yes
Whole human reviewed proteome(UniProt release 2020_04)	TGM3	Q08188	no	no	yes	no	no
Whole human reviewed proteome(UniProt release 2020_04)	TKFC	Q3LXA3	no	no	no	yes	no
Whole human reviewed proteome(UniProt release 2020_04)	TMEM207	Q6UWW9	no	yes	no	no	no
Whole human reviewed proteome(UniProt release 2020_04)	TMEM14C	Q9P0S9	no	no	yes	no	no
Whole human reviewed proteome(UniProt release 2020_04)	TNIP1	Q15025	yes	no	yes	yes	yes
Whole human reviewed proteome(UniProt release 2020_04)	TNFSF4	P23510	no	yes	no	no	no
Whole human reviewed proteome(UniProt release 2020_04)	TNIP3	Q96KP6	no	no	yes	no	no
Whole human reviewed proteome(UniProt release 2020_04)	TMCO4	Q5TGY1	no	no	no	yes	no
Whole human reviewed proteome(UniProt release 2020_04)	TPD52L3	Q96J77	no	no	yes	no	no
Whole human reviewed proteome(UniProt release 2020_04)	TRIB1	Q96RU8	no	no	yes	yes	no
Whole human reviewed proteome(UniProt release 2020_04)	TOP3A	Q13472	no	no	no	no	yes
Whole human reviewed proteome(UniProt release 2020_04)	TRIM4	Q9C037	no	no	yes	no	no
Whole human reviewed proteome(UniProt release 2020_04)	TRGV2	A0A075B6R0	no	no	no	no	no
Whole human reviewed proteome(UniProt release 2020_04)	TRHR	P34981	no	no	no	yes	no
Whole human reviewed proteome(UniProt release 2020_04)	TEX13A	Q9BXU3	no	yes	no	no	no
Whole human reviewed proteome(UniProt release 2020_04)	TTC17	Q96AE7	no	no	no	yes	yes
Whole human reviewed proteome(UniProt release 2020_04)	TRBV5-8	A0A5A2	no	no	no	no	no
Whole human reviewed proteome(UniProt release 2020_04)	TUSC3	Q13454	no	no	yes	yes	no
Whole human reviewed proteome(UniProt release 2020_04)	TSPEAR	Q8WU66	no	no	no	yes	no
Whole human reviewed proteome(UniProt release 2020_04)	TSTD1	Q8NFU3	no	no	no	no	no
Whole human reviewed proteome(UniProt release 2020_04)	TTC33	Q6PID6	no	no	no	yes	no
Whole human reviewed proteome(UniProt release 2020_04)	UBA7	P41226	no	no	no	yes	no
Whole human reviewed proteome(UniProt release 2020_04)	TSPY26P	Q9H489	no	no	no	no	no
Whole human reviewed proteome(UniProt release 2020_04)	TSHB	P01222	no	no	no	yes	no
Whole human reviewed proteome(UniProt release 2020_04)	TTLL2	Q9BWV7	no	yes	no	no	no
Whole human reviewed proteome(UniProt release 2020_04)	UBE2Q2	Q8WVN8	no	no	yes	no	no
Whole human reviewed proteome(UniProt release 2020_04)	UAP1L1	Q3KQV9	no	no	yes	no	no
Whole human reviewed proteome(UniProt release 2020_04)	USP18	Q9UMW8	no	no	no	yes	yes
Whole human reviewed proteome(UniProt release 2020_04)	USP1	O94782	no	no	no	yes	yes
Whole human reviewed proteome(UniProt release 2020_04)	SLC14A2	Q15849	no	no	no	yes	no
Whole human reviewed proteome(UniProt release 2020_04)	UGT1A7	Q9HAW7	no	yes	no	no	no
Whole human reviewed proteome(UniProt release 2020_04)	UGT2A3	Q6UWM9	no	no	yes	no	no
Whole human reviewed proteome(UniProt release 2020_04)	UBE4B	O95155	no	no	no	yes	yes
Whole human reviewed proteome(UniProt release 2020_04)	UBQLN3	Q9H347	no	no	no	yes	no
Whole human reviewed proteome(UniProt release 2020_04)	USP22	Q9UPT9	no	no	yes	no	yes
Whole human reviewed proteome(UniProt release 2020_04)	UBAP2L	Q14157	no	no	yes	no	yes
Whole human reviewed proteome(UniProt release 2020_04)	VPS39	Q96JC1	no	no	no	yes	yes
Whole human reviewed proteome(UniProt release 2020_04)	VPS37A	Q8NEZ2	no	no	no	no	yes
Whole human reviewed proteome(UniProt release 2020_04)	PPIP5K2	O43314	no	no	yes	no	yes
Whole human reviewed proteome(UniProt release 2020_04)	ATP6V1FNB	A0A1B0GUX0	no	no	no	no	no
Whole human reviewed proteome(UniProt release 2020_04)	AVPR2	P30518	no	no	yes	yes	no
Whole human reviewed proteome(UniProt release 2020_04)	ATP6V0E2	Q8NHE4	no	yes	no	no	no
Whole human reviewed proteome(UniProt release 2020_04)	WDTC1	Q8N5D0	no	no	no	no	yes
Whole human reviewed proteome(UniProt release 2020_04)	ATP6V1F	Q16864	no	no	no	no	no
Whole human reviewed proteome(UniProt release 2020_04)	XCL1	P47992	no	yes	no	no	no
Whole human reviewed proteome(UniProt release 2020_04)	WDR12	Q9GZL7	no	no	no	no	yes
Whole human reviewed proteome(UniProt release 2020_04)	WDR38	Q5JTN6	no	no	no	yes	no
Whole human reviewed proteome(UniProt release 2020_04)	WIPF3	A6NGB9	no	yes	no	no	no
Whole human reviewed proteome(UniProt release 2020_04)	WWC2-AS2	Q96NR7	no	no	no	no	no
Whole human reviewed proteome(UniProt release 2020_04)	WIPF2	Q8TF74	no	no	no	yes	yes
Whole human reviewed proteome(UniProt release 2020_04)	nan	Q8N6K4	no	no	no	no	no
Whole human reviewed proteome(UniProt release 2020_04)	nan	Q6ZR54	no	no	no	no	no
Whole human reviewed proteome(UniProt release 2020_04)	nan	Q6ZRX8	no	no	no	no	no
Whole human reviewed proteome(UniProt release 2020_04)	YPEL2	Q96QA6	no	no	yes	no	yes
Whole human reviewed proteome(UniProt release 2020_04)	YIPF7	Q8N8F6	no	yes	no	no	no
Whole human reviewed proteome(UniProt release 2020_04)	nan	Q6ZS46	no	no	no	no	no
Whole human reviewed proteome(UniProt release 2020_04)	ZWINT	O95229	no	no	no	no	yes
Whole human reviewed proteome(UniProt release 2020_04)	ZNF239	Q16600	no	no	yes	yes	no
Whole human reviewed proteome(UniProt release 2020_04)	ZNF550	Q7Z398	no	yes	no	no	no
Whole human reviewed proteome(UniProt release 2020_04)	ZDHHC21	Q8IVQ6	no	no	yes	yes	no
Whole human reviewed proteome(UniProt release 2020_04)	ZSCAN9	O15535	no	yes	no	no	no
Whole human reviewed proteome(UniProt release 2020_04)	ZNF23	P17027	no	no	yes	no	no
Whole human reviewed proteome(UniProt release 2020_04)	ZNF280C	Q8ND82	no	no	yes	no	yes
Whole human reviewed proteome(UniProt release 2020_04)	ZNF76	P36508	no	no	yes	yes	no
Whole human reviewed proteome(UniProt release 2020_04)	ZNF91	Q05481	no	no	yes	no	no
Whole human reviewed proteome(UniProt release 2020_04)	ZFHX3	Q15911	no	no	yes	no	yes
Whole human reviewed proteome(UniProt release 2020_04)	ZDHHC11B	P0C7U3	no	no	yes	no	no
Whole human reviewed proteome(UniProt release 2020_04)	ZC3H8	Q8N5P1	no	yes	no	no	no
Whole human reviewed proteome(UniProt release 2020_04)	ZNF71	Q9NQZ8	no	yes	no	no	no
Whole human reviewed proteome(UniProt release 2020_04)	ZNF581	Q9P0T4	no	yes	no	no	no
Whole human reviewed proteome(UniProt release 2020_04)	ZNF608	Q9ULD9	yes	no	yes	yes	yes
Whole human reviewed proteome(UniProt release 2020_04)	ZCCHC3	Q9NUD5	no	no	no	no	no
Whole human reviewed proteome(UniProt release 2020_04)	ZNF583	Q96ND8	no	yes	no	no	no
Whole human reviewed proteome(UniProt release 2020_04)	ZFAND4	Q86XD8	no	no	no	yes	no
Whole human reviewed proteome(UniProt release 2020_04)	ZDHHC20	Q5W0Z9	no	no	yes	yes	no
Whole human reviewed proteome(UniProt release 2020_04)	PTPRN	Q16849	no	no	yes	yes	yes
Whole human reviewed proteome(UniProt release 2020_04)	RAB12	Q6IQ22	no	no	no	no	yes
Whole human reviewed proteome(UniProt release 2020_04)	HNRNPA1L2	Q32P51	no	no	yes	no	no
Whole human reviewed proteome(UniProt release 2020_04)	RAB20	Q9NX57	no	no	no	no	no
Whole human reviewed proteome(UniProt release 2020_04)	R3HDM2	Q9Y2K5	no	no	yes	no	yes
Whole human reviewed proteome(UniProt release 2020_04)	CAD	P27708	no	no	no	yes	yes
Whole human reviewed proteome(UniProt release 2020_04)	RABGAP1L	B7ZAP0	no	no	yes	no	no
Whole human reviewed proteome(UniProt release 2020_04)	RABGAP1	Q9Y3P9	yes	no	yes	yes	yes
Whole human reviewed proteome(UniProt release 2020_04)	RBM42	Q9BTD8	no	no	no	no	yes
Whole human reviewed proteome(UniProt release 2020_04)	RBM7	Q9Y580	no	no	yes	yes	no
Whole human reviewed proteome(UniProt release 2020_04)	RAB40B	Q12829	no	no	yes	no	no
Whole human reviewed proteome(UniProt release 2020_04)	REPS1	Q96D71	no	no	yes	no	yes
Whole human reviewed proteome(UniProt release 2020_04)	RANBP2	P49792	no	no	no	no	yes
Whole human reviewed proteome(UniProt release 2020_04)	RBM14	Q96PK6	no	no	no	no	yes
Whole human reviewed proteome(UniProt release 2020_04)	RBM12B-AS1	Q9P1G2	no	no	no	no	no
Whole human reviewed proteome(UniProt release 2020_04)	RBBP9	O75884	no	no	no	yes	no
Whole human reviewed proteome(UniProt release 2020_04)	RHD	Q02161	no	yes	no	no	no
Whole human reviewed proteome(UniProt release 2020_04)	RAB11FIP3	O75154	yes	no	yes	yes	yes
Whole human reviewed proteome(UniProt release 2020_04)	RPL28	P46779	no	no	no	no	no
Whole human reviewed proteome(UniProt release 2020_04)	RPL31	P62899	no	no	no	no	yes
Whole human reviewed proteome(UniProt release 2020_04)	RPL6	Q02878	no	no	no	no	yes
Whole human reviewed proteome(UniProt release 2020_04)	RNF182	Q8N6D2	no	no	no	yes	yes
Whole human reviewed proteome(UniProt release 2020_04)	RRN3P1	Q2M238	no	no	no	no	no
Whole human reviewed proteome(UniProt release 2020_04)	RNF216	Q9NWF9	no	no	no	no	yes
Whole human reviewed proteome(UniProt release 2020_04)	RNF123	Q5XPI4	no	no	no	no	yes
Whole human reviewed proteome(UniProt release 2020_04)	MRPL11	Q9Y3B7	no	no	no	yes	yes
Whole human reviewed proteome(UniProt release 2020_04)	POLR2C	P19387	no	no	no	yes	yes
Whole human reviewed proteome(UniProt release 2020_04)	RPH3A	Q9Y2J0	no	no	yes	yes	yes
Whole human reviewed proteome(UniProt release 2020_04)	POLR3H	Q9Y535	no	no	no	yes	yes
Whole human reviewed proteome(UniProt release 2020_04)	SLC25A45	Q8N413	no	no	yes	yes	no
Whole human reviewed proteome(UniProt release 2020_04)	SLC26A3	P40879	no	no	yes	no	no
Whole human reviewed proteome(UniProt release 2020_04)	SNRPGP15	A8MWD9	no	no	no	no	no
Whole human reviewed proteome(UniProt release 2020_04)	SLC5A5	Q92911	no	no	no	no	yes
Whole human reviewed proteome(UniProt release 2020_04)	SLC35E2B	P0CK96	no	no	no	no	no
Whole human reviewed proteome(UniProt release 2020_04)	RYK	P34925	no	no	no	yes	no
Whole human reviewed proteome(UniProt release 2020_04)	SLC36A4	Q6YBV0	no	no	yes	yes	no
Whole human reviewed proteome(UniProt release 2020_04)	SEC22C	Q9BRL7	no	no	yes	yes	no
Whole human reviewed proteome(UniProt release 2020_04)	SLC5A6	Q9Y289	no	no	no	yes	no
Whole human reviewed proteome(UniProt release 2020_04)	RTEL1	Q9NZ71	no	no	no	yes	no
Whole human reviewed proteome(UniProt release 2020_04)	SNRPA1	P09661	no	no	no	yes	yes
Whole human reviewed proteome(UniProt release 2020_04)	SCHIP1	P0DPB3	no	no	no	no	yes
Whole human reviewed proteome(UniProt release 2020_04)	SCYGR2	A0A286YFB4	no	no	no	no	no
Whole human reviewed proteome(UniProt release 2020_04)	RTL5	Q5HYW3	no	yes	no	no	no
Whole human reviewed proteome(UniProt release 2020_04)	SIGLEC12	Q96PQ1	no	yes	no	no	no
Whole human reviewed proteome(UniProt release 2020_04)	SIRPG	Q9P1W8	no	yes	no	no	no
Whole human reviewed proteome(UniProt release 2020_04)	SGPP2	Q8IWX5	no	no	no	yes	no
Whole human reviewed proteome(UniProt release 2020_04)	SIGLEC14	Q08ET2	no	yes	no	no	no
Whole human reviewed proteome(UniProt release 2020_04)	SGPP1	Q9BX95	no	no	no	yes	yes
Whole human reviewed proteome(UniProt release 2020_04)	SIGLEC11	Q96RL6	no	yes	no	no	no
Whole human reviewed proteome(UniProt release 2020_04)	SELENOV	P59797	no	yes	no	no	no
Whole human reviewed proteome(UniProt release 2020_04)	ST3GAL6	Q9Y274	no	no	yes	no	no
Whole human reviewed proteome(UniProt release 2020_04)	SHISA7	A6NL88	no	no	no	no	no
Whole human reviewed proteome(UniProt release 2020_04)	SERINC2	Q96SA4	no	no	yes	no	no
Whole human reviewed proteome(UniProt release 2020_04)	SF3B2	Q13435	no	no	no	yes	yes
Whole human reviewed proteome(UniProt release 2020_04)	SDHAF4	Q5VUM1	no	yes	no	no	no
Whole human reviewed proteome(UniProt release 2020_04)	SERHL2	Q9H4I8	no	yes	no	no	no
Whole human reviewed proteome(UniProt release 2020_04)	SENP2	Q9HC62	yes	no	yes	yes	yes
Whole human reviewed proteome(UniProt release 2020_04)	SFI1	A8K8P3	no	yes	no	no	no
Whole human reviewed proteome(UniProt release 2020_04)	SCRT1	Q9BWW7	no	no	no	no	no
Whole human reviewed proteome(UniProt release 2020_04)	SPDYE11	P0DTA3	no	no	no	no	no
Whole human reviewed proteome(UniProt release 2020_04)	SNX33	Q8WV41	no	no	yes	no	yes
Whole human reviewed proteome(UniProt release 2020_04)	SERPINB10	P48595	no	yes	no	no	no
Whole human reviewed proteome(UniProt release 2020_04)	nan	A6NJR5	no	no	no	no	no
Whole human reviewed proteome(UniProt release 2020_04)	SP6	Q3SY56	no	no	yes	no	yes
Whole human reviewed proteome(UniProt release 2020_04)	SPATA13	Q96N96	no	no	yes	no	no
Whole human reviewed proteome(UniProt release 2020_04)	SON	P18583	no	no	no	no	yes
Whole human reviewed proteome(UniProt release 2020_04)	SPRTN	Q9H040	no	no	no	yes	yes
Whole human reviewed proteome(UniProt release 2020_04)	SPTSSA	Q969W0	no	no	no	no	no
Whole human reviewed proteome(UniProt release 2020_04)	STPG2	Q8N412	no	yes	no	no	no
Whole human reviewed proteome(UniProt release 2020_04)	TREM2	Q9NZC2	no	yes	no	no	no
Whole human reviewed proteome(UniProt release 2020_04)	TPPP	O94811	no	no	yes	no	yes
Whole human reviewed proteome(UniProt release 2020_04)	TNFRSF10C	O14798	no	yes	no	no	no
Whole human reviewed proteome(UniProt release 2020_04)	ZNF564	Q8TBZ8	no	yes	no	no	no
Whole human reviewed proteome(UniProt release 2020_04)	ZBTB9	Q96C00	no	yes	yes	no	no
Whole human reviewed proteome(UniProt release 2020_04)	ZBTB24	O43167	no	no	no	yes	no
Whole human reviewed proteome(UniProt release 2020_04)	ZFHX4	Q86UP3	yes	no	yes	yes	yes
Whole human reviewed proteome(UniProt release 2020_04)	ZMYM4	Q5VZL5	yes	no	yes	yes	yes
Whole human reviewed proteome(UniProt release 2020_04)	ZNF512B	Q96KM6	no	no	no	no	yes
Whole human reviewed proteome(UniProt release 2020_04)	ZC3H12C	Q9C0D7	yes	no	yes	yes	yes
Whole human reviewed proteome(UniProt release 2020_04)	TESK1	Q15569	yes	no	yes	yes	yes
Whole human reviewed proteome(UniProt release 2020_04)	SYT11	Q9BT88	no	no	yes	no	yes
Whole human reviewed proteome(UniProt release 2020_04)	TDRD5	Q8NAT2	no	no	no	yes	yes
Whole human reviewed proteome(UniProt release 2020_04)	L3HYPDH	Q96EM0	no	yes	no	no	no
Whole human reviewed proteome(UniProt release 2020_04)	TMEM229B	Q8NBD8	no	no	no	no	yes
Whole human reviewed proteome(UniProt release 2020_04)	TMEM132B	Q14DG7	no	no	yes	no	yes
Whole human reviewed proteome(UniProt release 2020_04)	TBC1D15	Q8TC07	no	no	yes	yes	no
Whole human reviewed proteome(UniProt release 2020_04)	CCT3	P49368	no	no	no	no	yes
Whole human reviewed proteome(UniProt release 2020_04)	SYTL5	Q8TDW5	no	no	yes	yes	yes
Whole human reviewed proteome(UniProt release 2020_04)	TBC1D3G	Q6DHY5	no	yes	no	no	no
Whole human reviewed proteome(UniProt release 2020_04)	TACC2	O95359	no	no	no	yes	no
Whole human reviewed proteome(UniProt release 2020_04)	TBX18	O95935	yes	no	yes	yes	yes
Whole human reviewed proteome(UniProt release 2020_04)	TCP11L1	Q9NUJ3	no	no	yes	yes	no
Whole human reviewed proteome(UniProt release 2020_04)	TMOD1	P28289	no	no	yes	yes	yes
Whole human reviewed proteome(UniProt release 2020_04)	TMPRSS13	Q9BYE2	no	no	yes	no	no
Whole human reviewed proteome(UniProt release 2020_04)	TM2D3	Q9BRN9	no	no	yes	yes	no
Whole human reviewed proteome(UniProt release 2020_04)	TRBJ2-2	A0A0A0MT94	no	no	no	no	no
Whole human reviewed proteome(UniProt release 2020_04)	TRAPPC4	Q9Y296	no	no	no	no	yes
Whole human reviewed proteome(UniProt release 2020_04)	TRDD1	P0DPR3	no	no	no	no	no
Whole human reviewed proteome(UniProt release 2020_04)	LRTOMT	Q8WZ04	no	yes	no	no	no
Whole human reviewed proteome(UniProt release 2020_04)	TRIM13	O60858	no	no	yes	yes	no
Whole human reviewed proteome(UniProt release 2020_04)	TRIM26	Q12899	no	no	no	yes	yes
Whole human reviewed proteome(UniProt release 2020_04)	THBD	P07204	no	no	no	no	no
Whole human reviewed proteome(UniProt release 2020_04)	TMEM50A	O95807	no	no	yes	yes	no
Whole human reviewed proteome(UniProt release 2020_04)	TULP4	Q9NRJ4	no	no	no	no	yes
Whole human reviewed proteome(UniProt release 2020_04)	TRBV14	A0A5B0	no	no	no	no	no
Whole human reviewed proteome(UniProt release 2020_04)	TVP23B	Q9NYZ1	no	no	yes	no	no
Whole human reviewed proteome(UniProt release 2020_04)	TSPAN18	Q96SJ8	no	no	yes	yes	no
Whole human reviewed proteome(UniProt release 2020_04)	TUSC1	Q2TAM9	no	yes	no	no	no
Whole human reviewed proteome(UniProt release 2020_04)	TYW5	A2RUC4	no	yes	no	no	no
Whole human reviewed proteome(UniProt release 2020_04)	TTI1	O43156	no	no	no	yes	yes
Whole human reviewed proteome(UniProt release 2020_04)	TSPYL1	Q9H0U9	no	yes	no	no	no
Whole human reviewed proteome(UniProt release 2020_04)	TSSK1B	Q9BXA7	no	no	yes	no	no
Whole human reviewed proteome(UniProt release 2020_04)	TTC7B	Q86TV6	no	no	yes	no	yes
Whole human reviewed proteome(UniProt release 2020_04)	UACA	Q9BZF9	no	no	yes	yes	no
Whole human reviewed proteome(UniProt release 2020_04)	TRPS1	Q9UHF7	no	no	no	no	yes
Whole human reviewed proteome(UniProt release 2020_04)	SLC25A1	P53007	no	no	no	no	yes
Whole human reviewed proteome(UniProt release 2020_04)	TRPV3	Q8NET8	no	no	yes	no	no
Whole human reviewed proteome(UniProt release 2020_04)	UBL4B	Q8N7F7	no	yes	no	no	no
Whole human reviewed proteome(UniProt release 2020_04)	UBL4A	P11441	no	yes	no	no	no
Whole human reviewed proteome(UniProt release 2020_04)	VPS9D1	Q9Y2B5	no	no	no	yes	no
Whole human reviewed proteome(UniProt release 2020_04)	HERV-K104	P63124	no	no	no	no	no
Whole human reviewed proteome(UniProt release 2020_04)	VPS51	Q9UID3	no	no	no	yes	no
Whole human reviewed proteome(UniProt release 2020_04)	VPS11	Q9H270	no	yes	no	no	yes
Whole human reviewed proteome(UniProt release 2020_04)	VPS25	Q9BRG1	no	no	no	no	yes
Whole human reviewed proteome(UniProt release 2020_04)	USP40	Q9NVE5	no	yes	no	no	no
Whole human reviewed proteome(UniProt release 2020_04)	VPS33B	Q9H267	no	no	no	no	yes
Whole human reviewed proteome(UniProt release 2020_04)	VAT1	Q99536	no	no	yes	yes	no
Whole human reviewed proteome(UniProt release 2020_04)	VASH2	Q86V25	no	no	yes	yes	yes
Whole human reviewed proteome(UniProt release 2020_04)	WWTR1	Q9GZV5	yes	no	yes	yes	yes
Whole human reviewed proteome(UniProt release 2020_04)	XAF1	Q6GPH4	no	yes	no	no	no
Whole human reviewed proteome(UniProt release 2020_04)	WASHC2C	Q9Y4E1	no	no	no	no	no
Whole human reviewed proteome(UniProt release 2020_04)	XKR4	Q5GH76	no	no	yes	no	yes
Whole human reviewed proteome(UniProt release 2020_04)	nan	Q6ZTI0	no	no	no	no	no
Whole human reviewed proteome(UniProt release 2020_04)	nan	A6NL46	no	no	no	no	no
Whole human reviewed proteome(UniProt release 2020_04)	YIPF5	Q969M3	no	no	no	no	yes
Whole human reviewed proteome(UniProt release 2020_04)	UNQ9370/PRO34162	Q6UXP9	no	no	no	no	no
Whole human reviewed proteome(UniProt release 2020_04)	ZNF275	Q9NSD4	no	yes	no	no	no
Whole human reviewed proteome(UniProt release 2020_04)	ZNF285	Q96NJ3	no	yes	no	no	no
Whole human reviewed proteome(UniProt release 2020_04)	ZNF222	Q9UK12	no	yes	no	no	no
Whole human reviewed proteome(UniProt release 2020_04)	ZNF317	Q96PQ6	no	no	no	no	yes
Whole human reviewed proteome(UniProt release 2020_04)	ZNF33B	Q06732	no	yes	no	no	no
Whole human reviewed proteome(UniProt release 2020_04)	ZNF367	Q7RTV3	no	no	no	no	yes
Whole human reviewed proteome(UniProt release 2020_04)	nan	Q9BTK2	no	no	no	no	no
Whole human reviewed proteome(UniProt release 2020_04)	SERPINA10	Q9UK55	no	no	yes	no	no
Whole human reviewed proteome(UniProt release 2020_04)	ZNF837	Q96EG3	no	yes	no	no	no
Whole human reviewed proteome(UniProt release 2020_04)	ZNF432	O94892	no	yes	no	no	no
Whole human reviewed proteome(UniProt release 2020_04)	ZNF492	Q9P255	no	yes	no	no	no
Whole human reviewed proteome(UniProt release 2020_04)	ZNF860	A6NHJ4	no	no	yes	no	no
Whole human reviewed proteome(UniProt release 2020_04)	ZSWIM6	Q9HCJ5	no	no	yes	yes	no
Whole human reviewed proteome(UniProt release 2020_04)	ZNF547	Q8IVP9	no	no	yes	no	no
Whole human reviewed proteome(UniProt release 2020_04)	ZKSCAN8	Q15776	no	yes	no	no	no
Whole human reviewed proteome(UniProt release 2020_04)	nan	Q6ZVQ6	no	no	no	no	no
Whole human reviewed proteome(UniProt release 2020_04)	ZNF580	Q9UK33	no	no	no	no	no
Whole human reviewed proteome(UniProt release 2020_04)	ZFPL1	O95159	no	no	no	yes	no
Whole human reviewed proteome(UniProt release 2020_04)	ZNF641	Q96N77	no	no	no	yes	no
Whole human reviewed proteome(UniProt release 2020_04)	ZNF7	P17097	no	yes	no	no	no
Whole human reviewed proteome(UniProt release 2020_04)	ZNF664	Q8N3J9	no	yes	no	no	no
Whole human reviewed proteome(UniProt release 2020_04)	YTHDF3	Q7Z739	no	no	yes	no	yes
Whole human reviewed proteome(UniProt release 2020_04)	ZDHHC1	Q8WTX9	no	no	yes	yes	no
Whole human reviewed proteome(UniProt release 2020_04)	nan	A8MT66	no	no	no	no	no
Whole human reviewed proteome(UniProt release 2020_04)	ZHX2	Q9Y6X8	no	no	yes	yes	yes
Whole human reviewed proteome(UniProt release 2020_04)	ZNF625	Q96I27	no	yes	no	no	no
Whole human reviewed proteome(UniProt release 2020_04)	ZC3H12A	Q5D1E8	no	no	yes	no	yes
Whole human reviewed proteome(UniProt release 2020_04)	SRF	P11831	no	no	no	yes	yes
Whole human reviewed proteome(UniProt release 2020_04)	SULT2A1	Q06520	no	no	yes	no	no
Whole human reviewed proteome(UniProt release 2020_04)	ST20-AS1	Q8NBB2	no	no	no	no	no
Whole human reviewed proteome(UniProt release 2020_04)	SULT4A1	Q9BR01	yes	no	yes	yes	yes
Whole human reviewed proteome(UniProt release 2020_04)	STAT4	Q14765	no	no	yes	no	yes
Whole human reviewed proteome(UniProt release 2020_04)	nan	Q5VSD8	no	no	no	no	no
Whole human reviewed proteome(UniProt release 2020_04)	nan	Q96NJ1	no	no	no	no	no
Whole human reviewed proteome(UniProt release 2020_04)	nan	Q8N9W7	no	no	no	no	no
Whole human reviewed proteome(UniProt release 2020_04)	ZNF215	Q9UL58	no	yes	no	no	no
Whole human reviewed proteome(UniProt release 2020_04)	ZNRF2	Q8NHG8	no	no	no	no	no
Whole human reviewed proteome(UniProt release 2020_04)	ZNF233	A6NK53	no	yes	no	no	no
Whole human reviewed proteome(UniProt release 2020_04)	ZNF709	Q8N972	no	yes	no	no	no
Whole human reviewed proteome(UniProt release 2020_04)	ZNF883	P0CG24	no	no	no	no	no
Whole human reviewed proteome(UniProt release 2020_04)	ZNF862	O60290	no	yes	no	no	no
Whole human reviewed proteome(UniProt release 2020_04)	ZBTB42	B2RXF5	no	no	no	no	no
Whole human reviewed proteome(UniProt release 2020_04)	ZSWIM2	Q8NEG5	no	no	no	yes	no
Whole human reviewed proteome(UniProt release 2020_04)	ZSWIM5	Q9P217	no	no	yes	yes	yes
Whole human reviewed proteome(UniProt release 2020_04)	ZDHHC23	Q8IYP9	no	no	no	yes	no
Whole human reviewed proteome(UniProt release 2020_04)	ZSCAN5C	A6NGD5	no	yes	no	no	no
Whole human reviewed proteome(UniProt release 2020_04)	ZNF560	Q96MR9	no	yes	no	no	no
Whole human reviewed proteome(UniProt release 2020_04)	ZSCAN26	Q16670	no	no	no	no	no
Whole human reviewed proteome(UniProt release 2020_04)	ZCRB1	Q8TBF4	no	yes	no	no	no
Whole human reviewed proteome(UniProt release 2020_04)	ZNF385D	Q9H6B1	no	no	yes	no	yes
Whole human reviewed proteome(UniProt release 2020_04)	ZIM2	Q9NZV7	no	yes	no	no	no
Whole human reviewed proteome(UniProt release 2020_04)	STK19	P49842	no	yes	no	no	no
Whole human reviewed proteome(UniProt release 2020_04)	STAG3L1	P0CL83	no	no	no	no	no
Whole human reviewed proteome(UniProt release 2020_04)	TNP2	Q05952	no	yes	no	no	no
Whole human reviewed proteome(UniProt release 2020_04)	SNX8	Q9Y5X2	no	no	no	no	yes
Whole human reviewed proteome(UniProt release 2020_04)	YPEL4	Q96NS1	no	no	yes	no	yes
Whole human reviewed proteome(UniProt release 2020_04)	ZNF205	O95201	no	no	yes	yes	no
Whole human reviewed proteome(UniProt release 2020_04)	ZNF282	Q9UDV7	no	no	no	no	yes
Whole human reviewed proteome(UniProt release 2020_04)	ZNF330	Q9Y3S2	no	no	no	no	yes
Whole human reviewed proteome(UniProt release 2020_04)	TJP2	Q9UDY2	no	no	yes	yes	yes
Whole human reviewed proteome(UniProt release 2020_04)	ZNF331	Q9NQX6	no	no	no	no	no
Whole human reviewed proteome(UniProt release 2020_04)	ZNF700	Q9H0M5	no	no	yes	no	no
Whole human reviewed proteome(UniProt release 2020_04)	ZNF714	Q96N38	no	yes	no	no	no
Whole human reviewed proteome(UniProt release 2020_04)	ZNF415	Q09FC8	no	yes	no	no	no
Whole human reviewed proteome(UniProt release 2020_04)	ZPLD1	Q8TCW7	no	no	no	yes	no
Whole human reviewed proteome(UniProt release 2020_04)	ZNF765	Q7L2R6	no	yes	no	no	no
Whole human reviewed proteome(UniProt release 2020_04)	ZNF818P	Q6ZRF7	no	no	no	no	no
Whole human reviewed proteome(UniProt release 2020_04)	ZNF782	Q6ZMW2	no	no	yes	no	no
Whole human reviewed proteome(UniProt release 2020_04)	ZNF787	Q6DD87	no	no	no	no	yes
Whole human reviewed proteome(UniProt release 2020_04)	ZNF501	Q96CX3	no	yes	no	no	no
Whole human reviewed proteome(UniProt release 2020_04)	ZNF442	Q9H7R0	no	yes	no	no	no
Whole human reviewed proteome(UniProt release 2020_04)	ZSCAN5A	Q9BUG6	no	yes	no	no	no
Whole human reviewed proteome(UniProt release 2020_04)	UNQ9165/PRO28630	Q6UXU0	no	no	no	no	no
Whole human reviewed proteome(UniProt release 2020_04)	ZNF17	P17021	no	no	yes	no	no
Whole human reviewed proteome(UniProt release 2020_04)	PP6455	Q8WZ26	no	no	no	no	no
Whole human reviewed proteome(UniProt release 2020_04)	ZBTB22	O15209	no	yes	no	no	yes
Whole human reviewed proteome(UniProt release 2020_04)	ZNF503	Q96F45	no	no	yes	no	yes
Whole human reviewed proteome(UniProt release 2020_04)	ZNF562	Q6V9R5	no	yes	no	no	no
Whole human reviewed proteome(UniProt release 2020_04)	ZNF25	P17030	no	yes	no	no	no
Whole human reviewed proteome(UniProt release 2020_04)	ZNF528	Q3MIS6	no	no	yes	no	no
Whole human reviewed proteome(UniProt release 2020_04)	ZNF563	Q8TA94	no	yes	no	no	no
Whole human reviewed proteome(UniProt release 2020_04)	ZNF844	Q08AG5	no	yes	no	no	no
Whole human reviewed proteome(UniProt release 2020_04)	ZIC5	Q96T25	no	no	yes	no	no
Whole human reviewed proteome(UniProt release 2020_04)	ZC2HC1C	Q53FD0	no	no	no	yes	no
Whole human reviewed proteome(UniProt release 2020_04)	ZBTB11	O95625	no	no	no	yes	yes
Whole human reviewed proteome(UniProt release 2020_04)	ZFP41	Q8N8Y5	no	yes	no	no	no
Whole human reviewed proteome(UniProt release 2020_04)	ZNF628	Q5EBL2	no	no	no	no	yes
Whole human reviewed proteome(UniProt release 2020_04)	SYNGR4	O95473	no	no	no	yes	no
Whole human reviewed proteome(UniProt release 2020_04)	SRY	Q05066	no	yes	no	no	no
Whole human reviewed proteome(UniProt release 2020_04)	SQOR	Q9Y6N5	no	yes	no	no	no
Whole human reviewed proteome(UniProt release 2020_04)	SRXN1	Q9BYN0	no	no	no	no	yes
Whole human reviewed proteome(UniProt release 2020_04)	SYDE2	Q5VT97	no	no	yes	yes	no
Whole human reviewed proteome(UniProt release 2020_04)	TTL	Q8NG68	no	no	no	yes	yes
Whole human reviewed proteome(UniProt release 2020_04)	UMAD1	C9J7I0	no	no	no	no	no
Whole human reviewed proteome(UniProt release 2020_04)	UNC13C	Q8NB66	no	no	yes	no	no
Whole human reviewed proteome(UniProt release 2020_04)	UPK2	O00526	no	no	no	yes	no
Whole human reviewed proteome(UniProt release 2020_04)	UCN2	Q96RP3	no	yes	no	no	no
Whole human reviewed proteome(UniProt release 2020_04)	UBE3B	Q7Z3V4	no	no	no	yes	yes
Whole human reviewed proteome(UniProt release 2020_04)	UBTD2	Q8WUN7	no	no	yes	yes	yes
Whole human reviewed proteome(UniProt release 2020_04)	UBQLN1	Q9UMX0	yes	no	yes	yes	yes
Whole human reviewed proteome(UniProt release 2020_04)	UNC50	Q53HI1	no	yes	no	no	no
Whole human reviewed proteome(UniProt release 2020_04)	UBE2T	Q9NPD8	no	no	no	no	yes
Whole human reviewed proteome(UniProt release 2020_04)	VANGL1	Q8TAA9	no	no	yes	yes	yes
Whole human reviewed proteome(UniProt release 2020_04)	UTS2B	Q765I0	no	yes	no	no	no
Whole human reviewed proteome(UniProt release 2020_04)	VWA5B2	Q8N398	no	no	no	yes	no
Whole human reviewed proteome(UniProt release 2020_04)	VWC2	Q2TAL6	no	no	no	no	yes
Whole human reviewed proteome(UniProt release 2020_04)	WASHC3	Q9Y3C0	no	yes	no	no	no
Whole human reviewed proteome(UniProt release 2020_04)	XIRP1	Q702N8	no	yes	no	no	no
Whole human reviewed proteome(UniProt release 2020_04)	XKR5	Q6UX68	no	no	no	no	no
Whole human reviewed proteome(UniProt release 2020_04)	WASH4P	A8MWX3	no	no	no	no	no
Whole human reviewed proteome(UniProt release 2020_04)	WDR4	P57081	no	no	no	yes	no
Whole human reviewed proteome(UniProt release 2020_04)	WDR72	Q3MJ13	no	yes	no	no	no
Whole human reviewed proteome(UniProt release 2020_04)	WNT7A	O00755	no	no	yes	yes	yes
Whole human reviewed proteome(UniProt release 2020_04)	VRK2	Q86Y07	no	no	yes	yes	no
Whole human reviewed proteome(UniProt release 2020_04)	WWC3	Q9ULE0	no	no	yes	no	yes
Whole human reviewed proteome(UniProt release 2020_04)	YAE1	Q9NRH1	no	yes	no	no	no
Whole human reviewed proteome(UniProt release 2020_04)	YBEY	P58557	no	yes	no	no	no
Whole human reviewed proteome(UniProt release 2020_04)	YPEL3	P61236	no	no	yes	yes	no
Whole human reviewed proteome(UniProt release 2020_04)	nan	Q8NFD4	no	no	no	no	no
Whole human reviewed proteome(UniProt release 2020_04)	nan	Q96MT0	no	no	no	no	no
Whole human reviewed proteome(UniProt release 2020_04)	SLC30A10	Q6XR72	no	no	no	yes	yes
Whole human reviewed proteome(UniProt release 2020_04)	SLC30A2	Q9BRI3	no	no	yes	yes	yes
Whole human reviewed proteome(UniProt release 2020_04)	ZNF219	Q9P2Y4	no	no	no	no	yes
Whole human reviewed proteome(UniProt release 2020_04)	ZNF729	A6NN14	no	no	yes	no	no
Whole human reviewed proteome(UniProt release 2020_04)	ZNF710	Q8N1W2	yes	no	yes	yes	yes
Whole human reviewed proteome(UniProt release 2020_04)	ZNF750	Q32MQ0	no	no	no	yes	no
Whole human reviewed proteome(UniProt release 2020_04)	ZNF443	Q9Y2A4	no	no	yes	no	no
Whole human reviewed proteome(UniProt release 2020_04)	ZRANB3	Q5FWF4	no	yes	no	no	no
Whole human reviewed proteome(UniProt release 2020_04)	ZNF771	Q7L3S4	no	yes	no	no	no
Whole human reviewed proteome(UniProt release 2020_04)	ZNF831	Q5JPB2	no	yes	no	no	no
Whole human reviewed proteome(UniProt release 2020_04)	ZNF454	Q8N9F8	no	no	no	yes	no
Whole human reviewed proteome(UniProt release 2020_04)	ZNF462	Q96JM2	no	no	no	no	yes
Whole human reviewed proteome(UniProt release 2020_04)	ZNF846	Q147U1	no	yes	no	no	no
Whole human reviewed proteome(UniProt release 2020_04)	ZSCAN2	Q7Z7L9	no	no	no	yes	no
Whole human reviewed proteome(UniProt release 2020_04)	ZNF488	Q96MN9	no	yes	no	no	no
Whole human reviewed proteome(UniProt release 2020_04)	ZNF516	Q92618	no	no	no	yes	yes
Whole human reviewed proteome(UniProt release 2020_04)	ZNF19	P17023	no	yes	no	no	no
Whole human reviewed proteome(UniProt release 2020_04)	ZNF12	P17014	no	no	yes	no	no
Whole human reviewed proteome(UniProt release 2020_04)	ZNF558	Q96NG5	no	yes	no	no	no
Whole human reviewed proteome(UniProt release 2020_04)	ZNF512	Q96ME7	no	no	no	no	yes
Whole human reviewed proteome(UniProt release 2020_04)	ZNF573	Q86YE8	no	no	yes	no	no
Whole human reviewed proteome(UniProt release 2020_04)	AZGP1	P25311	no	no	no	yes	no
Whole human reviewed proteome(UniProt release 2020_04)	ZBTB17	Q13105	yes	no	yes	yes	yes
Whole human reviewed proteome(UniProt release 2020_04)	ZDHHC17	Q8IUH5	no	no	yes	no	yes
Whole human reviewed proteome(UniProt release 2020_04)	ZNF585A	Q6P3V2	no	no	yes	no	no
Whole human reviewed proteome(UniProt release 2020_04)	BCAS2	O75934	no	no	no	no	yes
Whole human reviewed proteome(UniProt release 2020_04)	SLCO1A2	P46721	no	no	yes	no	no
Whole human reviewed proteome(UniProt release 2020_04)	SPI1	P17947	no	no	yes	no	yes
Whole human reviewed proteome(UniProt release 2020_04)	SLC10A6	Q3KNW5	no	no	yes	no	no
Whole human reviewed proteome(UniProt release 2020_04)	SERPINA12	Q8IW75	no	no	yes	yes	no
Whole human reviewed proteome(UniProt release 2020_04)	SSBP1	Q04837	no	yes	no	no	no
Whole human reviewed proteome(UniProt release 2020_04)	SOX14	O95416	no	no	yes	no	yes
Whole human reviewed proteome(UniProt release 2020_04)	SKP1	P63208	no	no	no	no	yes
Whole human reviewed proteome(UniProt release 2020_04)	SPATA33	Q96N06	no	yes	no	no	no
Whole human reviewed proteome(UniProt release 2020_04)	SERTAD1	Q9UHV2	no	no	no	no	yes
Whole human reviewed proteome(UniProt release 2020_04)	SNAI3	Q3KNW1	no	no	yes	no	no
Whole human reviewed proteome(UniProt release 2020_04)	SPATA32	Q96LK8	no	no	no	yes	no
Whole human reviewed proteome(UniProt release 2020_04)	SERTM2	A0A1B0GWG4	no	no	no	no	no
Whole human reviewed proteome(UniProt release 2020_04)	SVOPL	Q8N434	no	no	no	yes	no
Whole human reviewed proteome(UniProt release 2020_04)	SYNRG	Q9UMZ2	no	no	no	no	no
Whole human reviewed proteome(UniProt release 2020_04)	SYNE3	Q6ZMZ3	no	no	no	yes	no
Whole human reviewed proteome(UniProt release 2020_04)	VSTM2L	Q96N03	no	no	no	yes	no
Whole human reviewed proteome(UniProt release 2020_04)	XRCC6	P12956	no	no	no	no	yes
Whole human reviewed proteome(UniProt release 2020_04)	WASHC5	Q12768	no	yes	no	no	no
Whole human reviewed proteome(UniProt release 2020_04)	WNK2	Q9Y3S1	no	no	no	no	yes
Whole human reviewed proteome(UniProt release 2020_04)	WWC2	Q6AWC2	no	no	yes	yes	no
Whole human reviewed proteome(UniProt release 2020_04)	YJU2	Q9BW85	no	no	no	no	no
Whole human reviewed proteome(UniProt release 2020_04)	nan	A6NHS1	no	no	no	no	no
Whole human reviewed proteome(UniProt release 2020_04)	nan	Q6ZUT4	no	no	no	no	no
Whole human reviewed proteome(UniProt release 2020_04)	nan	Q8NBF4	no	no	no	no	no
Whole human reviewed proteome(UniProt release 2020_04)	ZNF302	Q9NR11	no	yes	no	no	no
Whole human reviewed proteome(UniProt release 2020_04)	ZZZ3	Q8IYH5	no	no	no	no	yes
Whole human reviewed proteome(UniProt release 2020_04)	ZNF358	Q9NW07	no	no	no	no	yes
Whole human reviewed proteome(UniProt release 2020_04)	ZNF362	Q5T0B9	yes	no	yes	yes	yes
Whole human reviewed proteome(UniProt release 2020_04)	ZNF816	Q0VGE8	no	yes	no	no	no
Whole human reviewed proteome(UniProt release 2020_04)	ZNF736	B4DX44	no	yes	no	no	no
Whole human reviewed proteome(UniProt release 2020_04)	ZNF446	Q9NWS9	no	yes	no	no	no
Whole human reviewed proteome(UniProt release 2020_04)	ZSCAN16	Q9H4T2	no	yes	no	no	no
Whole human reviewed proteome(UniProt release 2020_04)	ZNF826P	Q6ZT77	no	no	no	no	no
Whole human reviewed proteome(UniProt release 2020_04)	ZNF469	Q96JG9	no	no	no	no	no
Whole human reviewed proteome(UniProt release 2020_04)	ZNF474	Q6S9Z5	no	no	no	yes	no
Whole human reviewed proteome(UniProt release 2020_04)	ZSCAN10	Q96SZ4	no	no	no	yes	no
Whole human reviewed proteome(UniProt release 2020_04)	ZMAT3	Q9HA38	no	yes	no	no	no
Whole human reviewed proteome(UniProt release 2020_04)	ZBTB34	Q8NCN2	no	no	yes	no	yes
Whole human reviewed proteome(UniProt release 2020_04)	ZNF606	Q8WXB4	no	no	yes	no	no
Whole human reviewed proteome(UniProt release 2020_04)	ZMYM1	Q5SVZ6	no	yes	no	no	no
Whole human reviewed proteome(UniProt release 2020_04)	ZMAT4	Q9H898	no	no	yes	no	yes
Whole human reviewed proteome(UniProt release 2020_04)	ZNF107	Q9UII5	no	no	yes	no	no
Whole human reviewed proteome(UniProt release 2020_04)	ZAR1L	A6NP61	no	no	yes	no	no
Whole human reviewed proteome(UniProt release 2020_04)	ZBTB41	Q5SVQ8	no	no	no	no	yes
Whole human reviewed proteome(UniProt release 2020_04)	ZER1	Q7Z7L7	no	no	no	yes	yes
Whole human reviewed proteome(UniProt release 2020_04)	ZNF610	Q8N9Z0	no	yes	no	no	no
Whole human reviewed proteome(UniProt release 2020_04)	ZNF680	Q8NEM1	no	yes	no	no	no
Whole human reviewed proteome(UniProt release 2020_04)	ZNF630	Q2M218	no	no	yes	no	no
Whole human reviewed proteome(UniProt release 2020_04)	ZFAND2B	Q8WV99	no	no	yes	no	no
Whole human reviewed proteome(UniProt release 2020_04)	ZNF140	P52738	no	yes	no	no	no
Whole human reviewed proteome(UniProt release 2020_04)	ZNF646	O15015	no	no	no	yes	no
Whole human reviewed proteome(UniProt release 2020_04)	ZFP30	Q9Y2G7	no	no	yes	no	no
Whole human reviewed proteome(UniProt release 2020_04)	ZNF148	Q9UQR1	no	no	yes	no	yes
Whole human reviewed proteome(UniProt release 2020_04)	SNAPC4	Q5SXM2	no	yes	no	no	no
Whole human reviewed proteome(UniProt release 2020_04)	SPINT4	Q6UDR6	no	yes	no	no	no
Whole human reviewed proteome(UniProt release 2020_04)	SPRR2G	Q9BYE4	no	yes	no	no	no
Whole human reviewed proteome(UniProt release 2020_04)	SPTLC2	O15270	no	no	yes	yes	yes
Whole human reviewed proteome(UniProt release 2020_04)	SMYD2	Q9NRG4	no	no	yes	no	yes
Whole human reviewed proteome(UniProt release 2020_04)	STRADB	Q9C0K7	no	no	yes	no	yes
Whole human reviewed proteome(UniProt release 2020_04)	SYCP1	Q15431	no	no	no	no	yes
Whole human reviewed proteome(UniProt release 2020_04)	WFDC6	Q9BQY6	no	yes	no	no	no
Whole human reviewed proteome(UniProt release 2020_04)	WFDC5	Q8TCV5	no	no	no	yes	no
Whole human reviewed proteome(UniProt release 2020_04)	VSIG2	Q96IQ7	no	no	yes	no	no
Whole human reviewed proteome(UniProt release 2020_04)	WFDC9	Q8NEX5	no	yes	no	no	no
Whole human reviewed proteome(UniProt release 2020_04)	UNQ5830/PRO19650/PRO19816	Q6UY13	no	no	no	no	no
Whole human reviewed proteome(UniProt release 2020_04)	nan	Q6ZRG5	no	no	no	no	no
Whole human reviewed proteome(UniProt release 2020_04)	nan	Q6ZQT7	no	no	no	no	no
Whole human reviewed proteome(UniProt release 2020_04)	ZNF214	Q9UL59	no	no	yes	no	no
Whole human reviewed proteome(UniProt release 2020_04)	ZNF256	Q9Y2P7	no	no	yes	no	no
Whole human reviewed proteome(UniProt release 2020_04)	ZNF274	Q96GC6	no	yes	no	no	no
Whole human reviewed proteome(UniProt release 2020_04)	nan	Q8N8P6	no	no	no	no	no
Whole human reviewed proteome(UniProt release 2020_04)	ZNF346	Q9UL40	no	no	yes	yes	yes
Whole human reviewed proteome(UniProt release 2020_04)	ZNF699	Q32M78	no	no	yes	no	no
Whole human reviewed proteome(UniProt release 2020_04)	ZNF737	O75373	no	yes	no	no	no
Whole human reviewed proteome(UniProt release 2020_04)	ZNF395	Q9H8N7	no	no	yes	yes	no
Whole human reviewed proteome(UniProt release 2020_04)	ZNF416	Q9BWM5	no	no	yes	no	no
Whole human reviewed proteome(UniProt release 2020_04)	ZNF806	P0C7X5	no	no	no	no	no
Whole human reviewed proteome(UniProt release 2020_04)	ZNF18	P17022	no	no	no	yes	no
Whole human reviewed proteome(UniProt release 2020_04)	nan	Q6ZPA2	no	no	no	no	no
Whole human reviewed proteome(UniProt release 2020_04)	nan	Q8WTZ3	no	no	no	no	no
Whole human reviewed proteome(UniProt release 2020_04)	ZNF135	P52742	no	no	yes	no	no
Whole human reviewed proteome(UniProt release 2020_04)	ZNF609	O15014	yes	no	yes	yes	yes
Whole human reviewed proteome(UniProt release 2020_04)	ZNF525	Q8N782	no	yes	no	no	no
Whole human reviewed proteome(UniProt release 2020_04)	ZDHHC7	Q9NXF8	no	no	yes	no	no
Whole human reviewed proteome(UniProt release 2020_04)	ZNF546	Q86UE3	no	no	yes	no	no
Whole human reviewed proteome(UniProt release 2020_04)	ZBTB38	Q8NAP3	no	no	yes	no	yes
Whole human reviewed proteome(UniProt release 2020_04)	ZC3H4	Q9UPT8	yes	no	yes	yes	yes
Whole human reviewed proteome(UniProt release 2020_04)	ZNF780B	Q9Y6R6	no	no	yes	no	no
Whole human reviewed proteome(UniProt release 2020_04)	ZC3H11A	O75152	no	no	no	no	no
Whole human reviewed proteome(UniProt release 2020_04)	ZC3H18	Q86VM9	no	no	no	no	yes
Whole human reviewed proteome(UniProt release 2020_04)	ZNF180	Q9UJW8	no	yes	no	no	no
Whole human reviewed proteome(UniProt release 2020_04)	SURF1	Q15526	no	yes	no	no	no
Whole human reviewed proteome(UniProt release 2020_04)	NR5A1	Q13285	no	no	yes	no	yes
Whole human reviewed proteome(UniProt release 2020_04)	INPP5D	Q92835	no	no	yes	yes	yes
Whole human reviewed proteome(UniProt release 2020_04)	SUN1	O94901	no	no	yes	no	no
Whole human reviewed proteome(UniProt release 2020_04)	STARD8	Q92502	no	no	yes	yes	no
Whole human reviewed proteome(UniProt release 2020_04)	TRIM34	Q9BYJ4	no	yes	no	no	no
Whole human reviewed proteome(UniProt release 2020_04)	TOX4	O94842	no	no	yes	no	yes
Whole human reviewed proteome(UniProt release 2020_04)	TRIM14	Q14142	no	no	no	yes	no
Whole human reviewed proteome(UniProt release 2020_04)	TRIM74	Q86UV6	no	no	no	no	no
Whole human reviewed proteome(UniProt release 2020_04)	TOMM34	Q15785	no	no	yes	yes	yes
Whole human reviewed proteome(UniProt release 2020_04)	TOPAZ1	Q8N9V7	no	no	no	yes	no
Whole human reviewed proteome(UniProt release 2020_04)	TRIAP1	O43715	no	no	no	no	no
Whole human reviewed proteome(UniProt release 2020_04)	PTP4A2	Q12974	no	no	yes	yes	yes
Whole human reviewed proteome(UniProt release 2020_04)	TYRO3	Q06418	no	no	yes	yes	yes
Whole human reviewed proteome(UniProt release 2020_04)	TWIST1	Q15672	no	no	no	no	yes
Whole human reviewed proteome(UniProt release 2020_04)	TRAV23DV6	A0A075B6W5	no	no	no	no	no
Whole human reviewed proteome(UniProt release 2020_04)	TRBV7-7	A0A0K0K1E9	no	no	no	no	no
Whole human reviewed proteome(UniProt release 2020_04)	TYR	P14679	no	no	no	yes	no
Whole human reviewed proteome(UniProt release 2020_04)	TRAV8-1	A0A0A6YYK1	no	no	no	no	no
Whole human reviewed proteome(UniProt release 2020_04)	TUB	P50607	no	no	yes	yes	yes
Whole human reviewed proteome(UniProt release 2020_04)	LINC00643	Q86TS7	no	no	no	no	no
Whole human reviewed proteome(UniProt release 2020_04)	TRBV19	A0A075B6N1	no	no	no	no	no
Whole human reviewed proteome(UniProt release 2020_04)	YY2	O15391	no	yes	no	no	no
Whole human reviewed proteome(UniProt release 2020_04)	TTK	P33981	no	no	no	yes	yes
Whole human reviewed proteome(UniProt release 2020_04)	YY1	P25490	no	no	yes	no	yes
Whole human reviewed proteome(UniProt release 2020_04)	THBS4	P35443	no	no	yes	no	no
Whole human reviewed proteome(UniProt release 2020_04)	TSPYL4	Q9UJ04	no	yes	no	no	no
Whole human reviewed proteome(UniProt release 2020_04)	TTR	P02766	no	no	no	yes	no
Whole human reviewed proteome(UniProt release 2020_04)	U2AF1L5	P0DN76	no	no	no	no	no
Whole human reviewed proteome(UniProt release 2020_04)	TSPAN10	Q9H1Z9	no	no	no	no	no
Whole human reviewed proteome(UniProt release 2020_04)	TMSB4Y	O14604	no	yes	no	no	no
Whole human reviewed proteome(UniProt release 2020_04)	TPD52L2	O43399	no	no	yes	no	no
Whole human reviewed proteome(UniProt release 2020_04)	TTLL11	Q8NHH1	no	yes	no	no	no
Whole human reviewed proteome(UniProt release 2020_04)	TTPA	P49638	no	no	yes	yes	no
Whole human reviewed proteome(UniProt release 2020_04)	TTC7A	Q9ULT0	no	no	yes	yes	no
Whole human reviewed proteome(UniProt release 2020_04)	UBE2B	P63146	no	no	yes	yes	yes
Whole human reviewed proteome(UniProt release 2020_04)	NME9	Q86XW9	no	yes	no	no	no
Whole human reviewed proteome(UniProt release 2020_04)	TRPM8	Q7Z2W7	no	no	yes	no	yes
Whole human reviewed proteome(UniProt release 2020_04)	UBE2G2	P60604	no	no	no	yes	yes
Whole human reviewed proteome(UniProt release 2020_04)	USP15	Q9Y4E8	no	no	yes	no	yes
Whole human reviewed proteome(UniProt release 2020_04)	UFSP1	Q6NVU6	no	yes	no	no	no
Whole human reviewed proteome(UniProt release 2020_04)	UBL3	O95164	no	no	no	no	yes
Whole human reviewed proteome(UniProt release 2020_04)	UMODL1-AS1	Q8N2C9	no	no	no	no	no
Whole human reviewed proteome(UniProt release 2020_04)	UBXN4	Q92575	no	no	no	yes	yes
Whole human reviewed proteome(UniProt release 2020_04)	UGT2B10	P36537	no	no	yes	no	no
Whole human reviewed proteome(UniProt release 2020_04)	UCK2	Q9BZX2	no	no	yes	no	yes
Whole human reviewed proteome(UniProt release 2020_04)	UNC93B1	Q9H1C4	no	no	yes	no	yes
Whole human reviewed proteome(UniProt release 2020_04)	UCMA	Q8WVF2	no	yes	no	no	no
Whole human reviewed proteome(UniProt release 2020_04)	UNC5CL	Q8IV45	no	yes	no	no	no
Whole human reviewed proteome(UniProt release 2020_04)	USP2	O75604	no	no	yes	yes	yes
Whole human reviewed proteome(UniProt release 2020_04)	UBTFL1	P0CB47	no	no	no	no	no
Whole human reviewed proteome(UniProt release 2020_04)	USP35	Q9P2H5	no	no	yes	no	yes
Whole human reviewed proteome(UniProt release 2020_04)	USP49	Q70CQ1	no	no	yes	no	yes
Whole human reviewed proteome(UniProt release 2020_04)	VPS4A	Q9UN37	no	no	yes	no	yes
Whole human reviewed proteome(UniProt release 2020_04)	VPS26A	O75436	no	no	no	no	yes
Whole human reviewed proteome(UniProt release 2020_04)	ZNF555	Q8NEP9	no	yes	no	no	no
Whole human reviewed proteome(UniProt release 2020_04)	ZNF598	Q86UK7	no	yes	no	no	no
Whole human reviewed proteome(UniProt release 2020_04)	ZCCHC18	P0CG32	no	yes	no	no	no
Whole human reviewed proteome(UniProt release 2020_04)	ZDBF2	Q9HCK1	no	no	no	yes	no
Whole human reviewed proteome(UniProt release 2020_04)	ZBTB2	Q8N680	no	no	no	yes	yes
Whole human reviewed proteome(UniProt release 2020_04)	ZNF672	Q499Z4	no	no	no	yes	no
Whole human reviewed proteome(UniProt release 2020_04)	AARS2	Q5JTZ9	no	yes	no	no	no
Whole human reviewed proteome(UniProt release 2020_04)	SOWAHA	Q2M3V2	no	no	yes	no	no
Whole human reviewed proteome(UniProt release 2020_04)	SUSD1	Q6UWL2	no	yes	no	no	no
Whole human reviewed proteome(UniProt release 2020_04)	SSX6P	Q7RTT6	no	no	no	no	no
Whole human reviewed proteome(UniProt release 2020_04)	STAG2	Q8N3U4	yes	no	yes	yes	yes
Whole human reviewed proteome(UniProt release 2020_04)	SULT1C3	Q6IMI6	no	no	yes	no	no
Whole human reviewed proteome(UniProt release 2020_04)	STMP1	E0CX11	no	no	no	no	no
Whole human reviewed proteome(UniProt release 2020_04)	STMND1	H3BQB6	no	no	no	no	no
Whole human reviewed proteome(UniProt release 2020_04)	ST7	Q9NRC1	yes	no	yes	yes	yes
Whole human reviewed proteome(UniProt release 2020_04)	UVRAG	Q9P2Y5	no	no	no	no	yes
Whole human reviewed proteome(UniProt release 2020_04)	UTRN	P46939	no	no	yes	no	yes
Whole human reviewed proteome(UniProt release 2020_04)	WASH2P	Q6VEQ5	no	no	no	no	no
Whole human reviewed proteome(UniProt release 2020_04)	XKRY	O14609	no	no	no	no	no
Whole human reviewed proteome(UniProt release 2020_04)	WNT2B	Q93097	no	no	yes	yes	yes
Whole human reviewed proteome(UniProt release 2020_04)	SLC7A7	Q9UM01	no	no	yes	yes	no
Whole human reviewed proteome(UniProt release 2020_04)	nan	Q8N1Y9	no	no	no	no	no
Whole human reviewed proteome(UniProt release 2020_04)	nan	Q6ZSV7	no	no	no	no	no
Whole human reviewed proteome(UniProt release 2020_04)	nan	Q9UFV3	no	no	no	no	no
Whole human reviewed proteome(UniProt release 2020_04)	nan	Q6ZS52	no	no	no	no	no
Whole human reviewed proteome(UniProt release 2020_04)	nan	Q8N976	no	no	no	no	no
Whole human reviewed proteome(UniProt release 2020_04)	ZNF182	P17025	no	no	yes	no	no
Whole human reviewed proteome(UniProt release 2020_04)	ZNF202	O95125	no	no	no	yes	no
Whole human reviewed proteome(UniProt release 2020_04)	ZNF232	Q9UNY5	no	yes	no	no	no
Whole human reviewed proteome(UniProt release 2020_04)	ZNF225	Q9UK10	no	yes	no	no	no
Whole human reviewed proteome(UniProt release 2020_04)	ZNF251	Q9BRH9	no	no	yes	no	no
Whole human reviewed proteome(UniProt release 2020_04)	ZNF277	Q9NRM2	no	no	no	yes	no
Whole human reviewed proteome(UniProt release 2020_04)	ZNF217	O75362	no	no	no	yes	yes
Whole human reviewed proteome(UniProt release 2020_04)	ZNF283	Q8N7M2	no	no	yes	no	no
Whole human reviewed proteome(UniProt release 2020_04)	ZNF701	Q9NV72	no	no	yes	no	no
Whole human reviewed proteome(UniProt release 2020_04)	ZNF318	Q5VUA4	no	no	no	yes	no
Whole human reviewed proteome(UniProt release 2020_04)	ZNF300	Q96RE9	no	yes	no	no	no
Whole human reviewed proteome(UniProt release 2020_04)	ZNF808	Q8N4W9	no	yes	no	no	no
Whole human reviewed proteome(UniProt release 2020_04)	ZNF467	Q7Z7K2	no	yes	no	no	no
Whole human reviewed proteome(UniProt release 2020_04)	YTHDC2	Q9H6S0	no	no	no	yes	yes
Whole human reviewed proteome(UniProt release 2020_04)	ZNF829	Q3KNS6	no	no	yes	no	no
Whole human reviewed proteome(UniProt release 2020_04)	ZSCAN18	Q8TBC5	no	no	no	no	no
Whole human reviewed proteome(UniProt release 2020_04)	ZNF891	A8MT65	no	no	no	no	no
Whole human reviewed proteome(UniProt release 2020_04)	nan	Q6ZSA8	no	no	no	no	no
Whole human reviewed proteome(UniProt release 2020_04)	ZSCAN21	Q9Y5A6	no	yes	no	no	no
Whole human reviewed proteome(UniProt release 2020_04)	ZNF592	Q92610	no	no	yes	no	yes
Whole human reviewed proteome(UniProt release 2020_04)	ZNF295-AS1	Q8N0V1	no	no	no	no	no
Whole human reviewed proteome(UniProt release 2020_04)	ZSWIM8	A7E2V4	no	no	no	yes	yes
Whole human reviewed proteome(UniProt release 2020_04)	ZNF880	Q6PDB4	no	yes	no	no	no
Whole human reviewed proteome(UniProt release 2020_04)	ZFYVE9	O95405	no	no	yes	no	yes
Whole human reviewed proteome(UniProt release 2020_04)	ZBTB8A	Q96BR9	no	no	no	yes	yes
Whole human reviewed proteome(UniProt release 2020_04)	ZNF81	P51508	no	yes	no	no	no
Whole human reviewed proteome(UniProt release 2020_04)	UNQ6493/PRO21345	Q6UXR8	no	no	no	no	no
Whole human reviewed proteome(UniProt release 2020_04)	ZNF619	Q8N2I2	no	yes	no	no	no
Whole human reviewed proteome(UniProt release 2020_04)	ZFP28	Q8NHY6	no	no	no	yes	no
Whole human reviewed proteome(UniProt release 2020_04)	ZFAND3	Q9H8U3	no	no	no	no	yes
Whole human reviewed proteome(UniProt release 2020_04)	ZCCHC13	Q8WW36	no	yes	no	no	no
Whole human reviewed proteome(UniProt release 2020_04)	ZNF616	Q08AN1	no	no	yes	no	no
Whole human reviewed proteome(UniProt release 2020_04)	ZNF804B	A4D1E1	no	no	yes	yes	no
Whole human reviewed proteome(UniProt release 2020_04)	ZC3H13	Q5T200	no	no	no	yes	yes
Whole human reviewed proteome(UniProt release 2020_04)	ZNF354C	Q86Y25	no	yes	no	no	no
Whole human reviewed proteome(UniProt release 2020_04)	ZNF683	Q8IZ20	no	yes	no	no	no
Whole human reviewed proteome(UniProt release 2020_04)	METTL1	Q9UBP6	no	no	no	yes	yes
Whole human reviewed proteome(UniProt release 2020_04)	TCHH	Q07283	no	no	no	no	yes
Whole human reviewed proteome(UniProt release 2020_04)	TRH	P20396	no	no	no	yes	no
Whole human reviewed proteome(UniProt release 2020_04)	PBK	Q96KB5	no	no	no	no	yes
Whole human reviewed proteome(UniProt release 2020_04)	TRDN	Q13061	no	no	no	yes	no
Whole human reviewed proteome(UniProt release 2020_04)	TRIM54	Q9BYV2	no	yes	no	no	no
Whole human reviewed proteome(UniProt release 2020_04)	TRAV8-2	A0A0B4J237	no	no	no	no	no
Whole human reviewed proteome(UniProt release 2020_04)	TRAV36DV7	A0A075B6V5	no	no	no	no	no
Whole human reviewed proteome(UniProt release 2020_04)	TREX2	Q9BQ50	no	yes	no	no	no
Whole human reviewed proteome(UniProt release 2020_04)	TRBV5-5	A0A597	no	no	no	no	no
Whole human reviewed proteome(UniProt release 2020_04)	USP17L8	P0C7I0	no	no	no	no	no
Whole human reviewed proteome(UniProt release 2020_04)	TRBV12-5	A0A1B0GX78	no	no	no	no	no
Whole human reviewed proteome(UniProt release 2020_04)	USP17L10	C9JJH3	no	no	no	no	no
Whole human reviewed proteome(UniProt release 2020_04)	TSPAN33	Q86UF1	no	no	no	yes	no
Whole human reviewed proteome(UniProt release 2020_04)	TSPYL6	Q8N831	no	no	no	no	no
Whole human reviewed proteome(UniProt release 2020_04)	UBB	P0CG47	no	no	yes	no	yes
Whole human reviewed proteome(UniProt release 2020_04)	VPREB3	Q9UKI3	no	no	no	yes	no
Whole human reviewed proteome(UniProt release 2020_04)	ATP6V1G2	O95670	no	no	yes	no	no
Whole human reviewed proteome(UniProt release 2020_04)	VPS53	Q5VIR6	no	no	no	no	yes
Whole human reviewed proteome(UniProt release 2020_04)	ERVK-21	P63119	no	no	no	no	no
Whole human reviewed proteome(UniProt release 2020_04)	VPS72	Q15906	no	no	no	no	yes
Whole human reviewed proteome(UniProt release 2020_04)	VPS50	Q96JG6	no	no	no	no	yes
Whole human reviewed proteome(UniProt release 2020_04)	VAX2	Q9UIW0	no	no	yes	yes	no
Whole human reviewed proteome(UniProt release 2020_04)	VXN	Q8TAG6	no	no	no	yes	no
Whole human reviewed proteome(UniProt release 2020_04)	VWA3B	Q502W6	no	yes	no	no	no
Whole human reviewed proteome(UniProt release 2020_04)	WDR7	Q9Y4E6	no	no	no	yes	yes
Whole human reviewed proteome(UniProt release 2020_04)	XAGE1A	Q9HD64	no	no	no	no	no
Whole human reviewed proteome(UniProt release 2020_04)	XPNPEP1	Q9NQW7	no	no	no	yes	yes
Whole human reviewed proteome(UniProt release 2020_04)	WDR24	Q96S15	no	no	no	no	yes
Whole human reviewed proteome(UniProt release 2020_04)	WFDC2	Q14508	no	no	no	yes	no
Whole human reviewed proteome(UniProt release 2020_04)	VSIG10	Q8N0Z9	no	no	no	yes	no
Whole human reviewed proteome(UniProt release 2020_04)	WDR36	Q8NI36	no	no	no	yes	no
Whole human reviewed proteome(UniProt release 2020_04)	PP632	Q6XCG6	no	no	no	no	no
Whole human reviewed proteome(UniProt release 2020_04)	nan	Q6ZS92	no	no	no	no	no
Whole human reviewed proteome(UniProt release 2020_04)	nan	Q6ZRN7	no	no	no	no	no
Whole human reviewed proteome(UniProt release 2020_04)	nan	A8MU10	no	no	no	no	no
Whole human reviewed proteome(UniProt release 2020_04)	nan	Q6ZRU5	no	no	no	no	no
Whole human reviewed proteome(UniProt release 2020_04)	CREBZF	Q9NS37	no	yes	no	no	no
Whole human reviewed proteome(UniProt release 2020_04)	ZNF532	Q9HCE3	no	no	yes	no	yes
Whole human reviewed proteome(UniProt release 2020_04)	ZNF697	Q5TEC3	no	yes	no	no	no
Whole human reviewed proteome(UniProt release 2020_04)	ZNF705G	A8MUZ8	no	yes	no	no	no
Whole human reviewed proteome(UniProt release 2020_04)	ZNF644	Q9H582	no	no	no	no	yes
Whole human reviewed proteome(UniProt release 2020_04)	ST14	Q9Y5Y6	no	no	yes	yes	yes
Whole human reviewed proteome(UniProt release 2020_04)	STK4	Q13043	no	no	yes	yes	yes
Whole human reviewed proteome(UniProt release 2020_04)	TPRN	Q4KMQ1	no	no	no	no	no
Whole human reviewed proteome(UniProt release 2020_04)	TRIM42	Q8IWZ5	no	no	no	yes	no
[truncated: 18,361 more rows]

## Sheet: Supplementary table 6
Table S6: Dosage sensitivity features of the 89 confident LLPS drivers.
Group	Gene name	UniProt AC	MRDS	MRDIS	Ohnologs	Copy number conserved genes	Haploinssuficient genes
LLPS driver	NCK1	P16333	no	no	yes	no	yes
LLPS driver	GRB2	P62993	no	no	yes	yes	yes
LLPS driver	EWSR1	Q01844	no	no	no	no	yes
LLPS driver	PTBP1	P26599	no	no	yes	no	yes
LLPS driver	RPL5	P46777	no	no	no	no	yes
LLPS driver	UBQLN2	Q9UHD9	no	no	no	no	yes
LLPS driver	SOX2	P48431	no	no	yes	yes	yes
LLPS driver	AR	P10275	no	no	yes	no	yes
LLPS driver	LCP2	Q13094	yes	no	yes	yes	yes
LLPS driver	SYN2	Q92777	no	no	yes	no	no
LLPS driver	GRAP2	O75791	no	no	no	yes	yes
LLPS driver	NPM1	P06748	no	no	no	no	yes
LLPS driver	LAT	O43561	no	no	no	no	yes
LLPS driver	HNRNPH1	P31943	no	no	yes	no	yes
LLPS driver	CSTF2	P33240	no	no	no	yes	yes
LLPS driver	NPHS1	O60500	no	no	no	no	yes
LLPS driver	MED1	Q15648	no	no	no	yes	yes
LLPS driver	FMR1	Q06787	no	no	yes	no	yes
LLPS driver	SQSTM1	Q13501	no	no	no	yes	yes
LLPS driver	BRD4	O60885	yes	no	yes	yes	yes
LLPS driver	HNRNPDL	O14979	no	no	yes	no	yes
LLPS driver	DDX4	Q9NQI0	no	no	no	no	yes
LLPS driver	MYC	P01106	no	no	yes	yes	no
LLPS driver	HNRNPA2B1	P22626	yes	no	yes	yes	yes
LLPS driver	VHL	P40337	no	no	no	no	yes
LLPS driver	CCNT1	O60563	yes	no	yes	yes	yes
LLPS driver	DLG4	P78352	yes	no	yes	yes	yes
LLPS driver	TIAL1	Q01085	no	no	yes	no	yes
LLPS driver	SPOP	O43791	no	no	yes	no	yes
LLPS driver	DYRK1A	Q13627	no	no	yes	no	yes
LLPS driver	FUS	P35637	no	no	no	no	yes
LLPS driver	GATA2	P23769	yes	no	yes	yes	yes
LLPS driver	DAZAP1	Q96EP5	no	no	no	no	yes
LLPS driver	HOMER3	Q9NSC5	no	no	yes	no	yes
LLPS driver	TAF15	Q92804	no	yes	no	no	no
LLPS driver	ELN	P15502	no	yes	no	no	no
LLPS driver	HNRNPH2	P55795	no	no	yes	no	yes
LLPS driver	TIA1	P31483	no	no	yes	yes	yes
LLPS driver	ESR1	P03372	yes	no	yes	yes	yes
LLPS driver	UBC	P0CG48	no	no	yes	no	yes
LLPS driver	HNRNPA3	P51991	no	no	yes	no	yes
LLPS driver	TARDBP	Q13148	no	no	no	no	yes
LLPS driver	CBX5	P45973	no	no	yes	no	yes
LLPS driver	SURF6	O75683	no	yes	no	no	no
LLPS driver	CSTF2T	Q9H0L4	no	yes	no	no	no
LLPS driver	SOS1	Q07889	yes	no	yes	yes	yes
LLPS driver	RPL23A	P62750	no	no	no	no	yes
LLPS driver	APP	P05067	no	no	yes	yes	yes
LLPS driver	HNRNPH3	P31942	no	no	yes	no	yes
LLPS driver	MAPT	P10636	no	no	no	yes	yes
LLPS driver	CGAS	Q8N884	no	yes	no	no	no
LLPS driver	SYN1	P17600	no	no	yes	no	yes
LLPS driver	PSPC1	Q8WXF1	yes	no	yes	yes	yes
LLPS driver	GNL2	Q13823	no	no	no	yes	yes
LLPS driver	RARA	P10276	yes	no	yes	yes	yes
LLPS driver	CBX2	Q14781	no	no	no	yes	yes
LLPS driver	NANOG	Q9H9S0	no	no	no	no	yes
LLPS driver	DDX3X	O00571	no	no	no	no	yes
LLPS driver	HNRNPA0	Q13151	no	no	yes	no	yes
LLPS driver	PRNP	P04156	no	yes	no	no	no
LLPS driver	POLR2A	P24928	no	no	no	no	yes
LLPS driver	DAXX	Q9UER7	no	no	no	yes	yes
LLPS driver	HNRNPA1	P09651	no	no	yes	no	yes
LLPS driver	U2AF2	P26368	no	no	no	no	yes
LLPS driver	AGO2	Q9UKV8	yes	no	yes	yes	yes
LLPS driver	TP53BP1	Q12888	no	no	no	no	yes
LLPS driver	RBM14	Q96PK6	no	no	no	no	yes
LLPS driver	NUP153	P49790	no	no	no	yes	yes
LLPS driver	NUP98	P52948	no	no	no	no	yes
LLPS driver	GATA3	P23771	no	no	yes	yes	yes
LLPS driver	LGALS3	P17931	no	no	yes	yes	yes
LLPS driver	TNRC6B	Q9UPQ9	no	no	yes	no	yes
LLPS driver	SYNGAP1	Q96PV0	no	no	yes	yes	yes
LLPS driver	WASL	O00401	yes	no	yes	yes	yes
LLPS driver	YTHDF3	Q7Z739	no	no	yes	no	yes
LLPS driver	YTHDF1	Q9BYJ9	no	no	yes	no	yes
LLPS driver	MORC3	Q14149	no	no	no	yes	yes
LLPS driver	YTHDF2	Q9Y5A9	yes	no	yes	yes	yes
LLPS driver	COIL	P38432	no	no	no	no	yes
LLPS driver	SRSF2	Q01130	no	no	no	no	yes
LLPS driver	SFPQ	P23246	no	no	yes	no	yes
LLPS driver	HSPB2	Q16082	no	no	yes	no	no
LLPS driver	HNRNPD	Q14103	no	no	yes	no	yes
LLPS driver	DDX1	Q92499	no	no	no	no	yes
LLPS driver	NONO	Q15233	no	no	yes	no	yes
LLPS driver	PML	P29590	no	no	no	yes	yes
LLPS driver	KHDRBS1	Q07666	yes	no	yes	yes	yes
LLPS driver	ZFP36L1	Q07352	no	no	yes	no	yes
LLPS driver	MATR3	P43243	no	no	no	no	yes

## Sheet: Supplementary table 7
Table S7: Dosage sensitivity features of genes in the randomly selected well-annotated gene sets.
Group	UniProt AC	Gene name	MRDS	MRDIS	Ohnologs	Copy number conserved genes	Haploinssuficient genes
randomized set 1	P19801	AOC1	no	no	yes	no	no
randomized set 1	Q9HBH1	PDF	no	yes	no	no	no
randomized set 1	P05783	KRT18	no	no	yes	no	yes
randomized set 1	Q8IZL9	CDK20	no	no	no	no	yes
randomized set 1	O95298	NDUFC2	no	no	no	no	no
randomized set 1	Q9H1D0	TRPV6	no	no	yes	no	no
randomized set 1	Q8NHG8	ZNRF2	no	no	no	no	no
randomized set 1	O95236	APOL3	no	yes	no	no	no
randomized set 1	Q12951	FOXI1	no	no	yes	yes	no
randomized set 1	Q8NFW8	CMAS	no	no	no	yes	yes
randomized set 1	Q9P000	COMMD9	no	no	no	no	no
randomized set 1	Q5W0Z9	ZDHHC20	no	no	yes	yes	no
randomized set 1	Q8N5B7	CERS5	no	no	yes	no	no
randomized set 1	Q8NAU1	FNDC5	no	no	no	yes	no
randomized set 1	Q8IZD9	DOCK3	yes	no	yes	yes	yes
randomized set 1	Q9HAU4	SMURF2	no	no	yes	no	yes
randomized set 1	P59998	ARPC4	no	no	no	no	yes
randomized set 1	P15151	PVR	no	no	yes	no	no
randomized set 1	P02766	TTR	no	no	no	yes	no
randomized set 1	Q9BQP7	MGME1	no	no	no	yes	no
randomized set 1	Q96GQ7	DDX27	no	no	no	no	yes
randomized set 1	Q9BS16	CENPK	no	no	no	no	yes
randomized set 1	Q96HA1	POM121	no	no	no	no	no
randomized set 1	P78318	IGBP1	no	no	no	no	yes
randomized set 1	P01112	HRAS	no	no	yes	no	yes
randomized set 1	Q9NX57	RAB20	no	no	no	no	no
randomized set 1	Q9UKS7	IKZF2	yes	no	yes	yes	yes
randomized set 1	Q6ZW61	BBS12	no	yes	no	no	no
randomized set 1	Q9Y2L9	LRCH1	no	no	yes	no	yes
randomized set 1	Q9UP38	FZD1	no	no	yes	no	yes
randomized set 1	Q9UM00	TMCO1	no	no	no	yes	no
randomized set 1	Q96MX3	ZNF48	no	no	no	no	yes
randomized set 1	Q12884	FAP	no	no	yes	yes	yes
randomized set 1	Q9NP79	VTA1	no	no	no	yes	yes
randomized set 1	P30536	TSPO	no	no	no	yes	no
randomized set 1	Q02952	AKAP12	no	no	no	yes	yes
randomized set 1	Q9H8N7	ZNF395	no	no	yes	yes	no
randomized set 1	Q9NRF9	POLE3	no	no	no	no	yes
randomized set 1	Q6P1W5	C1orf94	no	no	no	yes	no
randomized set 1	Q15415	RBMY1F	no	no	no	no	no
randomized set 1	P35813	PPM1A	no	no	yes	no	yes
randomized set 1	P38117	ETFB	no	yes	no	no	no
randomized set 1	Q12906	ILF3	yes	no	yes	yes	yes
randomized set 1	Q969U7	PSMG2	no	no	no	no	yes
randomized set 1	Q96IY4	CPB2	no	no	yes	yes	no
randomized set 1	Q66K89	E4F1	no	no	no	yes	yes
randomized set 1	Q4L235	AASDH	no	no	no	yes	no
randomized set 1	P39900	MMP12	no	no	no	no	no
randomized set 1	Q6NVU6	UFSP1	no	yes	no	no	no
randomized set 1	O00744	WNT10B	no	no	yes	no	yes
randomized set 1	P62699	YPEL5	no	no	no	yes	yes
randomized set 1	Q99471	PFDN5	no	no	no	no	yes
randomized set 1	Q9UHV2	SERTAD1	no	no	no	no	yes
randomized set 1	Q9NWN3	FBXO34	no	yes	no	no	no
randomized set 1	Q92614	MYO18A	yes	no	yes	yes	yes
randomized set 1	Q9UBG3	CRNN	no	no	no	yes	no
randomized set 1	P05060	CHGB	no	no	no	yes	no
randomized set 1	Q13098	GPS1	no	no	no	no	yes
randomized set 1	Q9BWQ8	FAIM2	no	no	yes	no	yes
randomized set 1	P06744	GPI	no	no	no	no	yes
randomized set 1	Q6UXZ4	UNC5D	no	no	yes	yes	yes
randomized set 1	Q6P2H3	CEP85	no	no	yes	yes	no
randomized set 1	Q9BU61	NDUFAF3	no	no	no	yes	no
randomized set 1	Q14241	ELOA	no	no	no	yes	yes
randomized set 1	P13671	C6	no	no	yes	yes	no
randomized set 1	Q8WVQ1	CANT1	no	no	no	yes	no
randomized set 1	Q14565	DMC1	no	no	no	no	yes
randomized set 1	Q6PKX4	DOK6	no	no	yes	yes	yes
randomized set 1	Q9Y222	DMTF1	no	no	no	yes	yes
randomized set 1	P14635	CCNB1	no	no	yes	no	yes
randomized set 1	Q6ZMH5	SLC39A5	no	no	no	yes	no
randomized set 1	Q86XJ1	GAS2L3	no	no	yes	yes	no
randomized set 1	P23435	CBLN1	no	no	yes	no	yes
randomized set 1	P23219	PTGS1	no	no	yes	yes	yes
randomized set 1	Q99933	BAG1	no	no	no	no	no
randomized set 1	Q9HBI1	PARVB	no	no	yes	no	no
randomized set 1	Q9BZ23	PANK2	no	no	yes	yes	no
randomized set 1	Q8NFZ5	TNIP2	no	no	no	yes	yes
randomized set 1	Q8IWL8	STH	no	yes	no	no	no
randomized set 1	P48751	SLC4A3	no	no	yes	yes	yes
randomized set 1	O75674	TOM1L1	no	no	no	yes	yes
randomized set 1	P06454	PTMA	no	yes	no	no	no
randomized set 1	P57055	RIPPLY3	no	yes	no	no	no
randomized set 1	Q9BZ72	PITPNM2	yes	no	yes	yes	yes
randomized set 1	A7E2Y1	MYH7B	no	no	yes	no	yes
randomized set 1	Q9HAB3	SLC52A2	no	no	yes	no	no
randomized set 1	Q5W0Q7	USPL1	no	no	no	yes	no
randomized set 1	Q96DU7	ITPKC	no	no	yes	yes	yes
randomized set 1	O75069	TMCC2	no	no	yes	yes	yes
randomized set 2	Q8TAF8	LHFPL5	no	no	yes	yes	no
randomized set 2	P62341	SELENOT	no	yes	no	no	no
randomized set 2	Q15637	SF1	no	no	no	yes	yes
randomized set 2	Q9P2K3	RCOR3	no	no	yes	yes	yes
randomized set 2	P04792	HSPB1	no	no	no	no	yes
randomized set 2	Q7Z628	NET1	no	no	yes	yes	yes
randomized set 2	Q7RTU1	TCF23	no	no	no	yes	no
randomized set 2	Q99966	CITED1	no	no	no	yes	no
randomized set 2	Q04206	RELA	no	no	yes	no	yes
randomized set 2	O95672	ECEL1	no	no	yes	yes	yes
randomized set 2	Q6ZXV5	TMTC3	no	no	no	yes	no
randomized set 2	P20783	NTF3	no	no	yes	yes	yes
randomized set 2	P09913	IFIT2	no	yes	no	no	no
randomized set 2	Q15819	UBE2V2	no	yes	no	no	no
randomized set 2	Q14185	DOCK1	no	no	yes	no	yes
randomized set 2	Q8WVD3	RNF138	no	no	yes	yes	yes
randomized set 2	Q9GZY8	MFF	no	no	no	no	yes
randomized set 2	Q9Y2D8	SSX2IP	no	no	no	yes	yes
randomized set 2	Q13308	PTK7	no	no	no	yes	yes
randomized set 2	Q2NKQ1	SGSM1	no	no	yes	no	yes
randomized set 2	Q6FI13	H2AC18	no	no	yes	no	no
randomized set 2	P10242	MYB	no	no	yes	yes	yes
randomized set 2	Q9H7H0	METTL17	no	no	no	yes	no
randomized set 2	Q99873	PRMT1	no	no	yes	no	yes
randomized set 2	Q9Y2W2	WBP11	no	no	no	no	yes
randomized set 2	Q16853	AOC3	no	yes	no	no	no
randomized set 2	Q32M88	PGGHG	no	yes	no	no	no
randomized set 2	P51571	SSR4	no	no	no	no	yes
randomized set 2	P26641	EEF1G	no	no	no	no	yes
randomized set 2	Q96PH1	NOX5	no	yes	no	no	no
randomized set 2	Q6P3W2	DNAJC24	no	yes	no	no	no
randomized set 2	Q12791	KCNMA1	no	no	yes	no	yes
randomized set 2	O00571	DDX3X	no	no	no	no	yes
randomized set 2	Q6UXV4	APOOL	no	no	yes	no	no
randomized set 2	C4AMC7	WASH3P	no	no	no	no	no
randomized set 2	P29016	CD1B	no	yes	no	no	no
randomized set 2	O75718	CRTAP	no	no	yes	no	no
randomized set 2	Q15113	PCOLCE	no	no	yes	no	yes
randomized set 2	P63252	KCNJ2	no	no	yes	yes	yes
randomized set 2	Q96RE9	ZNF300	no	yes	no	no	no
randomized set 2	Q0VAQ4	SMAGP	no	no	no	yes	no
randomized set 2	Q8N8B7	TCEANC	no	yes	no	no	no
randomized set 2	Q9BWN1	PRR14	no	no	no	yes	yes
randomized set 2	Q8IY34	SLC15A3	no	no	yes	yes	no
randomized set 2	Q86Y07	VRK2	no	no	yes	yes	no
randomized set 2	Q8IZL2	MAML2	no	no	no	no	yes
randomized set 2	Q13033	STRN3	no	no	yes	yes	yes
randomized set 2	O15265	ATXN7	yes	no	yes	yes	yes
randomized set 2	P04839	CYBB	no	no	yes	yes	yes
randomized set 2	P41732	TSPAN7	no	no	yes	no	no
randomized set 2	P52657	GTF2A2	no	no	no	yes	yes
randomized set 2	Q86WA6	BPHL	no	yes	no	no	no
randomized set 2	Q9Y233	PDE10A	no	no	no	no	yes
randomized set 2	Q9NQP4	PFDN4	no	no	no	no	yes
randomized set 2	O14618	CCS	no	yes	no	no	no
randomized set 2	O60346	PHLPP1	yes	no	yes	yes	yes
randomized set 2	Q86YL7	PDPN	no	no	no	yes	no
randomized set 2	Q6ZW33	MICALCL	no	no	no	no	no
randomized set 2	Q96Q04	LMTK3	no	no	yes	no	no
randomized set 2	Q15431	SYCP1	no	no	no	no	yes
randomized set 2	Q8WWY3	PRPF31	no	no	no	yes	yes
randomized set 2	P52306	RAP1GDS1	no	no	no	yes	yes
randomized set 2	Q9NZ42	PSENEN	no	no	no	no	yes
randomized set 2	Q9BXR0	QTRT1	no	no	no	yes	no
randomized set 2	Q9C0J9	BHLHE41	no	no	no	no	no
randomized set 2	P30101	PDIA3	no	no	no	no	yes
randomized set 2	Q8IYK4	COLGALT2	no	no	yes	yes	no
randomized set 2	O00213	APBB1	yes	no	yes	yes	yes
randomized set 2	P0DJI9	SAA2	no	yes	no	no	no
randomized set 2	Q13113	PDZK1IP1	no	yes	no	no	no
randomized set 2	Q92839	HAS1	no	yes	no	no	no
randomized set 2	Q7L804	RAB11FIP2	no	no	no	yes	yes
randomized set 2	Q05940	SLC18A2	no	no	yes	no	yes
randomized set 2	P13647	KRT5	no	no	yes	no	yes
randomized set 2	P62873	GNB1	no	no	yes	no	yes
randomized set 2	Q9UKF5	ADAM29	no	no	yes	no	no
randomized set 2	Q9NZN4	EHD2	no	no	yes	no	yes
randomized set 2	Q6UWP7	LCLAT1	no	no	no	yes	no
randomized set 2	Q96P31	FCRL3	no	yes	no	no	no
randomized set 2	Q9BYE3	LCE3D	no	yes	no	no	no
randomized set 2	Q95460	MR1	no	yes	no	no	no
randomized set 2	Q9Y6X3	MAU2	no	no	no	yes	yes
randomized set 2	Q9NS23	RASSF1	no	no	yes	yes	no
randomized set 2	Q9H4Z3	PCIF1	no	no	no	yes	yes
randomized set 2	Q8IV20	LACC1	no	no	no	yes	no
randomized set 2	Q93091	RNASE6	no	yes	no	no	no
randomized set 2	Q9ULT0	TTC7A	no	no	yes	yes	no
randomized set 2	Q96RR1	TWNK	no	no	no	yes	yes
randomized set 2	Q9H3H3	C11orf68	no	yes	no	no	no
randomized set 3	Q13148	TARDBP	no	no	no	no	yes
randomized set 3	Q9UBP4	DKK3	no	no	no	yes	no
randomized set 3	Q5VIR6	VPS53	no	no	no	no	yes
randomized set 3	P50851	LRBA	no	no	yes	no	no
randomized set 3	P42575	CASP2	no	no	yes	yes	yes
randomized set 3	Q15102	PAFAH1B3	no	no	yes	no	no
randomized set 3	Q9HCK5	AGO4	no	no	yes	no	yes
randomized set 3	Q99678	GPR20	no	yes	no	no	no
randomized set 3	Q8TAV3	CYP2W1	no	no	yes	no	no
randomized set 3	A6NK06	ACOD1	no	no	no	no	no
randomized set 3	Q9Y6M1	IGF2BP2	yes	no	yes	yes	yes
randomized set 3	Q9NRA2	SLC17A5	no	no	no	yes	yes
randomized set 3	Q03013	GSTM4	no	yes	no	no	no
randomized set 3	Q6UW15	REG3G	no	yes	no	no	no
randomized set 3	P05026	ATP1B1	yes	no	yes	yes	yes
randomized set 3	Q15762	CD226	no	no	no	no	no
randomized set 3	Q9UM01	SLC7A7	no	no	yes	yes	no
randomized set 3	P10720	PF4V1	no	yes	no	no	no
randomized set 3	Q14123	PDE1C	no	no	yes	yes	yes
randomized set 3	P61160	ACTR2	no	no	yes	no	yes
randomized set 3	Q96PN6	ADCY10	no	no	no	yes	no
randomized set 3	O15061	SYNM	no	no	no	yes	no
randomized set 3	Q9NW64	RBM22	no	no	no	yes	yes
randomized set 3	Q9BXS6	NUSAP1	no	yes	no	no	no
randomized set 3	P40225	THPO	no	yes	no	no	no
randomized set 3	Q8NC26	ZNF114	no	yes	no	no	no
randomized set 3	Q8TCY5	MRAP	no	yes	no	no	no
randomized set 3	Q9GZZ6	CHRNA10	no	no	yes	no	no
randomized set 3	Q8N371	KDM8	no	no	no	yes	no
randomized set 3	Q2TAK8	PWWP3A	no	yes	no	no	no
randomized set 3	Q7RTV0	PHF5A	no	no	no	no	yes
randomized set 3	P11362	FGFR1	yes	no	yes	yes	yes
randomized set 3	Q8N104	DEFB106A	no	yes	no	no	no
randomized set 3	P61978	HNRNPK	no	no	no	no	yes
randomized set 3	Q6UW56	ATRAID	no	yes	no	no	no
randomized set 3	Q7Z4H8	POGLUT3	no	no	no	yes	no
randomized set 3	O75840	KLF7	yes	no	yes	yes	yes
randomized set 3	P01588	EPO	no	no	no	no	yes
randomized set 3	Q9UBS5	GABBR1	no	no	no	no	yes
randomized set 3	O75937	DNAJC8	no	no	no	no	yes
randomized set 3	P02647	APOA1	no	yes	no	no	no
randomized set 3	Q9Y2Z0	SUGT1	no	no	no	no	yes
randomized set 3	Q9BZQ4	NMNAT2	no	no	no	yes	yes
randomized set 3	P33241	LSP1	no	yes	no	no	no
randomized set 3	Q8N1N5	CRIPAK	no	no	no	no	no
randomized set 3	P27539	GDF1	no	no	no	no	no
randomized set 3	Q9HCU4	CELSR2	no	no	yes	no	yes
randomized set 3	P29317	EPHA2	no	no	yes	no	yes
randomized set 3	Q9NZJ4	SACS	no	yes	no	no	no
randomized set 3	O43353	RIPK2	no	no	yes	no	yes
randomized set 3	Q5JT25	RAB41	no	no	yes	no	no
randomized set 3	Q9BZE1	MRPL37	no	yes	no	no	no
randomized set 3	Q9P0T7	TMEM9	no	no	yes	no	yes
randomized set 3	Q76N89	HECW1	yes	no	yes	yes	yes
randomized set 3	P0DMV9	HSPA1B	no	no	yes	no	no
randomized set 3	Q8N1N2	DYNAP	no	yes	no	no	no
randomized set 3	Q13702	RAPSN	no	no	no	yes	no
randomized set 3	P25440	BRD2	no	no	yes	no	no
randomized set 3	Q9NPG4	PCDH12	no	no	yes	yes	no
randomized set 3	P61960	UFM1	no	yes	no	no	no
randomized set 3	Q9UPI3	FLVCR2	no	no	yes	no	no
randomized set 3	Q71DI3	H3C15	no	no	yes	no	no
randomized set 3	P62316	SNRPD2	no	no	no	no	yes
randomized set 3	O76062	TM7SF2	no	no	yes	yes	no
randomized set 3	Q8WV99	ZFAND2B	no	no	yes	no	no
randomized set 3	P56180	TPTE	no	no	no	no	no
randomized set 3	O00622	CCN1	no	no	yes	yes	no
randomized set 3	O15439	ABCC4	no	no	no	no	yes
randomized set 3	O75689	ADAP1	no	no	no	no	yes
randomized set 3	P23769	GATA2	yes	no	yes	yes	yes
randomized set 3	Q14449	GRB14	no	no	yes	yes	yes
randomized set 3	P07998	RNASE1	no	yes	no	no	no
randomized set 3	P78325	ADAM8	no	no	yes	no	no
randomized set 3	Q9H2J4	PDCL3	no	no	yes	no	no
randomized set 3	A1L4K1	FSD2	no	no	yes	yes	no
randomized set 3	P20783	NTF3	no	no	yes	yes	yes
randomized set 3	Q9NY26	SLC39A1	no	no	yes	no	no
randomized set 3	Q12951	FOXI1	no	no	yes	yes	no
randomized set 3	Q70EL2	USP45	no	no	yes	yes	no
randomized set 3	P48061	CXCL12	no	no	no	yes	no
randomized set 3	Q02487	DSC2	no	no	yes	yes	no
randomized set 3	O00155	GPR25	no	yes	no	no	no
randomized set 3	P13349	MYF5	no	no	yes	yes	yes
randomized set 3	Q8N9B5	JMY	no	no	yes	no	yes
randomized set 3	Q3V6T2	CCDC88A	no	no	yes	no	yes
randomized set 3	O95167	NDUFA3	no	yes	no	no	no
randomized set 3	Q96MF2	STAC3	no	no	yes	yes	yes
randomized set 3	Q5GLZ8	HERC4	yes	no	yes	yes	yes
randomized set 3	Q14142	TRIM14	no	no	no	yes	no
randomized set 4	Q96T49	PPP1R16B	no	no	yes	no	yes
randomized set 4	Q9NQC8	IFT46	no	no	no	no	yes
randomized set 4	Q9UGL1	KDM5B	no	no	yes	yes	yes
randomized set 4	Q96KN8	PLAAT5	no	no	no	yes	no
randomized set 4	Q9Y227	ENTPD4	no	no	yes	yes	no
randomized set 4	Q9NX01	TXNL4B	no	yes	no	no	no
randomized set 4	O75182	SIN3B	yes	no	yes	yes	yes
randomized set 4	Q9UGJ1	TUBGCP4	no	no	no	yes	yes
randomized set 4	Q8TEW0	PARD3	yes	no	yes	yes	yes
randomized set 4	P17858	PFKL	no	no	yes	yes	yes
randomized set 4	Q13829	TNFAIP1	no	no	yes	yes	yes
randomized set 4	O15033	AREL1	no	no	no	yes	yes
randomized set 4	Q8IY92	SLX4	no	no	no	no	yes
randomized set 4	Q9HD89	RETN	no	yes	no	no	no
randomized set 4	Q9UPG8	PLAGL2	no	no	yes	no	yes
randomized set 4	O14798	TNFRSF10C	no	yes	no	no	no
randomized set 4	Q9Y6A1	POMT1	no	no	no	yes	no
randomized set 4	Q96B86	RGMA	no	no	yes	yes	no
randomized set 4	Q9NTX9	FAM217B	no	yes	no	no	no
randomized set 4	Q07092	COL16A1	no	yes	no	no	no
randomized set 4	Q9Y4P1	ATG4B	no	no	no	no	yes
randomized set 4	Q6L8H1	KRTAP5-4	no	no	no	no	no
randomized set 4	O43310	CTIF	no	no	no	yes	yes
randomized set 4	Q9H3L0	MMADHC	no	yes	no	no	no
randomized set 4	O75636	FCN3	no	yes	no	no	no
randomized set 4	Q86YD3	TMEM25	no	yes	no	no	no
randomized set 4	P62945	RPL41	no	yes	no	no	no
randomized set 4	Q9Y303	AMDHD2	no	no	no	yes	no
randomized set 4	P17213	BPI	no	no	yes	yes	no
randomized set 4	O95466	FMNL1	yes	no	yes	yes	yes
randomized set 4	P40879	SLC26A3	no	no	yes	no	no
randomized set 4	Q9H2U9	ADAM7	no	no	yes	yes	no
randomized set 4	O43598	DNPH1	no	yes	no	no	no
randomized set 4	Q9UBK9	UXT	no	no	no	no	yes
randomized set 4	P25713	MT3	no	no	no	yes	no
randomized set 4	Q9NS86	LANCL2	no	no	yes	yes	yes
randomized set 4	Q6ZT62	BARGIN	no	no	no	no	no
randomized set 4	P45379	TNNT2	no	no	yes	yes	yes
randomized set 4	Q7KZN9	COX15	no	no	no	yes	no
randomized set 4	Q6N021	TET2	no	yes	no	no	no
randomized set 4	O15164	TRIM24	no	no	yes	no	yes
randomized set 4	Q86SQ4	ADGRG6	no	no	yes	yes	no
randomized set 4	Q96EM0	L3HYPDH	no	yes	no	no	no
randomized set 4	P49918	CDKN1C	no	no	no	no	yes
randomized set 4	O95863	SNAI1	no	no	yes	no	yes
randomized set 4	Q6P3W2	DNAJC24	no	yes	no	no	no
randomized set 4	Q7Z6L0	PRRT2	no	no	no	yes	no
randomized set 4	P08123	COL1A2	no	no	no	no	yes
randomized set 4	Q6ZMU5	TRIM72	no	no	no	yes	no
randomized set 4	Q2TBE0	CWF19L2	no	no	no	yes	no
randomized set 4	Q8WXE1	ATRIP	no	no	no	no	yes
randomized set 4	Q9H461	FZD8	no	no	yes	no	no
randomized set 4	Q9Y235	APOBEC2	no	yes	no	no	no
randomized set 4	Q96FT7	ASIC4	no	no	yes	yes	yes
randomized set 4	P36897	TGFBR1	no	no	yes	no	yes
randomized set 4	Q99735	MGST2	no	no	yes	yes	no
randomized set 4	Q9BQA1	WDR77	no	no	no	no	yes
randomized set 4	O43760	SYNGR2	no	no	yes	no	no
randomized set 4	Q9NUJ3	TCP11L1	no	no	yes	yes	no
randomized set 4	Q9ULV3	CIZ1	no	no	no	no	no
randomized set 4	Q9BY14	TEX101	no	yes	no	no	no
randomized set 4	Q96GD4	AURKB	no	no	yes	yes	yes
randomized set 4	Q5BJF2	TMEM97	no	yes	no	no	no
randomized set 4	O14917	PCDH17	yes	no	yes	yes	yes
randomized set 4	Q969Z3	MTARC2	no	yes	no	no	no
randomized set 4	O15438	ABCC3	no	no	yes	no	yes
randomized set 4	Q96G28	CFAP36	no	yes	no	no	no
randomized set 4	Q9NWM8	FKBP14	no	no	yes	no	no
randomized set 4	O60934	NBN	no	no	no	no	yes
randomized set 4	Q8TC59	PIWIL2	no	no	no	yes	no
randomized set 4	Q15139	PRKD1	no	no	yes	yes	yes
randomized set 4	O15230	LAMA5	no	no	yes	no	yes
randomized set 4	Q9NRL3	STRN4	yes	no	yes	yes	yes
randomized set 4	Q9NP61	ARFGAP3	no	yes	no	no	no
randomized set 4	Q9NP78	ABCB9	no	no	no	yes	no
randomized set 4	P61353	RPL27	no	no	no	no	yes
randomized set 4	O75771	RAD51D	no	yes	no	no	no
randomized set 4	P49703	ARL4D	no	no	yes	no	yes
randomized set 4	P00750	PLAT	no	no	yes	no	yes
randomized set 4	Q9HAC7	SUGCT	no	yes	no	no	no
randomized set 4	Q6ZVD7	STOX1	no	no	yes	yes	no
randomized set 4	P48549	KCNJ3	no	no	yes	no	yes
randomized set 4	Q86Z02	HIPK1	yes	no	yes	yes	yes
randomized set 4	Q9UBS0	RPS6KB2	no	no	no	no	yes
randomized set 4	Q8IUB9	KRTAP19-1	no	yes	no	no	no
randomized set 4	P41250	GARS1	no	no	no	yes	no
randomized set 4	O60907	TBL1X	no	no	yes	no	yes
randomized set 4	Q9Y277	VDAC3	no	no	yes	no	yes
randomized set 4	P14384	CPM	no	yes	no	no	no
randomized set 5	O95271	TNKS	no	no	yes	yes	yes
randomized set 5	Q96M11	HYLS1	no	no	no	yes	no
randomized set 5	P50542	PEX5	no	no	yes	no	yes
randomized set 5	P43007	SLC1A4	no	no	yes	no	yes
randomized set 5	Q9HCJ0	TNRC6C	no	no	yes	no	yes
randomized set 5	Q6N021	TET2	no	yes	no	no	no
randomized set 5	Q9UN86	G3BP2	no	no	yes	no	yes
randomized set 5	Q8IWT3	CUL9	no	no	no	yes	yes
randomized set 5	Q96CE8	TM4SF18	no	yes	no	no	no
randomized set 5	Q9NQC3	RTN4	no	no	yes	no	no
randomized set 5	O00287	RFXAP	no	yes	no	no	no
randomized set 5	Q15392	DHCR24	no	no	no	yes	yes
randomized set 5	Q5T0T0	MARCHF8	no	no	yes	yes	no
randomized set 5	Q5K651	SAMD9	no	yes	no	no	no
randomized set 5	O60292	SIPA1L3	no	no	yes	no	yes
randomized set 5	P42658	DPP6	yes	no	yes	yes	yes
randomized set 5	Q8N2K1	UBE2J2	no	no	no	no	yes
randomized set 5	Q9NPE2	NGRN	no	yes	no	no	no
randomized set 5	P07476	IVL	no	yes	no	no	no
randomized set 5	Q96SL4	GPX7	no	no	yes	yes	no
randomized set 5	Q04941	PLP2	no	yes	no	no	no
randomized set 5	Q96NY8	NECTIN4	no	no	yes	no	no
randomized set 5	Q15819	UBE2V2	no	yes	no	no	no
randomized set 5	P51787	KCNQ1	no	no	no	no	yes
randomized set 5	Q9BZF3	OSBPL6	yes	no	yes	yes	yes
randomized set 5	Q6ZVD8	PHLPP2	no	no	yes	no	no
randomized set 5	P55774	CCL18	no	no	no	no	no
randomized set 5	A7MCY6	TBKBP1	no	no	no	yes	yes
randomized set 5	Q9Y272	RASD1	no	no	yes	no	yes
randomized set 5	O75832	PSMD10	no	no	no	no	yes
randomized set 5	Q13620	CUL4B	no	no	yes	no	yes
randomized set 5	A8K4G0	CD300LB	no	yes	no	no	no
randomized set 5	Q9H7M9	VSIR	no	no	no	yes	no
randomized set 5	Q13561	DCTN2	no	no	no	no	yes
randomized set 5	Q92968	PEX13	no	no	no	yes	yes
randomized set 5	P98077	SHC2	no	no	yes	no	yes
randomized set 5	P08243	ASNS	no	no	no	yes	yes
randomized set 5	Q9C0K0	BCL11B	yes	no	yes	yes	yes
randomized set 5	Q8NI27	THOC2	no	no	no	no	yes
randomized set 5	Q59EK9	RUNDC3A	yes	no	yes	yes	yes
randomized set 5	Q9UK80	USP21	no	no	yes	yes	yes
randomized set 5	P28068	HLA-DMB	no	yes	no	no	no
randomized set 5	Q12830	BPTF	no	no	no	no	yes
randomized set 5	Q9GZY8	MFF	no	no	no	no	yes
randomized set 5	Q9BSR8	YIPF4	no	no	no	no	yes
randomized set 5	Q96SB8	SMC6	no	no	no	no	yes
randomized set 5	Q14469	HES1	no	no	yes	no	yes
randomized set 5	P28715	ERCC5	no	no	no	yes	yes
randomized set 5	Q9UQQ1	NAALADL1	no	no	yes	yes	no
randomized set 5	Q8NG66	NEK11	no	no	no	yes	no
randomized set 5	P83436	COG7	no	no	no	yes	yes
randomized set 5	Q96PR1	KCNC2	no	no	yes	no	yes
randomized set 5	P54652	HSPA2	no	no	yes	no	no
randomized set 5	Q7RTW8	OTOA	no	no	no	yes	no
randomized set 5	P01033	TIMP1	no	no	yes	no	yes
randomized set 5	P06133	UGT2B4	no	no	yes	no	no
randomized set 5	Q5TA31	RNF187	no	no	no	no	no
randomized set 5	Q8WYB5	KAT6B	no	no	no	yes	yes
randomized set 5	Q96ST2	IWS1	no	no	no	no	yes
randomized set 5	Q9Y4G6	TLN2	no	no	yes	no	yes
randomized set 5	O60282	KIF5C	no	no	yes	yes	yes
randomized set 5	Q9Y6Y8	SEC23IP	no	no	yes	yes	no
randomized set 5	O60565	GREM1	no	no	yes	no	yes
randomized set 5	Q9UM63	PLAGL1	no	no	yes	yes	no
randomized set 5	Q8NCN4	RNF169	no	yes	no	no	no
randomized set 5	O60264	SMARCA5	no	no	yes	no	yes
randomized set 5	Q92781	RDH5	no	no	yes	no	no
randomized set 5	Q9GZZ6	CHRNA10	no	no	yes	no	no
randomized set 5	O43613	HCRTR1	no	no	yes	yes	yes
randomized set 5	Q8NB59	SYT14	yes	no	yes	yes	yes
randomized set 5	Q30201	HFE	no	yes	no	no	no
randomized set 5	Q9BZW8	CD244	no	no	no	yes	no
randomized set 5	Q9H175	CSRNP2	no	no	yes	no	yes
randomized set 5	Q8N8B7	TCEANC	no	yes	no	no	no
randomized set 5	Q8NHQ1	CEP70	no	no	no	yes	no
randomized set 5	P16473	TSHR	no	no	yes	yes	yes
randomized set 5	Q00577	PURA	no	no	yes	no	yes
randomized set 5	Q15413	RYR3	no	no	yes	no	no
randomized set 5	Q8TAP9	MPLKIP	no	yes	no	no	no
randomized set 5	Q9NYK6	EURL	no	no	no	yes	no
randomized set 5	Q8NHS3	MFSD8	no	no	no	yes	no
randomized set 5	O00451	GFRA2	no	no	yes	no	no
randomized set 5	Q8TED9	AFAP1L1	no	no	yes	yes	no
randomized set 5	Q9ULV8	CBLC	no	no	yes	no	no
randomized set 5	O00422	SAP18	no	no	no	no	yes
randomized set 5	P51816	AFF2	no	no	yes	no	yes
randomized set 5	Q6PIU1	KCNV1	no	no	yes	yes	yes
randomized set 5	C4AMC7	WASH3P	no	no	no	no	no
randomized set 5	P21953	BCKDHB	no	no	no	yes	no
randomized set 6	O00499	BIN1	no	no	yes	no	yes
randomized set 6	G2XKQ0	SUMO1P1	no	no	no	no	no
randomized set 6	P32926	DSG3	no	no	yes	yes	no
randomized set 6	Q92905	COPS5	no	no	no	no	yes
randomized set 6	P51677	CCR3	no	no	yes	no	no
randomized set 6	P43681	CHRNA4	no	no	yes	no	yes
randomized set 6	P49447	CYB561	no	no	yes	no	no
randomized set 6	Q96QE5	TEFM	no	no	no	yes	no
randomized set 6	Q86WV5	TEN1	no	no	no	yes	no
randomized set 6	Q6P1J6	PLB1	no	no	no	yes	no
randomized set 6	Q13829	TNFAIP1	no	no	yes	yes	yes
randomized set 6	Q8IZY2	ABCA7	no	no	yes	no	no
randomized set 6	Q8WVB3	HEXD	no	no	no	yes	no
randomized set 6	Q8IU57	IFNLR1	no	yes	no	no	no
randomized set 6	Q9UIX4	KCNG1	no	no	yes	yes	yes
randomized set 6	Q13136	PPFIA1	no	no	yes	no	yes
randomized set 6	P34910	EVI2B	no	no	no	yes	no
randomized set 6	Q6UWP2	DHRS11	no	no	no	no	no
randomized set 6	P85298	ARHGAP8	no	no	no	no	no
randomized set 6	Q9BUN8	DERL1	no	no	no	yes	yes
randomized set 6	Q9NXC5	MIOS	no	yes	no	no	no
randomized set 6	Q8WZA1	POMGNT1	no	no	no	yes	no
randomized set 6	P01298	PPY	no	no	no	no	no
randomized set 6	P50151	GNG10	no	yes	no	no	no
randomized set 6	Q8IYX7	SAXO1	no	no	yes	no	no
randomized set 6	Q8NDN9	RCBTB1	no	no	no	yes	no
randomized set 6	Q14703	MBTPS1	no	no	no	yes	no
randomized set 6	Q02040	AKAP17A	no	no	yes	no	no
randomized set 6	P98164	LRP2	no	no	yes	no	yes
randomized set 6	P00326	ADH1C	no	no	no	no	no
randomized set 6	Q86UW1	SLC51A	no	no	no	yes	yes
randomized set 6	Q9UJD0	RIMS3	no	no	yes	no	no
randomized set 6	Q02487	DSC2	no	no	yes	yes	no
randomized set 6	O15360	FANCA	no	no	no	yes	yes
randomized set 6	Q96E14	RMI2	no	no	no	no	yes
randomized set 6	O15427	SLC16A3	no	no	yes	yes	yes
randomized set 6	Q6ZQN7	SLCO4C1	no	no	no	yes	no
randomized set 6	Q8N987	NECAB1	no	no	yes	no	yes
randomized set 6	Q9HD33	MRPL47	no	no	no	no	yes
randomized set 6	Q7Z403	TMC6	no	no	yes	no	no
randomized set 6	Q99877	H2BC15	no	yes	no	no	no
randomized set 6	Q9HDC9	APMAP	no	yes	no	no	no
randomized set 6	Q9NQ75	CASS4	no	no	yes	yes	no
randomized set 6	Q6DKI7	PVRIG	no	yes	no	no	no
randomized set 6	Q9BZW7	TSGA10	no	no	yes	no	no
randomized set 6	Q9NVF9	ETNK2	no	no	yes	yes	no
randomized set 6	P22061	PCMT1	no	no	no	no	yes
randomized set 6	Q01959	SLC6A3	no	no	yes	no	yes
randomized set 6	Q15742	NAB2	no	no	yes	no	yes
randomized set 6	Q9UPQ7	PDZRN3	yes	no	yes	yes	yes
randomized set 6	Q96BK5	PINX1	no	yes	no	no	no
randomized set 6	P25325	MPST	no	no	no	yes	no
randomized set 6	Q99593	TBX5	yes	no	yes	yes	yes
randomized set 6	Q8IZC6	COL27A1	no	no	yes	no	yes
randomized set 6	Q96ST2	IWS1	no	no	no	no	yes
randomized set 6	Q9H479	FN3K	no	no	no	yes	no
randomized set 6	Q14542	SLC29A2	no	no	yes	no	no
randomized set 6	Q63ZY3	KANK2	no	no	yes	no	no
randomized set 6	Q68CP4	HGSNAT	no	yes	no	no	no
randomized set 6	P49910	ZNF165	no	yes	no	no	no
randomized set 6	Q13239	SLA	no	no	yes	no	yes
randomized set 6	Q8TEX9	IPO4	no	no	no	yes	yes
randomized set 6	P19013	KRT4	no	no	yes	no	no
randomized set 6	Q92841	DDX17	no	no	yes	no	no
randomized set 6	Q9NQR4	NIT2	no	no	no	yes	no
randomized set 6	Q15119	PDK2	no	no	yes	yes	yes
randomized set 6	Q6PIW4	FIGNL1	no	no	yes	yes	no
randomized set 6	O95996	APC2	no	no	yes	no	yes
randomized set 6	Q6T4R5	NHS	no	no	no	yes	yes
randomized set 6	P11474	ESRRA	no	no	yes	no	yes
randomized set 6	Q9BVV2	FNDC11	no	yes	no	no	no
randomized set 6	Q9H3D4	TP63	yes	no	yes	yes	yes
randomized set 6	P01100	FOS	no	no	yes	yes	yes
randomized set 6	Q9H7Z6	KAT8	yes	no	yes	yes	yes
randomized set 6	Q68DK7	MSL1	no	no	no	yes	yes
randomized set 6	Q9Y605	MRFAP1	no	no	no	no	yes
randomized set 6	Q9BRQ6	CHCHD6	no	no	yes	no	no
randomized set 6	Q9BVC3	DSCC1	no	no	no	yes	yes
randomized set 6	Q9H816	DCLRE1B	no	no	yes	yes	yes
randomized set 6	Q96IK1	BOD1	no	yes	no	no	no
randomized set 6	O95971	CD160	no	yes	no	no	no
randomized set 6	Q9ULZ3	PYCARD	no	no	no	yes	no
randomized set 6	P41229	KDM5C	no	no	yes	yes	yes
randomized set 6	Q9H1P3	OSBPL2	no	no	yes	no	yes
randomized set 6	Q96LR5	UBE2E2	no	no	no	no	yes
randomized set 6	Q9Y3D8	AK6	no	yes	no	no	no
randomized set 6	P02724	GYPA	no	yes	no	no	no
randomized set 6	P52657	GTF2A2	no	no	no	yes	yes
randomized set 6	P51570	GALK1	no	yes	no	no	no
randomized set 7	O43741	PRKAB2	no	no	no	yes	yes
randomized set 7	Q9NSV4	DIAPH3	no	no	yes	no	yes
randomized set 7	Q9BXI6	TBC1D10A	no	no	yes	no	yes
randomized set 7	P40145	ADCY8	no	no	yes	no	yes
randomized set 7	O00142	TK2	no	yes	no	no	no
randomized set 7	Q6Y288	B3GLCT	no	no	no	yes	no
randomized set 7	Q9UNE7	STUB1	no	no	no	no	yes
randomized set 7	P29034	S100A2	no	yes	no	no	no
randomized set 7	Q9BTV5	FSD1	no	no	yes	yes	yes
randomized set 7	Q96PB7	OLFM3	no	no	yes	yes	no
randomized set 7	P35548	MSX2	no	no	yes	no	yes
randomized set 7	Q92769	HDAC2	yes	no	yes	yes	yes
randomized set 7	Q9UKR5	ERG28	no	no	no	no	no
randomized set 7	Q15256	PTPRR	no	no	yes	yes	yes
randomized set 7	Q9BXN1	ASPN	no	no	yes	no	no
randomized set 7	Q13972	RASGRF1	yes	no	yes	yes	yes
randomized set 7	Q02505	MUC3A	no	no	no	no	no
randomized set 7	Q9NRD9	DUOX1	no	no	no	yes	yes
randomized set 7	Q8TB24	RIN3	no	no	yes	no	yes
randomized set 7	Q8IUN9	CLEC10A	no	yes	no	no	no
randomized set 7	Q9H3N8	HRH4	no	no	yes	yes	no
randomized set 7	Q96L73	NSD1	no	no	yes	yes	yes
randomized set 7	P0DI83	RAB34	no	no	yes	no	no
randomized set 7	Q15413	RYR3	no	no	yes	no	no
randomized set 7	P08697	SERPINF2	no	no	yes	yes	yes
randomized set 7	P22004	BMP6	no	no	yes	yes	yes
randomized set 7	Q9GZZ9	UBA5	no	no	no	yes	yes
randomized set 7	Q9UN81	L1RE1	no	no	no	no	no
randomized set 7	P17028	ZNF24	no	no	no	yes	yes
randomized set 7	P31153	MAT2A	no	no	yes	no	yes
randomized set 7	Q16667	CDKN3	no	no	no	no	yes
randomized set 7	Q8N7E2	CBLL2	no	no	yes	no	no
randomized set 7	O43548	TGM5	no	no	yes	yes	no
randomized set 7	Q6PEY2	TUBA3E	no	yes	no	no	no
randomized set 7	Q9H6B4	CLMP	no	no	yes	yes	no
randomized set 7	Q96E17	RAB3C	no	no	yes	yes	yes
randomized set 7	P52907	CAPZA1	no	no	yes	no	yes
randomized set 7	Q92954	PRG4	no	yes	no	no	no
randomized set 7	P35711	SOX5	no	no	yes	no	yes
randomized set 7	P63000	RAC1	no	no	yes	no	yes
randomized set 7	Q07687	DLX2	no	no	yes	no	yes
randomized set 7	Q9HCC0	MCCC2	no	yes	no	no	no
randomized set 7	A8MTA8	FAM166B	no	no	no	yes	no
randomized set 7	O14978	ZNF263	no	no	no	yes	no
randomized set 7	Q14117	DPYS	no	no	yes	yes	yes
randomized set 7	Q8TB92	HMGCLL1	no	no	yes	yes	no
randomized set 7	P08603	CFH	no	no	no	no	yes
randomized set 7	Q96P71	NECAB3	no	no	yes	yes	yes
randomized set 7	Q16552	IL17A	no	yes	no	no	no
randomized set 7	Q9H1H9	KIF13A	no	no	no	no	yes
randomized set 7	P20930	FLG	no	no	no	no	no
randomized set 7	Q9NZD2	GLTP	no	no	yes	yes	yes
randomized set 7	Q9Y2X0	MED16	no	no	no	no	yes
randomized set 7	Q13835	PKP1	no	no	yes	no	yes
randomized set 7	P57086	SCAND1	no	yes	no	no	no
randomized set 7	Q9UI36	DACH1	no	no	no	no	yes
randomized set 7	P23468	PTPRD	no	no	yes	no	yes
randomized set 7	Q9UBC2	EPS15L1	yes	no	yes	yes	yes
randomized set 7	Q9NRR4	DROSHA	no	no	no	no	yes
randomized set 7	P10997	IAPP	no	yes	no	no	no
randomized set 7	Q8IVH8	MAP4K3	no	no	no	no	yes
randomized set 7	P52657	GTF2A2	no	no	no	yes	yes
randomized set 7	Q6ZMR5	TMPRSS11A	no	no	no	yes	no
randomized set 7	O95782	AP2A1	no	no	yes	no	yes
randomized set 7	P23511	NFYA	no	no	no	no	yes
randomized set 7	O95433	AHSA1	no	no	yes	no	yes
randomized set 7	P49959	MRE11	no	no	no	yes	no
randomized set 7	Q9Y4L5	RNF115	no	yes	no	no	no
randomized set 7	P0DPK2	H3Y1	no	no	no	no	no
randomized set 7	P09017	HOXC4	no	no	yes	no	yes
randomized set 7	Q86SU0	ILDR1	no	no	no	yes	no
randomized set 7	Q6PHR2	ULK3	no	no	no	yes	no
randomized set 7	Q9UH03	SEPTIN3	no	no	yes	no	no
randomized set 7	P53539	FOSB	no	no	yes	no	yes
randomized set 7	Q02577	NHLH2	no	no	no	no	yes
randomized set 7	Q9NY64	SLC2A8	no	no	yes	no	yes
randomized set 7	Q8WWZ1	IL1F10	no	yes	no	no	no
randomized set 7	Q8WVX9	FAR1	no	no	yes	no	yes
randomized set 7	Q8IXJ6	SIRT2	no	no	no	yes	yes
randomized set 7	Q9Y5X5	NPFFR2	no	no	yes	yes	no
randomized set 7	Q99081	TCF12	no	no	yes	no	yes
randomized set 7	Q9H6R6	ZDHHC6	no	yes	no	no	no
randomized set 7	Q96FX8	PERP	no	no	no	no	yes
randomized set 7	Q15544	TAF11	no	no	no	no	yes
randomized set 7	P52292	KPNA2	no	no	yes	no	yes
randomized set 7	P53396	ACLY	no	no	no	no	yes
randomized set 7	O43678	NDUFA2	no	yes	no	no	no
randomized set 7	Q9H4I9	SMDT1	no	yes	no	no	no
randomized set 7	Q96LI5	CNOT6L	no	no	yes	no	yes
randomized set 8	P07478	PRSS2	no	no	no	no	no
randomized set 8	Q96CP6	GRAMD1A	no	no	yes	yes	yes
randomized set 8	Q96CQ1	SLC25A36	no	no	yes	no	yes
randomized set 8	Q00341	HDLBP	no	no	no	yes	yes
randomized set 8	P51692	STAT5B	no	no	yes	no	yes
randomized set 8	Q9NPA2	MMP25	no	no	yes	no	no
randomized set 8	P01148	GNRH1	no	no	no	yes	no
randomized set 8	Q8TCG2	PI4K2B	no	no	yes	no	yes
randomized set 8	Q9H845	ACAD9	no	no	no	yes	no
randomized set 8	O14494	PLPP1	no	no	yes	yes	no
randomized set 8	Q8N0W3	FCSK	no	no	no	yes	no
randomized set 8	P06340	HLA-DOA	no	yes	no	no	no
randomized set 8	Q15811	ITSN1	no	no	no	no	yes
randomized set 8	Q9NV96	TMEM30A	no	no	yes	no	yes
randomized set 8	Q9BX68	HINT2	no	yes	no	no	no
randomized set 8	A1KZ92	PXDNL	no	yes	no	no	no
randomized set 8	Q9Y2Q0	ATP8A1	no	no	yes	no	yes
randomized set 8	Q99677	LPAR4	no	no	yes	no	no
randomized set 8	O15444	CCL25	no	yes	no	no	no
randomized set 8	P55789	GFER	no	yes	no	no	no
randomized set 8	Q96JA1	LRIG1	no	no	yes	yes	yes
randomized set 8	Q15633	TARBP2	no	no	yes	yes	yes
randomized set 8	Q9UHB9	SRP68	no	no	no	no	yes
randomized set 8	P15848	ARSB	no	no	yes	no	yes
randomized set 8	Q9Y620	RAD54B	no	no	no	yes	yes
randomized set 8	P82987	ADAMTSL3	no	yes	no	no	no
randomized set 8	Q9BSI4	TINF2	no	no	no	no	yes
randomized set 8	Q96RS0	TGS1	no	no	no	no	yes
randomized set 8	Q8TBE0	BAHD1	no	no	no	no	yes
randomized set 8	P62341	SELENOT	no	yes	no	no	no
randomized set 8	Q8TAP6	CEP76	no	no	no	yes	yes
randomized set 8	Q3LI59	KRTAP21-2	no	yes	no	no	no
randomized set 8	P35813	PPM1A	no	no	yes	no	yes
randomized set 8	Q16558	KCNMB1	no	no	no	yes	no
randomized set 8	Q96EG3	ZNF837	no	yes	no	no	no
randomized set 8	P14415	ATP1B2	no	no	yes	yes	yes
randomized set 8	Q86WG5	SBF2	no	no	yes	no	no
randomized set 8	O43679	LDB2	yes	no	yes	yes	yes
randomized set 8	P55209	NAP1L1	no	no	yes	no	yes
randomized set 8	O75410	TACC1	no	no	no	yes	yes
randomized set 8	Q7Z2H8	SLC36A1	no	no	yes	yes	no
randomized set 8	O43676	NDUFB3	no	yes	no	no	no
randomized set 8	P19021	PAM	no	no	no	yes	yes
randomized set 8	Q8IVH8	MAP4K3	no	no	no	no	yes
randomized set 8	Q9Y4L5	RNF115	no	yes	no	no	no
randomized set 8	Q9BYG3	NIFK	no	no	no	no	yes
randomized set 8	Q08ET2	SIGLEC14	no	yes	no	no	no
randomized set 8	Q14181	POLA2	no	no	no	yes	yes
randomized set 8	Q8WVE7	TMEM170A	no	no	yes	no	no
randomized set 8	P19235	EPOR	no	no	no	no	yes
randomized set 8	P05060	CHGB	no	no	no	yes	no
randomized set 8	P28370	SMARCA1	no	no	yes	no	yes
randomized set 8	Q9UNL4	ING4	no	no	yes	no	yes
randomized set 8	P43155	CRAT	no	yes	no	no	no
randomized set 8	Q9H0U6	MRPL18	no	no	no	no	no
randomized set 8	Q8TDP1	RNASEH2C	no	no	no	no	no
randomized set 8	Q99675	CGRRF1	no	yes	no	no	no
randomized set 8	Q9BTK6	PAGR1	no	no	no	no	no
randomized set 8	Q9H9G7	AGO3	no	no	yes	no	yes
randomized set 8	Q03181	PPARD	yes	no	yes	yes	yes
randomized set 8	Q9NYQ8	FAT2	no	no	yes	yes	no
randomized set 8	Q96PE3	INPP4A	yes	no	yes	yes	yes
randomized set 8	Q9HCJ0	TNRC6C	no	no	yes	no	yes
randomized set 8	O14640	DVL1	no	no	yes	no	yes
randomized set 8	P53674	CRYBB1	no	no	yes	yes	no
randomized set 8	Q6PEW1	ZCCHC12	no	yes	no	no	no
randomized set 8	Q92793	CREBBP	yes	no	yes	yes	yes
randomized set 8	O95073	FSBP	no	no	no	no	no
randomized set 8	O60313	OPA1	no	no	no	no	yes
randomized set 8	P36021	SLC16A2	no	no	yes	no	yes
randomized set 8	P31946	YWHAB	yes	no	yes	yes	yes
randomized set 8	Q6ISU1	PTCRA	no	no	no	yes	no
randomized set 8	P08603	CFH	no	no	no	no	yes
randomized set 8	Q8WWB5	PIH1D2	no	no	no	yes	no
randomized set 8	Q04724	TLE1	yes	no	yes	yes	yes
randomized set 8	Q9UHX1	PUF60	no	no	no	yes	yes
randomized set 8	P10145	CXCL8	no	yes	no	no	no
randomized set 8	Q9HBE5	IL21R	no	no	no	no	yes
randomized set 8	Q9BX67	JAM3	no	no	yes	yes	yes
randomized set 8	Q13316	DMP1	no	no	no	yes	no
randomized set 8	P51800	CLCNKA	no	no	yes	no	no
randomized set 8	O14764	GABRD	no	no	no	yes	yes
randomized set 8	A8K0Z3	WASHC1	no	no	no	no	no
randomized set 8	P55017	SLC12A3	no	yes	no	no	no
randomized set 8	Q8N183	NDUFAF2	no	yes	no	no	no
randomized set 8	Q8WU17	RNF139	no	no	yes	no	yes
randomized set 8	Q969T9	WBP2	no	no	yes	no	yes
randomized set 8	O15056	SYNJ2	no	no	yes	no	yes
randomized set 8	P20594	NPR2	no	no	yes	no	yes
randomized set 9	P05106	ITGB3	no	yes	no	no	no
randomized set 9	P01817	IGHV2-5	no	no	no	no	no
randomized set 9	Q2TAC2	CCDC57	no	no	no	yes	no
randomized set 9	Q5VW38	GPR107	no	no	yes	yes	no
randomized set 9	Q86XK2	FBXO11	no	no	no	no	yes
randomized set 9	Q9BTY2	FUCA2	no	no	yes	no	no
randomized set 9	Q9BYR8	KRTAP3-1	no	yes	no	no	no
randomized set 9	Q9Y3Q4	HCN4	no	no	yes	yes	yes
randomized set 9	O75030	MITF	yes	no	yes	yes	yes
randomized set 9	O43296	ZNF264	no	yes	no	no	no
randomized set 9	Q15637	SF1	no	no	no	yes	yes
randomized set 9	O75444	MAF	no	no	yes	no	yes
randomized set 9	Q8NFY9	KBTBD8	no	no	no	yes	no
randomized set 9	Q8NFT8	DNER	no	no	no	yes	yes
randomized set 9	P28482	MAPK1	yes	no	yes	yes	yes
randomized set 9	Q8N157	AHI1	no	no	no	yes	no
randomized set 9	Q4KMQ2	ANO6	no	no	yes	yes	no
randomized set 9	Q14953	KIR2DS5	no	no	no	no	no
randomized set 9	O95859	TSPAN12	no	no	no	yes	yes
randomized set 9	Q96RR1	TWNK	no	no	no	yes	yes
randomized set 9	O95665	NTSR2	no	no	yes	yes	no
randomized set 9	O60942	RNGTT	no	no	no	no	yes
randomized set 9	P78346	RPP30	no	no	no	yes	no
randomized set 9	Q8N9L9	ACOT4	no	yes	no	no	no
randomized set 9	Q9NX40	OCIAD1	no	no	no	yes	no
randomized set 9	Q15113	PCOLCE	no	no	yes	no	yes
randomized set 9	Q8NEA9	GMCL2	no	no	no	no	no
randomized set 9	Q03164	KMT2A	no	no	no	no	yes
randomized set 9	P20810	CAST	no	no	no	yes	no
randomized set 9	Q9BRF8	CPPED1	no	yes	no	no	no
randomized set 9	Q7Z6J6	FRMD5	yes	no	yes	yes	yes
randomized set 9	Q8IVE3	PLEKHH2	no	no	yes	no	no
randomized set 9	P49790	NUP153	no	no	no	yes	yes
randomized set 9	Q6SZW1	SARM1	no	yes	no	no	no
randomized set 9	Q8IX05	CD302	no	yes	no	no	no
randomized set 9	Q12965	MYO1E	no	no	yes	yes	yes
randomized set 9	P01903	HLA-DRA	no	yes	no	no	no
randomized set 9	P07498	CSN3	no	no	no	yes	no
randomized set 9	P51159	RAB27A	no	no	yes	no	yes
randomized set 9	P05771	PRKCB	yes	no	yes	yes	yes
randomized set 9	Q9NQG1	MANBAL	no	yes	no	no	no
randomized set 9	Q9NP55	BPIFA1	no	yes	no	no	no
randomized set 9	Q8WVP7	LMBR1	no	no	yes	no	no
randomized set 9	Q8NI27	THOC2	no	no	no	no	yes
randomized set 9	Q96QA5	GSDMA	no	yes	no	no	no
randomized set 9	Q9H6B4	CLMP	no	no	yes	yes	no
randomized set 9	Q96JK9	MAML3	no	no	yes	yes	no
randomized set 9	Q99447	PCYT2	no	no	no	no	yes
randomized set 9	Q6ZVK8	NUDT18	no	no	no	no	no
randomized set 9	Q96C36	PYCR2	no	yes	no	no	no
randomized set 9	P24593	IGFBP5	no	no	yes	no	yes
randomized set 9	P35611	ADD1	no	no	yes	yes	yes
randomized set 9	P54845	NRL	no	no	yes	no	no
randomized set 9	Q8WVB6	CHTF18	no	no	no	no	no
randomized set 9	Q86U28	ISCA2	no	yes	no	no	no
randomized set 9	Q9NST1	PNPLA3	no	yes	no	no	no
randomized set 9	P98082	DAB2	yes	no	yes	yes	yes
randomized set 9	P60763	RAC3	no	no	yes	no	yes
randomized set 9	O95475	SIX6	no	no	yes	yes	yes
randomized set 9	Q5VTR2	RNF20	no	no	yes	yes	yes
randomized set 9	Q8IZJ1	UNC5B	no	no	yes	yes	yes
randomized set 9	Q08345	DDR1	no	no	yes	yes	yes
randomized set 9	Q76EJ3	SLC35D2	no	no	yes	no	no
randomized set 9	Q9H2X6	HIPK2	no	no	yes	no	yes
randomized set 9	O75643	SNRNP200	no	no	no	no	yes
randomized set 9	Q8NAG6	ANKLE1	no	yes	no	no	no
randomized set 9	O15162	PLSCR1	no	no	yes	no	yes
randomized set 9	P63165	SUMO1	no	no	no	no	yes
randomized set 9	Q32MQ0	ZNF750	no	no	no	yes	no
randomized set 9	P55064	AQP5	no	no	yes	no	no
randomized set 9	Q5QJE6	DNTTIP2	no	no	no	yes	yes
randomized set 9	P05413	FABP3	no	no	yes	no	no
randomized set 9	P16885	PLCG2	no	no	yes	no	yes
randomized set 9	P34059	GALNS	no	no	yes	yes	no
randomized set 9	P50406	HTR6	no	no	no	yes	no
randomized set 9	Q99877	H2BC15	no	yes	no	no	no
randomized set 9	P69892	HBG2	no	yes	no	no	no
randomized set 9	O75448	MED24	no	no	no	no	yes
randomized set 9	O15294	OGT	no	no	no	no	yes
randomized set 9	P98174	FGD1	no	no	yes	no	yes
randomized set 9	A6NGQ2	OOEP	no	yes	no	no	no
randomized set 9	Q9NUU6	OTULINL	no	no	no	yes	no
randomized set 9	P34096	RNASE4	no	yes	no	no	no
randomized set 9	P53602	MVD	no	yes	no	no	no
randomized set 9	P31948	STIP1	no	no	no	no	yes
randomized set 9	P60508	ERVFRD-1	no	yes	no	no	no
randomized set 9	P21145	MAL	no	no	no	no	no
randomized set 9	Q9UKA1	FBXL5	no	no	no	yes	yes
randomized set 9	Q75T13	PGAP1	no	yes	no	no	no
randomized set 10	Q8NI27	THOC2	no	no	no	no	yes
randomized set 10	Q96MM7	HS6ST2	no	no	yes	no	no
randomized set 10	O60603	TLR2	no	no	yes	yes	no
randomized set 10	Q9UI14	RABAC1	no	no	no	yes	yes
randomized set 10	Q8TDW0	LRRC8C	no	no	yes	yes	yes
randomized set 10	Q92804	TAF15	no	yes	no	no	no
randomized set 10	Q96SL4	GPX7	no	no	yes	yes	no
randomized set 10	Q5VWT5	FYB2	no	no	no	yes	no
randomized set 10	Q8NFX7	STXBP6	no	no	no	yes	yes
randomized set 10	O96008	TOMM40	yes	no	yes	yes	yes
randomized set 10	Q14CZ7	FASTKD3	no	no	no	yes	no
randomized set 10	Q16763	UBE2S	no	no	no	no	yes
randomized set 10	Q9BWC9	CCDC106	no	no	no	no	yes
randomized set 10	Q8NBF1	GLIS1	no	no	no	yes	yes
randomized set 10	Q8IWU2	LMTK2	yes	no	yes	yes	yes
randomized set 10	Q2VWA4	SKOR2	no	no	no	no	yes
randomized set 10	Q9HB71	CACYBP	no	no	no	no	yes
randomized set 10	P22061	PCMT1	no	no	no	no	yes
randomized set 10	P63241	EIF5A	no	no	no	no	yes
randomized set 10	Q969U6	FBXW5	no	no	no	no	yes
randomized set 10	Q00G26	PLIN5	no	no	yes	no	no
randomized set 10	Q13153	PAK1	no	no	yes	yes	yes
randomized set 10	O14734	ACOT8	no	no	no	yes	no
randomized set 10	Q8WVT3	TRAPPC12	no	no	no	yes	no
randomized set 10	P84077	ARF1	no	no	yes	no	yes
randomized set 10	Q9H6W3	RIOX1	no	no	no	no	no
randomized set 10	Q06546	GABPA	no	no	no	no	yes
randomized set 10	Q07687	DLX2	no	no	yes	no	yes
randomized set 10	P06727	APOA4	no	no	no	yes	no
randomized set 10	P04746	AMY2A	no	yes	no	no	no
randomized set 10	Q96JJ3	ELMO2	no	no	yes	yes	yes
randomized set 10	Q9NZD4	AHSP	no	yes	no	no	no
randomized set 10	Q9Y692	GMEB1	no	no	yes	no	yes
randomized set 10	Q15847	ADIRF	no	yes	no	no	no
randomized set 10	Q8IZA0	KIAA0319L	no	no	yes	no	no
randomized set 10	Q7Z434	MAVS	no	no	no	yes	yes
randomized set 10	Q14314	FGL2	no	no	no	yes	no
randomized set 10	Q13435	SF3B2	no	no	no	yes	yes
randomized set 10	O00622	CCN1	no	no	yes	yes	no
randomized set 10	Q14644	RASA3	no	no	yes	yes	yes
randomized set 10	Q56P42	PYDC2	no	yes	no	no	no
randomized set 10	Q15111	PLCL1	no	no	yes	yes	yes
randomized set 10	P15169	CPN1	no	no	yes	no	no
randomized set 10	Q86YN6	PPARGC1B	no	no	no	yes	yes
randomized set 10	Q9C0J1	B3GNT4	no	no	yes	no	no
randomized set 10	Q86VF7	NRAP	no	no	yes	yes	yes
randomized set 10	P62081	RPS7	no	no	no	no	yes
randomized set 10	P56381	ATP5F1E	no	yes	no	no	no
randomized set 10	O95672	ECEL1	no	no	yes	yes	yes
randomized set 10	Q9ULB1	NRXN1	no	no	yes	no	yes
randomized set 10	Q9H444	CHMP4B	no	no	yes	yes	yes
randomized set 10	Q96JP5	ZFP91	no	no	no	no	yes
randomized set 10	P49591	SARS1	no	no	no	no	yes
randomized set 10	P51610	HCFC1	no	no	no	yes	yes
randomized set 10	Q9UJX3	ANAPC7	no	no	no	yes	yes
randomized set 10	Q13214	SEMA3B	no	no	yes	no	no
randomized set 10	P02461	COL3A1	no	no	no	yes	yes
randomized set 10	Q16512	PKN1	no	no	yes	no	yes
randomized set 10	Q8N1F7	NUP93	no	no	no	no	yes
randomized set 10	P25787	PSMA2	no	no	no	no	yes
randomized set 10	Q99500	S1PR3	no	no	yes	yes	yes
randomized set 10	Q9UBL3	ASH2L	no	no	no	yes	yes
randomized set 10	P61221	ABCE1	no	no	no	no	yes
randomized set 10	Q9ULX5	RNF112	no	yes	no	no	no
randomized set 10	Q969T4	UBE2E3	no	no	no	no	yes
randomized set 10	Q9H977	WDR54	no	yes	no	no	no
randomized set 10	Q9NYJ8	TAB2	yes	no	yes	yes	yes
randomized set 10	P21453	S1PR1	no	no	yes	yes	yes
randomized set 10	Q8NC01	CLEC1A	no	yes	no	no	no
randomized set 10	Q9HB03	ELOVL3	no	no	yes	yes	no
randomized set 10	P00519	ABL1	no	no	yes	no	yes
randomized set 10	P61081	UBE2M	no	no	no	no	yes
randomized set 10	Q9BPV8	P2RY13	no	yes	no	no	no
randomized set 10	Q9UGL1	KDM5B	no	no	yes	yes	yes
randomized set 10	O43422	THAP12	no	no	no	no	yes
randomized set 10	O00213	APBB1	yes	no	yes	yes	yes
randomized set 10	Q9NNW5	WDR6	no	no	no	yes	no
randomized set 10	Q8N841	TTLL6	no	no	no	yes	no
randomized set 10	Q92844	TANK	no	no	no	yes	yes
randomized set 10	P35527	KRT9	no	no	yes	no	no
randomized set 10	P05305	EDN1	no	no	no	yes	no
randomized set 10	O60930	RNASEH1	no	no	no	yes	no
randomized set 10	P84103	SRSF3	no	no	no	no	yes
randomized set 10	Q86W74	ANKRD46	no	no	no	yes	yes
randomized set 10	P24311	COX7B	no	no	no	no	no
randomized set 10	Q8IZL2	MAML2	no	no	no	no	yes
randomized set 10	Q92496	CFHR4	no	yes	no	no	no
randomized set 10	Q6ZN44	UNC5A	yes	no	yes	yes	yes
randomized set 10	Q9UBQ5	EIF3K	no	no	no	yes	yes
randomized set 11	Q8WVB6	CHTF18	no	no	no	no	no
randomized set 11	Q13115	DUSP4	no	no	yes	yes	yes
randomized set 11	Q96JP0	FEM1C	no	no	yes	yes	yes
randomized set 11	Q96BZ9	TBC1D20	no	no	no	yes	yes
randomized set 11	Q9H2E6	SEMA6A	yes	no	yes	yes	yes
randomized set 11	P29803	PDHA2	no	yes	no	no	no
randomized set 11	P30740	SERPINB1	no	no	yes	no	no
randomized set 11	P17661	DES	no	no	yes	yes	yes
randomized set 11	Q9NPF7	IL23A	no	no	no	no	no
randomized set 11	P62324	BTG1	no	no	yes	no	yes
randomized set 11	Q8TB92	HMGCLL1	no	no	yes	yes	no
randomized set 11	Q92597	NDRG1	no	no	yes	yes	yes
randomized set 11	Q8N144	GJD3	no	no	yes	no	no
randomized set 11	Q9NRR8	CDC42SE1	no	no	no	yes	no
randomized set 11	Q53H47	SETMAR	no	no	no	no	yes
randomized set 11	Q16644	MAPKAPK3	no	no	yes	yes	yes
randomized set 11	Q9Y4A8	NFE2L3	no	no	yes	yes	no
randomized set 11	O75150	RNF40	yes	no	yes	yes	yes
randomized set 11	Q9Y2D2	SLC35A3	no	no	yes	no	no
randomized set 11	P07199	CENPB	no	no	no	no	yes
randomized set 11	Q5H9S7	DCAF17	no	no	no	yes	yes
randomized set 11	Q9UFW8	CGGBP1	no	no	no	no	yes
randomized set 11	P62306	SNRPF	no	no	no	yes	yes
randomized set 11	Q92665	MRPS31	no	yes	no	no	no
randomized set 11	Q9BPZ7	MAPKAP1	no	no	no	no	yes
randomized set 11	Q96BY9	SARAF	no	no	no	yes	no
randomized set 11	Q9Y5Q8	GTF3C5	no	no	no	yes	yes
randomized set 11	P22748	CA4	no	yes	no	no	no
randomized set 11	Q15465	SHH	no	no	yes	no	yes
randomized set 11	Q99878	H2AC14	no	no	no	no	no
randomized set 11	Q96JM7	L3MBTL3	yes	no	yes	yes	yes
randomized set 11	Q9Y5Y9	SCN10A	no	no	yes	yes	yes
randomized set 11	Q969Z4	RELT	no	no	no	yes	no
randomized set 11	Q4G0P3	HYDIN	no	no	no	no	no
randomized set 11	Q8WXI3	ASB10	no	no	yes	yes	no
randomized set 11	Q75WM6	H1-7	no	yes	no	no	no
randomized set 11	Q13332	PTPRS	no	no	yes	no	yes
randomized set 11	Q00597	FANCC	no	no	no	no	yes
randomized set 11	Q9UQ90	SPG7	no	yes	no	no	no
randomized set 11	Q9BXL8	CDCA4	no	no	no	no	yes
randomized set 11	Q16518	RPE65	no	no	no	yes	no
randomized set 11	P00734	F2	no	no	no	yes	yes
randomized set 11	O96011	PEX11B	no	no	yes	yes	yes
randomized set 11	Q9NWU2	GID8	no	no	no	no	yes
randomized set 11	Q9Y2B2	PIGL	no	no	no	yes	no
randomized set 11	Q8WWN8	ARAP3	yes	no	yes	yes	yes
randomized set 11	Q9UNA0	ADAMTS5	no	no	yes	yes	yes
randomized set 11	P24863	CCNC	no	no	no	yes	yes
randomized set 11	A8MXD5	GRXCR1	no	no	yes	yes	no
randomized set 11	Q9UKJ8	ADAM21	no	no	yes	no	no
randomized set 11	Q7Z7G8	VPS13B	no	no	no	no	yes
randomized set 11	Q96RI1	NR1H4	no	no	no	yes	yes
randomized set 11	P32856	STX2	no	no	yes	yes	yes
randomized set 11	Q12836	ZP4	no	yes	no	no	no
randomized set 11	Q9H0V9	LMAN2L	no	no	yes	no	no
randomized set 11	Q9BXW6	OSBPL1A	no	no	yes	no	yes
randomized set 11	O00629	KPNA4	yes	no	yes	yes	yes
randomized set 11	Q9P2P5	HECW2	no	no	yes	no	yes
randomized set 11	Q969T9	WBP2	no	no	yes	no	yes
randomized set 11	P52888	THOP1	no	no	yes	no	no
randomized set 11	Q8IWV7	UBR1	no	no	yes	yes	no
randomized set 11	Q13868	EXOSC2	no	no	no	yes	yes
randomized set 11	Q6RI45	BRWD3	no	no	yes	no	yes
randomized set 11	O43719	HTATSF1	no	no	no	no	yes
randomized set 11	Q8IZU9	KIRREL3	yes	no	yes	yes	yes
randomized set 11	P01871	IGHM	no	no	no	no	no
randomized set 11	Q07617	SPAG1	no	no	yes	no	no
randomized set 11	Q8N2S1	LTBP4	no	no	yes	no	yes
randomized set 11	P20337	RAB3B	no	no	yes	yes	yes
randomized set 11	Q13023	AKAP6	no	no	no	no	yes
randomized set 11	Q9Y4D2	DAGLA	no	no	no	yes	yes
randomized set 11	O75063	FAM20B	no	no	no	yes	yes
randomized set 11	Q9H3L0	MMADHC	no	yes	no	no	no
randomized set 11	Q07864	POLE	no	no	no	no	yes
randomized set 11	Q9H4E5	RHOJ	no	no	yes	yes	no
randomized set 11	Q5QNW6	H2BC18	no	yes	no	no	no
randomized set 11	Q6ZTW0	TPGS1	no	yes	no	no	no
randomized set 11	Q9UPX6	MINAR1	no	no	no	yes	no
randomized set 11	Q9NP72	RAB18	no	no	no	yes	yes
randomized set 11	O95837	GNA14	no	no	yes	yes	no
randomized set 11	Q8N1W1	ARHGEF28	no	yes	no	no	no
randomized set 11	Q9UBF9	MYOT	no	yes	no	no	no
randomized set 11	O94842	TOX4	no	no	yes	no	yes
randomized set 11	Q8WVJ9	TWIST2	no	no	no	no	yes
randomized set 11	Q8TEB7	RNF128	no	no	yes	no	yes
randomized set 11	Q8TDX6	CSGALNACT1	no	no	yes	yes	no
randomized set 11	Q13639	HTR4	no	no	yes	no	yes
randomized set 11	Q9HAT0	ROPN1	no	yes	no	no	no
randomized set 11	Q96FM1	PGAP3	no	no	no	yes	no
randomized set 12	Q6PHR2	ULK3	no	no	no	yes	no
randomized set 12	A4D161	FAM221A	no	yes	no	no	no
randomized set 12	P04000	OPN1LW	no	no	yes	yes	yes
randomized set 12	P08195	SLC3A2	no	no	no	no	no
randomized set 12	Q96CW5	TUBGCP3	no	no	no	yes	yes
randomized set 12	Q7Z5R6	APBB1IP	no	no	no	yes	yes
randomized set 12	P32242	OTX1	no	no	yes	yes	yes
randomized set 12	Q86VW1	SLC22A16	no	yes	no	no	no
randomized set 12	P23945	FSHR	no	no	yes	yes	yes
randomized set 12	Q9Y5S9	RBM8A	no	no	no	no	yes
randomized set 12	Q08380	LGALS3BP	no	no	yes	no	no
randomized set 12	Q96J42	TXNDC15	no	yes	no	no	no
randomized set 12	Q96BD8	SKA1	no	no	no	yes	yes
randomized set 12	Q9HBG6	IFT122	no	no	no	yes	yes
randomized set 12	P15502	ELN	no	yes	no	no	no
randomized set 12	Q4LDE5	SVEP1	no	no	yes	yes	yes
randomized set 12	Q7Z769	SLC35E3	no	yes	no	no	no
randomized set 12	Q96CP7	TLCD1	no	yes	no	no	no
randomized set 12	P37058	HSD17B3	no	no	no	yes	no
randomized set 12	P48651	PTDSS1	no	no	no	yes	yes
randomized set 12	Q9H2C2	ARV1	no	yes	no	no	no
randomized set 12	Q9ULX7	CA14	no	no	yes	yes	no
randomized set 12	P13498	CYBA	no	no	no	no	yes
randomized set 12	P19474	TRIM21	no	no	yes	no	yes
randomized set 12	P10147	CCL3	no	no	no	no	no
randomized set 12	Q9Y3E7	CHMP3	no	no	no	no	yes
randomized set 12	P15056	BRAF	no	no	yes	no	yes
randomized set 12	Q9NYJ8	TAB2	yes	no	yes	yes	yes
randomized set 12	Q15633	TARBP2	no	no	yes	yes	yes
randomized set 12	P62829	RPL23	no	no	no	no	yes
randomized set 12	Q6L8H1	KRTAP5-4	no	no	no	no	no
randomized set 12	Q7LG56	RRM2B	no	no	yes	yes	yes
randomized set 12	Q9Y6E0	STK24	no	no	yes	yes	yes
randomized set 12	Q96RU7	TRIB3	no	no	yes	yes	no
randomized set 12	Q8TAT6	NPLOC4	no	no	no	yes	yes
randomized set 12	Q13516	OLIG2	no	no	no	no	yes
randomized set 12	O00463	TRAF5	no	no	yes	no	yes
randomized set 12	Q13228	SELENBP1	no	yes	no	no	no
randomized set 12	Q8TES7	FBF1	no	no	no	yes	no
randomized set 12	Q6P1L6	ZNF343	no	no	yes	no	no
randomized set 12	Q9HCD5	NCOA5	no	no	no	yes	yes
randomized set 12	Q9H596	DUSP21	no	no	no	yes	no
randomized set 12	P36382	GJA5	no	yes	no	no	no
randomized set 12	Q5VSL9	STRIP1	no	no	yes	no	yes
randomized set 12	O00139	KIF2A	yes	no	yes	yes	yes
randomized set 12	Q16134	ETFDH	no	no	no	yes	no
randomized set 12	O76021	RSL1D1	no	no	no	no	yes
randomized set 12	Q96HJ5	MS4A3	no	yes	no	no	no
randomized set 12	O14638	ENPP3	no	no	yes	no	no
randomized set 12	O75815	BCAR3	yes	no	yes	yes	yes
randomized set 12	P47755	CAPZA2	no	no	yes	no	yes
randomized set 12	O94983	CAMTA2	no	no	no	yes	yes
randomized set 12	P09629	HOXB7	no	no	no	yes	yes
randomized set 12	Q9P0N9	TBC1D7	no	no	no	yes	no
randomized set 12	Q16853	AOC3	no	yes	no	no	no
randomized set 12	Q9Y5N1	HRH3	no	no	yes	no	yes
randomized set 12	Q5TZK3	FAM74A4	no	no	no	no	no
randomized set 12	Q6ZVD7	STOX1	no	no	yes	yes	no
randomized set 12	Q9UDV6	ZNF212	no	yes	no	no	no
randomized set 12	Q16621	NFE2	no	no	yes	yes	yes
randomized set 12	Q3SXP7	SHISAL1	no	no	no	no	no
randomized set 12	Q9Y484	WDR45	no	no	no	no	yes
randomized set 12	Q0ZGT2	NEXN	no	no	no	yes	no
randomized set 12	Q6GYQ0	RALGAPA1	no	no	yes	no	yes
randomized set 12	Q7Z442	PKD1L2	no	no	no	no	no
randomized set 12	Q9BVI0	PHF20	no	no	yes	no	yes
randomized set 12	Q9NYM9	BET1L	no	yes	no	no	no
randomized set 12	Q92879	CELF1	no	no	yes	no	yes
randomized set 12	O43312	MTSS1	yes	no	yes	yes	yes
randomized set 12	Q6NZ36	FAAP20	no	no	no	no	no
randomized set 12	Q01167	FOXK2	no	no	yes	no	yes
randomized set 12	P26998	CRYBB3	no	no	yes	yes	no
randomized set 12	P01859	IGHG2	no	no	no	no	no
randomized set 12	Q9H0R8	GABARAPL1	no	no	yes	no	yes
randomized set 12	Q8WXA8	HTR3C	no	yes	no	no	no
randomized set 12	P17023	ZNF19	no	yes	no	no	no
randomized set 12	P42679	MATK	no	no	yes	no	yes
randomized set 12	O15405	TOX3	yes	no	yes	yes	yes
randomized set 12	P30038	ALDH4A1	no	no	no	yes	yes
randomized set 12	Q15772	SPEG	no	no	no	no	yes
randomized set 12	Q969H4	CNKSR1	no	no	yes	no	no
randomized set 12	P00846	MT-ATP6	no	no	no	no	no
randomized set 12	Q9NSC2	SALL1	yes	no	yes	yes	yes
randomized set 12	Q8TBG4	ETNPPL	no	no	yes	yes	no
randomized set 12	Q9Y3Q3	TMED3	no	no	yes	no	no
randomized set 12	Q7Z4V0	ZNF438	no	no	no	yes	no
randomized set 12	Q9NUM4	TMEM106B	no	no	yes	no	yes
randomized set 12	O94991	SLITRK5	no	no	yes	yes	yes
randomized set 12	P58340	MLF1	no	no	yes	yes	no
randomized set 13	P54753	EPHB3	no	no	yes	no	yes
randomized set 13	Q9Y5R4	HEMK1	no	no	no	yes	no
randomized set 13	Q8N140	EID3	no	yes	no	no	no
randomized set 13	Q17RD7	SYT16	no	no	yes	yes	no
randomized set 13	Q9NYF0	DACT1	no	no	no	no	yes
randomized set 13	Q9Y2D4	EXOC6B	no	no	yes	no	yes
randomized set 13	Q96H72	SLC39A13	no	no	no	yes	no
randomized set 13	P05160	F13B	no	no	no	yes	no
randomized set 13	Q6ZVK8	NUDT18	no	no	no	no	no
randomized set 13	P01036	CST4	no	no	yes	no	no
randomized set 13	O75976	CPD	no	no	no	no	yes
randomized set 13	Q9UKV8	AGO2	yes	no	yes	yes	yes
randomized set 13	Q969R8	ITFG2	no	no	no	yes	no
randomized set 13	Q86UY6	NAA40	no	yes	no	no	no
randomized set 13	P54762	EPHB1	yes	no	yes	yes	yes
randomized set 13	Q9BVG9	PTDSS2	no	no	no	no	yes
randomized set 13	Q96GM8	TOE1	no	no	no	yes	yes
randomized set 13	Q8IYJ0	PIANP	no	no	no	yes	yes
randomized set 13	Q16549	PCSK7	no	no	no	yes	yes
randomized set 13	P17900	GM2A	no	yes	no	no	no
randomized set 13	Q9NX76	CMTM6	no	no	no	yes	no
randomized set 13	P0DPH8	TUBA3D	no	no	yes	no	no
randomized set 13	Q96FZ2	HMCES	no	yes	no	no	no
randomized set 13	Q9UKM7	MAN1B1	no	yes	no	no	no
randomized set 13	Q86T03	PIP4P1	no	no	yes	no	no
randomized set 13	Q8N568	DCLK2	yes	no	yes	yes	yes
randomized set 13	Q13564	NAE1	no	no	no	yes	yes
randomized set 13	P02724	GYPA	no	yes	no	no	no
randomized set 13	Q9ULJ3	ZBTB21	no	no	no	no	yes
randomized set 13	Q92521	PIGB	no	yes	no	no	no
randomized set 13	P15169	CPN1	no	no	yes	no	no
randomized set 13	P28290	ITPRID2	no	yes	no	no	no
randomized set 13	Q6J9G0	STYK1	no	no	no	yes	no
randomized set 13	O00329	PIK3CD	no	no	yes	no	yes
randomized set 13	P12110	COL6A2	no	no	yes	no	yes
randomized set 13	Q8NG98	OR7D4	no	yes	no	no	no
randomized set 13	Q9H2V7	SPNS1	no	no	yes	yes	yes
randomized set 13	P31431	SDC4	no	no	yes	yes	yes
randomized set 13	Q92805	GOLGA1	no	yes	no	no	no
randomized set 13	P18583	SON	no	no	no	no	yes
randomized set 13	O94832	MYO1D	no	no	yes	yes	yes
randomized set 13	O60656	UGT1A9	no	yes	no	no	no
randomized set 13	Q9NRP7	STK36	no	yes	no	no	no
randomized set 13	Q9Y680	FKBP7	no	no	yes	yes	no
randomized set 13	Q15910	EZH2	no	no	yes	no	yes
randomized set 13	P01699	IGLV1-44	no	no	no	no	no
randomized set 13	P25116	F2R	no	no	no	yes	yes
randomized set 13	P51793	CLCN4	no	no	yes	no	yes
randomized set 13	Q96GM1	PLPPR2	no	no	yes	no	yes
randomized set 13	Q9UK05	GDF2	no	yes	no	no	no
randomized set 13	Q9HB71	CACYBP	no	no	no	no	yes
randomized set 13	P24557	TBXAS1	no	no	yes	no	no
randomized set 13	Q9HCX4	TRPC7	no	no	yes	yes	yes
randomized set 13	O95861	BPNT1	no	no	no	yes	no
randomized set 13	Q96G30	MRAP2	no	no	no	yes	no
randomized set 13	P10632	CYP2C8	no	no	yes	no	no
randomized set 13	O60888	CUTA	no	yes	no	yes	no
randomized set 13	P31997	CEACAM8	no	yes	no	no	no
randomized set 13	Q13023	AKAP6	no	no	no	no	yes
randomized set 13	Q9P0J1	PDP1	no	no	yes	yes	yes
randomized set 13	Q96JF0	ST6GAL2	no	no	yes	yes	no
randomized set 13	Q9UKG9	CROT	no	no	no	yes	no
randomized set 13	Q9H222	ABCG5	no	no	no	yes	no
randomized set 13	Q8IUC6	TICAM1	no	no	no	no	yes
randomized set 13	Q14520	HABP2	no	no	yes	no	no
randomized set 13	P35398	RORA	yes	no	yes	yes	yes
randomized set 13	P26639	TARS1	no	no	yes	yes	no
randomized set 13	O95201	ZNF205	no	no	yes	yes	no
randomized set 13	Q14703	MBTPS1	no	no	no	yes	no
randomized set 13	Q92905	COPS5	no	no	no	no	yes
randomized set 13	Q8TEM1	NUP210	no	no	yes	yes	no
randomized set 13	Q9UQE7	SMC3	no	no	no	yes	yes
randomized set 13	O15259	NPHP1	no	no	no	yes	no
randomized set 13	P53701	HCCS	no	no	no	yes	yes
randomized set 13	P35555	FBN1	yes	no	yes	yes	yes
randomized set 13	O95154	AKR7A3	no	yes	no	no	no
randomized set 13	P51813	BMX	no	no	yes	no	yes
randomized set 13	P20718	GZMH	no	yes	no	no	no
randomized set 13	Q969E3	UCN3	no	no	no	no	no
randomized set 13	Q5T160	RARS2	no	no	no	yes	no
randomized set 13	O95932	TGM6	no	no	yes	no	no
randomized set 13	Q9BXU9	CALN1	no	no	yes	no	no
randomized set 13	P36776	LONP1	no	no	no	no	yes
randomized set 13	O00423	EML1	yes	no	yes	yes	yes
randomized set 13	Q96BK5	PINX1	no	yes	no	no	no
randomized set 13	O43914	TYROBP	no	no	no	yes	yes
randomized set 13	Q96FJ0	STAMBPL1	no	no	yes	yes	yes
randomized set 13	Q15067	ACOX1	no	no	no	yes	yes
randomized set 13	Q86VH2	KIF27	no	no	no	yes	no
randomized set 14	Q9Y2I6	NINL	no	no	yes	no	no
randomized set 14	Q9Y6X5	ENPP4	no	no	yes	no	yes
randomized set 14	P16389	KCNA2	no	no	yes	yes	yes
randomized set 14	Q96NM4	TOX2	no	no	yes	no	yes
randomized set 14	Q8IXZ2	ZC3H3	no	no	no	no	yes
randomized set 14	P35452	HOXD12	no	no	yes	no	no
randomized set 14	P19440	GGT1	no	no	yes	no	no
randomized set 14	C9JRZ8	AKR1B15	no	yes	no	no	no
randomized set 14	P14416	DRD2	no	no	yes	yes	yes
randomized set 14	Q9H2S6	TNMD	no	no	no	yes	yes
randomized set 14	Q99808	SLC29A1	no	no	yes	no	yes
randomized set 14	Q9C0K0	BCL11B	yes	no	yes	yes	yes
randomized set 14	Q9H008	LHPP	no	no	no	yes	no
randomized set 14	Q9Y5Z7	HCFC2	no	no	no	no	yes
randomized set 14	P06744	GPI	no	no	no	no	yes
randomized set 14	P30990	NTS	no	no	no	yes	no
randomized set 14	Q12815	TROAP	no	no	no	yes	no
randomized set 14	Q15165	PON2	no	yes	no	no	no
randomized set 14	O75425	MOSPD3	no	no	yes	no	no
randomized set 14	Q9HBD1	RC3H2	no	no	yes	no	yes
randomized set 14	Q7Z3E1	TIPARP	yes	no	yes	yes	yes
randomized set 14	Q9H295	DCSTAMP	no	no	no	yes	no
randomized set 14	Q13950	RUNX2	yes	no	yes	yes	yes
randomized set 14	Q6H8Q1	ABLIM2	no	no	yes	no	yes
randomized set 14	P17509	HOXB6	no	no	yes	no	yes
randomized set 14	Q04206	RELA	no	no	yes	no	yes
randomized set 14	Q9H2F5	EPC1	yes	no	yes	yes	yes
randomized set 14	Q96EP0	RNF31	no	no	no	yes	yes
randomized set 14	P30533	LRPAP1	no	yes	no	no	no
randomized set 14	Q86XF0	DHFR2	no	yes	no	no	no
randomized set 14	P62942	FKBP1A	no	no	yes	no	no
randomized set 14	Q9H1Y3	OPN3	no	no	yes	no	yes
randomized set 14	Q9UEG4	ZNF629	yes	no	yes	yes	yes
randomized set 14	Q8NHH9	ATL2	yes	no	yes	yes	yes
randomized set 14	P08118	MSMB	no	yes	no	no	no
randomized set 14	P98077	SHC2	no	no	yes	no	yes
randomized set 14	A8K8V0	ZNF785	no	yes	no	no	no
randomized set 14	Q6IEG0	SNRNP48	no	no	no	yes	no
randomized set 14	Q07866	KLC1	no	no	yes	yes	no
randomized set 14	O43399	TPD52L2	no	no	yes	no	no
randomized set 14	P56557	TMEM50B	no	yes	yes	no	no
randomized set 14	O00168	FXYD1	no	yes	no	no	no
randomized set 14	O43482	OIP5	no	yes	no	no	no
randomized set 14	O15503	INSIG1	no	no	no	no	yes
randomized set 14	Q8NBF1	GLIS1	no	no	no	yes	yes
randomized set 14	Q53H82	LACTB2	no	no	no	yes	no
randomized set 14	Q9UGI8	TES	no	no	yes	no	yes
randomized set 14	P26572	MGAT1	no	no	no	no	yes
randomized set 14	Q92626	PXDN	no	no	no	no	yes
randomized set 14	Q15822	CHRNA2	no	no	yes	yes	no
randomized set 14	Q9Y295	DRG1	no	no	no	no	yes
randomized set 14	P31948	STIP1	no	no	no	no	yes
randomized set 14	Q5XXA6	ANO1	no	no	yes	no	yes
randomized set 14	Q9UQ84	EXO1	no	no	no	yes	yes
randomized set 14	Q8WXE1	ATRIP	no	no	no	no	yes
randomized set 14	Q5T5U3	ARHGAP21	no	no	yes	no	yes
randomized set 14	Q9UNA1	ARHGAP26	yes	no	yes	yes	yes
randomized set 14	Q8IX21	SLF2	no	yes	no	no	no
randomized set 14	O75147	OBSL1	no	yes	no	no	no
randomized set 14	O00217	NDUFS8	no	yes	no	no	no
randomized set 14	Q8NDI1	EHBP1	no	no	no	no	yes
randomized set 14	P15514	AREG	no	no	no	yes	no
randomized set 14	O75899	GABBR2	no	no	no	no	yes
randomized set 14	P01563	IFNA2	no	yes	no	no	no
randomized set 14	Q15080	NCF4	no	yes	no	no	no
randomized set 14	Q96LT7	C9orf72	no	no	no	yes	no
randomized set 14	P52815	MRPL12	no	yes	no	no	no
randomized set 14	Q8N335	GPD1L	no	no	yes	no	no
randomized set 14	O75127	PTCD1	no	no	no	yes	no
randomized set 14	P62857	RPS28	no	no	no	no	yes
randomized set 14	O43866	CD5L	no	no	no	yes	no
randomized set 14	P35080	PFN2	no	no	no	no	yes
randomized set 14	Q7Z7F0	KHDC4	no	no	no	yes	yes
randomized set 14	Q8WVX3	C4orf3	no	no	no	no	no
randomized set 14	Q9BV68	RNF126	no	no	no	no	yes
randomized set 14	Q9NXA8	SIRT5	no	no	no	yes	no
randomized set 14	Q96LI6	HSFY1	no	no	no	no	no
randomized set 14	Q14416	GRM2	no	no	yes	no	yes
randomized set 14	O14880	MGST3	no	yes	no	no	no
randomized set 14	P09486	SPARC	no	no	yes	no	yes
randomized set 14	Q8IWZ3	ANKHD1	no	no	yes	no	no
randomized set 14	P17752	TPH1	no	no	yes	yes	no
randomized set 14	P09958	FURIN	yes	no	yes	yes	yes
randomized set 14	Q9BXA5	SUCNR1	no	yes	no	no	no
randomized set 14	Q9UI38	PRSS50	no	no	no	no	no
randomized set 14	P57081	WDR4	no	no	no	yes	no
randomized set 14	Q9NYW4	TAS2R5	no	yes	no	no	no
randomized set 14	Q96FX8	PERP	no	no	no	no	yes
randomized set 14	Q08334	IL10RB	no	yes	no	no	no
randomized set 15	O43916	CHST1	no	no	yes	no	yes
randomized set 15	P00439	PAH	no	no	yes	no	yes
randomized set 15	P18283	GPX2	no	yes	no	no	no
randomized set 15	Q7Z3J2	VPS35L	no	yes	no	no	no
randomized set 15	Q8WVE7	TMEM170A	no	no	yes	no	no
randomized set 15	Q99217	AMELX	no	yes	no	no	no
randomized set 15	P12235	SLC25A4	no	no	yes	no	yes
randomized set 15	Q9HBG7	LY9	no	yes	no	no	no
randomized set 15	Q8NCP5	ZBTB44	no	no	no	yes	yes
randomized set 15	Q8IWT1	SCN4B	no	no	no	yes	no
randomized set 15	Q5EE01	CENPW	no	no	no	no	no
randomized set 15	P35070	BTC	no	no	no	yes	no
randomized set 15	O60232	ZNRD2	no	yes	no	no	no
randomized set 15	Q6AI39	BICRAL	no	no	no	yes	yes
randomized set 15	P35568	IRS1	no	no	yes	yes	yes
randomized set 15	P0DPD8	EEF1AKMT4-ECE2	no	no	no	no	no
randomized set 15	Q01534	TSPY1	no	no	no	no	no
randomized set 15	P56696	KCNQ4	yes	no	yes	yes	yes
randomized set 15	P62873	GNB1	no	no	yes	no	yes
randomized set 15	Q8IYD8	FANCM	no	no	no	no	yes
randomized set 15	O43914	TYROBP	no	no	no	yes	yes
randomized set 15	Q969Q6	PPP2R3C	no	yes	no	no	no
randomized set 15	Q01668	CACNA1D	no	no	yes	no	yes
randomized set 15	Q9Y3A3	MOB4	no	no	no	no	yes
randomized set 15	Q9Y328	NSG2	no	no	no	no	no
randomized set 15	Q685J3	MUC17	no	no	no	no	no
randomized set 15	Q6GYQ0	RALGAPA1	no	no	yes	no	yes
randomized set 15	Q14141	SEPTIN6	no	no	yes	yes	yes
randomized set 15	P28482	MAPK1	yes	no	yes	yes	yes
randomized set 15	Q6ZMJ4	IL34	no	no	no	yes	no
randomized set 15	O95104	SCAF4	no	no	no	yes	yes
randomized set 15	O14613	CDC42EP2	no	no	no	no	yes
randomized set 15	Q7Z7H5	TMED4	no	no	yes	yes	yes
randomized set 15	Q9UHI7	SLC23A1	no	no	yes	yes	yes
randomized set 15	P22612	PRKACG	no	no	yes	no	no
randomized set 15	O95343	SIX3	no	no	yes	no	yes
randomized set 15	Q04118	PRB3	no	yes	no	no	no
randomized set 15	Q2Q1W2	TRIM71	no	no	no	no	yes
randomized set 15	P26012	ITGB8	no	no	yes	no	yes
randomized set 15	P36957	DLST	no	no	no	yes	yes
randomized set 15	Q9Y5J7	TIMM9	no	no	no	yes	no
randomized set 15	Q9BQK8	LPIN3	no	no	yes	yes	no
randomized set 15	Q9HBX9	RXFP1	no	no	yes	yes	no
randomized set 15	P06340	HLA-DOA	no	yes	no	no	no
randomized set 15	Q8IUR6	CREBRF	no	no	no	yes	yes
randomized set 15	Q8IYJ0	PIANP	no	no	no	yes	yes
randomized set 15	O15347	HMGB3	no	no	yes	no	yes
randomized set 15	O76095	JTB	no	no	no	no	yes
randomized set 15	P12694	BCKDHA	no	yes	no	no	no
randomized set 15	O00767	SCD	no	no	yes	no	yes
randomized set 15	Q9BQB4	SOST	no	no	yes	no	yes
randomized set 15	Q9H490	PIGU	no	no	no	yes	yes
randomized set 15	P13284	IFI30	no	yes	no	no	no
randomized set 15	P0DMM9	SULT1A3	no	yes	no	no	no
randomized set 15	P49675	STAR	no	no	no	yes	no
randomized set 15	P46020	PHKA1	no	no	yes	no	yes
randomized set 15	Q9Y5S1	TRPV2	no	no	yes	yes	no
randomized set 15	P51813	BMX	no	no	yes	no	yes
randomized set 15	Q8N7W2	BEND7	no	yes	no	no	no
randomized set 15	Q3MIR4	TMEM30B	no	no	yes	no	no
randomized set 15	Q9BYB0	SHANK3	no	no	no	no	yes
randomized set 15	Q13572	ITPK1	no	no	no	yes	yes
randomized set 15	Q8NFM4	ADCY4	no	no	yes	yes	no
randomized set 15	Q3LXA3	TKFC	no	no	no	yes	no
randomized set 15	O00501	CLDN5	no	no	yes	no	no
randomized set 15	Q13011	ECH1	no	no	no	yes	no
randomized set 15	Q13563	PKD2	yes	no	yes	yes	yes
randomized set 15	Q9BZG2	ACP4	no	no	yes	no	no
randomized set 15	Q14982	OPCML	no	no	yes	no	yes
randomized set 15	O75159	SOCS5	no	no	yes	yes	yes
randomized set 15	P49447	CYB561	no	no	yes	no	no
randomized set 15	Q9NZ09	UBAP1	no	no	no	no	no
randomized set 15	P22087	FBL	no	no	no	no	yes
randomized set 15	Q8ND90	PNMA1	no	no	no	yes	yes
randomized set 15	P29122	PCSK6	no	no	yes	yes	no
randomized set 15	P40933	IL15	no	no	no	yes	yes
randomized set 15	P18077	RPL35A	no	no	no	no	yes
randomized set 15	P35680	HNF1B	no	no	no	no	yes
randomized set 15	Q8IYT2	CMTR2	no	yes	no	no	no
randomized set 15	Q92636	NSMAF	no	no	no	yes	yes
randomized set 15	Q16663	CCL15	no	no	no	no	no
randomized set 15	Q9HB20	PLEKHA3	no	no	yes	yes	no
randomized set 15	P35268	RPL22	no	no	yes	no	yes
randomized set 15	P78411	IRX5	no	no	yes	yes	no
randomized set 15	P06753	TPM3	no	no	yes	no	yes
randomized set 15	Q15077	P2RY6	no	yes	no	no	no
randomized set 15	Q92585	MAML1	yes	no	yes	yes	yes
randomized set 15	Q08AM6	VAC14	no	no	no	no	yes
randomized set 15	Q9Y5P6	GMPPB	no	no	no	yes	yes
randomized set 16	Q96BK5	PINX1	no	yes	no	no	no
randomized set 16	P08195	SLC3A2	no	no	no	no	no
randomized set 16	Q8IU68	TMC8	no	no	yes	no	no
randomized set 16	Q9Y478	PRKAB1	no	no	no	yes	yes
randomized set 16	Q92551	IP6K1	no	no	yes	yes	yes
randomized set 16	Q15532	SS18	no	no	no	no	yes
randomized set 16	Q96PH1	NOX5	no	yes	no	no	no
randomized set 16	O95997	PTTG1	no	no	no	no	yes
randomized set 16	Q9NRF2	SH2B1	yes	no	yes	yes	yes
randomized set 16	Q96L91	EP400	no	no	no	yes	yes
randomized set 16	P56748	CLDN8	no	no	yes	no	no
randomized set 16	Q8NFC6	BOD1L1	no	no	no	yes	yes
randomized set 16	P27487	DPP4	no	no	yes	no	no
randomized set 16	P23276	KEL	no	no	no	yes	no
randomized set 16	Q86XF0	DHFR2	no	yes	no	no	no
randomized set 16	P10912	GHR	no	no	no	yes	yes
randomized set 16	Q5D862	FLG2	no	yes	no	no	no
randomized set 16	Q9Y570	PPME1	no	no	no	no	yes
randomized set 16	O14757	CHEK1	no	no	no	yes	yes
randomized set 16	Q13541	EIF4EBP1	no	no	no	no	yes
randomized set 16	Q3MIR4	TMEM30B	no	no	yes	no	no
randomized set 16	Q5JVF3	PCID2	no	no	no	yes	yes
randomized set 16	B3KU38	IQCJ-SCHIP1	no	no	no	no	no
randomized set 16	P01308	INS	no	no	no	no	no
randomized set 16	Q6PD62	CTR9	no	no	no	yes	yes
randomized set 16	P57727	TMPRSS3	no	no	yes	no	no
randomized set 16	Q9BZL6	PRKD2	yes	no	yes	yes	yes
randomized set 16	Q5JPH6	EARS2	no	yes	no	no	no
randomized set 16	Q9Y3E2	BOLA1	no	no	no	no	no
randomized set 16	Q8N960	CEP120	no	no	no	yes	yes
randomized set 16	Q99612	KLF6	yes	no	yes	yes	yes
randomized set 16	Q9BVA1	TUBB2B	no	no	no	no	no
randomized set 16	Q9UJT9	FBXL7	no	no	no	yes	yes
randomized set 16	Q8TE85	GRHL3	yes	no	yes	yes	yes
randomized set 16	Q5VWC8	HACD4	no	no	no	yes	no
randomized set 16	Q0WX57	USP17L24	no	no	no	no	no
randomized set 16	Q15038	DAZAP2	no	no	no	yes	no
randomized set 16	P18440	NAT1	no	yes	no	no	no
randomized set 16	P28221	HTR1D	no	no	yes	no	no
randomized set 16	P28336	NMBR	no	no	yes	yes	no
randomized set 16	Q15771	RAB30	no	no	no	yes	yes
randomized set 16	Q93100	PHKB	no	no	no	yes	yes
randomized set 16	Q9H6E5	TUT1	no	no	no	no	yes
randomized set 16	Q9UBT6	POLK	no	no	no	yes	yes
randomized set 16	Q13952	NFYC	no	no	no	yes	yes
randomized set 16	P55075	FGF8	no	no	yes	no	yes
randomized set 16	P06756	ITGAV	no	no	yes	yes	yes
randomized set 16	Q96DT7	ZBTB10	no	no	no	yes	yes
randomized set 16	Q86VL8	SLC47A2	no	yes	no	no	no
randomized set 16	Q15583	TGIF1	no	no	yes	no	yes
randomized set 16	P11498	PC	no	no	no	yes	yes
randomized set 16	Q9NPE3	NOP10	no	no	no	no	yes
randomized set 16	P28069	POU1F1	no	no	yes	yes	yes
randomized set 16	Q9NZV7	ZIM2	no	yes	no	no	no
randomized set 16	Q9Y328	NSG2	no	no	no	no	no
randomized set 16	O60503	ADCY9	no	no	no	yes	yes
randomized set 16	Q969D9	TSLP	no	yes	no	no	no
randomized set 16	Q6X4W1	NSMF	no	no	no	no	yes
randomized set 16	P37059	HSD17B2	no	no	yes	no	no
randomized set 16	Q8N8S7	ENAH	no	no	no	yes	yes
randomized set 16	Q2PPJ7	RALGAPA2	no	no	yes	no	yes
randomized set 16	P60329	KRTAP12-4	no	yes	no	no	no
randomized set 16	Q5U651	RASIP1	no	no	yes	no	yes
randomized set 16	O00505	KPNA3	no	no	yes	no	yes
randomized set 16	Q96C36	PYCR2	no	yes	no	no	no
randomized set 16	Q9NXC5	MIOS	no	yes	no	no	no
randomized set 16	Q5T440	IBA57	no	yes	no	no	no
randomized set 16	Q96I99	SUCLG2	no	yes	no	no	no
randomized set 16	P04196	HRG	no	no	no	yes	no
randomized set 16	P35573	AGL	no	no	no	no	yes
randomized set 16	Q8IUG5	MYO18B	no	no	yes	no	no
randomized set 16	Q8WXW3	PIBF1	no	no	no	yes	no
randomized set 16	Q9BZ71	PITPNM3	yes	no	yes	yes	yes
randomized set 16	O00180	KCNK1	no	no	yes	yes	yes
randomized set 16	Q9Y3E5	PTRH2	no	no	no	yes	no
randomized set 16	P82933	MRPS9	no	no	no	no	yes
randomized set 16	Q6ICL7	SLC35E4	no	no	no	yes	no
randomized set 16	Q70J99	UNC13D	no	no	yes	yes	no
randomized set 16	P18887	XRCC1	no	no	no	yes	yes
randomized set 16	Q9UGN5	PARP2	no	no	no	yes	yes
randomized set 16	Q96A70	AZIN2	no	no	yes	yes	no
randomized set 16	Q01081	U2AF1	no	no	no	no	yes
randomized set 16	Q6DT37	CDC42BPG	no	no	yes	yes	no
randomized set 16	Q96LB1	MRGPRX2	no	yes	no	no	no
randomized set 16	O95971	CD160	no	yes	no	no	no
randomized set 16	Q6EIG7	CLEC6A	no	no	yes	no	no
randomized set 16	O95125	ZNF202	no	no	no	yes	no
randomized set 16	A1L0T0	ILVBL	no	no	no	yes	no
randomized set 16	Q9BXI3	NT5C1A	no	no	yes	yes	no
randomized set 17	Q9Y278	HS3ST2	no	no	yes	yes	yes
randomized set 17	Q9UNN8	PROCR	no	no	no	yes	no
randomized set 17	Q96QT4	TRPM7	no	no	yes	yes	yes
randomized set 17	O95758	PTBP3	yes	no	yes	yes	yes
randomized set 17	P07451	CA3	no	no	yes	yes	no
randomized set 17	Q96CN9	GCC1	no	no	no	yes	no
randomized set 17	O43299	AP5Z1	no	no	no	no	no
randomized set 17	P29401	TKT	no	no	yes	no	yes
randomized set 17	Q9Y3M2	CBY1	no	no	no	yes	yes
randomized set 17	Q96E11	MRRF	no	yes	no	no	no
randomized set 17	Q9NXE8	CWC25	no	no	no	no	no
randomized set 17	Q8IYI8	ZNF440	no	yes	no	no	no
randomized set 17	Q8IYX3	CCDC116	no	no	no	yes	no
randomized set 17	Q9Y2C9	TLR6	no	no	yes	yes	no
randomized set 17	Q9H8M9	EVA1A	no	yes	no	no	no
randomized set 17	Q9UK17	KCND3	no	no	yes	no	yes
randomized set 17	Q86UW7	CADPS2	yes	no	yes	yes	yes
randomized set 17	O15529	GPR42	no	no	no	no	no
randomized set 17	Q9P1Z2	CALCOCO1	no	no	yes	no	yes
randomized set 17	Q8WWG1	NRG4	no	yes	no	no	no
randomized set 17	Q96N58	ZNF578	no	yes	no	no	no
randomized set 17	Q8NI27	THOC2	no	no	no	no	yes
randomized set 17	P45985	MAP2K4	no	no	no	no	yes
randomized set 17	Q9P000	COMMD9	no	no	no	no	no
randomized set 17	O14880	MGST3	no	yes	no	no	no
randomized set 17	Q96PE7	MCEE	no	yes	no	no	no
randomized set 17	Q92966	SNAPC3	no	no	no	yes	no
randomized set 17	Q9HCJ1	ANKH	no	no	no	no	yes
randomized set 17	P54107	CRISP1	no	no	no	yes	no
randomized set 17	O95503	CBX6	no	no	no	no	yes
randomized set 17	Q9NYU2	UGGT1	no	no	yes	no	no
randomized set 17	Q8TD31	CCHCR1	no	yes	no	no	no
randomized set 17	Q14524	SCN5A	yes	no	yes	yes	yes
randomized set 17	Q14995	NR1D2	no	no	yes	yes	yes
randomized set 17	O60641	SNAP91	no	no	yes	no	yes
randomized set 17	Q9P2M1	LRP2BP	no	no	no	yes	no
randomized set 17	Q8N7H5	PAF1	no	no	no	no	yes
randomized set 17	Q9HCJ0	TNRC6C	no	no	yes	no	yes
randomized set 17	Q6L8H4	KRTAP5-1	no	yes	no	no	no
randomized set 17	Q96AP7	ESAM	no	no	no	yes	no
randomized set 17	O75473	LGR5	no	no	yes	yes	yes
randomized set 17	Q9UJY1	HSPB8	no	no	no	yes	yes
randomized set 17	P57737	CORO7	no	yes	no	no	no
randomized set 17	Q8IVI9	NOSTRIN	no	no	no	yes	no
randomized set 17	Q8IX90	SKA3	no	no	no	yes	no
randomized set 17	Q9NYA4	MTMR4	no	no	yes	no	yes
randomized set 17	Q9NV31	IMP3	no	no	no	no	yes
randomized set 17	O00238	BMPR1B	yes	no	yes	yes	yes
randomized set 17	Q9H467	CUEDC2	no	no	no	no	yes
randomized set 17	Q96LA6	FCRL1	no	no	no	yes	no
randomized set 17	Q9Y6M4	CSNK1G3	no	no	yes	no	yes
randomized set 17	Q01668	CACNA1D	no	no	yes	no	yes
randomized set 17	Q8TF74	WIPF2	no	no	no	yes	yes
randomized set 17	O95196	CSPG5	no	no	no	yes	yes
randomized set 17	Q5VV41	ARHGEF16	no	no	yes	yes	no
randomized set 17	P43686	PSMC4	no	no	no	no	yes
randomized set 17	Q9BVP2	GNL3	no	no	no	yes	no
randomized set 17	O95630	STAMBP	no	no	yes	yes	yes
randomized set 17	Q9UMS0	NFU1	no	no	no	no	yes
randomized set 17	P46736	BRCC3	no	yes	no	no	yes
randomized set 17	Q8NFD2	ANKK1	no	no	yes	no	no
randomized set 17	Q8TCZ2	CD99L2	no	yes	no	no	no
randomized set 17	P0DJD3	RBMY1A1	no	no	no	no	no
randomized set 17	Q6ZN44	UNC5A	yes	no	yes	yes	yes
randomized set 17	O60704	TPST2	no	no	yes	yes	yes
randomized set 17	Q9H9Y6	POLR1B	no	no	no	yes	yes
randomized set 17	Q9BRP8	PYM1	no	no	no	no	no
randomized set 17	Q8TF47	ZFP90	no	no	yes	no	no
randomized set 17	P14672	SLC2A4	no	no	yes	no	yes
randomized set 17	Q3ZAQ7	VMA21	no	no	no	no	no
randomized set 17	O15173	PGRMC2	no	no	yes	yes	no
randomized set 17	Q5TB30	DEPDC1	no	no	yes	no	no
randomized set 17	Q9H2X6	HIPK2	no	no	yes	no	yes
randomized set 17	Q7Z5K2	WAPL	no	no	no	yes	yes
randomized set 17	Q9UBG3	CRNN	no	no	no	yes	no
randomized set 17	Q6ZNG0	ZNF620	no	yes	no	no	no
randomized set 17	Q9NRE2	TSHZ2	no	no	yes	yes	yes
randomized set 17	Q9BVG3	TRIM62	no	no	yes	yes	no
randomized set 17	Q9HD34	LYRM4	no	yes	no	no	no
randomized set 17	Q15561	TEAD4	no	no	yes	no	no
randomized set 17	Q8NEC5	CATSPER1	no	yes	no	no	no
randomized set 17	Q9BZC1	CELF4	no	no	yes	no	yes
randomized set 17	Q7Z3Y8	KRT27	no	yes	no	no	no
randomized set 17	O15018	PDZD2	no	no	no	no	yes
randomized set 17	Q3V5L5	MGAT5B	no	no	yes	yes	yes
randomized set 17	Q7L576	CYFIP1	no	no	no	no	yes
randomized set 17	Q9UK53	ING1	no	no	yes	no	yes
randomized set 17	P17020	ZNF16	no	no	yes	no	no
randomized set 17	Q16739	UGCG	no	no	no	yes	yes
randomized set 18	Q99607	ELF4	no	no	yes	no	yes
randomized set 18	Q8IXL7	MSRB3	no	no	yes	yes	yes
randomized set 18	Q53HL2	CDCA8	no	no	no	no	yes
randomized set 18	Q8N5D0	WDTC1	no	no	no	no	yes
randomized set 18	Q6PCT2	FBXL19	no	no	no	yes	yes
randomized set 18	Q96MM7	HS6ST2	no	no	yes	no	no
randomized set 18	Q9GZV1	ANKRD2	no	no	yes	yes	no
randomized set 18	Q13164	MAPK7	no	no	no	no	yes
randomized set 18	P15172	MYOD1	no	no	yes	yes	yes
randomized set 18	P01008	SERPINC1	yes	no	yes	yes	yes
randomized set 18	Q96N21	TEPSIN	no	yes	no	no	no
randomized set 18	P58418	CLRN1	no	yes	no	no	no
randomized set 18	Q96AQ8	MCUR1	no	no	no	yes	no
randomized set 18	O94964	SOGA1	yes	no	yes	yes	yes
randomized set 18	Q9UHV9	PFDN2	no	no	no	no	yes
randomized set 18	Q9NZJ9	NUDT4	no	no	yes	no	no
randomized set 18	P0CB47	UBTFL1	no	no	no	no	no
randomized set 18	P12109	COL6A1	no	no	no	yes	yes
randomized set 18	P19484	TFEB	yes	no	yes	yes	yes
randomized set 18	Q8N4C8	MINK1	no	no	no	no	yes
randomized set 18	Q15751	HERC1	no	no	no	no	yes
randomized set 18	Q03591	CFHR1	no	yes	no	no	no
randomized set 18	Q15759	MAPK11	no	no	yes	no	yes
randomized set 18	P15153	RAC2	no	no	yes	no	yes
randomized set 18	Q9Y4C1	KDM3A	yes	no	yes	yes	yes
randomized set 18	O43184	ADAM12	no	no	yes	yes	yes
randomized set 18	P17535	JUND	no	no	yes	no	yes
randomized set 18	Q00796	SORD	no	yes	no	no	no
randomized set 18	Q9UPZ3	HPS5	no	yes	no	no	no
randomized set 18	P35625	TIMP3	no	no	yes	yes	yes
randomized set 18	P01116	KRAS	no	no	yes	no	yes
randomized set 18	Q9UIK4	DAPK2	no	no	no	no	no
randomized set 18	Q8TAX9	GSDMB	no	yes	no	no	no
randomized set 18	Q15223	NECTIN1	no	no	yes	no	no
randomized set 18	Q99956	DUSP9	no	no	yes	no	yes
randomized set 18	Q14031	COL4A6	no	no	yes	yes	yes
randomized set 18	P07333	CSF1R	yes	no	yes	yes	yes
randomized set 18	Q96LA5	FCRL2	no	yes	no	no	no
randomized set 18	Q9Y6H3	ATP23	no	no	no	yes	no
randomized set 18	P25208	NFYB	no	no	no	no	yes
randomized set 18	Q9NS84	CHST7	no	no	yes	no	yes
randomized set 18	Q9H2V7	SPNS1	no	no	yes	yes	yes
randomized set 18	Q8WV22	NSMCE1	no	yes	no	no	no
randomized set 18	P19957	PI3	no	yes	no	no	no
randomized set 18	P08183	ABCB1	no	no	yes	no	yes
randomized set 18	Q14CN2	CLCA4	no	yes	no	no	no
randomized set 18	Q8N2U9	SLC66A2	no	yes	no	no	no
randomized set 18	O00214	LGALS8	no	no	yes	no	no
randomized set 18	Q5T8A7	PPP1R26	no	no	no	no	yes
randomized set 18	Q9NQR4	NIT2	no	no	no	yes	no
randomized set 18	P08908	HTR1A	yes	no	yes	yes	yes
randomized set 18	P08240	SRPRA	no	no	no	yes	yes
randomized set 18	P08648	ITGA5	yes	no	yes	yes	yes
randomized set 18	Q15329	E2F5	no	no	yes	yes	yes
randomized set 18	Q9UJS0	SLC25A13	no	no	yes	yes	yes
randomized set 18	Q96GZ6	SLC41A3	no	no	yes	no	no
randomized set 18	Q14676	MDC1	no	no	no	yes	yes
randomized set 18	P20929	NEB	no	yes	no	no	no
randomized set 18	Q96EN8	MOCOS	no	no	no	yes	no
randomized set 18	Q96LB2	MRGPRX1	no	yes	no	no	no
randomized set 18	P10415	BCL2	no	no	yes	yes	yes
randomized set 18	O14763	TNFRSF10B	no	yes	no	no	no
randomized set 18	Q16864	ATP6V1F	no	no	no	no	no
randomized set 18	Q14767	LTBP2	no	no	yes	yes	no
randomized set 18	Q96JN0	LCOR	no	no	yes	no	yes
randomized set 18	Q9BXC0	HCAR1	no	no	no	yes	no
randomized set 18	Q64LD2	WDR25	no	yes	no	no	no
randomized set 18	Q15004	PCLAF	no	yes	no	no	no
randomized set 18	Q96HW7	INTS4	no	no	no	no	yes
randomized set 18	Q96EK5	KIFBP	no	no	no	yes	no
randomized set 18	O60755	GALR3	no	no	yes	no	no
randomized set 18	Q9UL17	TBX21	yes	no	yes	yes	yes
randomized set 18	A2IDD5	CCDC78	no	yes	no	no	no
randomized set 18	Q96RT7	TUBGCP6	no	no	no	yes	no
randomized set 18	Q9NPP4	NLRC4	no	yes	no	no	no
randomized set 18	Q969H8	MYDGF	no	yes	no	no	no
randomized set 18	P32418	SLC8A1	no	no	yes	no	yes
randomized set 18	P17542	TAL1	no	no	yes	yes	yes
randomized set 18	Q9UEW8	STK39	no	no	yes	no	yes
randomized set 18	Q3KQV3	ZNF792	no	no	yes	no	no
randomized set 18	Q9Y520	PRRC2C	no	no	yes	yes	yes
randomized set 18	Q8IYM1	SEPTIN12	no	no	yes	yes	no
randomized set 18	Q7Z7D3	VTCN1	no	no	no	yes	no
randomized set 18	Q9UQB3	CTNND2	no	no	no	yes	yes
randomized set 18	P20290	BTF3	no	no	yes	no	yes
randomized set 18	Q9BXP5	SRRT	no	no	no	no	yes
randomized set 18	O75909	CCNK	no	no	no	yes	yes
randomized set 18	Q9Y2C9	TLR6	no	no	yes	yes	no
randomized set 18	P02144	MB	no	no	yes	no	no
randomized set 19	P15169	CPN1	no	no	yes	no	no
randomized set 19	Q86Y07	VRK2	no	no	yes	yes	no
randomized set 19	Q9NUT2	ABCB8	no	no	no	yes	no
randomized set 19	P59991	KRTAP12-2	no	yes	no	no	no
randomized set 19	Q8NEZ4	KMT2C	no	no	no	no	yes
randomized set 19	P19387	POLR2C	no	no	no	yes	yes
randomized set 19	Q6VN20	RANBP10	no	no	yes	no	yes
randomized set 19	Q969K7	TMEM54	no	no	no	yes	no
randomized set 19	Q9NY93	DDX56	no	no	no	yes	yes
randomized set 19	Q00613	HSF1	no	no	yes	no	yes
randomized set 19	Q14344	GNA13	no	no	yes	yes	yes
randomized set 19	Q9BXI6	TBC1D10A	no	no	yes	no	yes
randomized set 19	Q8TAB5	C1orf216	no	yes	no	no	no
randomized set 19	Q0D2K3	RIPPLY1	no	no	yes	no	no
randomized set 19	Q9UER7	DAXX	no	no	no	yes	yes
randomized set 19	P07478	PRSS2	no	no	no	no	no
randomized set 19	Q6U736	OPN5	yes	no	yes	yes	yes
randomized set 19	P57775	FBXW4	no	yes	no	no	no
randomized set 19	O95721	SNAP29	no	no	no	no	yes
randomized set 19	Q9C091	GREB1L	no	no	yes	no	no
randomized set 19	P30291	WEE1	yes	no	yes	yes	yes
randomized set 19	Q9NWW5	CLN6	no	no	no	yes	no
randomized set 19	Q9HCD5	NCOA5	no	no	no	yes	yes
randomized set 19	Q9UQ90	SPG7	no	yes	no	no	no
randomized set 19	Q9NZM1	MYOF	no	no	yes	no	no
randomized set 19	Q03692	COL10A1	no	no	yes	yes	no
randomized set 19	O00167	EYA2	no	no	yes	yes	yes
randomized set 19	Q96CW5	TUBGCP3	no	no	no	yes	yes
randomized set 19	Q9UPU5	USP24	no	no	no	no	yes
randomized set 19	Q8NA72	POC5	no	no	no	yes	no
randomized set 19	Q9H0B6	KLC2	no	no	yes	no	yes
randomized set 19	Q96PU4	UHRF2	no	no	yes	no	yes
randomized set 19	Q96S06	LMF1	no	no	no	yes	no
randomized set 19	Q9UGN5	PARP2	no	no	no	yes	yes
randomized set 19	P13807	GYS1	no	no	yes	yes	yes
randomized set 19	Q04741	EMX1	no	no	yes	no	yes
randomized set 19	O94855	SEC24D	no	no	yes	no	yes
randomized set 19	Q69YQ0	SPECC1L	no	no	yes	yes	yes
randomized set 19	Q14152	EIF3A	no	no	no	yes	yes
randomized set 19	Q9UPN7	PPP6R1	yes	no	yes	yes	yes
randomized set 19	Q6P1K2	PMF1	no	no	no	yes	yes
randomized set 19	Q9H081	MIS12	no	no	no	no	yes
randomized set 19	Q13349	ITGAD	no	no	yes	no	no
randomized set 19	Q9BUM1	G6PC3	no	no	yes	yes	no
randomized set 19	Q9P0K7	RAI14	no	no	yes	yes	yes
randomized set 19	Q13200	PSMD2	no	no	no	no	yes
randomized set 19	Q9HCD6	TANC2	yes	no	yes	yes	yes
randomized set 19	Q04725	TLE2	no	no	yes	no	yes
randomized set 19	P17066	HSPA6	no	yes	no	no	no
randomized set 19	Q06141	REG3A	no	yes	no	no	no
randomized set 19	P18405	SRD5A1	no	no	yes	yes	no
randomized set 19	P07332	FES	no	no	yes	no	yes
randomized set 19	P59044	NLRP6	no	no	no	no	no
randomized set 19	Q03014	HHEX	no	no	no	no	yes
randomized set 19	Q99969	RARRES2	no	no	no	yes	no
randomized set 19	Q9Y6N6	LAMC3	no	no	yes	no	yes
randomized set 19	Q8N1I0	DOCK4	no	no	yes	no	yes
randomized set 19	Q3LI66	KRTAP6-2	no	yes	no	no	no
randomized set 19	Q9BXS9	SLC26A6	no	yes	no	no	no
randomized set 19	Q9NZG7	NINJ2	no	yes	no	no	no
randomized set 19	P23280	CA6	no	no	no	yes	no
randomized set 19	Q68D86	CCDC102B	no	no	yes	no	no
randomized set 19	Q9H115	NAPB	no	no	no	yes	yes
randomized set 19	A4D1P6	WDR91	no	no	no	yes	yes
randomized set 19	Q8N556	AFAP1	no	no	yes	no	yes
randomized set 19	P35241	RDX	yes	no	yes	yes	yes
randomized set 19	Q9Y4X0	AMMECR1	yes	no	yes	yes	yes
randomized set 19	Q8NCR6	SMRP1	no	no	no	yes	no
randomized set 19	Q9ULX6	AKAP8L	no	no	no	no	yes
randomized set 19	Q99880	H2BC13	no	no	yes	no	no
randomized set 19	Q9H633	RPP21	no	yes	no	no	no
randomized set 19	Q6NUJ2	C11orf87	no	yes	no	no	no
randomized set 19	Q16394	EXT1	no	no	yes	no	yes
randomized set 19	Q6P6C2	ALKBH5	no	no	no	yes	yes
randomized set 19	P20023	CR2	no	no	yes	no	no
randomized set 19	Q9BV73	CEP250	no	no	yes	no	no
randomized set 19	P55884	EIF3B	no	no	no	no	yes
randomized set 19	O43707	ACTN4	yes	no	yes	yes	yes
randomized set 19	Q96A61	TRIM52	no	yes	no	no	no
randomized set 19	Q9H1V8	SLC6A17	no	no	yes	no	yes
randomized set 19	O14863	SLC30A4	yes	no	yes	yes	yes
randomized set 19	Q8TDQ0	HAVCR2	no	yes	no	no	no
randomized set 19	Q8IZP9	ADGRG2	yes	no	yes	yes	yes
randomized set 19	Q6RI45	BRWD3	no	no	yes	no	yes
randomized set 19	P27487	DPP4	no	no	yes	no	no
randomized set 19	Q9P032	NDUFAF4	no	yes	no	no	no
randomized set 19	Q58EX7	PLEKHG4	no	no	yes	yes	no
randomized set 19	P35452	HOXD12	no	no	yes	no	no
randomized set 19	Q5T751	LCE1C	no	yes	no	no	no
randomized set 20	Q9HAW4	CLSPN	no	no	no	no	yes
randomized set 20	Q502W6	VWA3B	no	yes	no	no	no
randomized set 20	P10620	MGST1	no	yes	no	no	no
randomized set 20	Q6ZMI0	PPP1R21	no	no	no	yes	no
randomized set 20	P36405	ARL3	no	no	no	no	yes
randomized set 20	P02753	RBP4	no	no	no	yes	yes
randomized set 20	O95168	NDUFB4	no	yes	no	no	no
randomized set 20	Q14332	FZD2	no	no	yes	no	no
randomized set 20	P13928	ANXA8	no	no	no	no	no
randomized set 20	A6NJ78	METTL15	no	no	no	yes	no
randomized set 20	Q9UBX0	HESX1	no	no	no	yes	yes
randomized set 20	O43827	ANGPTL7	no	no	no	yes	no
randomized set 20	Q9NR21	PARP11	no	no	yes	yes	no
randomized set 20	O75355	ENTPD3	no	no	no	yes	no
randomized set 20	Q8N2G4	LYPD1	no	no	no	yes	no
randomized set 20	P04000	OPN1LW	no	no	yes	yes	yes
randomized set 20	O95996	APC2	no	no	yes	no	yes
randomized set 20	O00526	UPK2	no	no	no	yes	no
randomized set 20	P13164	IFITM1	no	yes	no	no	no
randomized set 20	P55201	BRPF1	yes	no	yes	yes	yes
randomized set 20	P04279	SEMG1	no	yes	no	no	no
randomized set 20	Q2TAL8	QRICH1	no	no	no	yes	yes
randomized set 20	P29353	SHC1	no	no	yes	yes	yes
randomized set 20	P15509	CSF2RA	no	yes	no	no	no
randomized set 20	O14815	CAPN9	no	no	yes	no	no
randomized set 20	Q7Z494	NPHP3	no	no	no	no	yes
randomized set 20	Q14CX7	NAA25	no	no	no	yes	yes
randomized set 20	Q03933	HSF2	no	no	yes	no	yes
randomized set 20	A0AVT1	UBA6	no	no	no	yes	yes
randomized set 20	Q7L2J0	MEPCE	no	no	no	no	yes
randomized set 20	Q8N201	INTS1	no	no	no	no	yes
randomized set 20	O00116	AGPS	no	no	no	yes	yes
randomized set 20	Q96CA5	BIRC7	no	yes	no	no	no
randomized set 20	P11166	SLC2A1	no	no	yes	no	yes
randomized set 20	P20265	POU3F2	no	no	yes	no	no
randomized set 20	P15144	ANPEP	no	no	yes	yes	yes
randomized set 20	Q8IVG9	MT-RNR2	no	no	no	no	no
randomized set 20	Q01664	TFAP4	no	no	no	no	yes
randomized set 20	Q3SXY8	ARL13B	no	no	no	yes	no
randomized set 20	Q9BSI4	TINF2	no	no	no	no	yes
randomized set 20	P12318	FCGR2A	no	yes	no	no	no
randomized set 20	Q14508	WFDC2	no	no	no	yes	no
randomized set 20	Q9Y3I1	FBXO7	no	no	no	yes	yes
randomized set 20	Q16623	STX1A	no	no	yes	yes	yes
randomized set 20	Q76LX8	ADAMTS13	no	no	no	yes	no
randomized set 20	Q9UI36	DACH1	no	no	no	no	yes
randomized set 20	Q96AK3	APOBEC3D	no	yes	no	no	no
randomized set 20	O95343	SIX3	no	no	yes	no	yes
randomized set 20	Q99460	PSMD1	no	no	no	no	yes
randomized set 20	P08651	NFIC	no	no	yes	no	yes
randomized set 20	P01040	CSTA	no	yes	no	no	no
randomized set 20	Q92934	BAD	no	no	no	yes	yes
randomized set 20	P49418	AMPH	no	no	yes	yes	yes
randomized set 20	Q9BYR0	KRTAP4-7	no	yes	no	no	no
randomized set 20	O00429	DNM1L	no	no	no	no	yes
randomized set 20	Q8NFC6	BOD1L1	no	no	no	yes	yes
randomized set 20	Q8N511	TMEM199	no	no	no	yes	no
randomized set 20	P46020	PHKA1	no	no	yes	no	yes
randomized set 20	Q13162	PRDX4	no	no	no	no	yes
randomized set 20	P17948	FLT1	yes	no	yes	yes	yes
randomized set 20	Q8IWA5	SLC44A2	no	no	yes	yes	yes
randomized set 20	Q8N1B4	VPS52	no	no	no	yes	yes
randomized set 20	Q9UNF1	MAGED2	no	no	yes	no	yes
randomized set 20	O60256	PRPSAP2	no	no	yes	yes	yes
randomized set 20	Q9H7P6	MVB12B	no	no	yes	no	yes
randomized set 20	Q4G0X4	KCTD21	no	no	yes	no	no
randomized set 20	P0DPH8	TUBA3D	no	no	yes	no	no
randomized set 20	Q6XD76	ASCL4	no	yes	no	no	no
randomized set 20	Q8N2A8	PLD6	no	yes	no	no	no
randomized set 20	Q9NWF9	RNF216	no	no	no	no	yes
randomized set 20	Q9NYA1	SPHK1	no	no	yes	no	yes
randomized set 20	P18031	PTPN1	no	no	yes	yes	yes
randomized set 20	Q9H1D0	TRPV6	no	no	yes	no	no
randomized set 20	Q8WXF1	PSPC1	yes	no	yes	yes	yes
randomized set 20	Q9NWX5	ASB6	no	yes	no	no	no
randomized set 20	Q9UJX2	CDC23	no	no	no	yes	yes
randomized set 20	Q9UIG4	PSORS1C2	no	yes	no	yes	no
randomized set 20	Q9Y6A2	CYP46A1	no	no	no	yes	yes
randomized set 20	O75907	DGAT1	no	no	no	yes	no
randomized set 20	Q86SG3	DAZ4	no	no	no	no	no
randomized set 20	Q86WA9	SLC26A11	no	yes	no	no	no
randomized set 20	Q8WV22	NSMCE1	no	yes	no	no	no
randomized set 20	Q96NW7	LRRC7	yes	no	yes	yes	yes
randomized set 20	Q92826	HOXB13	no	no	yes	yes	no
randomized set 20	O75695	RP2	no	no	no	yes	yes
randomized set 20	P45985	MAP2K4	no	no	no	no	yes
randomized set 20	Q9BR39	JPH2	no	no	yes	no	yes
randomized set 20	Q92925	SMARCD2	yes	no	yes	yes	yes
randomized set 20	Q6ZMB0	B3GNT6	no	no	no	yes	no
randomized set 21	Q6ZMG9	CERS6	no	no	yes	yes	yes
randomized set 21	Q8IWL3	HSCB	no	yes	no	no	no
randomized set 21	Q92889	ERCC4	no	yes	no	no	no
randomized set 21	Q96JF0	ST6GAL2	no	no	yes	yes	no
randomized set 21	Q86SX6	GLRX5	no	no	no	no	no
randomized set 21	P49747	COMP	no	no	yes	no	no
randomized set 21	P15941	MUC1	no	no	no	yes	no
randomized set 21	Q96EY7	PTCD3	no	yes	no	no	no
randomized set 21	P63162	SNRPN	no	no	no	yes	yes
randomized set 21	P15622	ZNF250	no	no	yes	no	no
randomized set 21	P10767	FGF6	no	no	yes	no	yes
randomized set 21	Q86T24	ZBTB33	no	no	yes	no	yes
randomized set 21	Q8N5F7	NKAP	no	no	no	yes	yes
randomized set 21	P60484	PTEN	no	no	no	yes	yes
randomized set 21	P07148	FABP1	no	no	yes	yes	no
randomized set 21	P35523	CLCN1	no	no	yes	no	no
randomized set 21	Q86UY6	NAA40	no	yes	no	no	no
randomized set 21	Q9UI43	MRM2	no	yes	no	no	no
randomized set 21	Q16696	CYP2A13	no	yes	no	no	no
randomized set 21	P22695	UQCRC2	no	no	no	no	yes
randomized set 21	Q9BV81	EMC6	no	no	no	no	yes
randomized set 21	P42568	MLLT3	no	no	yes	no	yes
randomized set 21	Q8TED1	GPX8	no	no	yes	no	no
randomized set 21	Q08830	FGL1	no	no	yes	yes	no
randomized set 21	Q9UQM7	CAMK2A	no	no	yes	no	yes
randomized set 21	Q9NQC1	JADE2	yes	no	yes	yes	yes
randomized set 21	P22732	SLC2A5	no	no	yes	no	no
randomized set 21	Q96PC3	AP1S3	no	no	no	yes	yes
randomized set 21	O75131	CPNE3	no	no	yes	yes	no
randomized set 21	P53680	AP2S1	no	no	no	no	yes
randomized set 21	Q8WXG6	MADD	no	no	no	no	yes
randomized set 21	O43768	ENSA	no	no	yes	no	no
randomized set 21	P43487	RANBP1	no	no	no	no	yes
randomized set 21	Q6ZMI3	GLDN	no	no	yes	yes	no
randomized set 21	Q5JTZ9	AARS2	no	yes	no	no	no
randomized set 21	P38935	IGHMBP2	no	no	no	yes	no
randomized set 21	Q9NWU1	OXSM	no	no	no	yes	no
randomized set 21	P49327	FASN	no	no	no	no	yes
randomized set 21	Q9BWP8	COLEC11	no	no	yes	yes	yes
randomized set 21	Q9Y2H9	MAST1	no	no	yes	no	yes
randomized set 21	P42765	ACAA2	no	no	no	yes	no
randomized set 21	Q9HB96	FANCE	no	no	no	no	yes
randomized set 21	Q6PL24	TMED8	no	no	yes	yes	no
randomized set 21	Q969Z3	MTARC2	no	yes	no	no	no
randomized set 21	Q15257	PTPA	no	no	no	no	yes
randomized set 21	Q99574	SERPINI1	yes	no	yes	yes	yes
randomized set 21	Q9UK32	RPS6KA6	no	no	yes	yes	yes
randomized set 21	Q16853	AOC3	no	yes	no	no	no
randomized set 21	Q7L8C5	SYT13	no	no	no	yes	yes
randomized set 21	Q6P4Q7	CNNM4	no	no	yes	yes	no
randomized set 21	P14222	PRF1	no	no	no	yes	no
randomized set 21	O15520	FGF10	no	no	yes	no	yes
randomized set 21	Q9GZQ8	MAP1LC3B	no	no	yes	no	yes
randomized set 21	Q6ZV29	PNPLA7	no	no	yes	no	no
randomized set 21	P15311	EZR	no	no	yes	no	yes
randomized set 21	P01148	GNRH1	no	no	no	yes	no
randomized set 21	Q9H867	VCPKMT	no	yes	no	no	no
randomized set 21	Q9H252	KCNH6	no	no	yes	yes	no
randomized set 21	Q66K79	CPZ	no	no	yes	no	no
randomized set 21	Q96FL8	SLC47A1	no	no	no	yes	no
randomized set 21	P07951	TPM2	no	no	yes	yes	no
randomized set 21	Q495M9	USH1G	no	no	yes	no	no
randomized set 21	Q8N441	FGFRL1	no	no	no	no	yes
randomized set 21	Q68DA7	FMN1	no	yes	no	no	no
randomized set 21	Q13043	STK4	no	no	yes	yes	yes
randomized set 21	Q8TAE7	KCNG3	no	no	yes	yes	yes
randomized set 21	Q8NHW3	MAFA	no	no	yes	no	no
randomized set 21	Q9HCM3	KIAA1549	no	no	yes	yes	yes
randomized set 21	Q8WTS1	ABHD5	no	no	yes	yes	no
randomized set 21	Q7RTP6	MICAL3	no	no	no	no	yes
randomized set 21	Q02446	SP4	yes	no	yes	yes	yes
randomized set 21	P14373	TRIM27	no	no	yes	yes	yes
randomized set 21	Q16854	DGUOK	no	no	yes	yes	no
randomized set 21	P00533	EGFR	no	no	yes	no	yes
randomized set 21	O43598	DNPH1	no	yes	no	no	no
randomized set 21	Q5VVX9	UBE2U	no	no	no	yes	no
randomized set 21	Q16401	PSMD5	no	yes	no	no	no
randomized set 21	Q05823	RNASEL	no	yes	no	no	no
randomized set 21	Q9HAN9	NMNAT1	no	no	no	no	yes
randomized set 21	Q9C0E4	GRIP2	no	no	yes	no	no
randomized set 21	Q96PH1	NOX5	no	yes	no	no	no
randomized set 21	P62304	SNRPE	no	no	no	no	yes
randomized set 21	Q8IWU6	SULF1	no	no	yes	yes	yes
randomized set 21	Q8TEB1	DCAF11	no	no	no	no	yes
randomized set 21	Q9NYV4	CDK12	yes	no	yes	yes	yes
randomized set 21	Q9Y2G5	POFUT2	no	yes	no	no	no
randomized set 21	Q8N6L0	KASH5	no	no	no	yes	no
randomized set 21	P28290	ITPRID2	no	yes	no	no	no
randomized set 21	Q9Y6Y0	IVNS1ABP	no	no	no	no	yes
randomized set 22	Q96LA6	FCRL1	no	no	no	yes	no
randomized set 22	Q8N0V3	RBFA	no	yes	no	no	no
randomized set 22	P0DN86	CGB3	no	yes	no	no	no
randomized set 22	Q9UK76	JPT1	no	yes	no	no	no
randomized set 22	Q9Y5U8	MPC1	no	yes	no	no	no
randomized set 22	Q6PRD1	GPR179	no	no	no	no	no
randomized set 22	Q12884	FAP	no	no	yes	yes	yes
randomized set 22	Q8IWU9	TPH2	no	no	yes	yes	yes
randomized set 22	Q9H251	CDH23	no	no	yes	no	yes
randomized set 22	P14780	MMP9	no	no	yes	yes	no
randomized set 22	Q9Y6B7	AP4B1	no	no	yes	yes	no
randomized set 22	O95166	GABARAP	no	no	yes	no	yes
randomized set 22	O60725	ICMT	no	no	no	no	yes
randomized set 22	Q6UXK2	ISLR2	no	no	no	no	no
randomized set 22	P02788	LTF	no	no	yes	yes	no
randomized set 22	O00444	PLK4	no	no	no	yes	yes
randomized set 22	Q9Y6U3	SCIN	no	no	yes	no	no
randomized set 22	O60880	SH2D1A	no	no	yes	yes	yes
randomized set 22	Q9Y230	RUVBL2	no	no	no	no	yes
randomized set 22	Q9BY76	ANGPTL4	no	yes	no	no	no
randomized set 22	O95807	TMEM50A	no	no	yes	yes	no
randomized set 22	Q8ND04	SMG8	no	no	no	no	yes
randomized set 22	P28676	GCA	no	no	yes	no	no
randomized set 22	Q8NB78	KDM1B	no	no	no	yes	yes
randomized set 22	Q9H3L0	MMADHC	no	yes	no	no	no
randomized set 22	Q7L0X0	TRIL	no	no	no	no	no
randomized set 22	P80192	MAP3K9	yes	no	yes	yes	yes
randomized set 22	P18846	ATF1	no	no	yes	yes	yes
randomized set 22	Q9NPA1	KCNMB3	no	no	no	yes	no
randomized set 22	Q96LD4	TRIM47	no	no	no	yes	yes
randomized set 22	P55851	UCP2	no	no	yes	yes	yes
randomized set 22	Q9H2B4	SLC26A1	no	no	yes	no	no
randomized set 22	P53674	CRYBB1	no	no	yes	yes	no
randomized set 22	Q9Y4Y9	LSM5	no	no	no	no	yes
randomized set 22	Q9H0R1	AP5M1	no	no	no	yes	yes
randomized set 22	O14756	HSD17B6	no	no	yes	no	no
randomized set 22	Q9NV92	NDFIP2	no	no	yes	no	yes
randomized set 22	Q9NZC3	GDE1	no	no	no	no	yes
randomized set 22	Q9Y2V2	CARHSP1	no	no	yes	no	no
randomized set 22	P35398	RORA	yes	no	yes	yes	yes
randomized set 22	P00156	MT-CYB	no	no	no	no	no
randomized set 22	Q9UKB1	FBXW11	yes	no	yes	yes	yes
randomized set 22	Q02962	PAX2	no	no	yes	yes	yes
randomized set 22	O75807	PPP1R15A	no	no	no	yes	no
randomized set 22	P09467	FBP1	no	no	no	yes	yes
randomized set 22	Q15834	CCDC85B	no	no	yes	no	no
randomized set 22	O43181	NDUFS4	no	no	no	yes	no
randomized set 22	Q6VVX0	CYP2R1	no	no	no	yes	no
randomized set 22	Q01105	SET	no	no	yes	no	yes
randomized set 22	Q96RU3	FNBP1	no	no	yes	yes	yes
randomized set 22	P11086	PNMT	no	no	yes	yes	no
randomized set 22	Q8NBS9	TXNDC5	no	yes	no	no	no
randomized set 22	O15067	PFAS	no	no	no	yes	yes
randomized set 22	P50336	PPOX	no	no	no	no	yes
randomized set 22	Q9Y225	RNF24	no	no	yes	no	yes
randomized set 22	Q9NQT4	EXOSC5	no	no	no	yes	yes
randomized set 22	Q99731	CCL19	no	yes	no	no	no
randomized set 22	Q9UNI1	CELA1	no	no	no	yes	no
randomized set 22	Q02388	COL7A1	no	no	no	yes	yes
randomized set 22	Q8NDL9	AGBL5	no	no	no	yes	yes
randomized set 22	Q96MU7	YTHDC1	no	no	no	no	yes
randomized set 22	O15068	MCF2L	no	no	yes	no	yes
randomized set 22	P60508	ERVFRD-1	no	yes	no	no	no
randomized set 22	Q9NRJ7	PCDHB16	no	no	no	no	no
randomized set 22	P43364	MAGEA11	no	no	no	no	no
randomized set 22	Q9NXC5	MIOS	no	yes	no	no	no
randomized set 22	Q7Z4H3	HDDC2	no	no	no	yes	no
randomized set 22	Q15326	ZMYND11	no	no	no	no	yes
randomized set 22	P19878	NCF2	no	no	yes	yes	yes
randomized set 22	Q9UNU6	CYP8B1	no	yes	no	no	no
randomized set 22	Q9Y5B9	SUPT16H	no	no	no	no	yes
randomized set 22	Q8TDH9	BLOC1S5	no	yes	no	no	no
randomized set 22	P10451	SPP1	no	no	no	yes	no
randomized set 22	Q9BX74	TM2D1	no	yes	no	no	no
randomized set 22	P23919	DTYMK	no	no	no	no	no
randomized set 22	P08572	COL4A2	no	no	yes	no	yes
randomized set 22	Q4U2R8	SLC22A6	no	no	yes	yes	no
randomized set 22	Q5HYN5	CT45A1	no	no	no	no	no
randomized set 22	O75037	KIF21B	yes	no	yes	yes	yes
randomized set 22	P0CG48	UBC	no	no	yes	no	yes
randomized set 22	Q2KHT3	CLEC16A	no	no	no	yes	yes
randomized set 22	Q5MNZ9	WIPI1	no	no	yes	no	yes
randomized set 22	Q9NR97	TLR8	no	no	yes	no	yes
randomized set 22	Q7L4P6	BEND5	no	no	no	no	yes
randomized set 22	P30530	AXL	no	no	yes	yes	yes
randomized set 22	Q86WG5	SBF2	no	no	yes	no	no
randomized set 22	Q9NVN8	GNL3L	no	no	no	no	yes
randomized set 22	Q4G176	ACSF3	no	yes	no	no	no
randomized set 22	Q05516	ZBTB16	no	no	no	no	yes
randomized set 23	O00222	GRM8	no	no	yes	no	yes
randomized set 23	Q9H6X2	ANTXR1	yes	no	yes	yes	yes
randomized set 23	O14862	AIM2	no	yes	no	no	no
randomized set 23	Q9H8X9	ZDHHC11	no	no	yes	no	no
randomized set 23	P51828	ADCY7	no	no	yes	no	yes
randomized set 23	Q7RTS9	DYM	no	yes	no	no	no
randomized set 23	P50135	HNMT	no	yes	no	no	no
randomized set 23	Q9BW11	MXD3	no	no	yes	yes	no
randomized set 23	P13682	ZNF35	no	no	no	yes	no
randomized set 23	P49753	ACOT2	no	yes	no	no	no
randomized set 23	Q9ULM3	YEATS2	no	no	no	yes	yes
randomized set 23	Q13118	KLF10	no	no	yes	no	yes
randomized set 23	Q643R3	LPCAT4	no	no	no	yes	yes
randomized set 23	O75581	LRP6	yes	no	yes	yes	yes
randomized set 23	Q9BTY2	FUCA2	no	no	yes	no	no
randomized set 23	Q9UKJ5	CHIC2	no	no	yes	yes	yes
randomized set 23	P23352	ANOS1	no	no	no	no	yes
randomized set 23	Q9UBL6	CPNE7	no	no	yes	no	no
randomized set 23	P11926	ODC1	no	no	yes	no	yes
randomized set 23	Q9BYZ8	REG4	no	yes	no	no	no
randomized set 23	Q9UPY6	WASF3	yes	no	yes	yes	yes
randomized set 23	P98155	VLDLR	no	no	yes	yes	yes
randomized set 23	Q9UPQ9	TNRC6B	no	no	yes	no	yes
randomized set 23	P59942	MCCD1	no	yes	no	no	no
randomized set 23	Q8IWU2	LMTK2	yes	no	yes	yes	yes
randomized set 23	P05543	SERPINA7	no	yes	no	no	no
randomized set 23	Q9Y5S1	TRPV2	no	no	yes	yes	no
randomized set 23	Q9BX70	BTBD2	no	no	yes	no	yes
randomized set 23	P80303	NUCB2	no	no	yes	yes	no
randomized set 23	O95997	PTTG1	no	no	no	no	yes
randomized set 23	Q9UDV6	ZNF212	no	yes	no	no	no
randomized set 23	Q8IYR0	CFAP206	no	no	no	yes	no
randomized set 23	P38159	RBMX	no	no	no	no	yes
randomized set 23	Q6ZYL4	GTF2H5	no	no	no	no	yes
randomized set 23	Q14005	IL16	no	yes	no	no	no
randomized set 23	Q63HN8	RNF213	no	yes	no	no	no
randomized set 23	Q96HU1	SGSM3	no	no	no	no	yes
randomized set 23	Q9Y2C4	EXOG	no	no	no	yes	no
randomized set 23	Q9BXJ1	C1QTNF1	no	no	yes	yes	yes
randomized set 23	P17600	SYN1	no	no	yes	no	yes
[truncated: 87,002 more rows]
